# Supplementary material
Source: PubMed Central journal article supplement (PMC1599912)
Supplement: pnas_0601852103_11.pdf [file pnas_0601852103_11.pdf]

**Table 5. List of modules**

For each of 165 modules, we list the expression regulators, chromosomal markers, and the module genes. These modules can be interactively viewed by using our visualization software Genomica (can be downloaded from <http://genomica.weizmann.ac.il/index.html>) and the file containing the modules information (can be downloaded from <http://ai.stanford.edu/~koller/seqvar.gxp>). The visualization gives access to the modules gene expression and annotations as well as interactive viewing of the information in this table. For the expression regulators and module genes, it provides ORF name, gene name, and SGD description. For the genotype regulators, we listed the genes that are located within 10 kb upstream/downstream of the genomic region the markers corresponding to the genetic regulator cover. For each of these genes, we provided the number of coding SNPs and upstream SNPs inside the parenthesis.

| (1) MODULE 1                 |            |                                                                                                                                                                                                                                                  |
|------------------------------|------------|--------------------------------------------------------------------------------------------------------------------------------------------------------------------------------------------------------------------------------------------------|
| <b>Expression regulators</b> |            |                                                                                                                                                                                                                                                  |
| YNL145W                      | MFA2       | lipopeptide mating pheromone; mating a-factor pheromone precursor                                                                                                                                                                                |
| YHR005C                      | GPA1       | Alpha subunit of G protein coupled to mating factor receptors, involved in the mating pheromone signal transduction pathway; component of pheromone response pathway common to both a and alpha cells                                            |
| <b>Module genes</b>          |            |                                                                                                                                                                                                                                                  |
| YCL065W                      | None       |                                                                                                                                                                                                                                                  |
| YKL177W                      | None       |                                                                                                                                                                                                                                                  |
| YCL067C                      | HMLALPHA2  | Silenced copy of ALPHA2, encoding a homeobox-domain containing protein that associates with Mcm1p in haploid cells to repress a-specific gene expression and interacts with A1p in diploid cells to repress haploid-specific gene expression     |
| YCR040W                      | MATALPHA1  | Transcriptional co-activator involved in regulation of mating-type-specific gene expression; targets the transcription factor Mcm1p to the promoters of alpha-specific genes; one of two genes encoded by the alpha mating type cassette         |
| YCL066W                      | HMLALPHA1  | Silenced copy of ALPHA1, encoding a transcriptional coactivator involved in the regulation of mating-type alpha-specific gene expression                                                                                                         |
| YJR004C                      | SAG1       | Alpha-agglutinin of alpha-cells, binds to Aga1p during agglutination, N-terminal half is homologous to the immunoglobulin superfamily and contains binding site for a-agglutinin, C-terminal half is highly glycosylated and contains GPI anchor |
| YGL090W                      | LIF1       | Protein involved in DNA double-strand break repair; physically interacts with DNA ligase 4 (Lig4p); homologous to mammalian XRCC4 protein                                                                                                        |
| YLR041W                      | None       |                                                                                                                                                                                                                                                  |
| YCR041W                      | None       |                                                                                                                                                                                                                                                  |
| YPL187W                      | MF(ALPHA)1 | mating factor alpha                                                                                                                                                                                                                              |
| YCR039C                      | MATALPHA2  | Homeobox-domain containing protein which, in haploid cells, acts with Mcm1p to repress a-specific genes; in diploid cells                                                                                                                        |

|                              |            |                                                                                                                                                                                                                                                   |
|------------------------------|------------|---------------------------------------------------------------------------------------------------------------------------------------------------------------------------------------------------------------------------------------------------|
|                              |            | Alpha2p acts together with A1p to repress transcription of haploid-specific genes                                                                                                                                                                 |
| YOR090C                      | PTC5       | Phosphatase type Two C; Type 2C Protein Phosphatase                                                                                                                                                                                               |
| YCR096C                      | HMRA2      | Silenced copy of A2, encoding a protein of with similarity to Alpha2p that is required along with A1p for inhibiting expression of the HO endonuclease in a/alpha HO/HO diploid cells with an active mating-type interconversion system           |
| YGL089C                      | MF(ALPHA)2 | alpha mating factor                                                                                                                                                                                                                               |
| YLR040C                      | None       |                                                                                                                                                                                                                                                   |
| YKL178C                      | STE3       | Cell surface a factor receptor, transcribed in alpha cells and required for mating by alpha cells, couples to a MAP kinase cascade to mediate pheromone response; ligand bound receptors undergo endocytosis and recycling to the plasma membrane |
| (2) MODULE 2                 |            |                                                                                                                                                                                                                                                   |
| <b>Genotype regulators</b>   |            |                                                                                                                                                                                                                                                   |
| M8_5776_19171                |            | MUP3(0,5) YHL037C CBP2(45,5) YHL039W ARN1(3,0) YHL041W YHL042W ECM34(2,6) YHL044W YHL045W YHL046C YHL046W-A ARN2(308,525) YHL048C-A COS8(79,2) YHL049C YHL050C YHL050W-A                                                                          |
| <b>Module genes</b>          |            |                                                                                                                                                                                                                                                   |
| YHL047C                      | ARN2       | Transporter, member of the ARN family of transporters that specifically recognize siderophore-iron chelates; responsible for uptake of iron bound to the siderophore triacetylfusarinine C                                                        |
| YHL044W                      | None       |                                                                                                                                                                                                                                                   |
| (3) MODULE 3                 |            |                                                                                                                                                                                                                                                   |
| <b>Expression regulators</b> |            |                                                                                                                                                                                                                                                   |
| YDR225W                      | HTA1       | One of two nearly identical (see also HTA2) histone H2A subtypes; core histone required for chromatin assembly and chromosome function; DNA damage-dependent phosphorylation by Mec1p facilitates DNA repair; acetylated by Nat4p                 |
| YDL101C                      | DUN1       | Cell-cycle checkpoint serine-threonine kinase required for DNA damage-induced transcription of certain target genes, phosphorylation of Rad55p and Sml1p, and transient G2/M arrest after DNA damage; also regulates postreplicative DNA repair   |
| <b>Genotype regulators</b>   |            |                                                                                                                                                                                                                                                   |
| M1_1_37068                   |            | ACS1(2,7) PEX22(3,3) YAL056C-A GPB2(10,6) CNE1(9,5) YAL058C-A YAL059C-A ECM1(4,2) BDH1(6,5) YAL061W GDH3(0,50) FLO9(880,506) YAL063C-A YAL064C-A YAL064W YAL064W-B YAL065C YAL066W SEO1(370,503) YAL067W-A YAL068C YAL068W-A YAL069W              |
| <b>Module genes</b>          |            |                                                                                                                                                                                                                                                   |
| YAR062W                      | None       |                                                                                                                                                                                                                                                   |
| YAL065C                      | None       |                                                                                                                                                                                                                                                   |
| YAR050W                      | FLO1       | Lectin-like protein involved in flocculation, cell wall protein that binds to mannose chains on the surface of other cells, confers floc-forming ability that is chymotrypsin sensitive and heat resistant; similar to Flo5p                      |

|                              |        |                                                                                                                                                                                                                                                                             |
|------------------------------|--------|-----------------------------------------------------------------------------------------------------------------------------------------------------------------------------------------------------------------------------------------------------------------------------|
| YHR213W                      | None   |                                                                                                                                                                                                                                                                             |
| YAL064W-B                    | None   |                                                                                                                                                                                                                                                                             |
| YAL063C                      | FLO9   | Lectin-like protein with similarity to Flo1p, thought to be expressed and involved in flocculation                                                                                                                                                                          |
| YHR211W                      | FLO5   | Lectin-like protein involved in flocculation, cell wall protein that binds to mannose chains on the surface of other cells, confers floc-forming ability that is chymotrypsin resistant but heat labile; similar to Flo1p                                                   |
| (4) MODULE 4                 |        |                                                                                                                                                                                                                                                                             |
| <b>Expression regulators</b> |        |                                                                                                                                                                                                                                                                             |
| YOR210W                      | RPB10  | RNA polymerase subunit, found in RNA polymerase complexes I, II, and III                                                                                                                                                                                                    |
| YAL040C                      | CLN3   | role in cell cycle START; involved in G(sub)1 size control; G(sub)1 cyclin                                                                                                                                                                                                  |
| YPL075W                      | GCR1   | Transcriptional activator of genes involved in glycolysis, functions and interacts with Gcr2p                                                                                                                                                                               |
| YKL032C                      | IXR1   | Protein that binds DNA containing intrastrand cross-links formed by cisplatin, contains two HMG (high mobility group box) domains, which confer the ability to bend cisplatin-modified DNA; mediates aerobic transcriptional repression of COX5b                            |
| <b>Genotype regulators</b>   |        |                                                                                                                                                                                                                                                                             |
| M13_46070_69122              |        | VPS9(7,4) TAF13(3,0) ARG81(14,0) YML099W-A TSL1(3,1) YML100W-A CUE4(0,0) YML101C-A YML102C-A CAC2(2,0) NUP188(7,0) MDM1(416,120) SEC65(0,4) URA5(0,4) YML107C YML108W ZDS2(8,7) COQ5(2,7) BUL2(2,11) CTK3(2,0) DAT1(5,2) TAF8(2,2) VAN1(1,2) ATR1(0,56) YML116W-A YML117W-A |
| <b>Module genes</b>          |        |                                                                                                                                                                                                                                                                             |
| YHR157W                      | REC104 | Protein involved in early stages of meiotic recombination; required for meiotic crossing over; forms a complex with Rec102p and Spo11p necessary during the initiation of recombination                                                                                     |
| YLR058C                      | SHM2   | serine hydroxymethyltransferase                                                                                                                                                                                                                                             |
| YDR019C                      | GCV1   | T subunit of the mitochondrial glycine decarboxylase complex, required for the catabolism of glycine to 5,10-methylene-THF; expression is regulated by levels of levels of 5,10-methylene-THF in the cytoplasm                                                              |
| YCL064C                      | CHA1   | catabolism of hydroxy amino acids; catabolic serine (threonine) dehydratase                                                                                                                                                                                                 |
| YGL255W                      | ZRT1   | High-affinity zinc transporter of the plasma membrane, responsible for the majority of zinc uptake; transcription is induced under low-zinc conditions by the Zap1p transcription factor                                                                                    |
| YJL056C                      | ZAP1   | Zinc-regulated transcription factor, binds to zinc-responsive promoter elements to induce transcription of certain genes in the presence of zinc; regulates its own transcription; contains seven zinc-finger domains                                                       |
| YHR111W                      | UBA4   | Protein that activates Urm1p before its conjugation to proteins (urmylation); one target is the thioredoxin peroxidase Ahp1p,                                                                                                                                               |

|                              |       |                                                                                                                                                                                                                                             |
|------------------------------|-------|---------------------------------------------------------------------------------------------------------------------------------------------------------------------------------------------------------------------------------------------|
|                              |       | suggesting a role of urmylation in the oxidative stress response                                                                                                                                                                            |
| YIL051C                      | MMF1  | Maintenance of Mitochondrial Function; Maintenance of Mitochondrial DNA 1                                                                                                                                                                   |
| YAL044C                      | GCV3  | H subunit of the mitochondrial glycine decarboxylase complex, required for the catabolism of glycine to 5,10-methylene-THF; expression is regulated by levels of levels of 5,10-methylene-THF in the cytoplasm                              |
| YMR189W                      | GCV2  | P subunit of the mitochondrial glycine decarboxylase complex, required for the catabolism of glycine to 5,10-methylene-THF; expression is regulated by levels of levels of 5,10-methylene-THF in the cytoplasm                              |
| (5) MODULE 5                 |       |                                                                                                                                                                                                                                             |
| <b>Expression regulators</b> |       |                                                                                                                                                                                                                                             |
| YJR122W                      | CAF17 | Mitochondrial protein that interacts with Ccr4p in the two-hybrid system; 3'-untranslated region contains a putative mRNA localization element common to genes encoding mitochondrial proteins                                              |
| YBR274W                      | CHK1  | checkpoint kinase 1; homolog of the <i>S. pombe</i> and mammalian Chk1 checkpoint kinases; Protein kinase Chk1                                                                                                                              |
| YNL031C                      | HHT2  | One of two identical histone H3 proteins (see also HHT1); core histone required for chromatin assembly, involved in heterochromatin-mediated telomeric and HM silencing; regulated by acetylation, methylation, and mitotic phosphorylation |
| YDR264C                      | AKR1  | Negative regulator of pheromone response pathway; required for endocytosis of pheromone receptors; involved in cell shape control; Ankyrin repeat-containing protein                                                                        |
| <b>Genotype regulators</b>   |       |                                                                                                                                                                                                                                             |
| M12_659357_674651            |       | YLR257W GSY2(1,6) HSP60(0,6) LCB5(10,6) VPS63(3,0) YPT6(0,13) RBF7 RED1(13,14) YLR264C-A RPS28B(0,5) NEJ1(7,0) PDR8(8,6) BOP2(4,6) SEC22(0,3) YLR269C DCS1(0,4) YLR271W                                                                     |
| <b>Module genes</b>          |       |                                                                                                                                                                                                                                             |
| YGR209C                      | TRX2  | thioredoxin                                                                                                                                                                                                                                 |
| YGL179C                      | TOS3  | Putative protein kinase, related to and redundant with Elm1p and Pak1p in activating the SNF1 complex                                                                                                                                       |
| YOL101C                      | IZH4  | Membrane protein involved in zinc metabolism, member of the four-protein IZH family, expression induced by fatty acids and altered zinc levels; deletion reduces sensitivity to excess zinc; possible role in sterol metabolism             |
| YGR037C                      | ACB1  | Acyl-CoA-binding protein, transports newly synthesized acyl-CoA esters from fatty acid synthetase (Fas1p-Fas2p) to acyl-CoA-consuming processes                                                                                             |
| YDR213W                      | UPC2  | involved in sterol uptake; zinc finger transcription factor of the Zn(2)-Cys(6) binuclear cluster domain type                                                                                                                               |
| YDR518W                      | EUG1  | Protein disulfide isomerase of the endoplasmic reticulum lumen, function overlaps with that of Pdi1p; may interact with nascent polypeptides in the ER                                                                                      |
| YOR092W                      | ECM3  | Non-essential protein of unknown function                                                                                                                                                                                                   |
| YLR255C                      | None  |                                                                                                                                                                                                                                             |

|                            |       |                                                                                                                                                                                                                                                  |
|----------------------------|-------|--------------------------------------------------------------------------------------------------------------------------------------------------------------------------------------------------------------------------------------------------|
| YOR377W                    | ATF1  | Alcohol acetyltransferase with potential roles in lipid and sterol metabolism; responsible for the major part of volatile acetate ester production during fermentation                                                                           |
| YHR179W                    | OYE2  | Widely conserved NADPH oxidoreductase containing flavin mononucleotide (FMN), homologous to Oye3p with slight differences in ligand binding and catalytic properties; may be involved in sterol metabolism                                       |
| YER011W                    | TIR1  | Cell wall mannoprotein of the Srp1p/Tip1p family of serine-alanine-rich proteins; expression is downregulated at acidic pH and induced by cold shock                                                                                             |
| YOR229W                    | WTM2  | WD repeat containing transcriptional modulator 2; Transcriptional modulator                                                                                                                                                                      |
| YOR321W                    | PMT3  | Transfers mannose residues from dolichyl phosphate-D-mannose to specific serine/threonine residues of proteins in the secretory pathway; dolichyl phosphate-D-mannose:protein O-D-mannosyltransferase                                            |
| YBR067C                    | TIP1  | cold- and heat-shock induced protein of the Srp1p/Tip1p family of serine-alanine-rich proteins; cell wall mannoprotein                                                                                                                           |
| YLR244C                    | MAP1  | Methionine aminopeptidase, catalyzes the cotranslational removal of N-terminal methionine from nascent polypeptides; function is partially redundant with that of Map2p                                                                          |
| YOR175C                    | None  |                                                                                                                                                                                                                                                  |
| YKL008C                    | LAC1  | Ceramide synthase component, involved in synthesis of ceramide from C26(acyl)-coenzyme A and dihydrosphingosine or phytosphingosine, functionally equivalent to Lag1p                                                                            |
| YIL121W                    | QDR2  | Multidrug transporter responsible for resistance to quinidine and barban; member of a family of drug:proton antiporters; plasma membrane transporter                                                                                             |
| YLR265C                    | NEJ1  | Nonhomologous End-Joining regulator 1; Repressed by MAT heterozygosity; Interacts with Lif1p in a yeast two-hybrid assay; Nonhomologous End-Joining regulator 1                                                                                  |
| YDR274C                    | None  |                                                                                                                                                                                                                                                  |
| YDR297W                    | SUR2  | Sphingosine hydroxylase; has a role in sphingolipid metabolism                                                                                                                                                                                   |
| YLR380W                    | CSR1  | Phosphatidylinositol transfer protein with a potential role in lipid turnover; interacts specifically with thioredoxin peroxidase (Tsa2p) and may have a role in oxidative stress resistance                                                     |
| YDR044W                    | HEM13 | Coproporphyrinogen III oxidase, an oxygen requiring enzyme that catalyzes the sixth step in the heme biosynthetic pathway; localizes to the mitochondrial inner membrane; transcription is repressed by oxygen and heme (via Rox1p and Hap1p)    |
| YLR256W                    | HAP1  | Heme-responsive zinc finger transcription factor of the Zn(2)-Cys(6) binuclear cluster domain type; redox sensing regulator of gene expression (activates CYC1, CYC7, CYP3, CYB2, CTT1, COR2, ROX1, ERG9, ERG11, SOD2 and YHB1; represses HEM13) |
| (6) MODULE 6               |       |                                                                                                                                                                                                                                                  |
| <b>Genotype regulators</b> |       |                                                                                                                                                                                                                                                  |
| M11_643655_643655          |       | UBP11(1,2) YKR099C-A BAS1(2,2) SKG1(5,0) SIR1(4,0) FLO10(878,496)                                                                                                                                                                                |
| <b>Module genes</b>        |       |                                                                                                                                                                                                                                                  |

|                              |       |                                                                                                                                                                                                                                                           |
|------------------------------|-------|-----------------------------------------------------------------------------------------------------------------------------------------------------------------------------------------------------------------------------------------------------------|
| YKR103W                      | NFT1  | ORFs YKR103W and YKR104W are merged in different strain backgrounds.                                                                                                                                                                                      |
| YKR105C                      | None  |                                                                                                                                                                                                                                                           |
| YKR080W                      | MTD1  | NAD-dependent 5,10-methylenetetrahydrofolate dehydrogenase, plays a catalytic role in oxidation of cytoplasmic one-carbon units; expression is regulated by Bas1p and Bas2p, repressed by adenine, and may be induced by inositol and choline             |
| YKR104W                      | None  |                                                                                                                                                                                                                                                           |
| YKR087C                      | OMA1  | Metalloendopeptidase of the mitochondrial inner membrane, involved in turnover of membrane-embedded proteins; member of a family of predicted membrane-bound metallopeptidases in prokaryotes and higher eukaryotes                                       |
| YKR102W                      | FLO10 | Lectin-like protein with similarity to Flo1p, thought to be involved in flocculation                                                                                                                                                                      |
| (7) MODULE 7                 |       |                                                                                                                                                                                                                                                           |
| <b>Genotype regulators</b>   |       |                                                                                                                                                                                                                                                           |
| M15_1152_43217               |       | CTR9(13,2) PSF3(1,1) PEX11(0,1) SPT20(4,15) DCP1(0,4) YOL150C GRE2(6,81) FRE7(38,11) YOL153C ZPS1(3,8) YOL155C YOL155W-A HXT11(6,53) YOL157C ENB1(5,8) YOL159C YOL159C-A YOL160W YOL161C YOL162W YOL163W YOL164W YOL164W-A AAD15(7,561) YOL166C YOL166W-A |
| <b>Module genes</b>          |       |                                                                                                                                                                                                                                                           |
| YOL164W                      | None  |                                                                                                                                                                                                                                                           |
| YOL152W                      | FRE7  | Putative ferric reductase with similarity to Fre2p; expression induced by low copper levels but not by low iron levels                                                                                                                                    |
| YOL162W                      | None  |                                                                                                                                                                                                                                                           |
| YDL161W                      | ENT1  | Epsin-like protein involved in endocytosis and actin patch assembly and functionally redundant with Ent2p; binds clathrin via a clathrin-binding domain motif at C-terminus                                                                               |
| YOL163W                      | None  |                                                                                                                                                                                                                                                           |
| (8) MODULE 9                 |       |                                                                                                                                                                                                                                                           |
| <b>Expression regulators</b> |       |                                                                                                                                                                                                                                                           |
| YER177W                      | BMH1  | 14-3-3 protein, major isoform; binds proteins and DNA, involved in regulation of many processes including exocytosis and vesicle transport, Ras/MAPK signaling during pseudohyphal development, rapamycin-sensitive signaling, and others                 |
| YHR005C                      | GPA1  | Alpha subunit of G protein coupled to mating factor receptors, involved in the mating pheromone signal transduction pathway; component of pheromone response pathway common to both a and alpha cells                                                     |
| YPL127C                      | HHO1  | Histone H1, a linker histone required for nucleosome packaging at restricted sites; suppresses DNA repair involving homologous recombination; not required for telomeric silencing, basal transcriptional repression, or efficient sporulation            |
| YDR461W                      | MFA1  | a-factor mating pheromone precursor                                                                                                                                                                                                                       |
| <b>Genotype regulators</b>   |       |                                                                                                                                                                                                                                                           |
| M14_206186_209852            |       | URE2(0,3) ELA1(0,5) PDR16(0,0) CSL4(1,6) BNI4(12,1)                                                                                                                                                                                                       |

|                              |       |                                                                                                                                                                                                                                                 |
|------------------------------|-------|-------------------------------------------------------------------------------------------------------------------------------------------------------------------------------------------------------------------------------------------------|
|                              |       | YNL234W YNL235C SIN4(6,8) YTP1(33,1) KEX2(1,3)<br>LAP3(0,0) NAR1(1,0) ZWF1(1,2)                                                                                                                                                                 |
| <b>Module genes</b>          |       |                                                                                                                                                                                                                                                 |
| YML123C                      | PHO84 | High-affinity inorganic phosphate (Pi) transporter and low-affinity manganese transporter; regulated by Pho4p and Spt7p; mutation confers resistance to arsenate; exit from the ER during maturation requires Pho86p                            |
| YJL012C                      | VTC4  | Phosphate metabolism; transcription is regulated by PHO system; polyphosphate synthetase (putative)                                                                                                                                             |
| YLR404W                      | None  |                                                                                                                                                                                                                                                 |
| YGR233C                      | PHO81 | Cyclin-dependent kinase (CDK) inhibitor, regulates Pho80p-Pho85p and Pcl7p-Pho85p cyclin-CDK complexes in response to phosphate levels; required for derepression of PHO5; transcriptionally regulated by Pho4p and Pho2p                       |
| YCR098C                      | GIT1  | Plasma membrane permease, mediates uptake of the phosphatidylinositol metabolite glycerophosphoinositol as a source of the nutrients inositol and phosphate; expression and transport rate are regulated by phosphate and inositol availability |
| YBR093C                      | PHO5  | One of three repressible acid phosphatases, a glycoprotein that is transported to the cell surface by the secretory pathway; induced by phosphate starvation and coordinately regulated by PHO4 and PHO2                                        |
| YAR071W                      | PHO11 | One of three repressible acid phosphatases, a glycoprotein that is transported to the cell surface by the secretory pathway; induced by phosphate starvation and coordinately regulated by PHO4 and PHO2                                        |
| YPL019C                      | VTC3  | Phosphate metabolism; transcription is regulated by PHO system; polyphosphate synthetase (putative)                                                                                                                                             |
| YLL052C                      | AQY2  | Water channel that mediates the transport of water across cell membranes and may be involved in freeze tolerance; disrupted by a stop codon in many <i>S. cerevisiae</i> strains                                                                |
| YHR136C                      | SPL2  | Protein with similarity to cyclin-dependent kinase inhibitors, overproduction suppresses a plc1 null mutation; green fluorescent protein (GFP)-fusion protein localizes to the cytoplasm in a punctate pattern                                  |
| YDR281C                      | PHM6  | Protein of unknown function, expression is regulated by phosphate levels                                                                                                                                                                        |
| YER072W                      | VTC1  | Protein involved in vacuolar maintenance                                                                                                                                                                                                        |
| YBR296C                      | PHO89 | Na <sup>+</sup> /Pi cotransporter, active in early growth phase; similar to phosphate transporters of <i>Neurospora crassa</i> ; transcription regulated by inorganic phosphate concentrations and Pho4p                                        |
| YHR215W                      | PHO12 | One of three repressible acid phosphatases, a glycoprotein that is transported to the cell surface by the secretory pathway; nearly identical to Pho11p; upregulated by phosphate starvation                                                    |
| YBR092C                      | PHO3  | Acid phosphatase, nearly identical to Pho5p; glycosylated; transported to cell surface by secretory pathway; expression is repressed by thiamine                                                                                                |
| (9) MODULE 10                |       |                                                                                                                                                                                                                                                 |
| <b>Expression regulators</b> |       |                                                                                                                                                                                                                                                 |
| YHR005C                      | GPA1  | Alpha subunit of G protein coupled to mating factor receptors, involved in the mating pheromone signal transduction pathway;                                                                                                                    |

|                              |       |                                                                                                                                                                                                                                               |
|------------------------------|-------|-----------------------------------------------------------------------------------------------------------------------------------------------------------------------------------------------------------------------------------------------|
|                              |       | component of pheromone response pathway common to both a and alpha cells                                                                                                                                                                      |
| <b>Genotype regulators</b>   |       |                                                                                                                                                                                                                                               |
| M11_643655_643655            |       | UBP11(1,2) YKR099C-A BAS1(2,2) SKG1(5,0) SIR1(4,0) FLO10(878,496)                                                                                                                                                                             |
| <b>Module genes</b>          |       |                                                                                                                                                                                                                                               |
| YPR199C                      | ARR1  | Transcriptional activator of the bZIP family, required for transcription of genes involved in resistance to arsenic compounds                                                                                                                 |
| YPR198W                      | SGE1  | Member of drug-resistance protein family; multicopy suppressor of gal11 null mutation                                                                                                                                                         |
| YPR197C                      | None  |                                                                                                                                                                                                                                               |
| (10) MODULE 11               |       |                                                                                                                                                                                                                                               |
| <b>Expression regulators</b> |       |                                                                                                                                                                                                                                               |
| YER040W                      | GLN3  | Transcriptional activator of genes regulated by nitrogen catabolite repression (NCR), localization and activity regulated by quality of nitrogen source                                                                                       |
| YDR224C                      | HTB1  | One of two nearly identical (see HTB2) histone H2B subtypes required for chromatin assembly and chromosome function; Rad6p-Bre1p-Lge1p mediated ubiquitination regulates transcriptional activation, meiotic DSB formation and H3 methylation |
| YDR264C                      | AKR1  | Negative regulator of pheromone response pathway; required for endocytosis of pheromone receptors; involved in cell shape control; Ankyrin repeat-containing protein                                                                          |
| YOR178C                      | GAC1  | Regulatory subunit for Glc7p (protein phosphatase I) for glycogen synthesis; regulatory role also predicted for glucose repression and ion homeostatis; potential Cdc28p substrate                                                            |
| YKR099W                      | BAS1  | Myb-related transcription factor involved in regulating basal and induced expression of genes of the purine and histidine biosynthesis pathways                                                                                               |
| YPR052C                      | NHP6A | Homologous to mammalian high mobility group proteins 1 and 2; functions redundantly with the highly homologous gene, NHP6B; high-mobility group non-histone chromatin protein; 11-kDa nonhistone chromosomal protein                          |
| YJL103C                      | None  |                                                                                                                                                                                                                                               |
| <b>Module genes</b>          |       |                                                                                                                                                                                                                                               |
| YDR425W                      | SNX41 | Sorting nexin that mediates retrieval from endosomes                                                                                                                                                                                          |
| YOR316C                      | COT1  | Vacuolar transporter that mediates zinc transport into the vacuole; overexpression confers resistance to cobalt and rhodium                                                                                                                   |
| YER055C                      | HIS1  | ATP phosphoribosyltransferase, a hexameric enzyme, catalyzes the first step in histidine biosynthesis; mutations cause histidine auxotrophy and sensitivity to Cu, Co, and Ni salts; transcription is regulated by general amino acid control |
| YEL071W                      | DLD3  | D-lactate dehydrogenase, part of the retrograde regulon which consists of genes whose expression is stimulated by damage to mitochondria and reduced in cells grown with glutamate as the sole nitrogen source, located in the cytoplasm      |
| YBR249C                      | ARO4  | 3-deoxy-D-arabino-heptulosonate-7-phosphate (DAHP)                                                                                                                                                                                            |



|           |       |                                                                                                                                                                                                                                                                        |
|-----------|-------|------------------------------------------------------------------------------------------------------------------------------------------------------------------------------------------------------------------------------------------------------------------------|
|           |       | synthase, catalyzes the first step in aromatic amino acid biosynthesis and is feedback-inhibited by tyrosine                                                                                                                                                           |
| YGL026C   | TRP5  | tryptophan synthetase                                                                                                                                                                                                                                                  |
| YER090W   | TRP2  | anthranilate synthase Component I                                                                                                                                                                                                                                      |
| YNL229C   | URE2  | Nitrogen catabolite repression regulator that acts by inhibition of GLN3 transcription in good nitrogen source; altered form of Ure2p creates [URE3] prion                                                                                                             |
| YKL033W-A | None  |                                                                                                                                                                                                                                                                        |
| YHR137W   | ARO9  | Aromatic aminotransferase, catalyzes the first step of tryptophan, phenylalanine, and tyrosine catabolism                                                                                                                                                              |
| YLL051C   | FRE6  | Putative ferric reductase with similarity to Fre2p; expression induced by low iron levels                                                                                                                                                                              |
| YPR005C   | HAL1  | Cytoplasmic protein involved in halotolerance; decreases intracellular Na <sup>+</sup> (via Ena1p) and increases intracellular K <sup>+</sup> by decreasing efflux; expression repressed by Ssn6p-Tup1p and Sko1p and induced by NaCl, KCl, and sorbitol through Gcn4p |
| YIL165C   | None  |                                                                                                                                                                                                                                                                        |
| YGR204W   | ADE3  | Cytoplasmic trifunctional enzyme C1-tetrahydrofolate synthase, involved in single carbon metabolism and required for biosynthesis of purines, thymidylate, methionine, and histidine                                                                                   |
| YBL029W   | None  |                                                                                                                                                                                                                                                                        |
| YLR034C   | SMF3  | Putative metal transporter, Nramp homolog, homolog of SMF1 and SMF2                                                                                                                                                                                                    |
| YGR097W   | ASK10 | Component of the RNA polymerase II holoenzyme, phosphorylated in response to oxidative stress; has a role in destruction of Ssn8p, which relieves repression of stress-response genes                                                                                  |
| YCR099C   | None  |                                                                                                                                                                                                                                                                        |
| YGL162W   | SUT1  | Involved in sterol uptake; hypoxic gene family involved in sterol transport                                                                                                                                                                                            |
| YDR242W   | AMD2  | Putative amidase                                                                                                                                                                                                                                                       |
| YDR234W   | LYS4  | Homoaconitase, catalyzes the conversion of homocitrate to homoisocitrate, which is a step in the lysine biosynthesis pathway                                                                                                                                           |
| YDR126W   | SWF1  | Spore Wall Formation                                                                                                                                                                                                                                                   |
| YDR408C   | ADE8  | Phosphoribosyl-glycinamide transformylase, catalyzes a step in the 'de novo' purine nucleotide biosynthetic pathway                                                                                                                                                    |
| YHL040C   | ARN1  | Transporter, member of the ARN family of transporters that specifically recognize siderophore-iron chelates; responsible for uptake of iron bound to ferrirubin, ferrirhodin, and related siderophores                                                                 |
| YAR015W   | ADE1  | N-succinyl-5-aminoimidazole-4-carboxamide ribotide (SAICAR) synthetase, required for 'de novo' purine nucleotide biosynthesis; red pigment accumulates in mutant cells deprived of adenine                                                                             |
| YBR104W   | YMC2  | Putative mitochondrial inner membrane transporter, member of the mitochondrial carrier (MCF) family                                                                                                                                                                    |
| YDR531W   | None  |                                                                                                                                                                                                                                                                        |
| YIL094C   | LYS12 | Homo-isocitrate dehydrogenase, an NAD-linked mitochondrial enzyme required for the fourth step in the biosynthesis of lysine,                                                                                                                                          |

|         |       |                                                                                                                                                                                                                                                |
|---------|-------|------------------------------------------------------------------------------------------------------------------------------------------------------------------------------------------------------------------------------------------------|
|         |       | in which homo-isocitrate is oxidatively decarboxylated to alpha-ketoadipate                                                                                                                                                                    |
| YJL087C | TRL1  | tRNA ligase                                                                                                                                                                                                                                    |
| YBL103C | RTG3  | Basic helix-loop-helix-leucine zipper (bHLH/Zip) transcription factor that forms a complex with another bHLH/Zip protein, Rtg1p, to activate the retrograde (RTG) and TOR pathways                                                             |
| YNR065C | YSN1  | Sortilin homolog, interacts with proteins of the endocytic machinery                                                                                                                                                                           |
| YIL074C | SER33 | 3-phosphoglycerate dehydrogenase, catalyzes the first step in serine and glycine biosynthesis; isozyme of Ser3p                                                                                                                                |
| YNL129W | NRK1  | Nicotinamide riboside kinase, catalyzes the synthesis of nicotinamide nucleotide (NMN) from nicotinamide riboside; involved in a salvage pathway for NAD <sup>+</sup> biosynthesis                                                             |
| YPL212C | PUS1  | Involved in tRNA biogenesis; intranuclear protein which exhibits a nucleotide-specific intron-dependent tRNA pseudouridine synthase activity                                                                                                   |
| YMR300C | ADE4  | Phosphoribosylpyrophosphate amidotransferase (PRPPAT; amidophosphoribosyltransferase), catalyzes first step of the 'de novo' purine nucleotide biosynthetic pathway                                                                            |
| YHR122W | None  |                                                                                                                                                                                                                                                |
| YKL106W | AAT1  | Mitochondrial aspartate aminotransferase, catalyzes the conversion of oxaloacetate to aspartate in aspartate and asparagine biosynthesis                                                                                                       |
| YER061C | CEM1  | homology with beta-keto-acyl synthases; Protein homologous to beta-keto-acyl synthase                                                                                                                                                          |
| YER045C | ACA1  | Basic leucine zipper (bZIP) transcription factor of the ATF/CREB family, may regulate transcription of genes involved in utilization of non-optimal carbon sources                                                                             |
| YIL173W | VTH1  | vps ten homolog; potential membrane glycoprotein with strong similarity to Vth2 and Pep1/Vps10                                                                                                                                                 |
| YMR120C | ADE17 | Enzyme of 'de novo' purine biosynthesis containing both 5-aminoimidazole-4-carboxamide ribonucleotide transformylase and inosine monophosphate cyclohydrolase activities, isozyme of Ade16p; ade16 ade17 mutants require adenine and histidine |
| YMR063W | RIM9  | Protein required for IME1 expression; involved in sporulation                                                                                                                                                                                  |
| YDR249C | None  |                                                                                                                                                                                                                                                |
| YOR363C | PIP2  | peroxisome induction pathway 2 (PIP2); transcriptional activator of peroxisome proliferation; may form heterodimer with Oaf1 to activate oleate-inducible gene expression; activator of peroxisome proliferation                               |
| YPR058W | YMC1  | Putative mitochondrial inner membrane transporter, member of the mitochondrial carrier (MCF) family                                                                                                                                            |
| YMR019W | STB4  | Protein that binds Sin3p in a two-hybrid assay                                                                                                                                                                                                 |
| YDR380W | ARO10 | Phenylpyruvate decarboxylase, catalyzes decarboxylation of phenylpyruvate to phenylacetaldehyde, which is the first specific step in the Ehrlich pathway                                                                                       |
| YJL222W | VTH2  | vps ten homolog; potential membrane glycoprotein with strong similarity to Vth1 and Pep1                                                                                                                                                       |
| YCL009C | ILV6  | Regulatory subunit of acetolactate synthase, which catalyzes the first step of branched-chain amino acid biosynthesis; enhances                                                                                                                |

|                              |       |                                                                                                                                                                                                                                                                                                                      |
|------------------------------|-------|----------------------------------------------------------------------------------------------------------------------------------------------------------------------------------------------------------------------------------------------------------------------------------------------------------------------|
|                              |       | activity of the Ilv2p catalytic subunit, localizes to mitochondria                                                                                                                                                                                                                                                   |
| YNR066C                      | None  |                                                                                                                                                                                                                                                                                                                      |
| YKR019C                      | IRS4  | Protein involved in regulation of phosphatidylinositol 4,5-bisphosphate concentrations; Irs4p and Tax4p bind and activate the phosphatase Inp51p; mutation confers an increase in rDNA silencing                                                                                                                     |
| YBR035C                      | PDX3  | Pyridoxine (pyridoxamine) phosphate oxidase, has homologs in E. coli and Myxococcus xanthus; transcription is under the general control of nitrogen metabolism                                                                                                                                                       |
| YGL148W                      | ARO2  | Bifunctional chorismate synthase and flavin reductase, catalyzes the conversion of 5-enolpyruvylshikimate 3-phosphate (EPSP) to form chorismate, which is a precursor to aromatic amino acids                                                                                                                        |
| YLR303W                      | MET17 | O-acetyl homoserine-O-acetyl serine sulfhydrylase, required for sulfur amino acid synthesis                                                                                                                                                                                                                          |
| YDR426C                      | None  |                                                                                                                                                                                                                                                                                                                      |
| YER081W                      | SER3  | 3-phosphoglycerate dehydrogenase, catalyzes the first step in serine and glycine biosynthesis; isozyme of Ser33p                                                                                                                                                                                                     |
| YDL171C                      | GLT1  | NAD(+)-dependent glutamate synthase (GOGAT), synthesizes glutamate from glutamine and alpha-ketoglutarate; with Gln1p, forms the secondary pathway for glutamate biosynthesis from ammonia; expression regulated by nitrogen source                                                                                  |
| YLR004C                      | None  |                                                                                                                                                                                                                                                                                                                      |
| YNL240C                      | NAR1  | Component of the cytosolic iron-sulfur (FeS) protein assembly machinery, required for maturation of cytosolic and nuclear FeS proteins; homologous to human Narf (Nuclear prelamins A Recognition Factor); Nuclear architecture related protein with homology to human Narf (Nuclear prelamins A Recognition Factor) |
| YIL046W                      | MET30 | F-box protein containing five copies of the WD40 motif, controls cell cycle function, sulfur metabolism, and methionine biosynthesis as part of the ubiquitin ligase complex; interacts with and regulates Met4p, localizes within the nucleus                                                                       |
| <b>(11) MODULE 12</b>        |       |                                                                                                                                                                                                                                                                                                                      |
| <b>Expression regulators</b> |       |                                                                                                                                                                                                                                                                                                                      |
| YPL230W                      | None  |                                                                                                                                                                                                                                                                                                                      |
| YNL173C                      | MDG1  | Plasma membrane protein involved in G-protein mediated pheromone signaling pathway; overproduction suppresses bem1 mutations                                                                                                                                                                                         |
| YPL230W                      | None  |                                                                                                                                                                                                                                                                                                                      |
| YBL084C                      | CDC27 | Subunit of the Anaphase-Promoting Complex/Cyclosome (APC/C), which is a ubiquitin-protein ligase required for degradation of anaphase inhibitors, including mitotic cyclins, during the metaphase/anaphase transition                                                                                                |
| YGL121C                      | GPG1  | Proposed gamma subunit of the heterotrimeric G protein that interacts with the receptor Grp1p; involved in regulation of pseudohyphal growth; requires Gpb1p or Gpb2p to interact with Gpa2p                                                                                                                         |
| YPR052C                      | NHP6A | Homologous to mammalian high mobility group proteins 1 and 2; functions redundantly with the highly homologous gene,                                                                                                                                                                                                 |

|                     |        |                                                                                                                                                                                                                                         |
|---------------------|--------|-----------------------------------------------------------------------------------------------------------------------------------------------------------------------------------------------------------------------------------------|
|                     |        | NHP6B; high-mobility group non-histone chromatin protein; 11-kDa nonhistone chromosomal protein                                                                                                                                         |
| <b>Module genes</b> |        |                                                                                                                                                                                                                                         |
| YBR116C             | None   |                                                                                                                                                                                                                                         |
| YPL134C             | ODC1   | Mitochondrial inner membrane transporter, exports 2-oxoadipate and 2-oxoglutarate from the mitochondrial matrix to the cytosol for use in lysine and glutamate biosynthesis and in lysine catabolism                                    |
| YIL160C             | POT1   | 3-ketoacyl-CoA thiolase with broad chain length specificity, cleaves 3-ketoacyl-CoA into acyl-CoA and acetyl-CoA during beta-oxidation of fatty acids                                                                                   |
| YPR192W             | AQY1   | Water channel that mediates the transport of water across cell membranes and may be involved in freeze tolerance                                                                                                                        |
| YGR256W             | GND2   | 6-phosphogluconate dehydrogenase, decarboxylating; converts 6-phosphogluconate + NADP to ribulose-5-phosphate + NADPH + CO <sub>2</sub> ; 6-phosphogluconate dehydrogenase                                                              |
| YMR102C             | None   |                                                                                                                                                                                                                                         |
| YKL093W             | MBR1   | Protein involved in mitochondrial functions and stress response; overexpression suppresses growth defects of hap2, hap3, and hap4 mutants                                                                                               |
| YJL144W             | None   |                                                                                                                                                                                                                                         |
| YKL217W             | JEN1   | Lactate transporter, required for uptake of lactate and pyruvate; expression is derepressed by transcriptional activator Cat8p under nonfermentative growth conditions, and repressed in the presence of glucose, fructose, and mannose |
| YMR086W             | None   |                                                                                                                                                                                                                                         |
| YDR034W-B           | None   |                                                                                                                                                                                                                                         |
| YKR009C             | FOX2   | Multifunctional enzyme of the peroxisomal fatty acid beta-oxidation pathway; has 3-hydroxyacyl-CoA dehydrogenase and enoyl-CoA hydratase activities                                                                                     |
| YOR328W             | PDR10  | ABC (ATP-binding cassette) membrane pump involved in the pleiotropic drug resistance network, regulated by Pdr1p and Pdr3p, similar to Pdr5p                                                                                            |
| YNL194C             | None   |                                                                                                                                                                                                                                         |
| YJL066C             | MPM1   | Mitochondrial membrane protein of unknown function, contains no hydrophobic stretches                                                                                                                                                   |
| YHR139C             | SPS100 | involved in spore development; sporulation-specific wall maturation protein                                                                                                                                                             |
| YPR012W             | None   |                                                                                                                                                                                                                                         |
| YHL032C             | GUT1   | Glycerol kinase, converts glycerol to glycerol-3-phosphate; glucose repression of expression is mediated by Adr1p and Ino2p-Ino4p; derepression of expression on non-fermentable carbon sources is mediated by Opi1p and Rsf1p          |
| YNL237W             | YTP1   | Probable type-III integral membrane protein of unknown function, has regions of similarity to mitochondrial electron transport proteins                                                                                                 |
| YAL053W             | None   |                                                                                                                                                                                                                                         |
| YLR174W             | IDP2   | Cytosolic NADP-specific isocitrate dehydrogenase, catalyzes oxidation of isocitrate to alpha-ketoglutarate; levels are elevated during growth on non-fermentable carbon sources and reduced                                             |

|                              |       |                                                                                                                                                                                                                                                  |
|------------------------------|-------|--------------------------------------------------------------------------------------------------------------------------------------------------------------------------------------------------------------------------------------------------|
|                              |       | during growth on glucose                                                                                                                                                                                                                         |
| YHR096C                      | HXT5  | Hexose transporter with moderate affinity for glucose, may function in accumulation of reserve carbohydrates during stress, expression induced by a decrease in growth rate, contains an extended N-terminal domain relative to other HXTs       |
| YMR175W                      | SIP18 | Protein whose expression is induced by salt                                                                                                                                                                                                      |
| YER096W                      | SHC1  | Sporulation-specific activator of Chs3p (chitin synthase III), required for the synthesis of the chitosan layer of ascospores; has similarity to Skt5p, which activates Chs3p during vegetative growth; transcriptionally induced at alkaline pH |
| YNL117W                      | MLS1  | carbon-catabolite sensitive malate synthase                                                                                                                                                                                                      |
| YDR536W                      | STL1  | sugar transporter-like protein                                                                                                                                                                                                                   |
| YMR107W                      | SPG4  | Protein required for survival at high temperature during stationary phase                                                                                                                                                                        |
| YKL163W                      | PIR3  | Protein containing tandem internal repeats                                                                                                                                                                                                       |
| YML054C                      | CYB2  | Expression is repressed by glucose and anaerobic conditions, is induced by L-lactate and is regulated by GRR1, ROX3, HAP1, HXK2 and CYC8; Cytochrome b2 [L--lactate cytochrome-c oxidoreductase]                                                 |
| YMR081C                      | ISF1  | Serine-rich, hydrophilic protein with similarity to Mbr1p; overexpression suppresses growth defects of hap2, hap3, and hap4 mutants; expression is under glucose control; cotranscribed with NAM7 in a cyp1 mutant                               |
| YDR534C                      | FIT1  | Mannoprotein that is incorporated into the cell wall via a glycosylphosphatidylinositol (GPI) anchor, involved in the retention of siderophore-iron in the cell wall                                                                             |
| YIL055C                      | None  |                                                                                                                                                                                                                                                  |
| YPR030W                      | CSR2  | Nuclear protein with a potential regulatory role in utilization of galactose and nonfermentable carbon sources; overproduction suppresses the lethality at high temperature of a chs5 spa2 double null mutation; potential Cdc28p substrate      |
| YOR348C                      | PUT4  | proline-specific permease (also capable of transporting alanine and glycine); putative proline-specific permease                                                                                                                                 |
| YBR114W                      | RAD16 | Protein that recognizes and binds damaged DNA in an ATP-dependent manner (with Rad7p) during nucleotide excision repair; subunit of Nucleotide Excision Repair Factor 4 (NEF4); member of the SWI/SNF family                                     |
| <b>(12) MODULE 14</b>        |       |                                                                                                                                                                                                                                                  |
| <b>Expression regulators</b> |       |                                                                                                                                                                                                                                                  |
| YGL121C                      | GPG1  | Proposed gamma subunit of the heterotrimeric G protein that interacts with the receptor Grp1p; involved in regulation of pseudohyphal growth; requires Gpb1p or Gpb2p to interact with Gpa2p                                                     |
| YLL019C                      | KNS1  | Nonessential putative protein kinase of unknown cellular role; member of the LAMMER family of protein kinases, which are serine/threonine kinases also capable of phosphorylating tyrosine residues                                              |
| YJR122W                      | CAF17 | Mitochondrial protein that interacts with Ccr4p in the two-hybrid system; 3'-untranslated region contains a putative mRNA localization element common to genes encoding mitochondrial                                                            |

|                            |       |                                                                                                                                                                                                                                                |
|----------------------------|-------|------------------------------------------------------------------------------------------------------------------------------------------------------------------------------------------------------------------------------------------------|
|                            |       | proteins                                                                                                                                                                                                                                       |
| YGR200C                    | ELP2  | Elongator protein, part of the six-subunit RNA polymerase II Elongator histone acetyltransferase complex; target of <i>Kluyveromyces lactis</i> zymocin                                                                                        |
| YNL023C                    | FAP1  | Protein that binds to Fpr1p (FKBP12), conferring rapamycin resistance by competing with rapamycin for Fpr1p binding; has similarity to putative transcription factors, including <i>D. melanogaster</i> shuttle craft and human NFX1           |
| YBL052C                    | SAS3  | Protein involved in silencing at HMR                                                                                                                                                                                                           |
| <b>Genotype regulators</b> |       |                                                                                                                                                                                                                                                |
| M12_659357_674651          |       | YLR257W GSY2(1,6) HSP60(0,6) LCB5(10,6) VPS63(3,0) YPT6(0,13) RBF7 RED1(13,14) YLR264C-A RPS28B(0,5) NEJ1(7,0) PDR8(8,6) BOP2(4,6) SEC22(0,3) YLR269C DCS1(0,4) YLR271W                                                                        |
| <b>Module genes</b>        |       |                                                                                                                                                                                                                                                |
| YOL132W                    | GAS4  | Putative 1,3-beta-glucanosyltransferase, has similarity to Gas1p; localizes to the cell wall                                                                                                                                                   |
| YDR271C                    | None  |                                                                                                                                                                                                                                                |
| YPL194W                    | DDC1  | DNA damage checkpoint protein, part of a PCNA-like complex required for DNA damage response, required for pachytene checkpoint to inhibit cell cycle in response to unrepaired recombination intermediates; potential Cdc28p substrate         |
| YOR356W                    | None  |                                                                                                                                                                                                                                                |
| YDR270W                    | CCC2  | copper-transporting P-type ATPase with similarity to human Menkes and Wilsons genes; Cu(2+)-transporting ATPase                                                                                                                                |
| YJL100W                    | LSB6  | Protein of unknown function; binds Las17p, which is a homolog of human Wiskott-Aldrich Syndrome protein involved in actin patch assembly and actin polymerization                                                                              |
| YPR065W                    | ROX1  | Heme-dependent repressor of hypoxic genes; contains an HMG domain that is responsible for DNA bending activity                                                                                                                                 |
| YJL049W                    | None  |                                                                                                                                                                                                                                                |
| YKR046C                    | PET10 | Protein of unknown function that co-purifies with lipid particles; expression pattern suggests a role in respiratory growth; computational analysis of large-scale protein-protein interaction data suggests a role in ATP/ADP exchange        |
| YLR231C                    | BNA5  | Kynureninase, required for biosynthesis of nicotinic acid from tryptophan via kynurenine pathway                                                                                                                                               |
| YDL174C                    | DLD1  | D-lactate dehydrogenase, oxidizes D-lactate to pyruvate, transcription is heme-dependent, repressed by glucose, and derepressed in ethanol or lactate; located in the mitochondrial inner membrane                                             |
| YAL039C                    | CYC3  | Cytochrome c heme lyase (holocytochrome c synthase), attaches heme to apo-Cyc1p in the mitochondrial intermembrane space; human ortholog may have a role in microphthalmia with linear skin defects (MLS)                                      |
| YEL039C                    | CYC7  | Cytochrome c isoform 2, expressed under hypoxic conditions; electron carrier of the mitochondrial intermembrane space that transfers electrons from ubiquinone-cytochrome c oxidoreductase to cytochrome c oxidase during cellular respiration |

|                              |       |                                                                                                                                                                                                                                                 |
|------------------------------|-------|-------------------------------------------------------------------------------------------------------------------------------------------------------------------------------------------------------------------------------------------------|
| YPR150W                      | None  |                                                                                                                                                                                                                                                 |
| YHR008C                      | SOD2  | Manganese-containing superoxide dismutase                                                                                                                                                                                                       |
| YMR145C                      | NDE1  | None                                                                                                                                                                                                                                            |
| YBL043W                      | ECM13 | Non-essential protein of unknown function                                                                                                                                                                                                       |
| YNL328C                      | MDJ2  | Protein of the mitochondrial inner membrane; function partially overlaps that of Mdj1p, which is a chaperone involved in folding of mitochondrially synthesized proteins in the mitochondrial matrix; member of the DnaJ family                 |
| YJL048C                      | UBX6  | UBX (ubiquitin regulatory X) domain-containing protein that interacts with Cdc48p, transcription is repressed when cells are grown in media containing inositol and choline                                                                     |
| YNL156C                      | NSG2  | Protein of unknown function, potential homolog of mammalian Insig 1                                                                                                                                                                             |
| YMR220W                      | ERG8  | Phosphomevalonate kinase, an essential cytosolic enzyme that acts in the biosynthesis of isoprenoids and sterols, including ergosterol, from mevalonate                                                                                         |
| YER141W                      | COX15 | Protein required for the hydroxylation of heme O to form heme A, which is an essential prosthetic group for cytochrome c oxidase                                                                                                                |
| YBR183W                      | YPC1  | Alkaline ceramidase that also has reverse (CoA-independent) ceramide synthase activity, catalyzes both breakdown and synthesis of phytoceramide; overexpression confers fumonisin B1 resistance                                                 |
| (13) MODULE 15               |       |                                                                                                                                                                                                                                                 |
| <b>Expression regulators</b> |       |                                                                                                                                                                                                                                                 |
| YGL121C                      | GPG1  | Proposed gamma subunit of the heterotrimeric G protein that interacts with the receptor Grp1p; involved in regulation of pseudohyphal growth; requires Gpb1p or Gpb2p to interact with Gpa2p                                                    |
| YJL141C                      | YAK1  | Serine-threonine protein kinase                                                                                                                                                                                                                 |
| YJL005W                      | CYR1  | Required for START A of cell cycle, and glucose and nitrogen repression of sporulation; adenylate cyclase                                                                                                                                       |
| YCR091W                      | KIN82 | Putative serine/threonine protein kinase, most similar to cyclic nucleotide-dependent protein kinase subfamily and the protein kinase C subfamily                                                                                               |
| YIL119C                      | RPI1  | Putative transcriptional regulator; overexpression suppresses the heat shock sensitivity of wild-type RAS2 overexpression and also suppresses the cell lysis defect of an mpk1 mutation                                                         |
| YPL026C                      | SKS1  | multicopy suppressor of snf3 and grr1 mutants; serine/threonine protein kinase homologous to Ran1p                                                                                                                                              |
| YIL101C                      | XBP1  | Transcriptional repressor that binds to promoter sequences of the cyclin genes, CYS3, and SMF2; expression is induced by stress or starvation during mitosis, and late in meiosis; member of the Swi4p/Mbp1p family; potential Cdc28p substrate |
| <b>Module genes</b>          |       |                                                                                                                                                                                                                                                 |
| YGR019W                      | UGA1  | gamma-aminobutyrate (GABA) transaminase (4-aminobutyrate aminotransferase)                                                                                                                                                                      |
| YIL099W                      | SGA1  | Intracellular sporulation-specific glucoamylase involved in glycogen degradation; induced during starvation of a/a diploids late in sporulation, but dispensable for sporulation                                                                |

|           |       |                                                                                                                                                                                                                                                           |
|-----------|-------|-----------------------------------------------------------------------------------------------------------------------------------------------------------------------------------------------------------------------------------------------------------|
| YLR252W   | None  |                                                                                                                                                                                                                                                           |
| YDR070C   | FMP16 | The authentic, non-tagged protein was localized to the mitochondria                                                                                                                                                                                       |
| YDR391C   | None  |                                                                                                                                                                                                                                                           |
| YML070W   | DAK1  | Dihydroxyacetone kinase, required for detoxification of dihydroxyacetone (DHA); involved in stress adaptation                                                                                                                                             |
| YNL200C   | None  |                                                                                                                                                                                                                                                           |
| YDL206W   | None  |                                                                                                                                                                                                                                                           |
| YBR169C   | SSE2  | HSP70 family member, highly homologous to Sse1p                                                                                                                                                                                                           |
| YPR184W   | GDB1  | Glycogen debranching enzyme containing glucanotransferase and alpha-1,6-amyloglucosidase activities, required for glycogen degradation                                                                                                                    |
| YLR178C   | TFS1  | Carboxypeptidase Y inhibitor; (putative) lipid binding protein; suppressor of a cdc25 mutation                                                                                                                                                            |
| YGR088W   | CTT1  | Cytosolic catalase T, has a role in protection from oxidative damage by hydrogen peroxide                                                                                                                                                                 |
| YGR248W   | SOL4  | Protein with similarity to Sol3p                                                                                                                                                                                                                          |
| YHR104W   | GRE3  | Aldose reductase involved in methylglyoxal, d-xylose and arabinose metabolism; stress induced (osmotic, ionic, oxidative, heat shock, starvation and heavy metals); regulated by the HOG pathway                                                          |
| YLR297W   | None  |                                                                                                                                                                                                                                                           |
| YGR053C   | None  |                                                                                                                                                                                                                                                           |
| YMR251W-A | HOR7  | Protein of unknown function; overexpression suppresses Ca <sup>2+</sup> sensitivity of mutants lacking inositol phosphorylceramide mannosyltransferases Csg1p and Csh1p; transcription is induced under hyperosmotic stress and repressed by alpha factor |
| YML128C   | MSC1  | Protein of unknown function, green fluorescent protein (GFP)-fusion protein localizes to the endoplasmic reticulum; msc1 mutants are defective in directing meiotic recombination events to homologous chromatids                                         |
| YER150W   | SPI1  | Protein with similarity to Sed1p; strongly expressed during stationary phase, and transcription is dependent on Msn2p/Msn4p                                                                                                                               |
| YDL048C   | STP4  | Protein involved in pre-tRNA splicing and in uptake of branched-chain amino acids                                                                                                                                                                         |
| YKR049C   | FMP46 | The authentic, non-tagged protein was localized to the mitochondria                                                                                                                                                                                       |
| YNL015W   | PBI2  | Cytosolic inhibitor of vacuolar proteinase B, required for efficient vacuole inheritance; with thioredoxin forms protein complex LMA1, which assists in priming SNARE molecules and promotes vacuole fusion                                               |
| YNL305C   | None  |                                                                                                                                                                                                                                                           |
| YGR201C   | None  |                                                                                                                                                                                                                                                           |
| YPR160W   | GPH1  | Releases glucose-1-phosphate from glycogen; Glycogen phosphorylase                                                                                                                                                                                        |
| YPR098C   | None  |                                                                                                                                                                                                                                                           |
| YKL026C   | GPX1  | Phospholipid hydroperoxide glutathione peroxidase induced by glucose starvation that protects cells from phospholipid hydroperoxides and nonphospholipid peroxides during oxidative                                                                       |



|           |       |                                                                                                                                                                                                                 |
|-----------|-------|-----------------------------------------------------------------------------------------------------------------------------------------------------------------------------------------------------------------|
|           |       | stress                                                                                                                                                                                                          |
| YGR194C   | XKS1  | third enzyme in the xylose pathway; Xylulokinase                                                                                                                                                                |
| YLR177W   | None  |                                                                                                                                                                                                                 |
| YMR025W   | CSI1  | Subunit of the Cop9 signalosome, which is required for deneddylation, or removal of the ubiquitin-like protein Rub1p from Cdc53p (cullin); involved in adaptation to pheromone signaling                        |
| YLL019C   | KNS1  | Nonessential putative protein kinase of unknown cellular role; member of the LAMMER family of protein kinases, which are serine/threonine kinases also capable of phosphorylating tyrosine residues             |
| YCL035C   | GRX1  | Hydroperoxide and superoxide-radical responsive heat-stable glutathione-dependent disulfide oxidoreductase with active site cysteine pair; protects cells from oxidative damage                                 |
| YBR117C   | TKL2  | transketolase, homologous to tk11                                                                                                                                                                               |
| YEL011W   | GLC3  | Glycogen branching enzyme, involved in glycogen accumulation; green fluorescent protein (GFP)-fusion protein localizes to the cytoplasm in a punctate pattern                                                   |
| YKR076W   | ECM4  | Non-essential protein of unknown function; similar to Ygr154cp                                                                                                                                                  |
| YGR052W   | FMP48 | The authentic, non-tagged protein was localized to the mitochondria                                                                                                                                             |
| YPL223C   | GRE1  | Hydrophilin of unknown function; stress induced (osmotic, ionic, oxidative, heat shock and heavy metals); regulated by the HOG pathway                                                                          |
| YLL023C   | None  |                                                                                                                                                                                                                 |
| YNR014W   | None  |                                                                                                                                                                                                                 |
| YNL160W   | YGP1  | may be involved in cellular adaptations prior to stationary phase; YGP1 encodes gp37, a glycoprotein synthesized in response to nutrient limitation which is homologous to the sporulation-specific SPS100 gene |
| YNL274C   | None  |                                                                                                                                                                                                                 |
| YPL123C   | RNY1  | RNAse; member of the T(2) family of endoribonucleases                                                                                                                                                           |
| YKL091C   | None  |                                                                                                                                                                                                                 |
| YMR090W   | None  |                                                                                                                                                                                                                 |
| YMR250W   | GAD1  | Glutamate decarboxylase, converts glutamate into gamma-aminobutyric acid (GABA) during glutamate catabolism; involved in response to oxidative stress                                                           |
| YDL130W-A | STF1  | ATPase stabilizing factor                                                                                                                                                                                       |
| YDR074W   | TPS2  | Trehalose-6-phosphate phosphatase                                                                                                                                                                               |
| YKL151C   | None  |                                                                                                                                                                                                                 |
| YBR285W   | None  |                                                                                                                                                                                                                 |
| YMR272C   | SCS7  | Required for the hydroxylation of the very long chain fatty acid (VLCFA), located in the endoplasmic reticulum; desaturase/hydroxylase enzyme                                                                   |
| YPL230W   | None  |                                                                                                                                                                                                                 |
| YOR178C   | GAC1  | Regulatory subunit for Glc7p (protein phosphatase I) for glycogen synthesis; regulatory role also predicted for glucose repression and ion homeostasis; potential Cdc28p substrate                              |

|         |       |                                                                                                                                                                                                                                                                                                                     |
|---------|-------|---------------------------------------------------------------------------------------------------------------------------------------------------------------------------------------------------------------------------------------------------------------------------------------------------------------------|
| YJR096W | None  |                                                                                                                                                                                                                                                                                                                     |
| YIL136W | OM45  | Protein of unknown function, major constituent of the mitochondrial outer membrane; located on the outer (cytosolic) face of the outer membrane                                                                                                                                                                     |
| YOR289W | None  |                                                                                                                                                                                                                                                                                                                     |
| YJL161W | FMP33 | The authentic, non-tagged protein was localized to the mitochondria                                                                                                                                                                                                                                                 |
| YMR252C | None  |                                                                                                                                                                                                                                                                                                                     |
| YLR258W | GSY2  | Glycogen synthase, similar to Gsy1p; expression induced by glucose limitation, nitrogen starvation, heat shock, and stationary phase; activity regulated by cAMP-dependent, Snf1p and Pho85p kinases as well as by the Gac1p-Glc7p phosphatase                                                                      |
| YDR275W | BSC2  | Protein of unknown function, ORF exhibits genomic organization compatible with a translational readthrough-dependent mode of expression                                                                                                                                                                             |
| YBR126C | TPS1  | Probable regulator of glucose influx into the cell & into glycolytic pathway, indirectly regulating glucose-induced signalling (activation & inactivation) & initial step(s) of glucose metabolism. Homologue of E. coli otsA protein; 56 kD synthase subunit of trehalose-6-phosphate synthase/phosphatase complex |
| YBR230C | None  |                                                                                                                                                                                                                                                                                                                     |
| YPR117W | None  |                                                                                                                                                                                                                                                                                                                     |
| YAL061W | None  |                                                                                                                                                                                                                                                                                                                     |
| YLR270W | DCS1  | Non-essential hydrolase involved in mRNA decapping, may function in a feedback mechanism to regulate deadenylation, contains pyrophosphatase activity and a HIT (histidine triad) motif; interacts with neutral trehalase Nth1p                                                                                     |
| YMR056C | AAC1  | Mitochondrial inner membrane ADP/ATP translocator, exchanges cytosolic ADP for mitochondrially synthesized ATP; Aac1p is a minor isoform while Pet9p is the major ADP/ATP translocator                                                                                                                              |
| YKL142W | MRP8  | Putative mitochondrial ribosomal protein, has similarity to E. coli ribosomal protein S2                                                                                                                                                                                                                            |
| YGL006W | PMC1  | May be involved in depleting cytosol of Ca <sup>2+</sup> ions; putative vacuolar Ca <sup>2+</sup> ATPase                                                                                                                                                                                                            |
| YPL087W | YDC1  | Yeast dihydro-ceramidase; alkaline dihydroceramidase with minor reverse activity.                                                                                                                                                                                                                                   |
| YNL195C | None  |                                                                                                                                                                                                                                                                                                                     |
| YJL017W | None  |                                                                                                                                                                                                                                                                                                                     |
| YMR197C | VTI1  | Involved in cis-Golgi membrane traffic; Vti1p is a v-SNARE that interacts with two t-SNARES, Sed5p and Pep12p                                                                                                                                                                                                       |
| YDR171W | HSP42 | Small cytosolic stress-induced chaperone that forms barrel-shaped oligomers and suppresses the aggregation of non-native proteins; oligomer dissociation is not required for function; involved in cytoskeleton reorganization after heat shock                                                                     |
| YER053C | PIC2  | Mitochondrial phosphate carrier, imports inorganic phosphate into mitochondria; functionally redundant with Mir1p but less abundant than Mir1p under normal conditions; expression is induced at high temperature                                                                                                   |
| YDR533C | HSP31 | Possible chaperone and cysteine protease with similarity to E.                                                                                                                                                                                                                                                      |

|         |       |                                                                                                                                                                                                                                                                            |
|---------|-------|----------------------------------------------------------------------------------------------------------------------------------------------------------------------------------------------------------------------------------------------------------------------------|
|         |       | coli Hsp31 and <i>S. cerevisiae</i> Hsp32p, Hsp33p, and Sno4p; member of the DJ-1/ThiJ/PfpI superfamily, which includes human DJ-1 involved in Parkinson's disease; exists as a dimer                                                                                      |
| YDR453C | TSA2  | Thioredoxin-peroxidase, reduces H <sub>2</sub> O <sub>2</sub> and alkyl hydroperoxides with the use of hydrogens provided by thioredoxin, thioredoxin reductase, and NADPH; provides protection against oxidation systems that generate reactive oxygen and sulfur species |
| YDL204W | RTN2  | reticulon gene member of the RTNLA (reticulon-like A) subfamily                                                                                                                                                                                                            |
| YHR080C | None  |                                                                                                                                                                                                                                                                            |
| YBR286W | APE3  | Vacuolar aminopeptidase Y, processed to mature form by Prb1p                                                                                                                                                                                                               |
| YDR032C | PST2  | Protein of unknown function with similarity to members of a family of flavodoxin-like proteins; induced by oxidative stress in a Yap1p dependent manner; GFP-fusion protein localizes to the cytoplasm in a punctate pattern                                               |
| YMR169C | ALD3  | Aldehyde dehydrogenase that uses NAD <sup>+</sup> as the preferred coenzyme; expression is induced in response to heat shock, oxidative, and osmotic stress                                                                                                                |
| YHR087W | None  |                                                                                                                                                                                                                                                                            |
| YGR043C | None  |                                                                                                                                                                                                                                                                            |
| YPL004C | LSP1  | Long chain base-responsive inhibitor of protein kinases Phk1p and Phk2p, acts along with Pil1p to down-regulate heat stress resistance via regulation of the Pkc1p and Ypk1p pathways; phosphorylated by Phk1p and Phk2p                                                   |
| YMR181C | None  |                                                                                                                                                                                                                                                                            |
| YMR196W | None  |                                                                                                                                                                                                                                                                            |
| YML100W | TSL1  | 123 kD regulatory subunit of trehalose-6-phosphate synthase/phosphatase complex; homologous to TPS3 gene product                                                                                                                                                           |
| YER158C | None  |                                                                                                                                                                                                                                                                            |
| YDL222C | FMP45 | The authentic, non-tagged protein was localized to the mitochondria; cell cortex protein                                                                                                                                                                                   |
| YNL055C | POR1  | Mitochondrial porin (voltage-dependent anion channel), outer membrane protein required for the maintenance of mitochondrial osmotic stability and mitochondrial membrane permeability                                                                                      |
| YOL048C | None  |                                                                                                                                                                                                                                                                            |
| YHR016C | YSC84 | SH3 domain in C-terminus                                                                                                                                                                                                                                                   |
| YGR070W | ROM1  | GDP/GTP exchange protein (GEP) for Rho1p; mutations are synthetically lethal with mutations in rom2, which also encodes a GEP                                                                                                                                              |
| YFL030W | AGX1  | Alanine : glyoxylate aminotransferase, catalyzes the synthesis of glycine from glyoxylate, which is one of three pathways for glycine biosynthesis in yeast; has similarity to mammalian and plant alanine : glyoxylate aminotransferases                                  |
| YFL014W | HSP12 | Plasma membrane localized protein that protects membranes from desiccation; induced by heat shock, oxidative stress, osmotic stress, stationary phase entry, glucose depletion, oleate and alcohol; regulated by the HOG and Ras-Pka pathways                              |

|           |       |                                                                                                                                                                                                                     |
|-----------|-------|---------------------------------------------------------------------------------------------------------------------------------------------------------------------------------------------------------------------|
| YNL115C   | None  |                                                                                                                                                                                                                     |
| YIL155C   | GUT2  | Mitochondrial glycerol-3-phosphate dehydrogenase; expression is repressed by both glucose and cAMP and derepressed by non-fermentable carbon sources in a Snf1p, Rsf1p, Hap2/3/4/5 complex dependent manner         |
| YIL113W   | SDP1  | None                                                                                                                                                                                                                |
| YPR026W   | ATH1  | Vacuolar acid trehalase, required for trehalose utilization                                                                                                                                                         |
| YOL083W   | None  |                                                                                                                                                                                                                     |
| YLR251W   | SYM1  | Protein homologous to mammalian peroxisomal membrane protein Mpv17; required for ethanol metabolism and induced by heat shock; localized to the inner mitochondrial membrane                                        |
| YGL037C   | PNC1  | NAD(+) salvage pathway gene; pyrazinamidase and nicotinamidase                                                                                                                                                      |
| YMR148W   | None  |                                                                                                                                                                                                                     |
| YGL156W   | AMS1  | vacuolar alpha mannosidase                                                                                                                                                                                          |
| YER054C   | GIP2  | Putative regulatory subunit of the protein phosphatase Glc7p, proposed to be involved in glycogen metabolism; contains a conserved motif (GVNK motif) that is also found in Gac1p, Pig1p, and Pig2p                 |
| YMR041C   | None  |                                                                                                                                                                                                                     |
| YMR105C   | PGM2  | Phosphoglucomutase                                                                                                                                                                                                  |
| YPL186C   | UIP4  | Protein of unknown function                                                                                                                                                                                         |
| YIR016W   | None  |                                                                                                                                                                                                                     |
| YMR297W   | PRC1  | Vacuolar carboxypeptidase Y (proteinase C), involved in protein degradation in the vacuole and required for full protein degradation during sporulation                                                             |
| YIL107C   | PFK26 | 6-phosphofructo-2-kinase, inhibited by phosphoenolpyruvate and sn-glycerol 3-phosphate, has negligible fructose-2,6-bisphosphatase activity, transcriptional regulation involves protein kinase A                   |
| YGR044C   | RME1  | mediates cell type control of sporulation; negatively regulates IME1 and sporulation; zinc finger protein; negative regulator of meiosis; directly repressed by a1-a2 regulator                                     |
| YOL085C   | None  |                                                                                                                                                                                                                     |
| YIR038C   | GTT1  | ER associated glutathione S-transferase capable of homodimerization; expression induced during the diauxic shift and throughout stationary phase; functional overlap with Gtt2p, Grx1p, and Grx2p                   |
| YOL053C-A | None  |                                                                                                                                                                                                                     |
| YDL021W   | GPM2  | Similar to GPM1 (phosphoglycerate mutase); converts 3-phosphoglycerate to 2-phosphoglycerate in glycolysis; phosphoglycerate mutase, involved in glycolysis                                                         |
| YDL223C   | HBT1  | Substrate of the Hub1p ubiquitin-like protein that localizes to the shmoo tip (mating projection); mutants are defective for mating projection formation, thereby implicating Hbt1p in polarized cell morphogenesis |
| YGR008C   | STF2  | ATPase stabilizing factor                                                                                                                                                                                           |
| YOL153C   | None  |                                                                                                                                                                                                                     |
| YGR143W   | SKN1  | Involved in (1->6)-beta-glucan biosynthesis; encodes a predicted                                                                                                                                                    |

|                              |        |                                                                                                                                                                                                                                               |
|------------------------------|--------|-----------------------------------------------------------------------------------------------------------------------------------------------------------------------------------------------------------------------------------------------|
|                              |        | type II membrane protein highly homologous to Kre6p                                                                                                                                                                                           |
| YDR001C                      | NTH1   | Neutral trehalase, degrades trehalose; required for thermotolerance and may mediate resistance to other cellular stresses; may be phosphorylated by Cdc28p                                                                                    |
| YPL154C                      | PEP4   | Vacuolar aspartyl protease (proteinase A), required for the posttranslational precursor maturation of vacuolar proteinases; synthesized as a zymogen, self-activates                                                                          |
| YMR170C                      | ALD2   | Cytosolic aldehyde dehydrogenase that uses NAD <sup>+</sup> as the preferred coenzyme; expression is induced in response to high osmotic stress                                                                                               |
| <b>(14) MODULE 16</b>        |        |                                                                                                                                                                                                                                               |
| <b>Expression regulators</b> |        |                                                                                                                                                                                                                                               |
| YIR017C                      | MET28  | Transcriptional activator in the Cbf1p-Met4p-Met28p complex, participates in the regulation of sulfur metabolism                                                                                                                              |
| YFR009W                      | GCN20  | Positive regulator of the Gcn2p kinase activity, forms a complex with Gcn1p; proposed to stimulate Gcn2p activation by an uncharged tRNA                                                                                                      |
| YNL305C                      | None   |                                                                                                                                                                                                                                               |
| YLR150W                      | STM1   | Protein that binds quadruplex nucleic acids; multicopy suppressor of tom1 and pop2 mutations; acts with Cdc13p to maintain telomere structure                                                                                                 |
| YDR277C                      | MTH1   | Negative regulator of the glucose-sensing signal transduction pathway, required for repression of transcription by Rgt1p; interacts with Rgt1p and the Snf3p and Rgt2p glucose sensors; phosphorylated by Yck1p, triggering Mth1p degradation |
| YGR123C                      | PPT1   | Protein serine/threonine phosphatase with similarity to human phosphatase PP5; present in both the nucleus and cytoplasm; expressed during logarithmic growth                                                                                 |
| YGR070W                      | ROM1   | GDP/GTP exchange protein (GEP) for Rho1p; mutations are synthetically lethal with mutations in rom2, which also encodes a GEP                                                                                                                 |
| <b>Module genes</b>          |        |                                                                                                                                                                                                                                               |
| YNL010W                      | None   |                                                                                                                                                                                                                                               |
| YPR069C                      | SPE3   | biosynthesis of spermidine; putrescine aminopropyltransferase (spermidine synthase)                                                                                                                                                           |
| YMR012W                      | CLU1   | CLU1 is similar to the Dictyostelium cluA gene; translation initiation factor eIF3 subunit                                                                                                                                                    |
| YDL096C                      | None   |                                                                                                                                                                                                                                               |
| YOR239W                      | ABP140 | Nonessential protein that binds actin filaments and localizes to actin patches and cables, has similarity to S-adenosylmethionine (AdoMet)-dependent methyltransferases                                                                       |
| YER043C                      | SAH1   | Putative S-adenosyl-L-homocysteine hydrolase with a probable role in S-adenosylhomocysteine catabolism and/or methionine degradation                                                                                                          |
| YER003C                      | PMI40  | catalyzes the interconversion of fructose-6-P and mannose-6-P; mannose-6-phosphate isomerase                                                                                                                                                  |
| YMR186W                      | HSC82  | constitutively expressed heat shock protein                                                                                                                                                                                                   |
| YAL005C                      | SSA1   | Stress-seventy subfamily A; Heat shock protein of HSP70 family, cytoplasmic                                                                                                                                                                   |
| YOR198C                      | BFR1   | Component of mRNP complexes associated with                                                                                                                                                                                                   |

|           |       |                                                                                                                                                                                                                                                  |
|-----------|-------|--------------------------------------------------------------------------------------------------------------------------------------------------------------------------------------------------------------------------------------------------|
|           |       | polyribosomes; implicated in secretion and nuclear segregation; multicopy suppressor of BFA (Brefeldin A) sensitivity                                                                                                                            |
| YIL076W   | SEC28 | Part of a heptameric protein complex that regulates retrograde Golgi-to-ER protein traffic in eukaryotic cells; coatomer forms the COP I vesicle coat whose functions are essential; epsilon-COP coatomer subunit Sec28p                         |
| YAL004W   | None  |                                                                                                                                                                                                                                                  |
| YLR301W   | None  |                                                                                                                                                                                                                                                  |
| YOL141W   | PPM2  | Putative carboxyl methyl transferase, has similarity to Ppm1p but biochemical activity not yet demonstrated                                                                                                                                      |
| YFL037W   | TUB2  | Beta-tubulin; associates with alpha-tubulin (Tub1p and Tub3p) to form tubulin dimer, which polymerizes to form microtubules                                                                                                                      |
| YNR016C   | ACC1  | Acetyl-CoA carboxylase, biotin containing enzyme that catalyzes the carboxylation of acetyl-CoA to form malonyl-CoA; required for de novo biosynthesis of long-chain fatty acids                                                                 |
| YDL084W   | SUB2  | Suppresses the cold-sensitive snRNP biogenesis brr1-1 mutation; RNA helicase                                                                                                                                                                     |
| YGR087C   | PDC6  | Minor isoform of pyruvate decarboxylase, key enzyme in alcoholic fermentation, decarboxylates pyruvate to acetaldehyde, regulation is glucose- and ethanol-dependent, involved in amino acid catabolism                                          |
| YPL240C   | HSP82 | Cytoplasmic chaperone (Hsp90 family) required for pheromone signaling and negative regulation of Hsf1p; docks with the mitochondrial import receptor Tom70p for preprotein delivery; interacts with co-chaperones Cns1p, Cpr6p, Cpr7p, and Sti1p |
| YLL024C   | SSA2  | member of 70 kDa heat shock protein family                                                                                                                                                                                                       |
| YJL105W   | SET4  | None                                                                                                                                                                                                                                             |
| YHR042W   | NCP1  | NADP-cytochrome P450 reductase                                                                                                                                                                                                                   |
| YMR307W   | GAS1  | Beta-1,3-glucanosyltransferase, required for cell wall assembly; localizes to the cell surface via a glycosylphosphatidylinositol (GPI) anchor                                                                                                   |
| YOR181W   | LAS17 | Actin assembly factor, activates the Arp2/3 protein complex that nucleates branched actin filaments; localizes with the Arp2/3 complex to actin patches; homolog of the human Wiskott-Aldrich syndrome protein (WASP)                            |
| YER087C-A | None  |                                                                                                                                                                                                                                                  |
| YLR134W   | PDC5  | Minor isoform of pyruvate decarboxylase, key enzyme in alcoholic fermentation, decarboxylates pyruvate to acetaldehyde, regulation is glucose- and ethanol-dependent, repressed by thiamine, involved in amino acid catabolism                   |
| YMR215W   | GAS3  | Putative 1,3-beta-glucanosyltransferase, has similarity to Gas1p; localizes to the cell wall                                                                                                                                                     |
| YHR183W   | GND1  | 6-phosphogluconate dehydrogenase, decarboxylating; converts 6-phosphogluconate + NADP to ribulose-5-phosphate + NADPH + CO <sub>2</sub> ; Phosphogluconate Dehydrogenase (Decarboxylating)                                                       |
| YGL077C   | HNM1  | Choline transporter (permease) that also controls the uptake of nitrogen mustard; expression is co-regulated with phospholipid biosynthetic genes and negatively regulated by choline and myo-inositol                                           |

|                              |       |                                                                                                                                                                                                                                  |
|------------------------------|-------|----------------------------------------------------------------------------------------------------------------------------------------------------------------------------------------------------------------------------------|
| YAL023C                      | PMT2  | Transfers mannosyl residues from dolichyl phosphate-D-mannose to seryl and threonyl residues in proteins; acts in complex with Pmt1p; dolichyl phosphate-D-mannose:protein O-D-mannosyltransferase                               |
| YAL038W                      | CDC19 | Pyruvate kinase, functions as a homotetramer in glycolysis to convert phosphoenolpyruvate to pyruvate, the input for aerobic (TCA cycle) or anaerobic (glucose fermentation) respiration                                         |
| YGR240C                      | PFK1  | Alpha subunit of heterooctameric phosphofructokinase involved in glycolysis, indispensable for anaerobic growth, activated by fructose-2,6-bisphosphate and AMP, mutation inhibits glucose induction of cell cycle-related genes |
| YJR105W                      | ADO1  | adenosine kinase                                                                                                                                                                                                                 |
| YDR502C                      | SAM2  | S-adenosylmethionine synthetase, catalyzes transfer of the adenosyl group of ATP to the sulfur atom of methionine; one of two differentially regulated isozymes (Sam1p and Sam2p)                                                |
| YJR143C                      | PMT4  | Transfers mannose residues from dolichyl phosphate-D-mannose to specific serine/threonine residues of proteins in the secretory pathway; dolichyl phosphate-D-mannose:protein O-D-mannosyltransferase                            |
| YLR378C                      | SEC61 | membrane component of ER protein translocation apparatus                                                                                                                                                                         |
| (15) MODULE 17               |       |                                                                                                                                                                                                                                  |
| <b>Expression regulators</b> |       |                                                                                                                                                                                                                                  |
| YMR001C                      | CDC5  | Polo-like kinase with similarity to Xenopus Plx1 and S. pombe Plo1p; found at bud neck, nucleus and SPBs; has multiple functions in mitosis and cytokinesis through phosphorylation of substrates; may be a Cdc28p substrate     |
| YJR094C                      | IME1  | Master regulator of meiosis that is active only during meiotic events, activates transcription of early meiotic genes through interaction with Ume6p, degraded by the 26S proteasome following phosphorylation by Ime2p          |
| YJL089W                      | SIP4  | Possibly involved in Snf1p regulated transcriptional activation; shows homology to DNA binding domain of Gal4p, has a leucine zipper motif and acidic region; lexA-Sip4p activates transcription                                 |
| <b>Module genes</b>          |       |                                                                                                                                                                                                                                  |
| YLR286C                      | CTS1  | Endochitinase, required for cell separation after mitosis; transcriptional activation during late G and early M cell cycle phases is mediated by transcription factor Ace2p                                                      |
| YJR160C                      | MPH3  | Alpha-glucoside permease, transports maltose, maltotriose, alpha-methylglucoside, and turanose; identical to Mph2p; encoded in a subtelomeric position in a region likely to have undergone duplication                          |
| YJR159W                      | SOR1  | Sorbitol dehydrogenase; expression is induced in the presence of sorbitol                                                                                                                                                        |
| YDL247W                      | MPH2  | Alpha-glucoside permease, transports maltose, maltotriose, alpha-methylglucoside, and turanose; identical to Mph3p; encoded in a subtelomeric position in a region likely to have undergone duplication                          |
| YLR339C                      | None  |                                                                                                                                                                                                                                  |
| YGL035C                      | MIG1  | Transcription factor involved in glucose repression; C2H2 zinc                                                                                                                                                                   |

|                              |       |                                                                                                                                                                                                                                               |
|------------------------------|-------|-----------------------------------------------------------------------------------------------------------------------------------------------------------------------------------------------------------------------------------------------|
|                              |       | finger protein which resembles the mammalian Egr and Wilms tumour proteins                                                                                                                                                                    |
| YJL217W                      | None  |                                                                                                                                                                                                                                               |
| YML093W                      | UTP14 | Nucleolar protein, component of the small subunit (SSU) processome containing the U3 snoRNA that is involved in processing of pre-18S rRNA                                                                                                    |
| YDR280W                      | RRP45 | Ribosomal RNA Processing; Putative 3'->5' exoribonuclease; component of exosome complex of 3'->5' exonucleases                                                                                                                                |
| <b>(16) MODULE 18</b>        |       |                                                                                                                                                                                                                                               |
| <b>Expression regulators</b> |       |                                                                                                                                                                                                                                               |
| YBL084C                      | CDC27 | Subunit of the Anaphase-Promoting Complex/Cyclosome (APC/C), which is a ubiquitin-protein ligase required for degradation of anaphase inhibitors, including mitotic cyclins, during the metaphase/anaphase transition                         |
| YDL064W                      | UBC9  | SUMO-conjugating enzyme involved in the Smt3p conjugation pathway; nuclear protein required for S- and M-phase cyclin degradation and mitotic control; involved in proteolysis mediated by the anaphase-promoting complex cyclosome (APCC)    |
| YDR277C                      | MTH1  | Negative regulator of the glucose-sensing signal transduction pathway, required for repression of transcription by Rgt1p; interacts with Rgt1p and the Snf3p and Rgt2p glucose sensors; phosphorylated by Yck1p, triggering Mth1p degradation |
| YMR036C                      | MIH1  | S. pombe cdc25+ homolog; homolog of S. pombe cdc25                                                                                                                                                                                            |
| <b>Module genes</b>          |       |                                                                                                                                                                                                                                               |
| YNR033W                      | ABZ1  | Para-aminobenzoate (PABA) synthase, has similarity to Escherichia coli PABA synthase components PabA and PabB                                                                                                                                 |
| YDR193W                      | None  |                                                                                                                                                                                                                                               |
| YBR277C                      | None  |                                                                                                                                                                                                                                               |
| YPL046C                      | ELC1  | Elongin C, forms heterodimer with Ela1p that participates in transcription elongation; expression dramatically upregulated during sporulation; widely conserved among eukaryotes                                                              |
| YGL230C                      | None  |                                                                                                                                                                                                                                               |
| YHR032W                      | None  |                                                                                                                                                                                                                                               |
| YIR033W                      | MGA2  | ER membrane protein involved, with its homolog Spt23p, in regulation of OLE1 transcription; inactive ER form dimerizes and one subunit is then activated by ubiquitin/proteasome-dependent processing followed by nuclear targeting           |
| YJR156C                      | THI11 | Protein involved in synthesis of the thiamine precursor hydroxymethylpyrimidine (HMP); member of a subtelomeric gene family including THI5, THI11, THI12, and THI13                                                                           |
| YML013C-A                    | None  |                                                                                                                                                                                                                                               |
| YFR032C                      | None  |                                                                                                                                                                                                                                               |
| YDL163W                      | None  |                                                                                                                                                                                                                                               |
| YGR113W                      | DAM1  | Component of the DASH complex, localized to intranuclear spindles and spindle pole bodies; interacts with Duo1p and Mps1p; key Ip11p target for regulating kinetochore-microtubule attachments                                                |
| YJL091C                      | GWT1  | Protein involved in the inositol acylation of glucosaminyl                                                                                                                                                                                    |



|                              |        |                                                                                                                                                                                                                                                          |
|------------------------------|--------|----------------------------------------------------------------------------------------------------------------------------------------------------------------------------------------------------------------------------------------------------------|
|                              |        | phosphatidylinositol (GlcN-PI) to form glucosaminyl(acyl)phosphatidylinositol (GlcN(acyl)PI), an intermediate in the biosynthesis of glycosylphosphatidylinositol (GPI) anchors                                                                          |
| YKL076C                      | PSY1   | Dubious open reading frame, unlikely to encode a protein; not conserved in closely related <i>Saccharomyces</i> species; 69% of ORF overlaps the uncharacterized ORF YKL075C                                                                             |
| (17) MODULE 20               |        |                                                                                                                                                                                                                                                          |
| <b>Expression regulators</b> |        |                                                                                                                                                                                                                                                          |
| YJL098W                      | SAP185 | Protein that forms a complex with the Sit4p protein phosphatase and is required for its function; member of a family of similar proteins including Sap4p, Sap155p, and Sap190p                                                                           |
| YIR026C                      | YVH1   | nitrogen starvation-induced protein phosphatase                                                                                                                                                                                                          |
| YGL248W                      | PDE1   | Low-affinity cyclic AMP phosphodiesterase, controls glucose and intracellular acidification-induced cAMP signaling, target of the cAMP-protein kinase A (PKA) pathway; glucose induces transcription and inhibits translation                            |
| YPL203W                      | TPK2   | Involved in nutrient control of cell growth and division; cAMP-dependent protein kinase catalytic subunit                                                                                                                                                |
| YGL158W                      | RCK1   | Serine/threonine protein kinase                                                                                                                                                                                                                          |
| YNR054C                      | ESF2   | Protein required for cell viability                                                                                                                                                                                                                      |
| YDR496C                      | PUF6   | member of the PUF protein family; YDR496C                                                                                                                                                                                                                |
| <b>Module genes</b>          |        |                                                                                                                                                                                                                                                          |
| YOR106W                      | VAM3   | Syntaxin-related protein; required for vacuolar assembly; PEP12 homolog; member of the syntaxin family of proteins; predicted C-terminal TMD                                                                                                             |
| YNL303W                      | None   |                                                                                                                                                                                                                                                          |
| YDR339C                      | None   |                                                                                                                                                                                                                                                          |
| YDR161W                      | None   |                                                                                                                                                                                                                                                          |
| YDR179C                      | CSN9   | Subunit of the Cop9 signalosome, which is required for deneddylation, or removal of the ubiquitin-like protein Rub1p from Cdc53p (cullin); involved in adaptation to pheromone signaling                                                                 |
| YGL029W                      | CGR1   | Coiled-coil protein that may contribute to compartmentalization of nucleolar constituents; expression is growth-regulated                                                                                                                                |
| YPL266W                      | DIM1   | Essential 18S rRNA dimethylase, responsible for conserved m6(2)Am6(2)A dimethylation in 3'-terminal loop of 18 S rRNA, part of 90S and 40S pre-particles in nucleolus, involved in pre-ribosomal RNA processing                                          |
| YIL149C                      | MLP2   | Mlp proteins restrict telomere length by influencing the Rif1-Tel1 pathway of telomerase regulation; also involved in the translocation of macromolecules between the nucleoplasm and the NPC; coiled-coil protein (putative), similar to myosin and TPR |
| YKL110C                      | KTI12  | Protein associated with the RNA polymerase II Elongator complex; involved in sensitivity to G1 arrest induced by <i>Kluyveromyces lactis</i> toxin, zymocin                                                                                              |
| YDR334W                      | SWR1   | Swi2/Snf2-related ATPase, component of the SWR1 complex; required for the incorporation of Htz1p into chromatin                                                                                                                                          |

|         |       |                                                                                                                                                                                                                                              |
|---------|-------|----------------------------------------------------------------------------------------------------------------------------------------------------------------------------------------------------------------------------------------------|
| YIL092W | None  |                                                                                                                                                                                                                                              |
| YOL095C | HMI1  | Mitochondrial inner membrane localized ATP-dependent DNA helicase, required for the maintenance of the mitochondrial genome; not required for mitochondrial transcription                                                                    |
| YDR527W | RBA50 | Protein required for cell viability                                                                                                                                                                                                          |
| YLR002C | NOC3  | Protein that forms a nuclear complex with Noc2p that binds to 66S ribosomal precursors to mediate their intranuclear transport; also binds to chromatin to promote the association of DNA replication factors and replication initiation     |
| YIL064W | None  |                                                                                                                                                                                                                                              |
| YHR066W | SSF1  | putative involvement in mating; homologous to Ssf2p                                                                                                                                                                                          |
| YDR195W | REF2  | RNA-binding protein involved in the cleavage step of mRNA 3'-end formation prior to polyadenylation; also involved in snoRNA maturation                                                                                                      |
| YOR342C | None  |                                                                                                                                                                                                                                              |
| YMR014W | BUD22 | Protein involved in bud-site selection; diploid mutants display a random budding pattern instead of the wild-type bipolar pattern                                                                                                            |
| YDR110W | FOB1  | Nucleolar protein required for DNA replication fork blocking and recombinational hotspot activities; binds to the replication fork barrier site in the rDNA region; related to retroviral integrases                                         |
| YER161C | SPT2  | Protein involved in negative regulation of transcription, exhibits regulated interactions with both histones and SWI-SNF components, has similarity to mammalian HMG1 proteins                                                               |
| YDL121C | None  |                                                                                                                                                                                                                                              |
| YAL033W | POP5  | Subunit of both RNase MRP, which cleaves pre-rRNA, and nuclear RNase P, which cleaves tRNA precursors to generate mature 5' ends                                                                                                             |
| YDR075W | PPH3  | Catalytic subunit of protein phosphatase; involved in activation of Gln3p, which is a transcription factor with a role in nitrogen utilization                                                                                               |
| YML060W | OGG1  | Mitochondrial glycosylase/lyase that specifically excises 7,8-dihydro-8-oxoguanine residues located opposite cytosine or thymine residues in DNA, repairs oxidative damage to mitochondrial DNA                                              |
| YDL166C | FAP7  | Essential nuclear protein, involved in the oxidative stress response                                                                                                                                                                         |
| YDL158C | None  |                                                                                                                                                                                                                                              |
| YHR144C | DCD1  | Deaminase required for dCTP and dTTP synthesis; expression is cell cycle regulated                                                                                                                                                           |
| YLR003C | None  |                                                                                                                                                                                                                                              |
| YNL186W | UBP10 | Ubiquitin-specific protease that deubiquitinates ubiquitin-protein moieties; may regulate silencing by acting on Sir4p; involved in posttranscriptionally regulating Gap1p and possibly other transporters; primarily located in the nucleus |
| YNL231C | PDR16 | Phosphatidylinositol transfer protein (PITP) controlled by the multiple drug resistance regulator Pdr1p, localizes to lipid particles and microsomes, controls levels of various lipids, may regulate lipid synthesis, homologous to Pdr17p  |
| YGR272C | None  |                                                                                                                                                                                                                                              |

|                              |       |                                                                                                                                                                                                                                                 |
|------------------------------|-------|-------------------------------------------------------------------------------------------------------------------------------------------------------------------------------------------------------------------------------------------------|
| YPL111W                      | CAR1  | arginase                                                                                                                                                                                                                                        |
| YDL129W                      | None  |                                                                                                                                                                                                                                                 |
| YDR045C                      | RPC11 | RNA polymerase III subunit C11; mediates pol III RNA cleavage activity and is important for termination of transcription                                                                                                                        |
| YDR526C                      | None  |                                                                                                                                                                                                                                                 |
| YHL012W                      | None  |                                                                                                                                                                                                                                                 |
| YDR412W                      | None  |                                                                                                                                                                                                                                                 |
| YCL036W                      | GFD2  | Protein of unknown function, identified as a high-copy suppressor of a dbp5 mutation                                                                                                                                                            |
| YNL150W                      | None  |                                                                                                                                                                                                                                                 |
| YHR184W                      | SSP1  | Protein involved in the control of meiotic nuclear division and spore formation                                                                                                                                                                 |
| YOR051C                      | None  |                                                                                                                                                                                                                                                 |
| YGR251W                      | None  |                                                                                                                                                                                                                                                 |
| YPR143W                      | RRP15 | Essential protein involved in pre-rRNA processing                                                                                                                                                                                               |
| YNL191W                      | None  |                                                                                                                                                                                                                                                 |
| YHR041C                      | SRB2  | RNA polymerase II holoenzyme/mediator subunit                                                                                                                                                                                                   |
| <b>(18) MODULE 21</b>        |       |                                                                                                                                                                                                                                                 |
| <b>Expression regulators</b> |       |                                                                                                                                                                                                                                                 |
| YPL153C                      | RAD53 | Protein kinase, required for cell-cycle arrest in response to DNA damage; activated by trans autophosphorylation when interacting with hyperphosphorylated Rad9p                                                                                |
| YMR001C                      | CDC5  | Polo-like kinase with similarity to <i>Xenopus</i> Plx1 and <i>S. pombe</i> Plo1p; found at bud neck, nucleus and SPBs; has multiple functions in mitosis and cytokinesis through phosphorylation of substrates; may be a Cdc28p substrate      |
| YDL101C                      | DUN1  | Cell-cycle checkpoint serine-threonine kinase required for DNA damage-induced transcription of certain target genes, phosphorylation of Rad55p and Sml1p, and transient G2/M arrest after DNA damage; also regulates postreplicative DNA repair |
| <b>Module genes</b>          |       |                                                                                                                                                                                                                                                 |
| YPL233W                      | NSL1  | Essential component of the MIND kinetochore complex (Mtw1p Including Nnf1p-Nsl1p-Dsn1p) which joins kinetochore subunits contacting DNA to those contacting microtubules; required for accurate chromosome segregation                          |
| YPR194C                      | OPT2  | Oligopeptide transporter; member of the OPT family, with potential orthologs in <i>S. pombe</i> and <i>C. albicans</i>                                                                                                                          |
| YCL074W                      | None  |                                                                                                                                                                                                                                                 |
| YIL057C                      | None  |                                                                                                                                                                                                                                                 |
| YJL154C                      | VPS35 | Protein involved in vacuolar sorting; retromer complex component                                                                                                                                                                                |
| YCR022C                      | None  |                                                                                                                                                                                                                                                 |
| YML111W                      | BUL2  | a homologue of BUL1; (putative) ubiquitin-mediated protein degradation                                                                                                                                                                          |
| YPL164C                      | MLH3  | MutL Homolog; MutL Homolog                                                                                                                                                                                                                      |
| YML061C                      | PIF1  | involved in repair and recombination of mitochondrial DNA;                                                                                                                                                                                      |

|                              |        |                                                                                                                                                                                                                                                  |
|------------------------------|--------|--------------------------------------------------------------------------------------------------------------------------------------------------------------------------------------------------------------------------------------------------|
|                              |        | also plays a role in (nuclear) chromosomal telomere formation and elongation; 5' to 3' DNA helicase                                                                                                                                              |
| YHR056C                      | RSC30  | RSC complex component                                                                                                                                                                                                                            |
| YKL032C                      | IXR1   | Protein that binds DNA containing intrastrand cross-links formed by cisplatin, contains two HMG (high mobility group box) domains, which confer the ability to bend cisplatin-modified DNA; mediates aerobic transcriptional repression of COX5b |
| YJL179W                      | PF1D1  | Subunit of heterohexameric prefoldin, which binds cytosolic chaperonin and transfers target proteins to it; involved in the biogenesis of actin and of alpha- and gamma-tubulin                                                                  |
| YDR514C                      | None   |                                                                                                                                                                                                                                                  |
| YPL204W                      | HRR25  | Similar to YCK1 and YCK2, two other casein kinase I isoforms; found primarily in nucleus; may be involved in DNA-damage repair; casein kinase I isoform                                                                                          |
| <b>(19) MODULE 22</b>        |        |                                                                                                                                                                                                                                                  |
| <b>Expression regulators</b> |        |                                                                                                                                                                                                                                                  |
| YFR009W                      | GCN20  | Positive regulator of the Gcn2p kinase activity, forms a complex with Gcn1p; proposed to stimulate Gcn2p activation by an uncharged tRNA                                                                                                         |
| YJL089W                      | SIP4   | Possibly involved in Snf1p regulated transcriptional activation; shows homology to DNA binding domain of Gal4p, has a leucine zipper motif and acidic region; LexA-Sip4p activates transcription                                                 |
| YOR337W                      | TEA1   | Mutants are defective in Ty1 Enhancer-mediated Activation; Ty1 enhancer activator                                                                                                                                                                |
| YGR156W                      | PTI1   | Pta1p Interacting protein                                                                                                                                                                                                                        |
| YDR283C                      | GCN2   | Protein kinase, phosphorylates the alpha-subunit of translation initiation factor eIF2 (Sui2p) in response to starvation; activated by uncharged tRNAs and the Gcn1p-Gcn20p complex                                                              |
| YBR073W                      | RDH54  | genetic interaction with DMC1; Putative helicase similar to RAD54                                                                                                                                                                                |
| YJL098W                      | SAP185 | Protein that forms a complex with the Sit4p protein phosphatase and is required for its function; member of a family of similar proteins including Sap4p, Sap155p, and Sap190p                                                                   |
| <b>Module genes</b>          |        |                                                                                                                                                                                                                                                  |
| YCR088W                      | ABP1   | Actin-binding protein of the cortical actin cytoskeleton, important for activation of the Arp2/3 complex that plays a key role actin in cytoskeleton organization                                                                                |
| YPR035W                      | GLN1   | Glutamine synthetase (GS), synthesizes glutamine from glutamate and ammonia; with Glt1p, forms the secondary pathway for glutamate biosynthesis from ammonia; expression regulated by nitrogen source and by amino acid limitation               |
| YGL012W                      | ERG4   | C-24(28) sterol reductase, catalyzes the final step in ergosterol biosynthesis; mutants are viable, but lack ergosterol                                                                                                                          |
| YFR006W                      | None   |                                                                                                                                                                                                                                                  |
| YFR044C                      | None   |                                                                                                                                                                                                                                                  |
| YCR013C                      | None   |                                                                                                                                                                                                                                                  |
| YDL160C                      | DHH1   | Cytoplasmic DExD/H-box helicase, stimulates mRNA decapping, coordinates distinct steps in mRNA function and                                                                                                                                      |

|         |        |                                                                                                                                                                                                                                              |
|---------|--------|----------------------------------------------------------------------------------------------------------------------------------------------------------------------------------------------------------------------------------------------|
|         |        | decay, interacts with both the decapping and deadenylase complexes, may have a role in mRNA export and translation                                                                                                                           |
| YNL088W | TOP2   | Essential type II topoisomerase, catalyzes topology changes in DNA via transient breakage and rejoining of phosphodiester bonds in the DNA backbone; localizes to axial cores in meiosis                                                     |
| YKL153W | None   |                                                                                                                                                                                                                                              |
| YIL123W | SIM1   | (putative) involved in control of DNA replication                                                                                                                                                                                            |
| YCR012W | PGK1   | 3-phosphoglycerate kinase                                                                                                                                                                                                                    |
| YHL030W | ECM29  | Major component of the proteasome; tethers the proteasome core particle to the regulatory particle, and enhances the stability of the proteasome                                                                                             |
| YDL100C | ARR4   | ATPase, involved in resistance to heat and metal stress, active as a dimer; normally localized to the cytosol, but appears to localize to late endosomes under stress conditions                                                             |
| YML085C | TUB1   | Alpha-tubulin; associates with beta-tubulin (Tub2p) to form tubulin dimer, which polymerizes to form microtubules                                                                                                                            |
| YKL182W | FAS1   | Beta subunit of fatty acid synthetase, which catalyzes the synthesis of long-chain saturated fatty acids; contains acetyltransacylase, dehydratase, enoyl reductase, malonyl transacylase, and palmitoyl transacylase activities             |
| YJR103W | URA8   | Last step in pyrimidine biosynthesis pathway; CTP synthase                                                                                                                                                                                   |
| YOL002C | IZH2   | Membrane protein involved in zinc metabolism, member of the four-protein IZH family, direct target of the Zap1p transcription factor, expression induced by zinc deficiency and fatty acids, deletion increases sensitivity to elevated zinc |
| YNL058C | None   |                                                                                                                                                                                                                                              |
| YMR076C | PDS5   | Protein required for establishment and maintenance of sister chromatid condensation and cohesion, colocalizes with cohesin on chromosomes in an interdependent manner, may function as a protein-protein interaction scaffold                |
| YGL195W | GCN1   | Positive regulator of the Gcn2p kinase activity, forms a complex with Gcn20p; proposed to stimulate Gcn2p activation by an uncharged tRNA                                                                                                    |
| YER023W | PRO3   | Delta 1-pyrroline-5-carboxylate reductase, catalyzes the last step in proline biosynthesis                                                                                                                                                   |
| YNL057W | None   |                                                                                                                                                                                                                                              |
| YLR460C | None   |                                                                                                                                                                                                                                              |
| YMR323W | None   |                                                                                                                                                                                                                                              |
| YJR116W | None   |                                                                                                                                                                                                                                              |
| YDR388W | RVS167 | BAR adaptor protein, subunit of a complex (Rvs161p-Rvs167p) that regulates actin, endocytosis, and viability following starvation or osmotic stress                                                                                          |
| YKL152C | GPM1   | converts 3-phosphoglycerate to 2-phosphoglycerate in glycolysis; Phosphoglycerate mutase                                                                                                                                                     |
| YPL231W | FAS2   | Alpha subunit of fatty acid synthetase, which catalyzes the synthesis of long-chain saturated fatty acids; contains beta-ketoacyl reductase and beta-ketoacyl synthase activities                                                            |
| YOR153W | PDR5   | Short-lived membrane ABC (ATP-binding cassette) transporter, actively exports various drugs, expression regulated by Pdr1p; also involved in steroid transport, cation resistance, and cellular                                              |

|                              |       |                                                                                                                                                                                                                                             |
|------------------------------|-------|---------------------------------------------------------------------------------------------------------------------------------------------------------------------------------------------------------------------------------------------|
|                              |       | detoxification during exponential growth                                                                                                                                                                                                    |
| YDL185W                      | TFP1  | Vacuolar ATPase V1 domain subunit A; protein precursor is spliced to yield the extein Tfp1p and the intein Vde (PI-SceI), which is a site-specific endonuclease                                                                             |
| YDR261C                      | EXG2  | Exo-1,3-beta-glucanase, involved in cell wall beta-glucan assembly; may be anchored to the plasma membrane via a glycosylphosphatidylinositol (GPI) anchor                                                                                  |
| YGL173C                      | KEM1  | 5'-3' exonuclease involved in mRNA decay, evolutionarily conserved component of cytoplasmic processing (P) bodies, plays a role in microtubule-mediated processes, filamentous growth, and ribosomal RNA maturation                         |
| YMR276W                      | DSK2  | Nuclear-enriched ubiquitin-like polyubiquitin-binding protein, required for spindle pole body (SPB) duplication and for transit through the G2/M phase of the cell cycle, involved in proteolysis, interacts with the proteasome            |
| YBR127C                      | VMA2  | Vacuolar H <sup>+</sup> ATPase regulatory subunit (subunit B) of the catalytic (V1) sector                                                                                                                                                  |
| YNL262W                      | POL2  | Catalytic subunit of DNA polymerase epsilon, one of the major chromosomal DNA replication polymerases characterized by processivity and proofreading exonuclease activity; also involved in DNA synthesis during DNA repair                 |
| YFL006W                      | None  |                                                                                                                                                                                                                                             |
| YKL127W                      | PGM1  | phosphoglucomutase, minor isoform                                                                                                                                                                                                           |
| YNL035C                      | None  |                                                                                                                                                                                                                                             |
| YGR180C                      | RNR4  | Ribonucleotide-diphosphate reductase (RNR), small subunit; the RNR complex catalyzes the rate-limiting step in dNTP synthesis and is regulated by DNA replication and DNA damage checkpoint pathways via localization of the small subunits |
| YPL048W                      | CAM1  | Calcium and phospholipid binding protein homologous to translation elongation factor 1-gamma (EF-1 gamma)                                                                                                                                   |
| YGL060W                      | YBP2  | Protein with a role in resistance to oxidative stress; has similarity to Ybp1p, which is involved in regulation of the transcription factor Yap1p via oxidation of specific cysteine residues                                               |
| YFL007W                      | BLM3  | Protein involved in assembly of proteasomal core particles in the nucleus; required for normal resistance to bleomycin, may be involved in protection against oxidative damage                                                              |
| (20) MODULE 23               |       |                                                                                                                                                                                                                                             |
| <b>Expression regulators</b> |       |                                                                                                                                                                                                                                             |
| YDR043C                      | NRG1  | Transcriptional repressor that recruits the Cyc8p-Tup1p complex to promoters; mediates glucose repression and negatively regulates a variety of processes including filamentous growth and alkaline pH response                             |
| YPR070W                      | MED1  | Subunit 1 of the Mediator complex essential for transcriptional regulation                                                                                                                                                                  |
| YDR496C                      | PUF6  | member of the PUF protein family; YDR496C                                                                                                                                                                                                   |
| YGL035C                      | MIG1  | Transcription factor involved in glucose repression; C2H2 zinc finger protein which resembles the mammalian Egr and Wilms tumour proteins                                                                                                   |
| YJR122W                      | CAF17 | Mitochondrial protein that interacts with Ccr4p in the two-                                                                                                                                                                                 |

|                     |       |                                                                                                                                                                                                          |
|---------------------|-------|----------------------------------------------------------------------------------------------------------------------------------------------------------------------------------------------------------|
|                     |       | hybrid system; 3'-untranslated region contains a putative mRNA localization element common to genes encoding mitochondrial proteins                                                                      |
| <b>Module genes</b> |       |                                                                                                                                                                                                          |
| YDL027C             | None  |                                                                                                                                                                                                          |
| YMR173W-A           | None  |                                                                                                                                                                                                          |
| YMR302C             | PRP12 | Integral inner mitochondrial membrane protein with similarity to exonucleases; prp12 mutants exhibit an increased rate of mt DNA escape                                                                  |
| YMR173W             | DDR48 | DNA damage-responsive protein, expression is increased in response to heat-shock stress or treatments that produce DNA lesions; contains multiple repeats of the amino acid sequence NNDSYGS             |
| YLR121C             | YPS3  | Aspartic protease, attached to the plasma membrane via a glycosylphosphatidylinositol (GPI) anchor                                                                                                       |
| YLR194C             | None  |                                                                                                                                                                                                          |
| YOR227W             | None  |                                                                                                                                                                                                          |
| YNL208W             | None  |                                                                                                                                                                                                          |
| YGR032W             | GSC2  | Catalytic subunit of 1,3-beta-glucan synthase, has similarity to an alternate catalytic subunit, Fks1p (Gsc1p); Rho1p encodes the regulatory subunit; involved in cell wall synthesis and maintenance    |
| YGR250C             | None  |                                                                                                                                                                                                          |
| YBR182C             | SMP1  | Transcription factor of the MADS (Mcm1p, Agamous, Deficiens, SRF) box family; closely related to RLM1; Probable DNA-binding transcription factor, Homolog to SRF/SL-2                                    |
| YMR023C             | MSS1  | May play a part in mitochondrial translation; putative mitochondrial GTPase                                                                                                                              |
| YMR280C             | CAT8  | Zinc-cluster protein involved in activating gluconeogenic genes; related to Gal4p                                                                                                                        |
| YPL054W             | LEE1  | Protein of unknown function                                                                                                                                                                              |
| YHL008C             | None  |                                                                                                                                                                                                          |
| YOR385W             | None  |                                                                                                                                                                                                          |
| YOR220W             | None  |                                                                                                                                                                                                          |
| YNL093W             | YPT53 | Involved in vacuolar protein sorting and endocytosis; GTP-binding protein of the rab family                                                                                                              |
| YMR030W             | RSF1  | Protein localized to both the nucleus and mitochondrion; mutant displays decreased transcription of specific nuclear and mitochondrial genes whose products are involved in respiratory growth           |
| YMR191W             | SPG5  | Protein required for survival at high temperature during stationary phase                                                                                                                                |
| YOR306C             | MCH5  | Protein with similarity to mammalian monocarboxylate permeases, which are involved in transport of monocarboxylic acids across the plasma membrane; mutant is not deficient in monocarboxylate transport |
| YKR061W             | KTR2  | Mannosyltransferase involved in N-linked protein glycosylation; member of the KRE2/MNT1 mannosyltransferase family                                                                                       |
| YDL032W             | None  |                                                                                                                                                                                                          |

|                              |       |                                                                                                                                                                                                                                                  |
|------------------------------|-------|--------------------------------------------------------------------------------------------------------------------------------------------------------------------------------------------------------------------------------------------------|
| YKR013W                      | PRY2  | Protein of unknown function, has similarity to Pry1p and Pry3p and to the plant PR-1 class of pathogen related proteins                                                                                                                          |
| YMR305C                      | SCW10 | Cell wall protein with similarity to glucanases; may play a role in conjugation during mating based on mutant phenotype and its regulation by Ste12p                                                                                             |
| YMR068W                      | AVO2  | Component of a complex containing the Tor2p kinase and other proteins, which may have a role in regulation of cell growth                                                                                                                        |
| YJR061W                      | None  |                                                                                                                                                                                                                                                  |
| YOL016C                      | CMK2  | Calmodulin-dependent protein kinase                                                                                                                                                                                                              |
| YER130C                      | None  |                                                                                                                                                                                                                                                  |
| YMR040W                      | YET2  | Endoplasmic reticulum transmembrane protein, homolog of human BAP31 protein                                                                                                                                                                      |
| (21) MODULE 24               |       |                                                                                                                                                                                                                                                  |
| <b>Expression regulators</b> |       |                                                                                                                                                                                                                                                  |
| YJL056C                      | ZAP1  | Zinc-regulated transcription factor, binds to zinc-responsive promoter elements to induce transcription of certain genes in the presence of zinc; regulates its own transcription; contains seven zinc-finger domains                            |
| YGL254W                      | FZF1  | Transcription factor involved in sulfite resistance; contains five zinc-fingers; activates SSU1 transcription                                                                                                                                    |
| <b>Module genes</b>          |       |                                                                                                                                                                                                                                                  |
| YOL086C                      | ADH1  | Alcohol dehydrogenase, involved in the production of certain carboxylate esters                                                                                                                                                                  |
| YMR303C                      | ADH2  | Glucose-repressible alcohol dehydrogenase II, involved in the production of certain carboxylate esters                                                                                                                                           |
| YLR130C                      | ZRT2  | Low-affinity zinc transporter of the plasma membrane; transcription is induced under low-zinc conditions by the Zap1p transcription factor                                                                                                       |
| YMR083W                      | ADH3  | Alcohol dehydrogenase isoenzyme III, shows a high affinity for alcohols with a double bond conjugated to the alcohol group                                                                                                                       |
| YDR235W                      | PRP42 | U1 snRNP protein involved in splicing, required for U1 snRNP biogenesis; contains multiple tetraatricopeptide repeats                                                                                                                            |
| YIL027C                      | KRE27 | Protein of unknown function; null mutant shows K1 killer toxin resistance                                                                                                                                                                        |
| (22) MODULE 25               |       |                                                                                                                                                                                                                                                  |
| <b>Expression regulators</b> |       |                                                                                                                                                                                                                                                  |
| YBR125C                      | PTC4  | Phosphatase type Two C; Type 2C protein phosphatase                                                                                                                                                                                              |
| YKL032C                      | IXR1  | Protein that binds DNA containing intrastrand cross-links formed by cisplatin, contains two HMG (high mobility group box) domains, which confer the ability to bend cisplatin-modified DNA; mediates aerobic transcriptional repression of COX5b |
| YLL019C                      | KNS1  | Nonessential putative protein kinase of unknown cellular role; member of the LAMMER family of protein kinases, which are serine/threonine kinases also capable of phosphorylating tyrosine residues                                              |
| <b>Module genes</b>          |       |                                                                                                                                                                                                                                                  |
| YFR012W                      | None  |                                                                                                                                                                                                                                                  |
| (23) MODULE 26               |       |                                                                                                                                                                                                                                                  |



|                              |       |                                                                                                                                                                                                                                                                 |
|------------------------------|-------|-----------------------------------------------------------------------------------------------------------------------------------------------------------------------------------------------------------------------------------------------------------------|
| <b>Expression regulators</b> |       |                                                                                                                                                                                                                                                                 |
| YGR123C                      | PPT1  | Protein serine/threonine phosphatase with similarity to human phosphatase PP5; present in both the nucleus and cytoplasm; expressed during logarithmic growth                                                                                                   |
| YKL062W                      | MSN4  | Transcriptional activator related to Msn2p; activated in stress conditions, which results in translocation from the cytoplasm to the nucleus; binds DNA at stress response elements of responsive genes, inducing gene expression                               |
| YOR337W                      | TEA1  | Mutants are defective in Ty1 Enhancer-mediated Activation; Ty1 enhancer activator                                                                                                                                                                               |
| <b>Genotype regulators</b>   |       |                                                                                                                                                                                                                                                                 |
| M1_51324_52943               |       | YAL042C-A ERV46(1,0) PTA1(4,0) YAL043C-A GCV3(3,4) YAL044W-A YAL045C YAL046C SPC72(6,3) YAL047W-A GEM1(1,1) YAL049C OAF1(6,1) YAL053W ACS1(2,7) PEX22(3,3)                                                                                                      |
| <b>Module genes</b>          |       |                                                                                                                                                                                                                                                                 |
| YAL049C                      | None  |                                                                                                                                                                                                                                                                 |
| YGL205W                      | POX1  | Fatty-acyl coenzyme A oxidase, involved in the fatty acid beta-oxidation pathway; localized to the peroxisomal matrix                                                                                                                                           |
| YOL147C                      | PEX11 | May promote peroxisomal proliferation by participating in peroxisomal elongation or fission or segregation of peroxisomes to daughter cells; Peroxisomal membrane protein                                                                                       |
| YER015W                      | FAA2  | Long chain fatty acyl-CoA synthetase; accepts a wider range of acyl chain lengths than Faa1p, preferring C9:0-C13:0; involved in the activation of endogenous pools of fatty acids                                                                              |
| YPR128C                      | ANT1  | adenine nucleotide transporter; Adenine Nucleotide Transporter                                                                                                                                                                                                  |
| (24) MODULE 27               |       |                                                                                                                                                                                                                                                                 |
| <b>Expression regulators</b> |       |                                                                                                                                                                                                                                                                 |
| YJL089W                      | SIP4  | Possibly involved in Snf1p regulated transcriptional activation; shows homology to DNA binding domain of Gal4p, has a leucine zipper motif and acidic region; lexA-Sip4p activates transcription                                                                |
| YOL100W                      | PKH2  | Pkb-activating Kinase Homologue; Ser/Thr protein kinase                                                                                                                                                                                                         |
| YDL064W                      | UBC9  | SUMO-conjugating enzyme involved in the Smt3p conjugation pathway; nuclear protein required for S- and M-phase cyclin degradation and mitotic control; involved in proteolysis mediated by the anaphase-promoting complex cyclosome (APCC)                      |
| YGR108W                      | CLB1  | Involved in mitotic induction; G(sub)2-specific B-type cyclin                                                                                                                                                                                                   |
| YDR296W                      | MHR1  | Protein involved in mitochondrial homologous DNA recombination and in transcription regulation; binds to activation domains of acidic activators; presence in RNA pol II holoenzyme may help recruit an Ssn3p-active form of the holoenzyme to target promoters |
| <b>Genotype regulators</b>   |       |                                                                                                                                                                                                                                                                 |
| M5_99004_99004               |       | RIP1(1,5) YEL025C SNU13(0,1) CUP5(0,0) YEL028W BUD16(0,2) YEL030C-A ECM10(2,0) SPF1(1,0)                                                                                                                                                                        |
| <b>Module genes</b>          |       |                                                                                                                                                                                                                                                                 |
| YJR036C                      | HUL4  | Protein with similarity to hect domain E3 ubiquitin-protein                                                                                                                                                                                                     |

|                              |        |                                                                                                                                                                                                                                                                                                                                                                                                                                                                                                         |
|------------------------------|--------|---------------------------------------------------------------------------------------------------------------------------------------------------------------------------------------------------------------------------------------------------------------------------------------------------------------------------------------------------------------------------------------------------------------------------------------------------------------------------------------------------------|
|                              |        | ligases, not essential for viability                                                                                                                                                                                                                                                                                                                                                                                                                                                                    |
| YML020W                      | None   |                                                                                                                                                                                                                                                                                                                                                                                                                                                                                                         |
| YLR377C                      | FBP1   | Fructose-1,6-bisphosphatase, required for glucose metabolism                                                                                                                                                                                                                                                                                                                                                                                                                                            |
| YPL280W                      | HSP32  | Possible chaperone and cysteine protease with similarity to E. coli Hsp31 and S. cerevisiae Hsp31p, Hsp33p, and Sno4p; member of the DJ-1/ThiJ/PfpI superfamily, which includes human DJ-1 involved in Parkinson's disease                                                                                                                                                                                                                                                                              |
| YBR250W                      | None   |                                                                                                                                                                                                                                                                                                                                                                                                                                                                                                         |
| YNL295W                      | None   |                                                                                                                                                                                                                                                                                                                                                                                                                                                                                                         |
| (25) MODULE 28               |        |                                                                                                                                                                                                                                                                                                                                                                                                                                                                                                         |
| <b>Expression regulators</b> |        |                                                                                                                                                                                                                                                                                                                                                                                                                                                                                                         |
| YDR496C                      | PUF6   | member of the PUF protein family; YDR496C                                                                                                                                                                                                                                                                                                                                                                                                                                                               |
| <b>Genotype regulators</b>   |        |                                                                                                                                                                                                                                                                                                                                                                                                                                                                                                         |
| M12_450041_508029            |        | YLR149C-A STM1(0,0) PCD1(0,2) YLR152C ACS2(2,0) RNH203(0,3) YLR154C-G YLR154C-H TAR1(0,0) YLR154W-B YLR154W-C YLR154W-E YLR154W-F ASP3-1(193,529) YLR156C-A YLR156W ASP3-2(193,524) YLR157C-C YLR157W-A YLR157W-C ASP3-3(193,529) YLR159C-A YLR159W ASP3-4(193,529) YLR161W YLR162W YLR162W-A YLR162W- MAS1(3,5) YLR163W-A YLR164W PUS5(3,1) SEC10(7,11) RPS31(0,11) YLR168C YLR169W APS1(1,2) YLR171W DPH5(0,5) YLR173W IDP2(0,3) CBF5(1,2) RFX1(13,11) YLR177W TFS1(1,3) YLR179C SAM1(0,10) VTA1(4,4) |
| <b>Module genes</b>          |        |                                                                                                                                                                                                                                                                                                                                                                                                                                                                                                         |
| YLR156W                      | None   |                                                                                                                                                                                                                                                                                                                                                                                                                                                                                                         |
| YLR158C                      | ASP3-3 | Cell-wall L-asparaginase II, involved in asparagine catabolism; expression is induced during nitrogen starvation; four copies of ASP3 are present in the genome reference strain S288C                                                                                                                                                                                                                                                                                                                  |
| YLR161W                      | None   |                                                                                                                                                                                                                                                                                                                                                                                                                                                                                                         |
| YLR155C                      | ASP3-1 | Cell-wall L-asparaginase II, involved in asparagine catabolism; expression is induced during nitrogen starvation; four copies of ASP3 are present in the genome reference strain S288C                                                                                                                                                                                                                                                                                                                  |
| YCL073C                      | None   |                                                                                                                                                                                                                                                                                                                                                                                                                                                                                                         |
| YLR160C                      | ASP3-4 | Cell-wall L-asparaginase II, involved in asparagine catabolism; expression is induced during nitrogen starvation; four copies of ASP3 are present in the genome reference strain S288C                                                                                                                                                                                                                                                                                                                  |
| YLR159W                      | None   |                                                                                                                                                                                                                                                                                                                                                                                                                                                                                                         |
| YLR157C                      | ASP3-2 | Cell-wall L-asparaginase II, involved in asparagine catabolism; expression is induced during nitrogen starvation; four copies of ASP3 are present in the genome reference strain S288C                                                                                                                                                                                                                                                                                                                  |
| (26) MODULE 29               |        |                                                                                                                                                                                                                                                                                                                                                                                                                                                                                                         |
| <b>Expression regulators</b> |        |                                                                                                                                                                                                                                                                                                                                                                                                                                                                                                         |
| YJR094C                      | IME1   | Master regulator of meiosis that is active only during meiotic events, activates transcription of early meiotic genes through interaction with Ume6p, degraded by the 26S proteasome following phosphorylation by Ime2p                                                                                                                                                                                                                                                                                 |
| YDR277C                      | MTH1   | Negative regulator of the glucose-sensing signal transduction                                                                                                                                                                                                                                                                                                                                                                                                                                           |

|                              |       |                                                                                                                                                                                                                                                                     |
|------------------------------|-------|---------------------------------------------------------------------------------------------------------------------------------------------------------------------------------------------------------------------------------------------------------------------|
|                              |       | pathway, required for repression of transcription by Rgt1p; interacts with Rgt1p and the Snf3p and Rgt2p glucose sensors; phosphorylated by Yck1p, triggering Mth1p degradation                                                                                     |
| YPL016W                      | SWI1  | Global transcription activator that acts in complex with Snf2p, Snf5p, Snf6p, and Swi3p to assist gene-specific activators; involved in the regulation of expression of many genes, including ADH1, ADH2, GAL1, HO, INO1 and SUC2; Zinc-finger transcription factor |
| <b>Module genes</b>          |       |                                                                                                                                                                                                                                                                     |
| YCR101C                      | None  |                                                                                                                                                                                                                                                                     |
| YGR156W                      | PTI1  | Pta1p Interacting protein                                                                                                                                                                                                                                           |
| YOR392W                      | None  |                                                                                                                                                                                                                                                                     |
| YGL091C                      | NBP35 | NBP35 encodes an essential evolutionary conserved protein with homology to bacterial partitioning ATPases; 35 kDa nucleotide binding protein                                                                                                                        |
| YPR116W                      | None  |                                                                                                                                                                                                                                                                     |
| YGR226C                      | None  |                                                                                                                                                                                                                                                                     |
| YJL038C                      | None  |                                                                                                                                                                                                                                                                     |
| YMR042W                      | ARG80 | Regulator of arginine-responsive genes with ARG81 and ARG82; transcription factor                                                                                                                                                                                   |
| YPR014C                      | None  |                                                                                                                                                                                                                                                                     |
| YIL060W                      | None  |                                                                                                                                                                                                                                                                     |
| YHL037C                      | None  |                                                                                                                                                                                                                                                                     |
| YOR173W                      | DCS2  | Non-essential protein containing a HIT (histidine triad) motif; regulated by Msn2p, Msn4p, and the Ras-cAMP-cAPK signalling pathway, transcript accumulates under glucose limitation, similar to Dcs1p                                                              |
| YNL054W                      | VAC7  | Integral vacuolar membrane protein; may function to regulate Fab1p kinase activity                                                                                                                                                                                  |
| YPR067W                      | ISA2  | Protein required for maturation of mitochondrial and cytosolic Fe/S proteins, localizes to the mitochondrial intermembrane space, overexpression of ISA2 suppresses grx5 mutations                                                                                  |
| YMR326C                      | None  |                                                                                                                                                                                                                                                                     |
| (27) MODULE 30               |       |                                                                                                                                                                                                                                                                     |
| <b>Expression regulators</b> |       |                                                                                                                                                                                                                                                                     |
| YOL100W                      | PKH2  | Pkb-activating Kinase Homologue; Ser/Thr protein kinase                                                                                                                                                                                                             |
| YJL005W                      | CYR1  | Required for START A of cell cycle, and glucose and nitrogen repression of sporulation; adenylate cyclase                                                                                                                                                           |
| YDR195W                      | REF2  | RNA-binding protein involved in the cleavage step of mRNA 3'-end formation prior to polyadenylation; also involved in snoRNA maturation                                                                                                                             |
| YGL071W                      | RCS1  | Transcription factor that binds the consensus site PyPuCACCCPu, involved in iron homeostasis and cell size regulation; activates the expression of target genes in response to low-iron conditions                                                                  |
| YPL016W                      | SWI1  | Global transcription activator that acts in complex with Snf2p, Snf5p, Snf6p, and Swi3p to assist gene-specific activators; involved in the regulation of expression of many genes, including ADH1, ADH2, GAL1, HO, INO1 and SUC2; Zinc-                            |

|                            |        |                                                                                                                                                                                                                                             |
|----------------------------|--------|---------------------------------------------------------------------------------------------------------------------------------------------------------------------------------------------------------------------------------------------|
|                            |        | finger transcription factor                                                                                                                                                                                                                 |
| YNL031C                    | HHT2   | One of two identical histone H3 proteins (see also HHT1); core histone required for chromatin assembly, involved in heterochromatin-mediated telomeric and HM silencing; regulated by acetylation, methylation, and mitotic phosphorylation |
| <b>Genotype regulators</b> |        |                                                                                                                                                                                                                                             |
| M12_1056097_1056103        |        | FMP27(8,6) YLR455W YLR456W NBP1(2,5) YLR458W GAB1(1,5) YLR460C PAU4(1,435)                                                                                                                                                                  |
| <b>Module genes</b>        |        |                                                                                                                                                                                                                                             |
| YPR203W                    | None   |                                                                                                                                                                                                                                             |
| YFL068W                    | None   |                                                                                                                                                                                                                                             |
| YER190W                    | YRF1-2 | Helicase encoded by the Y' element of subtelomeric regions, highly expressed in the mutants lacking the telomerase component TLC1; potentially phosphorylated by Cdc28p                                                                     |
| YJL225C                    | None   |                                                                                                                                                                                                                                             |
| YLR434C                    | None   |                                                                                                                                                                                                                                             |
| YPL283C                    | YRF1-7 | Helicase encoded by the Y' element of subtelomeric regions, highly expressed in the mutants lacking the telomerase component TLC1; potentially phosphorylated by Cdc28p                                                                     |
| YLL067C                    | None   |                                                                                                                                                                                                                                             |
| YEL076W-C                  | None   |                                                                                                                                                                                                                                             |
| YEL077C                    | None   |                                                                                                                                                                                                                                             |
| YIL177C                    | None   |                                                                                                                                                                                                                                             |
| YFL066C                    | None   |                                                                                                                                                                                                                                             |
| YLR463C                    | None   |                                                                                                                                                                                                                                             |
| YBL109W                    | None   |                                                                                                                                                                                                                                             |
| YDR544C                    | None   |                                                                                                                                                                                                                                             |
| YLR466W                    | YRF1-4 | Helicase encoded by the Y' element of subtelomeric regions, highly expressed in the mutants lacking the telomerase component TLC1; potentially phosphorylated by Cdc28p                                                                     |
| YJR115W                    | None   |                                                                                                                                                                                                                                             |
| YLR462W                    | None   |                                                                                                                                                                                                                                             |
| YEL076C-A                  | None   |                                                                                                                                                                                                                                             |
| YHR218W                    | None   |                                                                                                                                                                                                                                             |
| YML133C                    | None   |                                                                                                                                                                                                                                             |
| YBL111C                    | None   |                                                                                                                                                                                                                                             |
| YHL049C                    | None   |                                                                                                                                                                                                                                             |
| YNL339C                    | YRF1-6 | Helicase encoded by the Y' element of subtelomeric regions, highly expressed in the mutants lacking the telomerase component TLC1; potentially phosphorylated by Cdc28p                                                                     |
| YLR467W                    | YRF1-5 | Helicase encoded by the Y' element of subtelomeric regions, highly expressed in the mutants lacking the telomerase component TLC1; potentially phosphorylated by Cdc28p                                                                     |
| YEL075C                    | None   |                                                                                                                                                                                                                                             |
| YNL338W                    | None   |                                                                                                                                                                                                                                             |
| YHR219W                    | None   |                                                                                                                                                                                                                                             |

|                              |        |                                                                                                                                                                                                                                             |
|------------------------------|--------|---------------------------------------------------------------------------------------------------------------------------------------------------------------------------------------------------------------------------------------------|
| YER189W                      | None   |                                                                                                                                                                                                                                             |
| YFL064C                      | None   |                                                                                                                                                                                                                                             |
| YBL112C                      | None   |                                                                                                                                                                                                                                             |
| YLR465C                      | BSC3   | Dubious open reading frame, unlikely to encode a protein; not conserved in closely related <i>Saccharomyces</i> species; 100% of YLR465C overlaps the uncharacterized ORF YLR464W and 86% of YLR465C overlaps the verified gene YRF1-4      |
| YPR202W                      | None   |                                                                                                                                                                                                                                             |
| YEL074W                      | None   |                                                                                                                                                                                                                                             |
| YFL067W                      | None   |                                                                                                                                                                                                                                             |
| YLR464W                      | None   |                                                                                                                                                                                                                                             |
| YLL066C                      | None   |                                                                                                                                                                                                                                             |
| YHL050C                      | None   |                                                                                                                                                                                                                                             |
| YDR545W                      | YRF1-1 | Helicase encoded by the Y' element of subtelomeric regions, highly expressed in the mutants lacking the telomerase component TLC1; potentially phosphorylated by Cdc28p                                                                     |
| YEL076C                      | None   |                                                                                                                                                                                                                                             |
| YFL065C                      | None   |                                                                                                                                                                                                                                             |
| YBL113C                      | None   |                                                                                                                                                                                                                                             |
| YGR296W                      | YRF1-3 | Helicase encoded by the Y' element of subtelomeric regions, highly expressed in the mutants lacking the telomerase component TLC1; potentially phosphorylated by Cdc28p                                                                     |
| (28) MODULE 31               |        |                                                                                                                                                                                                                                             |
| <b>Expression regulators</b> |        |                                                                                                                                                                                                                                             |
| YGL229C                      | SAP4   | Protein required for function of the Sit4p protein phosphatase, member of a family of similar proteins that form complexes with Sit4p, including Sap155p, Sap185p, and Sap190p                                                              |
| YIL033C                      | BCY1   | Regulatory subunit of the cyclic AMP-dependent protein kinase (PKA), a component of a signaling pathway that controls a variety of cellular processes, including metabolism, cell cycle, stress response, stationary phase, and sporulation |
| YDR523C                      | SPS1   | dispensable for mitosis, involved in middle/late stage of meiosis, required for spore wall formation; serine/threonine kinase homologous to Ste20p; expressed in middle/late meiosis                                                        |
| YGR156W                      | PTI1   | Pta1p Interacting protein                                                                                                                                                                                                                   |
| YMR179W                      | SPT21  | Protein required for normal transcription at several loci including HTA2-HTB2 and HHF2-HHT2, but not required at the other histone loci; functionally related to Spt10p                                                                     |
| YNL030W                      | HHF2   | One of two identical histone H4 proteins (see also HHF1); core histone required for chromatin assembly and chromosome function; contributes to telomeric silencing; N-terminal domain involved in maintaining genomic integrity             |
| YKL109W                      | HAP4   | Subunit of the heme-activated, glucose-repressed Hap2p/3p/4p/5p CCAAT-binding complex, a transcriptional activator and global regulator of respiratory gene expression; provides the principal activation function of the complex           |
| <b>Module genes</b>          |        |                                                                                                                                                                                                                                             |
| YMR325W                      | None   |                                                                                                                                                                                                                                             |

|                              |      |                                                                                                                                                                                                                                            |
|------------------------------|------|--------------------------------------------------------------------------------------------------------------------------------------------------------------------------------------------------------------------------------------------|
| YIL175W                      | None |                                                                                                                                                                                                                                            |
| YIR041W                      | None |                                                                                                                                                                                                                                            |
| YLR461W                      | PAU4 | Part of 23-member seripauperin multigene family encoded mainly in subtelomeric regions, active during alcoholic fermentation, regulated by anaerobiosis, negatively regulated by oxygen, repressed by heme                                 |
| YDR542W                      | None |                                                                                                                                                                                                                                            |
| YLL064C                      | None |                                                                                                                                                                                                                                            |
| YIR040C                      | None |                                                                                                                                                                                                                                            |
| YGR294W                      | None |                                                                                                                                                                                                                                            |
| YJL223C                      | PAU1 | Part of 23-member seripauperin multigene family encoded mainly in subtelomeric regions, active during alcoholic fermentation, regulated by anaerobiosis, negatively regulated by oxygen, repressed by heme                                 |
| YCR103C                      | None |                                                                                                                                                                                                                                            |
| YOR394W                      | None |                                                                                                                                                                                                                                            |
| YGL261C                      | None |                                                                                                                                                                                                                                            |
| YKL223W                      | None |                                                                                                                                                                                                                                            |
| YAL068C                      | None |                                                                                                                                                                                                                                            |
| YHL046C                      | None |                                                                                                                                                                                                                                            |
| YGL260W                      | None |                                                                                                                                                                                                                                            |
| YIL174W                      | None |                                                                                                                                                                                                                                            |
| YPL282C                      | None |                                                                                                                                                                                                                                            |
| YIL176C                      | None |                                                                                                                                                                                                                                            |
| YOL161C                      | None |                                                                                                                                                                                                                                            |
| (29) MODULE 33               |      |                                                                                                                                                                                                                                            |
| <b>Expression regulators</b> |      |                                                                                                                                                                                                                                            |
| YJL089W                      | SIP4 | Possibly involved in Snf1p regulated transcriptional activation; shows homology to DNA binding domain of Gal4p, has a leucine zipper motif and acidic region; lexA-Sip4p activates transcription                                           |
| YCL026C-A                    | FRM2 | Protein of unknown function, involved in the integration of lipid signaling pathways with cellular homeostasis                                                                                                                             |
| YDL064W                      | UBC9 | SUMO-conjugating enzyme involved in the Smt3p conjugation pathway; nuclear protein required for S- and M-phase cyclin degradation and mitotic control; involved in proteolysis mediated by the anaphase-promoting complex cyclosome (APCC) |
| YPL026C                      | SKS1 | multicopy suppressor of snf3 and grr1 mutants; serine/threonine protein kinase homologous to Ran1p                                                                                                                                         |
| YLR183C                      | TOS4 | Transcription factor that binds to a number of promoter regions, particularly promoters of some genes involved in pheromone response and cell cycle; potential Cdc28p substrate; expression is induced in G1 by bound SBF                  |
| YDL101C                      | DUN1 | Cell-cycle checkpoint serine-threonine kinase required for DNA damage-induced transcription of certain target genes, phosphorylation of Rad55p and Sml1p, and transient G2/M arrest after DNA damage; also regulates postreplicative DNA   |

|                     |        |                                                                                                                                                                                                                                    |
|---------------------|--------|------------------------------------------------------------------------------------------------------------------------------------------------------------------------------------------------------------------------------------|
|                     |        | repair                                                                                                                                                                                                                             |
| YJL098W             | SAP185 | Protein that forms a complex with the Sit4p protein phosphatase and is required for its function; member of a family of similar proteins including Sap4p, Sap155p, and Sap190p                                                     |
| <b>Module genes</b> |        |                                                                                                                                                                                                                                    |
| YDL218W             | None   |                                                                                                                                                                                                                                    |
| YOL156W             | HXT11  | Putative hexose transporter that is nearly identical to Hxt9p, has similarity to major facilitator superfamily (MFS) transporters and is involved in pleiotropic drug resistance                                                   |
| YMR034C             | None   |                                                                                                                                                                                                                                    |
| YGR213C             | RTA1   | involved in 7-amincholesterol resistance                                                                                                                                                                                           |
| YCR021C             | HSP30  | Hydrophobic plasma membrane localized, stress-responsive protein that negatively regulates the H(+)-ATPase Pma1p; induced by heat shock, ethanol treatment, weak organic acid, glucose limitation, and entry into stationary phase |
| YGR286C             | BIO2   | Biotin synthase, catalyzes the conversion of dethiobiotin to biotin, which is the last step of the biotin biosynthesis pathway; complements E. coli bioB mutant                                                                    |
| YLR445W             | None   |                                                                                                                                                                                                                                    |
| YLL063C             | AYT1   | Acetyltransferase; catalyzes trichothecene 3-O-acetylation, suggesting a possible role in trichothecene biosynthesis                                                                                                               |
| YNL336W             | COS1   | Protein of unknown function, member of a family of conserved, often subtelomerically-encoded proteins                                                                                                                              |
| YPL163C             | SVS1   | Cell wall and vacuolar protein, required for wild-type resistance to vanadate                                                                                                                                                      |
| YIR043C             | None   |                                                                                                                                                                                                                                    |
| YAR060C             | None   |                                                                                                                                                                                                                                    |
| YIL085C             | KTR7   | Putative mannosyltransferase involved in protein glycosylation; member of the KRE2/MNT1 mannosyltransferase family                                                                                                                 |
| YBR045C             | GIP1   | Meiosis-specific protein proposed to be a regulatory subunit of the protein phosphatase Glc7p, required for spore wall formation and proper septin organization                                                                    |
| YNL289W             | PCL1   | Pho85 cyclin of the Pcl1,2-like subfamily, involved in entry into the mitotic cell cycle and regulation of morphogenesis, localizes to sites of polarized cell growth                                                              |
| YDR276C             | PMP3   | plasma membrane protein involved in salt tolerance; hypothetical transmembrane protein                                                                                                                                             |
| YDR540C             | None   |                                                                                                                                                                                                                                    |
| YML131W             | None   |                                                                                                                                                                                                                                    |
| YNL334C             | SNO2   | Protein of unknown function, nearly identical to Sno3p; expression is induced before the diauxic shift and also in the absence of thiamin                                                                                          |
| YGR295C             | COS6   | Protein of unknown function, member of a family of conserved, often subtelomerically-encoded proteins                                                                                                                              |
| YMR206W             | None   |                                                                                                                                                                                                                                    |
| YPL272C             | None   |                                                                                                                                                                                                                                    |
| YJR161C             | COS5   | Protein of unknown function, member of a family of conserved, often subtelomerically-encoded proteins                                                                                                                              |
| YDL248W             | COS7   | Protein of unknown function, member of a family of conserved,                                                                                                                                                                      |

|         |       |                                                                                                                                                                                                            |
|---------|-------|------------------------------------------------------------------------------------------------------------------------------------------------------------------------------------------------------------|
|         |       | often subtelomerically-encoded proteins                                                                                                                                                                    |
| YLR235C | None  |                                                                                                                                                                                                            |
| YGR259C | None  |                                                                                                                                                                                                            |
| YIR044C | None  |                                                                                                                                                                                                            |
| YDR419W | RAD30 | DNA polymerase eta, involved in the predominantly error-free bypass replication of DNA lesions; homolog of human XPV and bacterial DinB proteins                                                           |
| YBR302C | COS2  | Protein of unknown function, member of a family of conserved, often subtelomerically-encoded proteins                                                                                                      |
| YLL047W | None  |                                                                                                                                                                                                            |
| YIL120W | QDR1  | Quinidine Resistance; MFS-MDR transporter                                                                                                                                                                  |
| YKL003C | MRP17 | Mitochondrial ribosomal protein of the small subunit; MRP17 exhibits genetic interactions with PET122, encoding a COX3-specific translational activator                                                    |
| YEL049W | PAU2  | Part of 23-member seripauperin multigene family encoded mainly in subtelomeric regions, active during alcoholic fermentation, regulated by anaerobiosis, negatively regulated by oxygen, repressed by heme |
| YOL146W | PSF3  | Subunit of the GINS complex (Sld5p, Psf1p, Psf2p, Psf3p), which binds to DNA replication origins and facilitates assembly of the DNA replication machinery                                                 |
| YML132W | COS3  | Protein involved in salt resistance; interacts with sodium:hydrogen antiporter Nha1p; member of a family of conserved, often subtelomerically-encoded proteins                                             |
| YFL062W | COS4  | Protein of unknown function, member of a family of conserved, often subtelomerically-encoded proteins                                                                                                      |
| YPL089C | RLM1  | serum response factor-like protein that may function downstream of MPK1 (SLT2) MAP-kinase pathway; serum response factor-like protein                                                                      |
| YPL281C | ERR2  | Protein of unknown function, has similarity to enolases                                                                                                                                                    |
| YHL048W | COS8  | Nuclear membrane protein, member of a family of conserved, often subtelomerically-encoded proteins; regulation suggests a potential role in the unfolded protein response                                  |
| YPR054W | SMK1  | Mitogen-activated protein kinase required for spore morphogenesis that is expressed as a middle sporulation-specific gene                                                                                  |
| YNR074C | None  |                                                                                                                                                                                                            |
| YPL096W | PNG1  | de-N-glycosylation enzyme; peptide:N-glycanase                                                                                                                                                             |
| YEL070W | DSF1  | None                                                                                                                                                                                                       |
| YDR400W | URH1  | uridine nucleosidase (uridine ribohydrolase); EC 3.2.2.3                                                                                                                                                   |
| YIL131C | FKH1  | Transcription factor of the forkhead family that regulates the cell cycle and pseudohyphal growth; also involved in chromatin silencing at HML and HMR                                                     |
| YIL162W | SUC2  | None                                                                                                                                                                                                       |
| YGR189C | CRH1  | Putative glycosidase of the cell wall, may have a role in cell wall architecture                                                                                                                           |
| YOR302W | None  |                                                                                                                                                                                                            |
| YOR222W | ODC2  | Mitochondrial inner membrane transporter, exports 2-oxoadipate and 2-oxoglutarate from the mitochondrial matrix to the cytosol                                                                             |



|                              |       |                                                                                                                                                                                                                                             |
|------------------------------|-------|---------------------------------------------------------------------------------------------------------------------------------------------------------------------------------------------------------------------------------------------|
|                              |       | for use in lysine and glutamate biosynthesis and in lysine catabolism                                                                                                                                                                       |
| YNL014W                      | HEF3  | Translational elongation factor EF-3; paralog of YEF3 and member of the ABC superfamily; stimulates EF-1 alpha-dependent binding of aminoacyl-tRNA by the ribosome; normally expressed in zinc deficient cells                              |
| YOL065C                      | INP54 | Phosphatidylinositol 4,5-bisphosphate 5-phosphatase with a role in secretion, localizes to the endoplasmic reticulum via the C-terminal tail; lacks the Sac1 domain and proline-rich region found in the other 3 INP proteins               |
| (30) MODULE 35               |       |                                                                                                                                                                                                                                             |
| <b>Expression regulators</b> |       |                                                                                                                                                                                                                                             |
| YIL033C                      | BCY1  | Regulatory subunit of the cyclic AMP-dependent protein kinase (PKA), a component of a signaling pathway that controls a variety of cellular processes, including metabolism, cell cycle, stress response, stationary phase, and sporulation |
| YMR228W                      | MTF1  | Mitochondrial RNA polymerase sigma-like specificity factor required for promoter recognition, interacts with mitochondrial core polymerase Rpo41p, imported into mitochondria via a novel process requiring most of the Mtf1p sequence      |
| YDL170W                      | UGA3  | Transcriptional activator necessary for gamma-aminobutyrate (GABA)-dependent induction of GABA genes (such as UGA1, UGA2, UGA4); zinc-finger transcription factor of the Zn(2)-Cys(6) binuclear cluster domain type                         |
| YHR136C                      | SPL2  | Protein with similarity to cyclin-dependent kinase inhibitors, overproduction suppresses a plc1 null mutation; green fluorescent protein (GFP)-fusion protein localizes to the cytoplasm in a punctate pattern                              |
| <b>Module genes</b>          |       |                                                                                                                                                                                                                                             |
| YLR308W                      | CDA2  | Required for proper formation of the ascospore wall; Chitin Deacetylase                                                                                                                                                                     |
| YBR051W                      | None  |                                                                                                                                                                                                                                             |
| YKL205W                      | LOS1  | Nuclear pore protein involved in nuclear export of pre-tRNA                                                                                                                                                                                 |
| YPR179C                      | HDA3  | Subunit of a possibly tetrameric trichostatin A-sensitive class II histone deacetylase complex that contains an Hda1p homodimer and an Hda2p-Hda3p heterodimer; required for the activity of the complex; has similarity to Hda2p           |
| YMR018W                      | None  |                                                                                                                                                                                                                                             |
| YBR018C                      | GAL7  | Galactose-1-phosphate uridyl transferase, synthesizes glucose-1-phosphate and UDP-galactose from UDP-D-glucose and alpha-D-galactose-1-phosphate in the second step of galactose catabolism                                                 |
| YMR265C                      | None  |                                                                                                                                                                                                                                             |
| YPL209C                      | IPL1  | Aurora kinase involved in regulating kinetochore-microtubule attachments, associates with Sli5p, which stimulates Ipl1p kinase activity and promotes its association with the mitotic spindle, potential Cdc28p substrate                   |
| YIR001C                      | SGN1  | Cytoplasmic RNA-binding protein, contains an RNA recognition motif (RRM); may have a role in mRNA translation, as suggested by genetic interactions with genes encoding                                                                     |

|                              |       |                                                                                                                                                                                                                                               |
|------------------------------|-------|-----------------------------------------------------------------------------------------------------------------------------------------------------------------------------------------------------------------------------------------------|
|                              |       | proteins involved in translational initiation                                                                                                                                                                                                 |
| (31) MODULE 36               |       |                                                                                                                                                                                                                                               |
| <b>Expression regulators</b> |       |                                                                                                                                                                                                                                               |
| YIR017C                      | MET28 | Transcriptional activator in the Cbf1p-Met4p-Met28p complex, participates in the regulation of sulfur metabolism                                                                                                                              |
| YDR225W                      | HTA1  | One of two nearly identical (see also HTA2) histone H2A subtypes; core histone required for chromatin assembly and chromosome function; DNA damage-dependent phosphorylation by Mec1p facilitates DNA repair; acetylated by Nat4p             |
| YMR019W                      | STB4  | Protein that binds Sin3p in a two-hybrid assay                                                                                                                                                                                                |
| YJL187C                      | SWE1  | Protein kinase that regulates the G2/M transition by inhibition of Cdc28p kinase activity; localizes to the nucleus and to the daughter side of the mother-bud neck; homolog of <i>S. pombe</i> Wee1p; potential Cdc28p substrate             |
| YHR005C                      | GPA1  | Alpha subunit of G protein coupled to mating factor receptors, involved in the mating pheromone signal transduction pathway; component of pheromone response pathway common to both a and alpha cells                                         |
| <b>Genotype regulators</b>   |       |                                                                                                                                                                                                                                               |
| M4_1022764_1039379           |       | PMP3(0,3) MTH1(0,5) YDR278C RNH202(0,2) RRP45(0,0) PHM6(0,2) YDR282C GCN2(2,0) DPP1(0,0) ZIP1(0,0) YDR286C YDR287W NSE3(1,0) RTT103(2,0) YDR290W YDR291W SRP101(1,1) SSD1(0,0)                                                                |
| <b>Module genes</b>          |       |                                                                                                                                                                                                                                               |
| YOR202W                      | HIS3  | Imidazoleglycerol-phosphate dehydratase, catalyzes the sixth step in histidine biosynthesis; mutations cause histidine auxotrophy and sensitivity to Cu, Co, and Ni salts; transcription is regulated by general amino acid control via Gcn4p |
| YIL164C                      | NIT1  | Nitrilase, member of the widely found nitrilase branch (EC:3.5.5.1) of the nitrilase superfamily                                                                                                                                              |
| YDL170W                      | UGA3  | Transcriptional activator necessary for gamma-aminobutyrate (GABA)-dependent induction of GABA genes (such as UGA1, UGA2, UGA4); zinc-finger transcription factor of the Zn(2)-Cys(6) binuclear cluster domain type                           |
| YDL066W                      | IDP1  | Mitochondrial NADP-specific isocitrate dehydrogenase, catalyzes the oxidation of isocitrate to alpha-ketoglutarate; not required for mitochondrial respiration and may function to divert alpha-ketoglutarate to biosynthetic processes       |
| YBR147W                      | None  |                                                                                                                                                                                                                                               |
| YLR092W                      | SUL2  | High affinity sulfate permease; sulfate uptake is mediated by specific sulfate transporters Sul1p and Sul2p, which control the concentration of endogenous activated sulfate intermediates                                                    |
| YMR062C                      | ECM40 | Mitochondrial ornithine acetyltransferase, catalyzes the fifth step in arginine biosynthesis; also possesses acetylglutamate synthase activity, regenerates acetylglutamate while forming ornithine                                           |
| YCL030C                      | HIS4  | Multifunctional enzyme containing phosphoribosyl-ATP pyrophosphatase, phosphoribosyl-AMP cyclohydrolase, and histidinol dehydrogenase activities; catalyzes the second, third, ninth and tenth steps in histidine biosynthesis                |

|         |       |                                                                                                                                                                                                                                     |
|---------|-------|-------------------------------------------------------------------------------------------------------------------------------------------------------------------------------------------------------------------------------------|
| YJR111C | None  |                                                                                                                                                                                                                                     |
| YNL104C | LEU4  | Alpha-isopropylmalate synthase (2-isopropylmalate synthase); the main isozyme responsible for the first step in the leucine biosynthesis pathway                                                                                    |
| YFR030W | MET10 | Subunit alpha of assimilatory sulfite reductase, which is responsible for the conversion of sulfite into sulfide                                                                                                                    |
| YBR047W | FMP23 | The authentic, non-tagged protein was localized to the mitochondria                                                                                                                                                                 |
| YKL218C | SRY1  | 3-hydroxyaspartate dehydratase, deaminates L-threo-3-hydroxyaspartate to form oxaloacetate and ammonia; required for survival in the presence of hydroxyaspartate                                                                   |
| YJL088W | ARG3  | Ornithine carbamoyltransferase (carbamoylphosphate:L-ornithine carbamoyltransferase), catalyzes the sixth step in the biosynthesis of the arginine precursor ornithine                                                              |
| YDR034C | LYS14 | Transcriptional activator involved in regulation of genes of the lysine biosynthesis pathway; requires 2-aminoadipate semialdehyde as co-inducer                                                                                    |
| YOL140W | ARG8  | Acetylornithine aminotransferase, catalyzes the fourth step in the biosynthesis of the arginine precursor ornithine                                                                                                                 |
| YMR095C | SNO1  | Protein of unconfirmed function, involved in pyridoxine metabolism; expression is induced during stationary phase; forms a putative glutamine amidotransferase complex with Snz1p, with Sno1p serving as the glutaminase            |
| YGL125W | MET13 | Isozyme of methylenetetrahydrofolate reductase, catalyzes the reduction of 5,10-methylenetetrahydrofolate to 5-methyltetrahydrofolate in the methionine biosynthesis pathway                                                        |
| YGL117W | None  |                                                                                                                                                                                                                                     |
| YOR303W | CPA1  | Small subunit of carbamoyl phosphate synthetase, which catalyzes a step in the synthesis of citrulline, an arginine precursor; translationally regulated by an attenuator peptide encoded by YOR302W within the CPA1 mRNA 5'-leader |
| YFR055W | None  |                                                                                                                                                                                                                                     |
| YHR018C | ARG4  | Argininosuccinate lyase, catalyzes the final step in the arginine biosynthesis pathway                                                                                                                                              |
| YDR354W | TRP4  | anthranilate phosphoribosyl transferase                                                                                                                                                                                             |
| YOR203W | None  |                                                                                                                                                                                                                                     |
| YJR155W | AAD10 | Putative aryl-alcohol dehydrogenase with similarity to P. chrysosporium aryl-alcohol dehydrogenase; mutational analysis has not yet revealed a physiological role                                                                   |
| YOL118C | None  |                                                                                                                                                                                                                                     |
| YMR094W | CTF13 | Subunit of the CBF3 complex, which binds to the CDE III element of centromeres, bending the DNA upon binding, and may be involved in sister chromatid cohesion during mitosis                                                       |
| YDR158W | HOM2  | Aspartic beta semi-aldehyde dehydrogenase, catalyzes the second step in the common pathway for methionine and threonine biosynthesis; expression regulated by Gcn4p and the general control of amino acid synthesis                 |
| YOR184W | SER1  | phosphoserine transaminase                                                                                                                                                                                                          |
| YHR017W | YSC83 | similar to S. douglasii YSD83                                                                                                                                                                                                       |
| YJL089W | SIP4  | Possibly involved in Snf1p regulated transcriptional activation;                                                                                                                                                                    |

|         |        |                                                                                                                                                                                                                                                 |
|---------|--------|-------------------------------------------------------------------------------------------------------------------------------------------------------------------------------------------------------------------------------------------------|
|         |        | shows homology to DNA binding domain of Gal4p, has a leucine zipper motif and acidic region; lexA-Sip4p activates transcription                                                                                                                 |
| YER052C | HOM3   | Aspartate kinase (L-aspartate 4-P-transferase); cytoplasmic enzyme that catalyzes the first step in the common pathway for methionine and threonine biosynthesis; expression regulated by Gcn4p and the general control of amino acid synthesis |
| YOR221C | MCT1   | Predicted malonyl-CoA:ACP transferase, putative component of a type-II mitochondrial fatty acid synthase that produces intermediates for phospholipid remodeling                                                                                |
| YIL003W | CFD1   | Highly conserved, putative P-loop ATPase localized in the cytoplasm; has a potential role in assembly of iron-sulfur clusters in proteins                                                                                                       |
| YDL131W | LYS21  | Homocitrate synthase isozyme, catalyzes the condensation of acetyl-CoA and alpha-ketoglutarate to form homocitrate, which is the first step in the lysine biosynthesis pathway; highly similar to the other isozyme, Lys20p                     |
| YNL036W | NCE103 | Protein with a carbonic anhydrase activity, involved in non-classical protein export pathway                                                                                                                                                    |
| YNL277W | MET2   | L-homoserine-O-acetyltransferase, catalyzes the conversion of homoserine to O-acetyl homoserine which is the first step of the methionine biosynthetic pathway                                                                                  |
| YGL184C | STR3   | Cystathionine beta-lyase, converts cystathionine into homocysteine                                                                                                                                                                              |
| YJR137C | ECM17  | Sulfite reductase beta subunit, involved in amino acid biosynthesis, transcription repressed by methionine                                                                                                                                      |
| YFR025C | HIS2   | Histidinolphosphatase, catalyzes the eighth step in histidine biosynthesis; mutations cause histidine auxotrophy and sensitivity to Cu, Co, and Ni salts; transcription is regulated by general amino acid control                              |
| YIL056W | None   |                                                                                                                                                                                                                                                 |
| YBR218C | PYC2   | converts pyruvate to oxaloacetate; pyruvate carboxylase                                                                                                                                                                                         |
| YPR145W | ASN1   | Asparagine synthetase, isozyme of Asn2p; catalyzes the synthesis of L-asparagine from L-aspartate in the asparagine biosynthetic pathway                                                                                                        |
| YKL211C | TRP3   | anthranilate synthase Component II and indole-3-phosphate (multifunctional enzyme)                                                                                                                                                              |
| YGR267C | FOL2   | GTP-cyclohydrolase I, catalyzes the first step in the folic acid biosynthetic pathway                                                                                                                                                           |
| YHR162W | None   |                                                                                                                                                                                                                                                 |
| YGL202W | ARO8   | Aromatic aminotransferase, expression is regulated by general control of amino acid biosynthesis                                                                                                                                                |
| YDR106W | ARP10  | Actin-related protein                                                                                                                                                                                                                           |
| YGL114W | None   |                                                                                                                                                                                                                                                 |
| YNR069C | BSC5   | Protein of unknown function, ORF exhibits genomic organization compatible with a translational readthrough-dependent mode of expression                                                                                                         |
| YJR109C | CPA2   | Large subunit of carbamoyl phosphate synthetase, which catalyzes a step in the synthesis of citrulline, an arginine precursor                                                                                                                   |

|         |       |                                                                                                                                                                                                                                       |
|---------|-------|---------------------------------------------------------------------------------------------------------------------------------------------------------------------------------------------------------------------------------------|
| YOR044W | None  |                                                                                                                                                                                                                                       |
| YOR108W | LEU9  | Alpha-isopropylmalate synthase II (2-isopropylmalate synthase), catalyzes the first step in the leucine biosynthesis pathway; the minor isozyme, responsible for the residual alpha-IPMS activity detected in a leu4 null mutant      |
| YJR148W | BAT2  | Cytosolic branched-chain amino acid aminotransferase, homolog of murine ECA39; highly expressed during stationary phase and repressed during logarithmic phase                                                                        |
| YIL116W | HIS5  | Histidinol-phosphate aminotransferase, catalyzes the seventh step in histidine biosynthesis; responsive to general control of amino acid biosynthesis; mutations cause histidine auxotrophy and sensitivity to Cu, Co, and Ni salts   |
| YDL198C | GGC1  | Mitochondrial GTP/GDP transporter, essential for mitochondrial genome maintenance; has a role in mitochondrial iron transport; member of the mitochondrial carrier family; (putative) mitochondrial carrier protein                   |
| YPR167C | MET16 | 3'-phosphoadenylsulfate reductase, reduces 3'-phosphoadenyl sulfate to adenosine-3',5'-bisphosphate and free sulfite using reduced thioredoxin as cosubstrate, involved in sulfate assimilation and methionine metabolism             |
| YOL119C | MCH4  | Protein with similarity to mammalian monocarboxylate permeases, which are involved in transport of monocarboxylic acids across the plasma membrane; mutant is not deficient in monocarboxylate transport                              |
| YKR069W | MET1  | S-adenosyl-L-methionine uroporphyrinogen III transmethylase, involved in sulfate assimilation, methionine metabolism, and siroheme biosynthesis                                                                                       |
| YJL213W | None  |                                                                                                                                                                                                                                       |
| YGR239C | PEX21 | Peroxin; Pex18p and Pex21p are partially functionally redundant                                                                                                                                                                       |
| YGR029W | ERV1  | Flavin-linked sulfhydryl oxidase localized to the mitochondrial intermembrane space, has a role in the maturation of cytosolic iron-sulfur proteins; ortholog of human hepatopoietin (ALR)                                            |
| YGL224C | SDT1  | Pyrimidine nucleotidase; overexpression suppresses the 6-AU sensitivity of transcription elongation factor S-II, as well as resistance to other pyrimidine derivatives                                                                |
| YDR481C | PHO8  | Repressible alkaline phosphatase, a glycoprotein localized to the vacuole; regulated by levels of inorganic phosphate and by a system consisting of Pho4p, Pho9p, Pho80p, Pho81p and Pho85p; dephosphorylates phosphotyrosyl peptides |
| YDL025C | None  |                                                                                                                                                                                                                                       |
| YOR337W | TEA1  | Mutants are defective in Ty1 Enhancer-mediated Activation; Ty1 enhancer activator                                                                                                                                                     |
| YPR059C | None  |                                                                                                                                                                                                                                       |
| YLR027C | AAT2  | Cytosolic aspartate aminotransferase, involved in nitrogen metabolism; localizes to peroxisomes in oleate-grown cells                                                                                                                 |
| YBR145W | ADH5  | alcohol dehydrogenase isoenzyme V                                                                                                                                                                                                     |
| YOL058W | ARG1  | Argininosuccinate synthetase, catalyzes the formation of L-argininosuccinate from citrulline and L-aspartate in the arginine biosynthesis pathway; potential Cdc28p substrate                                                         |
| YLL027W | ISA1  | Mitochondrial matrix protein involved in biogenesis of the iron-                                                                                                                                                                      |

|         |       |                                                                                                                                                                                                                                        |
|---------|-------|----------------------------------------------------------------------------------------------------------------------------------------------------------------------------------------------------------------------------------------|
|         |       | sulfur (Fe/S) cluster of Fe/S proteins, isa1 deletion causes loss of mitochondrial DNA and respiratory deficiency; depletion reduces growth on nonfermentable carbon sources                                                           |
| YGL059W | None  |                                                                                                                                                                                                                                        |
| YML116W | ATR1  | Multidrug efflux pump of the major facilitator superfamily, required for resistance to aminotriazole and 4-nitroquinoline-N-oxide                                                                                                      |
| YCR023C | None  |                                                                                                                                                                                                                                        |
| YHR006W | STP2  | Transcription factor, activated by proteolytic processing in response to signals from the SPS sensor system for external amino acids; activates transcription of amino acid permease genes                                             |
| YPL135W | ISU1  | Conserved protein of the mitochondrial matrix, performs a scaffolding function during assembly of iron-sulfur clusters, interacts physically and functionally with yeast frataxin (Yfh1p); isu1 isu2 double mutant is inviable         |
| YMR097C | MTG1  | Peripheral GTPase of the mitochondrial inner membrane, essential for respiratory competence, likely functions in assembly of the large ribosomal subunit, has homologs in plants and animals                                           |
| YDR127W | ARO1  | Pentafunctional arom protein, catalyzes steps 2 through 6 in the biosynthesis of chorismate, which is a precursor to aromatic amino acids                                                                                              |
| YOR130C | ORT1  | Ornithine transporter of the mitochondrial inner membrane, exports ornithine from mitochondria as part of arginine biosynthesis; human ortholog is associated with hyperammonaemia-hyperornithinaemia-homocitrullinuria (HHH) syndrome |
| YER128W | None  |                                                                                                                                                                                                                                        |
| YLR267W | BOP2  | Protein of unknown function, overproduction suppresses a pam1 slv3 double null mutation                                                                                                                                                |
| YDR035W | ARO3  | 3-deoxy-D-arabino-heptulosonate-7-phosphate (DAHP) synthase, catalyzes the first step in aromatic amino acid biosynthesis and is feedback-inhibited by phenylalanine                                                                   |
| YPL188W | POS5  | Mitochondrial NADH kinase, phosphorylates NADH; also phosphorylates NAD(+) with lower specificity; required for the response to oxidative stress                                                                                       |
| YDL054C | MCH1  | Protein with similarity to mammalian monocarboxylate permeases, which are involved in transport of monocarboxylic acids across the plasma membrane; mutant is not deficient in monocarboxylate transport                               |
| YNL311C | None  |                                                                                                                                                                                                                                        |
| YEL063C | CAN1  | arginine permease                                                                                                                                                                                                                      |
| YOL064C | MET22 | Bisphosphate-3'-nucleotidase, involved in salt tolerance and methionine biogenesis; dephosphorylates 3'-phosphoadenosine-5'-phosphate and 3'-phosphoadenosine-5'-phosphosulfate, intermediates of the sulfate assimilation pathway     |
| YHR071W | PCL5  | Cyclin, interacts with Pho85p cyclin-dependent kinase (Cdk), induced by Gcn4p at level of transcription, specifically required for Gcn4p degradation, may be sensor of cellular protein biosynthetic capacity                          |

|           |        |                                                                                                                                                                                                                                      |
|-----------|--------|--------------------------------------------------------------------------------------------------------------------------------------------------------------------------------------------------------------------------------------|
| YMR096W   | SNZ1   | Snooze: stationary phase-induced gene family; involved in cellular response to nutrient limitation and growth arrest; encodes highly conserved 35 kDa protein that shows increased expression after entry into stationary phase      |
| YJR130C   | STR2   | Cystathionine gamma-synthase, converts cysteine into cystathionine                                                                                                                                                                   |
| YER024W   | YAT2   | Carnitine acetyltransferase; has similarity to Yat1p, which is a carnitine acetyltransferase associated with the mitochondrial outer membrane                                                                                        |
| YER040W   | GLN3   | Transcriptional activator of genes regulated by nitrogen catabolite repression (NCR), localization and activity regulated by quality of nitrogen source                                                                              |
| YDL057W   | None   |                                                                                                                                                                                                                                      |
| YBR043C   | QDR3   | Protein of unknown function, may have a role in drug resistance                                                                                                                                                                      |
| YFL028C   | CAF16  | CCR4 associated factor; ABC ATPase                                                                                                                                                                                                   |
| YCL026C-A | FRM2   | Protein of unknown function, involved in the integration of lipid signaling pathways with cellular homeostasis                                                                                                                       |
| YPL092W   | SSU1   | putative sulfite pump; major facilitator superfamily protein                                                                                                                                                                         |
| YGL180W   | ATG1   | Protein serine/threonine kinase, required for autophagy and for the cytoplasm-to-vacuole targeting (Cvt) pathway                                                                                                                     |
| YER069W   | ARG5,6 | Bifunctional enzyme with N-acetyl-gamma-glutamyl-phosphate reductase and acetylglutamate kinase activities, catalyzes the second and third steps in the biosynthesis of the arginine precursor ornithine; forms a complex with Arg2p |
| YBR248C   | HIS7   | Imidazole glycerol phosphate synthase (glutamine amidotransferase:cyclase), catalyzes the fifth and sixth steps of histidine biosynthesis and also produces 5-aminoimidazole-4-carboxamide ribotide (AICAR), a purine precursor      |
| YBR256C   | RIB5   | Riboflavin synthase; catalyzes the last step of the riboflavin biosynthesis pathway                                                                                                                                                  |
| YLR089C   | ALT1   | putative alanine transaminase (glutamyl pyruvic transaminase)                                                                                                                                                                        |
| YPL033C   | None   |                                                                                                                                                                                                                                      |
| YGL186C   | TPN1   | Pyridoxine transporter                                                                                                                                                                                                               |
| YCR100C   | None   |                                                                                                                                                                                                                                      |
| YHR029C   | None   |                                                                                                                                                                                                                                      |
| YDR487C   | RIB3   | 3,4-dihydroxy-2-butanone-4-phosphate synthase (DHBP synthase), required for riboflavin biosynthesis from ribulose-5-phosphate, also has an unrelated function in mitochondrial respiration                                           |
| YER175C   | TMT1   | Trans-aconitate methyltransferase                                                                                                                                                                                                    |
| YJL200C   | None   |                                                                                                                                                                                                                                      |
| YDL182W   | LYS20  | Homocitrate synthase isozyme, catalyzes the condensation of acetyl-CoA and alpha-ketoglutarate to form homocitrate, which is the first step in the lysine biosynthesis pathway; highly similar to the other isozyme, Lys21p          |
| YJL071W   | ARG2   | Acetylglutamate synthase (glutamate N-acetyltransferase), mitochondrial enzyme that catalyzes the first step in the biosynthesis of the arginine precursor ornithine; forms a complex with Arg5,6p                                   |

|                              |       |                                                                                                                                                                                                                                                  |
|------------------------------|-------|--------------------------------------------------------------------------------------------------------------------------------------------------------------------------------------------------------------------------------------------------|
| YPL250C                      | ICY2  | Protein that interacts with the cytoskeleton and is involved in chromatin organization and nuclear transport, interacts genetically with TCP1 and ICY1; potential Cdc28p substrate                                                               |
| YIR034C                      | LYS1  | Saccharopine dehydrogenase (NAD <sup>+</sup> , L-lysine-forming), catalyzes the conversion of saccharopine to L-lysine, which is the final step in the lysine biosynthesis pathway                                                               |
| YGR288W                      | MAL13 | MAL-activator protein, part of complex locus MAL1; nonfunctional in genomic reference strain S288C                                                                                                                                               |
| (32) MODULE 37               |       |                                                                                                                                                                                                                                                  |
| <b>Expression regulators</b> |       |                                                                                                                                                                                                                                                  |
| YBL066C                      | SEF1  | Suppressor of Essential Function; putative transcription factor                                                                                                                                                                                  |
| YPL075W                      | GCR1  | Transcriptional activator of genes involved in glycolysis, functions and interacts with Gcr2p                                                                                                                                                    |
| YAL017W                      | PSK1  | One of two (see also PSK2) PAS domain containing S/T protein kinases; coordinately regulates protein synthesis and carbohydrate metabolism and storage in response to a unknown metabolite that reflects nutritional status                      |
| YJR127C                      | ZMS1  | Zinc-finger protein that localizes to the nucleus, putative transcriptional regulator of ALD6                                                                                                                                                    |
| YJR147W                      | HMS2  | Protein with similarity to heat shock transcription factors; overexpression suppresses the pseudohyphal filamentation defect of a diploid mep1 mep2 homozygous null mutant                                                                       |
| YKR099W                      | BAS1  | Myb-related transcription factor involved in regulating basal and induced expression of genes of the purine and histidine biosynthesis pathways                                                                                                  |
| YFL031W                      | HAC1  | bZIP transcription factor (ATF/CREB1 homolog) that regulates the unfolded-protein response, via UPRE binding, and membrane biogenesis; ER stress-induced splicing pathway utilizing Ire1p, Trl1p and Ada5p facilitates efficient Hac1p synthesis |
| <b>Module genes</b>          |       |                                                                                                                                                                                                                                                  |
| YML090W                      | None  |                                                                                                                                                                                                                                                  |
| YLR294C                      | None  |                                                                                                                                                                                                                                                  |
| YDR501W                      | PLM2  | Plasmid Maintenance; PLasmid Maintenance                                                                                                                                                                                                         |
| YBR039W                      | ATP3  | Gamma subunit of the F1 sector of mitochondrial F1F0 ATP synthase, which is a large, evolutionarily conserved enzyme complex required for ATP synthesis                                                                                          |
| YGL187C                      | COX4  | Subunit IV of cytochrome c oxidase, which is the terminal member of the mitochondrial inner membrane electron transport chain; N-terminal 25 residues of precursor are cleaved during mitochondrial import                                       |
| YKL085W                      | MDH1  | Mitochondrial malate dehydrogenase, catalyzes interconversion of malate and oxaloacetate; involved in the tricarboxylic acid (TCA) cycle                                                                                                         |
| YJR080C                      | FMP26 | The authentic, non-tagged protein was localized to the mitochondria                                                                                                                                                                              |
| YLR395C                      | COX8  | Subunit VIII of cytochrome c oxidase, which is the terminal member of the mitochondrial inner membrane electron transport chain                                                                                                                  |
| YML002W                      | None  |                                                                                                                                                                                                                                                  |



|         |       |                                                                                                                                                                                                                                                 |
|---------|-------|-------------------------------------------------------------------------------------------------------------------------------------------------------------------------------------------------------------------------------------------------|
| YDR178W | SDH4  | Membrane anchor subunit of succinate dehydrogenase (Sdh1p, Sdh2p, Sdh3p, Sdh4p), which couples the oxidation of succinate to the transfer of electrons to ubiquinone                                                                            |
| YNL037C | IDH1  | Subunit of mitochondrial NAD(+)-dependent isocitrate dehydrogenase, which catalyzes the oxidation of isocitrate to alpha-ketoglutarate in the TCA cycle                                                                                         |
| YLR038C | COX12 | Subunit VIb of cytochrome c oxidase, which is the terminal member of the mitochondrial inner membrane electron transport chain; required for assembly of fully active cytochrome c oxidase but not required for activity after assembly         |
| YGR174C | CBP4  | Essential for the expression and activity of ubiquinol-cytochrome c reductase; ubiquinol--cytochrome-c reductase assembly factor                                                                                                                |
| YGR182C | None  |                                                                                                                                                                                                                                                 |
| YBL030C | PET9  | Major ADP/ATP carrier of the mitochondrial inner membrane, exchanges cytosolic ADP for mitochondrially synthesized ATP; Pet9p and Sal1p have an overlapping function critical for viability                                                     |
| YLR295C | ATP14 | Subunit h of the F0 sector of mitochondrial F1F0 ATP synthase, which is a large, evolutionarily conserved enzyme complex required for ATP synthesis                                                                                             |
| YKL141W | SDH3  | Cytochrome b subunit of succinate dehydrogenase (Sdh1p, Sdh2p, Sdh3p, Sdh4p), which couples the oxidation of succinate to the transfer of electrons to ubiquinone                                                                               |
| YKL109W | HAP4  | Subunit of the heme-activated, glucose-repressed Hap2p/3p/4p/5p CCAAT-binding complex, a transcriptional activator and global regulator of respiratory gene expression; provides the principal activation function of the complex               |
| YML120C | NDI1  | NADH:ubiquinone oxidoreductase, transfers electrons from NADH to ubiquinone in the respiratory chain but does not pump protons, in contrast to the higher eukaryotic multisubunit respiratory complex I which is absent in <i>S. cerevisiae</i> |
| YGL188C | None  |                                                                                                                                                                                                                                                 |
| YJR077C | MIR1  | Mitochondrial phosphate carrier, imports inorganic phosphate into mitochondria; functionally redundant with Pic2p but more abundant than Pic2 under normal conditions                                                                           |
| YPR020W | ATP20 | Subunit g of the mitochondrial F1F0 ATP synthase, which is a large enzyme complex required for ATP synthesis; associated only with the dimeric form of ATP synthase                                                                             |
| YNL052W | COX5A | Subunit Va of cytochrome c oxidase, which is the terminal member of the mitochondrial inner membrane electron transport chain; predominantly expressed during aerobic growth while its isoform Vb (Cox5Bp) is expressed during anaerobic growth |
| YMR256C | COX7  | Subunit VII of cytochrome c oxidase, which is the terminal member of the mitochondrial inner membrane electron transport chain                                                                                                                  |
| YFR033C | QCR6  | ubiquinol-cytochrome c oxidoreductase subunit 6 (17 kDa)                                                                                                                                                                                        |
| YKR016W | FMP13 | The authentic, non-tagged protein was localized to the mitochondria                                                                                                                                                                             |
| YEL024W | RIP1  | oxidizes ubiquinol at center P in the protonmotive Q cycle mechanism, transferring one electron to cytochrome c1 and                                                                                                                            |

|           |       |                                                                                                                                                                                                                                                |
|-----------|-------|------------------------------------------------------------------------------------------------------------------------------------------------------------------------------------------------------------------------------------------------|
|           |       | generating a low-potential ubisemiquinone anion which reduces the low-potential cytochrome b-566 heme group; Rieske iron-sulfur protein of the mitochondrial cytochrome bc1 complex                                                            |
| YDR148C   | KGD2  | Dihydrolipoyl transsuccinylase, a component of the mitochondrial alpha-ketoglutarate dehydrogenase complex, which catalyzes a step in the tricarboxylic acid (TCA) cycle, the oxidative decarboxylation of alpha-ketoglutarate to succinyl-CoA |
| YML081C-A | ATP18 | Subunit of the mitochondrial F1F0 ATP synthase, which is a large enzyme complex required for ATP synthesis; termed subunit I or subunit j; does not correspond to known ATP synthase subunits in other organisms                               |
| YGR183C   | QCR9  | 7.3 kDa subunit 9 of the ubiquinol cytochrome c oxidoreductase complex                                                                                                                                                                         |
| YBR085W   | AAC3  | Mitochondrial inner membrane ADP/ATP translocator, exchanges cytosolic ADP for mitochondrially synthesized ATP; expressed under anaerobic conditions; similar to Pet9p and Aac1p; has roles in maintenance of viability and in respiration     |
| YPL271W   | ATP15 | Epsilon subunit of the F1 sector of mitochondrial F1F0 ATP synthase, which is a large, evolutionarily conserved enzyme complex required for ATP synthesis                                                                                      |
| YGL191W   | COX13 | Subunit VIa of cytochrome c oxidase, which is the terminal member of the mitochondrial inner membrane electron transport chain; not essential for cytochrome c oxidase activity but may modulate activity in response to ATP                   |
| YMR002W   | None  |                                                                                                                                                                                                                                                |
| YKL148C   | SDH1  | Flavoprotein subunit of succinate dehydrogenase (Sdh1p, Sdh2p, Sdh3p, Sdh4p), which couples the oxidation of succinate to the transfer of electrons to ubiquinone                                                                              |
| YLR299W   | ECM38 | Gamma-glutamyltranspeptidase, major glutathione-degrading enzyme; expression induced mainly by nitrogen starvation                                                                                                                             |
| YBL099W   | ATP1  | Alpha subunit of the F1 sector of mitochondrial F1F0 ATP synthase, which is a large, evolutionarily conserved enzyme complex required for ATP synthesis                                                                                        |
| YHR001W-A | QCR10 | 8.5 kDa subunit of the ubiquinol-cytochrome c oxidoreductase complex                                                                                                                                                                           |
| YLR168C   | None  |                                                                                                                                                                                                                                                |
| YJL166W   | QCR8  | Ubiquinol cytochrome-c reductase subunit 8 (11 kDa protein)                                                                                                                                                                                    |
| YJR120W   | None  |                                                                                                                                                                                                                                                |
| YOR065W   | CYT1  | Cytochrome c1                                                                                                                                                                                                                                  |
| YDL004W   | ATP16 | Delta subunit of the central stalk of mitochondrial F1F0 ATP synthase, which is a large, evolutionarily conserved enzyme complex required for ATP synthesis                                                                                    |
| YIL125W   | KGD1  | Component of the mitochondrial alpha-ketoglutarate dehydrogenase complex, which catalyzes a key step in the tricarboxylic acid (TCA) cycle, the oxidative decarboxylation of alpha-ketoglutarate to form succinyl-CoA                          |
| YJL103C   | None  |                                                                                                                                                                                                                                                |
| YDL181W   | INH1  | Protein that inhibits ATP hydrolysis by the F1F0-ATP synthase, inhibitory function is enhanced by stabilizing proteins Stf1p and                                                                                                               |

|                              |       |                                                                                                                                                                                                                                                  |
|------------------------------|-------|--------------------------------------------------------------------------------------------------------------------------------------------------------------------------------------------------------------------------------------------------|
|                              |       | Stf2p; has similarity to Stf1p and both Inh1p and Stf1p exhibit the potential to form coiled-coil structures                                                                                                                                     |
| YLR304C                      | ACO1  | Mitochondrial aconitase, required for the tricarboxylic acid (TCA) cycle; mutation leads to glutamate auxotrophy                                                                                                                                 |
| YKL016C                      | ATP7  | Subunit d of the stator stalk of mitochondrial F1F0 ATP synthase, which is a large, evolutionarily conserved enzyme complex required for ATP synthesis                                                                                           |
| YLL041C                      | SDH2  | Iron-sulfur protein subunit of succinate dehydrogenase (Sdh1p, Sdh2p, Sdh3p, Sdh4p), which couples the oxidation of succinate to the transfer of electrons to ubiquinone                                                                         |
| YDR298C                      | ATP5  | Subunit 5 of the stator stalk of mitochondrial F1F0 ATP synthase, which is a large, evolutionarily conserved enzyme complex required for ATP synthesis; homologous to bovine subunit OSCP (oligomycin sensitivity-conferring protein)            |
| YDR322C-A                    | TIM11 | Protein associated with mitochondrial ATP synthase; essential for dimeric state of ATP synthase. ; subunit e of mitochondrial F1F0-ATPase                                                                                                        |
| YBL100C                      | None  |                                                                                                                                                                                                                                                  |
| YHR051W                      | COX6  | Subunit VI of cytochrome c oxidase, which is the terminal member of the mitochondrial inner membrane electron transport chain; expression is regulated by oxygen levels                                                                          |
| YJL102W                      | MEF2  | mitochondrial elongation factor G-like protein                                                                                                                                                                                                   |
| YPR191W                      | QCR2  | 40 kDa ubiquinol cytochrome-c reductase core protein 2                                                                                                                                                                                           |
| YCL058C                      | FYV5  | Protein of unknown function, required for survival upon exposure to K1 killer toxin; involved in ion homeostasis                                                                                                                                 |
| YJR121W                      | ATP2  | Beta subunit of the F1 sector of mitochondrial F1F0 ATP synthase, which is a large, evolutionarily conserved enzyme complex required for ATP synthesis                                                                                           |
| YDR377W                      | ATP17 | Subunit f of the F0 sector of mitochondrial F1F0 ATP synthase, which is a large, evolutionarily conserved enzyme complex required for ATP synthesis                                                                                              |
| YDL067C                      | COX9  | Subunit VIIa of cytochrome c oxidase, which is the terminal member of the mitochondrial inner membrane electron transport chain                                                                                                                  |
| YBL045C                      | COR1  | Core subunit of the ubiquinol-cytochrome c reductase complex (bc1 complex), which is a component of the mitochondrial inner membrane electron transport chain                                                                                    |
| YPL078C                      | ATP4  | Subunit b of the stator stalk of mitochondrial F1F0 ATP synthase, which is a large, evolutionarily conserved enzyme complex required for ATP synthesis                                                                                           |
| (33) MODULE 38               |       |                                                                                                                                                                                                                                                  |
| <b>Expression regulators</b> |       |                                                                                                                                                                                                                                                  |
| YOR304W                      | ISW2  | Member of the imitation-switch (ISWI) class of ATP-dependent chromatin remodeling complexes; ATPase component that, with Itc1p, forms a complex required for repression of a-specific genes, INO1, and early meiotic genes during mitotic growth |
| YIL147C                      | SLN1  | Histidine kinase osmosensor that regulates a MAP kinase cascade; transmembrane protein with an intracellular kinase domain that signals to Ypd1p and Ssk1p, thereby forming a phosphorelay system similar to bacterial two-component regulators  |

|                            |       |                                                                                                                                                                                                                                                 |
|----------------------------|-------|-------------------------------------------------------------------------------------------------------------------------------------------------------------------------------------------------------------------------------------------------|
| YIL147C                    | SLN1  | Histidine kinase osmosensor that regulates a MAP kinase cascade; transmembrane protein with an intracellular kinase domain that signals to Ypd1p and Ssk1p, thereby forming a phosphorelay system similar to bacterial two-component regulators |
| YIL147C                    | SLN1  | Histidine kinase osmosensor that regulates a MAP kinase cascade; transmembrane protein with an intracellular kinase domain that signals to Ypd1p and Ssk1p, thereby forming a phosphorelay system similar to bacterial two-component regulators |
| YOR230W                    | WTM1  | WD repeat containing transcriptional modulator 1;<br>Transcriptional modulator                                                                                                                                                                  |
| YKL062W                    | MSN4  | Transcriptional activator related to Msn2p; activated in stress conditions, which results in translocation from the cytoplasm to the nucleus; binds DNA at stress response elements of responsive genes, inducing gene expression               |
| <b>Genotype regulators</b> |       |                                                                                                                                                                                                                                                 |
| M4_85846_106892            |       | ARF1(0,3) YDL193W SNF3(12,2) SEC31(6,4) YDL196W ASF2(9,4) GGC1(0,4) YDL199C MGT1(3,0) TRM8(0,4) MRPL11(0,4) YDL203C RTN2(0,5) HEM3(0,5) YDL206W GLE1(4,5) NHP2(1,2) CWC2(1,2) UGA4(1,9) YDL211C SHR3(1,3) NOP6(0,3)                             |
| <b>Module genes</b>        |       |                                                                                                                                                                                                                                                 |
| YFL002W-A                  | None  |                                                                                                                                                                                                                                                 |
| YBL005W-B                  | None  |                                                                                                                                                                                                                                                 |
| YBL101W-B                  | None  |                                                                                                                                                                                                                                                 |
| YMR046C                    | None  |                                                                                                                                                                                                                                                 |
| YLR035C-A                  | None  |                                                                                                                                                                                                                                                 |
| YHR214C-B                  | None  |                                                                                                                                                                                                                                                 |
| YFL035C-A                  | None  |                                                                                                                                                                                                                                                 |
| YDL230W                    | PTP1  | phosphotyrosine-specific protein phosphatase                                                                                                                                                                                                    |
| YBL107W-A                  | None  |                                                                                                                                                                                                                                                 |
| YMR050C                    | None  |                                                                                                                                                                                                                                                 |
| YDR283C                    | GCN2  | Protein kinase, phosphorylates the alpha-subunit of translation initiation factor eIF2 (Sui2p) in response to starvation; activated by uncharged tRNAs and the Gcn1p-Gcn20p complex                                                             |
| YCR018C-A                  | None  |                                                                                                                                                                                                                                                 |
| YJR026W                    | None  |                                                                                                                                                                                                                                                 |
| YEL069C                    | HXT13 | Protein of unknown function with similarity to hexose transporter family members, expression is induced by low levels of glucose and repressed by high levels of glucose                                                                        |
| YLR334C                    | None  |                                                                                                                                                                                                                                                 |
| YMR158C-B                  | None  |                                                                                                                                                                                                                                                 |
| YCR032W                    | BPH1  | Protein homologous to human Chediak-Higashi syndrome protein and murine beige gene, which are implicated in disease syndromes due to defective lysosomal trafficking                                                                            |
| YDR170W-A                  | None  |                                                                                                                                                                                                                                                 |
| YDR034C-A                  | None  |                                                                                                                                                                                                                                                 |

|           |       |                                                                                                                                                                                                                                      |
|-----------|-------|--------------------------------------------------------------------------------------------------------------------------------------------------------------------------------------------------------------------------------------|
| YER160C   | None  |                                                                                                                                                                                                                                      |
| YML039W   | None  |                                                                                                                                                                                                                                      |
| YJR039W   | None  |                                                                                                                                                                                                                                      |
| YAL001C   | TFC3  | transcription factor tau (TFIIIC) subunit 138                                                                                                                                                                                        |
| YER138W-A | None  |                                                                                                                                                                                                                                      |
| YJR027W   | None  |                                                                                                                                                                                                                                      |
| YBR013C   | None  |                                                                                                                                                                                                                                      |
| YKL215C   | None  |                                                                                                                                                                                                                                      |
| YBR012W-B | None  |                                                                                                                                                                                                                                      |
| YBL005W-A | None  |                                                                                                                                                                                                                                      |
| YML049C   | RSE1  | RNA splicing and ER to Golgi transport; involved in secretion and RNA splicing                                                                                                                                                       |
| YMR046W-A | None  |                                                                                                                                                                                                                                      |
| YMR308C   | PSE1  | Karyopherin/importin that interacts with the nuclear pore complex; acts as the nuclear import receptor for specific proteins, including Pdr1p, Yap1p, Ste12p, and Aft1p                                                              |
| YAR009C   | None  |                                                                                                                                                                                                                                      |
| YGR122C-A | None  |                                                                                                                                                                                                                                      |
| YCL019W   | None  |                                                                                                                                                                                                                                      |
| YDL246C   | SOR2  | Protein of unknown function, computational analysis of large-scale protein-protein interaction data suggests a possible role in fructose or mannose metabolism                                                                       |
| YIL015C-A | None  |                                                                                                                                                                                                                                      |
| YHR102W   | KIC1  | Protein kinase of the PAK/Ste20 kinase family, required for cell integrity possibly through regulating 1,6-beta-glucan levels in the wall; physically interacts with Cdc31p (centrin), which is a component of the spindle pole body |
| YML040W   | None  |                                                                                                                                                                                                                                      |
| YOL106W   | None  |                                                                                                                                                                                                                                      |
| YJL007C   | None  |                                                                                                                                                                                                                                      |
| YMR176W   | ECM5  | Non-essential protein of unknown function, contains ATP/GTP-binding site motif A; null mutant exhibits cellular volume up to four times greater than wild-type, also large drooping buds with elongated necks                        |
| YER138C   | None  |                                                                                                                                                                                                                                      |
| YMR045C   | None  |                                                                                                                                                                                                                                      |
| YML045W   | None  |                                                                                                                                                                                                                                      |
| YJR029W   | None  |                                                                                                                                                                                                                                      |
| YAR029W   | None  |                                                                                                                                                                                                                                      |
| YMR128W   | ECM16 | Essential DEAH-box ATP-dependent RNA helicase specific to the U3 snoRNP, predominantly nucleolar in distribution, required for 18S rRNA synthesis                                                                                    |
| YDL243C   | AAD4  | Putative aryl-alcohol dehydrogenase with similarity to P. chrysosporium aryl-alcohol dehydrogenase, involved in the oxidative stress response                                                                                        |
| YAL002W   | VPS8  | involved in vacuolar protein sorting; required for localization and trafficking of the CPY sorting receptor; Vps8p is a                                                                                                              |

|                              |        |                                                                                                                                                                                                                                                 |
|------------------------------|--------|-------------------------------------------------------------------------------------------------------------------------------------------------------------------------------------------------------------------------------------------------|
|                              |        | membrane-associated hydrophilic protein which contains a C-terminal cysteine-rich region that conforms to the H2 variant of the RING finger Zn <sup>2+</sup> binding motif.                                                                     |
| YOL051W                      | GAL11  | Component of the Mediator complex; interacts with RNA polymerase II and the general transcription factors to form the RNA polymerase II holoenzyme; affects transcription by acting as target of activators and repressors                      |
| YGL094C                      | PAN2   | Essential subunit of the Pan2p-Pan3p poly(A)-ribonuclease complex, which acts to control poly(A) tail length and regulate the stoichiometry and activity of postreplication repair complexes                                                    |
| YHL045W                      | None   |                                                                                                                                                                                                                                                 |
| YCL069W                      | None   |                                                                                                                                                                                                                                                 |
| YLR225C                      | None   |                                                                                                                                                                                                                                                 |
| YPR002C-A                    | None   |                                                                                                                                                                                                                                                 |
| (34) MODULE 39               |        |                                                                                                                                                                                                                                                 |
| <b>Expression regulators</b> |        |                                                                                                                                                                                                                                                 |
| YBR274W                      | CHK1   | checkpoint kinase 1; homolog of the <i>S. pombe</i> and mammalian Chk1 checkpoint kinases; Protein kinase Chk1                                                                                                                                  |
| YHL027W                      | RIM101 | Transcriptional activator required for entry into meiosis, has similarity to the <i>Aspergillus</i> Phenotype-response regulator PacC and the <i>Yarrowia</i> proteinase YIRim1010p; Meiotic regulatory protein; Cys-His zinc fingers           |
| YAL017W                      | PSK1   | One of two (see also PSK2) PAS domain containing S/T protein kinases; coordinately regulates protein synthesis and carbohydrate metabolism and storage in response to a unknown metabolite that reflects nutritional status                     |
| YDR034C                      | LYS14  | Transcriptional activator involved in regulation of genes of the lysine biosynthesis pathway; requires 2-aminoadipate semialdehyde as co-inducer                                                                                                |
| YDR496C                      | PUF6   | member of the PUF protein family; YDR496C                                                                                                                                                                                                       |
| YNL180C                      | RHO5   | Non-essential small GTPase of the Rho/Rac subfamily of Ras-like proteins, likely involved in protein kinase C (Pkc1p)-dependent signal transduction pathway that controls cell integrity                                                        |
| <b>Module genes</b>          |        |                                                                                                                                                                                                                                                 |
| YBR140C                      | IRA1   | GTPase-activating protein that negatively regulates RAS by converting it from the GTP- to the GDP-bound inactive form, required for reducing cAMP levels under nutrient limiting conditions, mediates membrane association of adenylate cyclase |
| YBR036C                      | CSG2   | Endoplasmic reticulum membrane protein, required for mannosylation of inositolphosphorylceramide and for growth at high calcium concentrations                                                                                                  |
| YBR171W                      | SEC66  | glycoprotein complexed with Sec62p and Sec63p in the Sec63 complex, an integral endoplasmic reticulum membrane protein complex required for translocation of presecretory proteins                                                              |
| YBR235W                      | None   |                                                                                                                                                                                                                                                 |
| YBL101C                      | ECM21  | Non-essential protein of unknown function; promoter contains several Gcn4p binding elements                                                                                                                                                     |
| YBL094C                      | None   |                                                                                                                                                                                                                                                 |

|         |       |                                                                                                                                                                                                                                                                                                                                                                |
|---------|-------|----------------------------------------------------------------------------------------------------------------------------------------------------------------------------------------------------------------------------------------------------------------------------------------------------------------------------------------------------------------|
| YBR008C | FLR1  | Plasma membrane multidrug transporter, member of the major facilitator superfamily; involved in efflux of fluconazole, diazaborine, benomyl, methotrexate, and other drugs                                                                                                                                                                                     |
| YBR151W | APD1  | Protein of unknown function, required for normal localization of actin patches and for normal tolerance of sodium ions and hydrogen peroxide; localizes to both cytoplasm and nucleus                                                                                                                                                                          |
| YBR071W | None  |                                                                                                                                                                                                                                                                                                                                                                |
| YBL066C | SEF1  | Suppressor of Essential Function; putative transcription factor                                                                                                                                                                                                                                                                                                |
| YBL074C | AAR2  | Component of the U5 snRNP, required for splicing of U3 precursors; originally described as a splicing factor specifically required for splicing pre-mRNA of the MATa1 cistron                                                                                                                                                                                  |
| YBL089W | AVT5  | Putative transporter, member of a family of seven <i>S. cerevisiae</i> genes (AVT1-7) related to vesicular GABA-glycine transporters                                                                                                                                                                                                                           |
| YBR173C | UMP1  | Involved in ubiquitin-mediated proteolysis; 20S proteasome maturation factor                                                                                                                                                                                                                                                                                   |
| YBR096W | None  |                                                                                                                                                                                                                                                                                                                                                                |
| YBR221C | PDB1  | E1 beta subunit of the pyruvate dehydrogenase (PDH) complex, which is an evolutionarily-conserved multi-protein complex found in mitochondria                                                                                                                                                                                                                  |
| YBL022C | PIM1  | mitochondrial ATP-dependent protease                                                                                                                                                                                                                                                                                                                           |
| YBR136W | MEC1  | Central regulator of the Mec1p/Tel1p signaling network; required for mitotic growth, DNA repair and mitotic recombination, regulates phosphorylation of Rad53p, required for dmc1 arrest and meiotic recombination; similar to phosphatidylinositol(PI)3-kinases required for DNA damage induced checkpoint responses in G1, S/M, intra S, and G2/M in mitosis |
| YBR297W | MAL33 | MAL-activator protein, part of complex locus MAL3; nonfunctional in genomic reference strain S288C                                                                                                                                                                                                                                                             |
| YBL098W | BNA4  | Kynurenine 3-mono oxygenase, required for biosynthesis of nicotinic acid from tryptophan via kynurenine pathway                                                                                                                                                                                                                                                |
| YBR108W | None  |                                                                                                                                                                                                                                                                                                                                                                |
| YBR212W | NGR1  | negative growth regulatory protein                                                                                                                                                                                                                                                                                                                             |
| YBR086C | IST2  | Plasma membrane protein that may be involved in osmotolerance, localizes to the mother cell in small-budded cells and to the bud in medium- and large-budded cells; mRNA is transported to the bud tip by an actomyosin-driven process                                                                                                                         |
| YBR293W | None  |                                                                                                                                                                                                                                                                                                                                                                |
| YBL047C | EDE1  | Key endocytic protein involved in a network of interactions with other endocytic proteins, binds membranes in a ubiquitin-dependent manner, may also bind ubiquitinated membrane-associated proteins                                                                                                                                                           |
| YDR264C | AKR1  | Negative regulator of pheromone response pathway; required for endocytosis of pheromone receptors; involved in cell shape control; Ankyrin repeat-containing protein                                                                                                                                                                                           |
| YBR138C | None  |                                                                                                                                                                                                                                                                                                                                                                |
| YBR170C | NPL4  | Endoplasmic reticulum and nuclear membrane protein, forms a complex with Cdc48p and Ufd1p that recognizes ubiquitinated proteins in the endoplasmic reticulum and delivers them to the proteasome for degradation                                                                                                                                              |

|         |       |                                                                                                                                                                                                                        |
|---------|-------|------------------------------------------------------------------------------------------------------------------------------------------------------------------------------------------------------------------------|
| YBR234C | ARC40 | Arp2/3 complex subunit, 40 kilodalton; component of Arp2/Arp3 protein complex                                                                                                                                          |
| YBR016W | None  |                                                                                                                                                                                                                        |
| YBL107C | None  |                                                                                                                                                                                                                        |
| YPL148C | PPT2  | Phosphopantetheine:protein transferase (PPTase), activates mitochondrial acyl carrier protein (Acp1p) by phosphopantetheinylation                                                                                      |
| YBR020W | GAL1  | Galactokinase, phosphorylates alpha-D-galactose to alpha-D-galactose-1-phosphate in the first step of galactose catabolism; expression regulated by Gal4p                                                              |
| YBR222C | PCS60 | Peroxisomal AMP-binding protein, localizes to both the peroxisomal peripheral membrane and matrix, expression is highly inducible by oleic acid, similar to E. coli long chain acyl-CoA synthetase                     |
| YBL007C | SLA1  | Cytoskeletal protein binding protein required for assembly of the cortical actin cytoskeleton; contains 3 SH3 domains; interacts with proteins regulating actin dynamics and with proteins required for endocytosis    |
| YBR291C | CTP1  | Mitochondrial inner membrane citrate transporter, member of the mitochondrial carrier family                                                                                                                           |
| YBR225W | None  |                                                                                                                                                                                                                        |
| YBL084C | CDC27 | Subunit of the Anaphase-Promoting Complex/Cyclosome (APC/C), which is a ubiquitin-protein ligase required for degradation of anaphase inhibitors, including mitotic cyclins, during the metaphase/anaphase transition  |
| YBL102W | SFT2  | similar to mammalian syntaxin 5                                                                                                                                                                                        |
| YOR275C | RIM20 | Regulator of IME2                                                                                                                                                                                                      |
| YBR041W | FAT1  | Fatty acid transporter and very long-chain fatty acyl-CoA synthetase, may form a complex with Faa1p or Faa4p that imports and activates exogenous fatty acids                                                          |
| YBR059C | AKL1  | Serine-threonine protein kinase, member (with Ark1p and Prk1p) of the Ark kinase family                                                                                                                                |
| YBR223C | TDP1  | Tyrosine-DNA Phosphodiesterase                                                                                                                                                                                         |
| YBR055C | PRP6  | Splicing factor, component of the U4/U6-U5 snRNP complex                                                                                                                                                               |
| YBR005W | RCR1  | Endoplasmic reticulum membrane protein whose overproduction confers resistance to Congo Red                                                                                                                            |
| YBR019C | GAL10 | UDP-glucose-4-epimerase, catalyzes the interconversion of UDP-galactose and UDP-D-glucose in galactose metabolism; also catalyzes the conversion of alpha-D-glucose or alpha-D-galactose to their beta-anomers         |
| YBR211C | AME1  | associated with microtubules and essential; regulator of microtubule stability                                                                                                                                         |
| YJR037W | None  |                                                                                                                                                                                                                        |
| YBR111C | YSA1  | Protein with weak similarity to D. melanogaster serendipity protein and X. laevis basis fibroblast growth factor                                                                                                       |
| YBR007C | DSF2  | None                                                                                                                                                                                                                   |
| YBR038W | CHS2  | Chitin synthase II, requires activation from zymogenic form in order to catalyze the transfer of N-acetylglucosamine (GlcNAc) to chitin; required for the synthesis of chitin in the primary septum during cytokinesis |



|                              |       |                                                                                                                                                                                                                                                |
|------------------------------|-------|------------------------------------------------------------------------------------------------------------------------------------------------------------------------------------------------------------------------------------------------|
| YBR295W                      | PCA1  | P-type metal-transporting ATPase with a role in copper and iron homeostasis; R970G-substitution in the C-terminal region confers cadmium resistance                                                                                            |
| YBR287W                      | ZSP1  | None                                                                                                                                                                                                                                           |
| YJR091C                      | JSN1  | Member of the Puf family of RNA-binding proteins, interacts with mRNAs encoding membrane-associated proteins; overexpression suppresses a tub2-150 mutation and causes increased sensitivity to benomyl in wild-type cells                     |
| YPR002W                      | PDH1  | Mitochondrial protein that participates in respiration, induced by diauxic shift; homologous to E. coli PrpD, may take part in the conversion of 2-methylcitrate to 2-methylisocitrate                                                         |
| YBR255W                      | None  |                                                                                                                                                                                                                                                |
| YBL033C                      | RIB1  | GTP cyclohydrolase II; catalyzes the first step of the riboflavin biosynthesis pathway                                                                                                                                                         |
| YBL017C                      | PEP1  | Type I transmembrane sorting receptor for multiple vacuolar hydrolases; cycles between the late-Golgi and prevacuolar endosome-like compartments                                                                                               |
| (35) MODULE 40               |       |                                                                                                                                                                                                                                                |
| <b>Expression regulators</b> |       |                                                                                                                                                                                                                                                |
| YGL180W                      | ATG1  | Protein serine/threonine kinase, required for autophagy and for the cytoplasm-to-vacuole targeting (Cvt) pathway                                                                                                                               |
| YOR224C                      | RPB8  | RNA polymerase subunit, found in RNA polymerase complexes I, II, and III                                                                                                                                                                       |
| YGR097W                      | ASK10 | Component of the RNA polymerase II holoenzyme, phosphorylated in response to oxidative stress; has a role in destruction of Ssn8p, which relieves repression of stress-response genes                                                          |
| YCL055W                      | KAR4  | Transcription factor required for induction of KAR3 and CIK1 during mating, also required during meiosis; exists in two forms, a slower-migrating form more abundant during vegetative growth and a faster-migrating form induced by pheromone |
| YJL089W                      | SIP4  | Possibly involved in Snf1p regulated transcriptional activation; shows homology to DNA binding domain of Gal4p, has a leucine zipper motif and acidic region; lexA-Sip4p activates transcription                                               |
| YCL055W                      | KAR4  | Transcription factor required for induction of KAR3 and CIK1 during mating, also required during meiosis; exists in two forms, a slower-migrating form more abundant during vegetative growth and a faster-migrating form induced by pheromone |
| YJR122W                      | CAF17 | Mitochondrial protein that interacts with Ccr4p in the two-hybrid system; 3'-untranslated region contains a putative mRNA localization element common to genes encoding mitochondrial proteins                                                 |
| <b>Module genes</b>          |       |                                                                                                                                                                                                                                                |
| YBR010W                      | HHT1  | One of two identical histone H3 proteins (see also HHT2); core histone required for chromatin assembly, involved in heterochromatin-mediated telomeric and HM silencing; regulated by acetylation, methylation, and mitotic phosphorylation    |
| YNL024C                      | None  |                                                                                                                                                                                                                                                |

|         |      |                                                                                                                                                                                                                                                |
|---------|------|------------------------------------------------------------------------------------------------------------------------------------------------------------------------------------------------------------------------------------------------|
| YBR177C | EHT1 | Possible serine hydrolase, may be involved in lipid metabolism, null mutant slightly temperature sensitive at 37C                                                                                                                              |
| YGL225W | VRG4 | May regulate Golgi function and glycosylation in Golgi; Golgi GDP-mannose transporter                                                                                                                                                          |
| YDR225W | HTA1 | One of two nearly identical (see also HTA2) histone H2A subtypes; core histone required for chromatin assembly and chromosome function; DNA damage-dependent phosphorylation by Mec1p facilitates DNA repair; acetylated by Nat4p              |
| YER070W | RNR1 | Ribonucleotide-diphosphate reductase (RNR), large subunit; the RNR complex catalyzes the rate-limiting step in dNTP synthesis and is regulated by DNA replication and DNA damage checkpoint pathways via localization of the small subunits    |
| YLR112W | None |                                                                                                                                                                                                                                                |
| YPL127C | HHO1 | Histone H1, a linker histone required for nucleosome packaging at restricted sites; suppresses DNA repair involving homologous recombination; not required for telomeric silencing, basal transcriptional repression, or efficient sporulation |
| YBR009C | HHF1 | One of two identical histone H4 proteins (see also HHF2); core histone required for chromatin assembly and chromosome function; contributes to telomeric silencing; N-terminal domain involved in maintaining genomic integrity                |
| YML027W | YOX1 | Homeodomain-containing transcriptional repressor, binds to Mcm1p and to early cell cycle boxes (ECBs) in the promoters of cell cycle-regulated genes expressed in M/G1 phase; expression is cell cycle-regulated; potential Cdc28p substrate   |
| YDR222W | None |                                                                                                                                                                                                                                                |
| YMR199W | CLN1 | role in cell cycle START; G(sub)1 cyclin                                                                                                                                                                                                       |
| YBR070C | None |                                                                                                                                                                                                                                                |
| YDR224C | HTB1 | One of two nearly identical (see HTB2) histone H2B subtypes required for chromatin assembly and chromosome function; Rad6p-Bre1p-Lge1p mediated ubiquitination regulates transcriptional activation, meiotic DSB formation and H3 methylation  |
| YIL016W | SNL1 | Integral membrane protein containing a Bag domain; suppressor of nup116-C lethal                                                                                                                                                               |
| YBL003C | HTA2 | One of two nearly identical (see also HTA1) histone H2A subtypes; core histone required for chromatin assembly and chromosome function; DNA damage-dependent phosphorylation by Mec1p facilitates DNA repair; acetylated by Nat4p              |
| YML052W | SUR7 | Multicopy suppressor of rvs167 mutation; putative integral membrane protein                                                                                                                                                                    |
| YOL007C | None |                                                                                                                                                                                                                                                |
| YCR034W | FEN1 | Fatty acid elongase, involved in sphingolipid biosynthesis; acts on fatty acids of up to 24 carbons in length; mutations have regulatory effects on 1,3-beta-glucan synthase, vacuolar ATPase, and the secretory pathway                       |
| YBL002W | HTB2 | One of two nearly identical (see HTB2) histone H2B subtypes required for chromatin assembly and chromosome function; Rad6p-Bre1p-Lge1p mediated ubiquitination regulates transcriptional activation, meiotic DSB formation and H3 methylation  |

|                            |       |                                                                                                                                                                                                                                                                                         |
|----------------------------|-------|-----------------------------------------------------------------------------------------------------------------------------------------------------------------------------------------------------------------------------------------------------------------------------------------|
| YMR292W                    | GOT1  | Golgi Transport; membrane protein                                                                                                                                                                                                                                                       |
| YOR045W                    | TOM6  | involved in supporting the cooperativity between receptors and the general insertion pore and facilitating the release of preproteins from import components; outer mitochondrial membrane protein, component of the mitochondrial protein translocation complex, associates with TOM40 |
| YOR067C                    | ALG8  | adds glucose to the dolichol-linked oligosaccharide precursor prior to transfer to protein; glycosyl transferase                                                                                                                                                                        |
| YMR003W                    | None  |                                                                                                                                                                                                                                                                                         |
| YOR101W                    | RAS1  | ras proto-oncogene homolog                                                                                                                                                                                                                                                              |
| YNL031C                    | HHT2  | One of two identical histone H3 proteins (see also HHT1); core histone required for chromatin assembly, involved in heterochromatin-mediated telomeric and HM silencing; regulated by acetylation, methylation, and mitotic phosphorylation                                             |
| YHR153C                    | SPO16 | Protein of unknown function, required for spore formation                                                                                                                                                                                                                               |
| YPL144W                    | None  |                                                                                                                                                                                                                                                                                         |
| YPR052C                    | NHP6A | Homologous to mammalian high mobility group proteins 1 and 2; functions redundantly with the highly homologous gene, NHP6B; high-mobility group non-histone chromatin protein; 11-kDa nonhistone chromosomal protein                                                                    |
| YMR318C                    | ADH6  | NADPH-dependent alcohol dehydrogenase                                                                                                                                                                                                                                                   |
| YNL030W                    | HHF2  | One of two identical histone H4 proteins (see also HHF1); core histone required for chromatin assembly and chromosome function; contributes to telomeric silencing; N-terminal domain involved in maintaining genomic integrity                                                         |
| (36) MODULE 41             |       |                                                                                                                                                                                                                                                                                         |
| <b>Genotype regulators</b> |       |                                                                                                                                                                                                                                                                                         |
| M1_184243_187272           |       | YAR019W-A PAU7(0,2) YAR023C UIP3(9,133) YAR028W YAR029W YAR030C PRM9(60,6) MST28(5,7) YAR035C-A YAT1(2,63) SWH1(10,11) YAR044W                                                                                                                                                          |
| <b>Module genes</b>        |       |                                                                                                                                                                                                                                                                                         |
| YAR027W                    | UIP3  | Putative integral membrane protein of unknown function; interacts with Ulp1p at the nuclear periphery; member of DUP240 gene family                                                                                                                                                     |
| YAR028W                    | None  |                                                                                                                                                                                                                                                                                         |
| (37) MODULE 42             |       |                                                                                                                                                                                                                                                                                         |
| <b>Genotype regulators</b> |       |                                                                                                                                                                                                                                                                                         |
| M16_533282_555416          |       | HAT1(2,2) SNF8(0,2) ULA1(2,0) LSP1(0,0) AEP3(2,0) NCR1(0,3) TFC8(1,3) CHL1(2,1) YPL009C RET3(1,2) TAF3(1,2) RRP12(5,1) MRPS16(0,1) YPL014W HST2(1,2) CIT3(0,23) YPR002C-A PDH1(0,0) YPR003C YPR004C                                                                                     |
| <b>Module genes</b>        |       |                                                                                                                                                                                                                                                                                         |
| YPL002C                    | SNF8  | appears to be functionally related to SNF7; involved in glucose derepression                                                                                                                                                                                                            |
| YPR006C                    | ICL2  | 2-methylisocitrate lyase of the mitochondrial matrix, functions in the methylcitrate cycle to catalyze the conversion of 2-methylisocitrate to succinate and pyruvate; ICL2 transcription is repressed by glucose and induced by ethanol                                                |

| (38) MODULE 43               |       |                                                                                                                                                                                                                 |
|------------------------------|-------|-----------------------------------------------------------------------------------------------------------------------------------------------------------------------------------------------------------------|
| <b>Expression regulators</b> |       |                                                                                                                                                                                                                 |
| YDR043C                      | NRG1  | Transcriptional repressor that recruits the Cyc8p-Tup1p complex to promoters; mediates glucose repression and negatively regulates a variety of processes including filamentous growth and alkaline pH response |
| YGR014W                      | MSB2  | Protein that functions as an osmosensor in parallel to the Sho1p-mediated pathway, multicopy suppressor of a temperature-sensitive mutation in CDC24, potential Cdc28p substrate                                |
| <b>Genotype regulators</b>   |       |                                                                                                                                                                                                                 |
| M2_562409_570229             |       | ICS2(1,5) AMN1(3,17) YBR159W CDC28(0,5) CSH1(0,3) TOS1(2,3) YSY6(1,3) DEM1(6,5) ARL1(0,5) UBS1(0,5) TYR1(7,5) POP7(1,4) PEX32(4,4) SSE2(4,7) NPL4(2,1) SEC66(0,1)                                               |
| <b>Module genes</b>          |       |                                                                                                                                                                                                                 |
| YNR067C                      | DSE4  | Daughter cell-specific secreted protein with similarity to glucanases, degrades cell wall from the daughter side causing daughter to separate from mother                                                       |
| YBR132C                      | AGP2  | Plasma membrane carnitine transporter, expression is down-regulated by osmotic stress; also functions as a low-affinity amino acid permease                                                                     |
| YJL078C                      | PRY3  | Protein of unknown function, has similarity to Pry1p and Pry2p and to the plant PR-1 class of pathogen related proteins                                                                                         |
| YOR264W                      | DSE3  | Daughter cell-specific protein, may help establish daughter fate                                                                                                                                                |
| YER124C                      | DSE1  | Daughter cell-specific protein, may participate in pathways regulating cell wall metabolism; deletion affects cell separation after division and sensitivity to drugs targeted against the cell wall            |
| YGR041W                      | BUD9  | Protein involved in bud-site selection; diploid mutants display a unipolar budding pattern instead of the wild-type bipolar pattern, and bud at the distal pole                                                 |
| YGL028C                      | SCW11 | Cell wall protein with similarity to glucanases; may play a role in conjugation during mating based on its regulation by Ste12p                                                                                 |
| YMR285C                      | NGL2  | RNase required for correct 3'-end formation of 5.8S rRNA at site E; has similarity to Ngl1p and Ngl3p and to drosophila Angelgene                                                                               |
| YKL132C                      | RMA1  | probable foyl-polyglutamate synthetase                                                                                                                                                                          |
| YOR263C                      | None  |                                                                                                                                                                                                                 |
| YNL078W                      | NIS1  | None                                                                                                                                                                                                            |
| YBR158W                      | AMN1  | Involved in daughter cell separation and Chromosome STability; Chromosome STability                                                                                                                             |
| YHR143W                      | DSE2  | Daughter cell-specific secreted protein with similarity to glucanases, degrades cell wall from the daughter side causing daughter to separate from mother; expression is repressed by cAMP                      |
| YPR106W                      | ISR1  | Predicted protein kinase, overexpression causes sensitivity to staurosporine, which is a potent inhibitor of protein kinase C                                                                                   |
| YNL066W                      | SUN4  | Protein involved in the aging process; related to glucanases                                                                                                                                                    |
| YNL327W                      | EGT2  | Glycosylphosphatidylinositol (GPI)-anchored cell wall endoglucanase required for proper cell separation after                                                                                                   |

|                              |       |                                                                                                                                                                                                                                             |
|------------------------------|-------|---------------------------------------------------------------------------------------------------------------------------------------------------------------------------------------------------------------------------------------------|
|                              |       | cytokinesis, expression is activated by Swi5p and tightly regulated in a cell cycle-dependent manner                                                                                                                                        |
| (39) MODULE 44               |       |                                                                                                                                                                                                                                             |
| <b>Expression regulators</b> |       |                                                                                                                                                                                                                                             |
| YGL208W                      | SIP2  | Member of a family of proteins, including Sip1p and Gal83p, that interact with Snf1p and Snf4p and are involved in the response to glucose starvation; component of Snf1 protein complex involved in response to glucose starvation         |
| YOR337W                      | TEA1  | Mutants are defective in Ty1 Enhancer-mediated Activation; Ty1 enhancer activator                                                                                                                                                           |
| YOR101W                      | RAS1  | ras proto-oncogene homolog                                                                                                                                                                                                                  |
| YPL230W                      | None  |                                                                                                                                                                                                                                             |
| YKL109W                      | HAP4  | Subunit of the heme-activated, glucose-repressed Hap2p/3p/4p/5p CCAAT-binding complex, a transcriptional activator and global regulator of respiratory gene expression; provides the principal activation function of the complex           |
| YFR009W                      | GCN20 | Positive regulator of the Gcn2p kinase activity, forms a complex with Gcn1p; proposed to stimulate Gcn2p activation by an uncharged tRNA                                                                                                    |
| YIL033C                      | BCY1  | Regulatory subunit of the cyclic AMP-dependent protein kinase (PKA), a component of a signaling pathway that controls a variety of cellular processes, including metabolism, cell cycle, stress response, stationary phase, and sporulation |
| <b>Module genes</b>          |       |                                                                                                                                                                                                                                             |
| YOL092W                      | None  |                                                                                                                                                                                                                                             |
| YMR038C                      | CCS1  | Copper chaperone for superoxide dismutase Sod1p, involved in oxidative stress protection; Met-X-Cys-X2-Cys motif within the N-terminal portion is involved in insertion of copper into Sod1p under conditions of copper deprivation         |
| YDR046C                      | BAP3  | Amino acid permease involved in the uptake of cysteine, leucine, isoleucine and valine                                                                                                                                                      |
| YER086W                      | ILV1  | Threonine deaminase, catalyzes the first step in isoleucine biosynthesis; expression is under general amino acid control; ILV1 locus exhibits highly positioned nucleosomes whose organization is independent of known ILV1 regulation      |
| YGR061C                      | ADE6  | Formylglycinamide-ribonucleotide (FGAM)-synthetase, catalyzes a step in the 'de novo' purine nucleotide biosynthetic pathway                                                                                                                |
| YHR020W                      | None  |                                                                                                                                                                                                                                             |
| YDR037W                      | KRS1  | Lysyl-tRNA synthetase; also identified as a negative regulator of general control of amino acid biosynthesis                                                                                                                                |
| YNR046W                      | None  |                                                                                                                                                                                                                                             |
| YPR033C                      | HTS1  | Cytoplasmic and mitochondrial histidine tRNA synthetase; encoded by a single nuclear gene that specifies two messages; efficient mitochondrial localization requires both a presequence and an amino-terminal sequence                      |
| YOL046C                      | None  |                                                                                                                                                                                                                                             |
| YGR124W                      | ASN2  | Asparagine synthetase, isozyme of Asn1p; catalyzes the synthesis of L-asparagine from L-aspartate in the asparagine biosynthetic pathway                                                                                                    |

|                              |        |                                                                                                                                                                                                                               |
|------------------------------|--------|-------------------------------------------------------------------------------------------------------------------------------------------------------------------------------------------------------------------------------|
| YHR025W                      | THR1   | homoserine kinase                                                                                                                                                                                                             |
| YGL234W                      | ADE5,7 | Bifunctional enzyme of the 'de novo' purine nucleotide biosynthetic pathway, contains aminoimidazole ribotide synthetase and glycinamide ribotide synthetase activities                                                       |
| YHR047C                      | AAP1'  | Arginine/alanine aminopeptidase, overproduction stimulates glycogen accumulation                                                                                                                                              |
| YHR063C                      | PAN5   | 2-dehydropantoate 2-reductase, part of the pantothenic acid pathway, structurally homologous to E. coli panE                                                                                                                  |
| YCR053W                      | THR4   | threonine synthase                                                                                                                                                                                                            |
| YLR331C                      | JIP3   | Dubious open reading frame, unlikely to encode a protein; not conserved in closely related Saccharomyces species; 98% of ORF overlaps the verified gene MID2                                                                  |
| YNL095C                      | None   |                                                                                                                                                                                                                               |
| YHR014W                      | SPO13  | Meiosis-specific protein of unknown function, involved in maintaining sister chromatid cohesion during meiosis I as well as promoting proper attachment of kinetochores to the spindle during meiosis I and meiosis II        |
| YLR359W                      | ADE13  | Adenylosuccinate lyase, catalyzes two steps in the 'de novo' purine nucleotide biosynthetic pathway                                                                                                                           |
| YGL071W                      | RCS1   | Transcription factor that binds the consensus site PyPuCACCCPu, involved in iron homeostasis and cell size regulation; activates the expression of target genes in response to low-iron conditions                            |
| YGL039W                      | None   |                                                                                                                                                                                                                               |
| YDR341C                      | None   |                                                                                                                                                                                                                               |
| YOR323C                      | PRO2   | Gamma-glutamyl phosphate reductase, catalyzes the second step in proline biosynthesis                                                                                                                                         |
| YOR262W                      | None   |                                                                                                                                                                                                                               |
| YPL160W                      | CDC60  | Cytosolic leucyl tRNA synthetase, ligates leucine to the appropriate tRNA                                                                                                                                                     |
| YKR099W                      | BAS1   | Myb-related transcription factor involved in regulating basal and induced expression of genes of the purine and histidine biosynthesis pathways                                                                               |
| YKL072W                      | STB6   | binds Sin3p in two-hybrid assay; involved in transcription                                                                                                                                                                    |
| (40) MODULE 46               |        |                                                                                                                                                                                                                               |
| <b>Expression regulators</b> |        |                                                                                                                                                                                                                               |
| YGR070W                      | ROM1   | GDP/GTP exchange protein (GEP) for Rho1p; mutations are synthetically lethal with mutations in rom2, which also encodes a GEP                                                                                                 |
| YGL248W                      | PDE1   | Low-affinity cyclic AMP phosphodiesterase, controls glucose and intracellular acidification-induced cAMP signaling, target of the cAMP-protein kinase A (PKA) pathway; glucose induces transcription and inhibits translation |
| YCR091W                      | KIN82  | Putative serine/threonine protein kinase, most similar to cyclic nucleotide-dependent protein kinase subfamily and the protein kinase C subfamily                                                                             |
| YOL113W                      | SKM1   | Serine/threonine protein kinase with similarity to Ste20p and Cla4p                                                                                                                                                           |
| YGR200C                      | ELP2   | Elongator protein, part of the six-subunit RNA polymerase II Elongator histone acetyltransferase complex; target of                                                                                                           |

|                     |        |                                                                                                                                                                                                                                                 |
|---------------------|--------|-------------------------------------------------------------------------------------------------------------------------------------------------------------------------------------------------------------------------------------------------|
|                     |        | Kluyveromyces lactis zymocin                                                                                                                                                                                                                    |
| YJL098W             | SAP185 | Protein that forms a complex with the Sit4p protein phosphatase and is required for its function; member of a family of similar proteins including Sap4p, Sap155p, and Sap190p                                                                  |
| YIL101C             | XBP1   | Transcriptional repressor that binds to promoter sequences of the cyclin genes, CYS3, and SMF2; expression is induced by stress or starvation during mitosis, and late in meiosis; member of the Swi4p/Mbp1p family; potential Cdc28p substrate |
| <b>Module genes</b> |        |                                                                                                                                                                                                                                                 |
| YDR058C             | TGL2   | Triglyceride Lipase                                                                                                                                                                                                                             |
| YOR228C             | None   |                                                                                                                                                                                                                                                 |
| YEL060C             | PRB1   | Vacuolar proteinase B (yscB), a serine protease of the subtilisin family; involved in protein degradation in the vacuole and required for full protein degradation during sporulation                                                           |
| YKR067W             | GPT2   | Glycerol-3-phosphate acyltransferase located in both lipid particles and the ER; involved in the stepwise acylation of glycerol-3-phosphate and dihydroxyacetone, which are intermediate steps in lipid biosynthesis                            |
| YBR269C             | FMP21  | The authentic, non-tagged protein was localized to the mitochondria                                                                                                                                                                             |
| YLR164W             | None   |                                                                                                                                                                                                                                                 |
| YMR020W             | FMS1   | Polyamine oxidase, converts spermine to spermidine, which is required for the essential hypusination modification of translation factor eIF-5A; also involved in pantothenic acid biosynthesis                                                  |
| YCR068W             | ATG15  | Lipase, required for intravacuolar lysis of autophagic bodies; located in the endoplasmic reticulum membrane and targeted to intravacuolar vesicles during autophagy via the multivesicular body (MVB) pathway                                  |
| YBL078C             | ATG8   | Forms a protein complex with Aut2p to mediate attachment of autophagosomes to microtubules. Defective in maturation of the vacuolar protein, aminopeptidase I; Aut7p has homology to LC3, a microtubule-associated protein from rat.            |
| YMR279C             | None   |                                                                                                                                                                                                                                                 |
| YER039C             | HVG1   | Protein of unknown function, has homology to Vrg4p                                                                                                                                                                                              |
| YOR152C             | None   |                                                                                                                                                                                                                                                 |
| YML118W             | NGL3   | DNase/RNase (putative); CCR4 C-terminal homolog; displays homology to drosophila Angel gene; homolog to ngl1 and ngl2                                                                                                                           |
| YNL223W             | ATG4   | Anchor protein involved in autophagy and required for sporulation; interacts with Tub1p and Tub2p and forms a complex with Aut7p; mediates attachment of autophagosomes to microtubules                                                         |
| YJL057C             | None   |                                                                                                                                                                                                                                                 |
| YLR080W             | EMP46  | Integral membrane component of endoplasmic reticulum-derived COPII-coated vesicles, which function in ER to Golgi transport                                                                                                                     |
| YHR138C             | None   |                                                                                                                                                                                                                                                 |
| YDR018C             | None   |                                                                                                                                                                                                                                                 |
| YML042W             | CAT2   | Carnitine O-acetyltransferase, peroxisomal and mitochondrial                                                                                                                                                                                    |

|         |       |                                                                                                                                                                                                                                                               |
|---------|-------|---------------------------------------------------------------------------------------------------------------------------------------------------------------------------------------------------------------------------------------------------------------|
| YGR045C | None  |                                                                                                                                                                                                                                                               |
| YJL141C | YAK1  | Serine-threonine protein kinase                                                                                                                                                                                                                               |
| YPL247C | None  |                                                                                                                                                                                                                                                               |
| YDR358W | GGA1  | Golgi-localized protein with homology to gamma-adaptin, interacts with and regulates Arf1p and Arf2p in a GTP-dependent manner in order to facilitate traffic through the late Golgi                                                                          |
| YDL072C | YET3  | Endoplasmic reticulum transmembrane protein, homolog of human BAP31 protein                                                                                                                                                                                   |
| YBR241C | None  |                                                                                                                                                                                                                                                               |
| YDR059C | UBC5  | Ubiquitin-conjugating enzyme that mediates selective degradation of short-lived and abnormal proteins, central component of the cellular stress response; expression is heat inducible                                                                        |
| YBL049W | MOH1  | Protein of unknown function, has homology to kinase Snf7p                                                                                                                                                                                                     |
| YIL077C | None  |                                                                                                                                                                                                                                                               |
| YJL132W | None  |                                                                                                                                                                                                                                                               |
| YAL028W | FRT2  | Tail-anchored endoplasmic reticulum membrane protein, interacts with homolog Frt1p but is not a substrate of calcineurin (unlike Frt1p), promotes growth in conditions of high Na <sup>+</sup> , alkaline pH, or cell wall stress; potential Cdc28p substrate |
| YPL166W | None  |                                                                                                                                                                                                                                                               |
| YMR262W | None  |                                                                                                                                                                                                                                                               |
| YOR137C | SIA1  | Suppressor of eIF5A; High-copy suppressor of temperature-sensitive tif51A-1                                                                                                                                                                                   |
| YER079W | None  |                                                                                                                                                                                                                                                               |
| YDL169C | UGX2  | Protein of unknown function                                                                                                                                                                                                                                   |
| YGR066C | None  |                                                                                                                                                                                                                                                               |
| YFL042C | None  |                                                                                                                                                                                                                                                               |
| YKL121W | None  |                                                                                                                                                                                                                                                               |
| YGR281W | YOR1  | Plasma membrane transporter of the ATP-binding cassette (ABC) family, mediates export of many different organic anions including oligomycin                                                                                                                   |
| YDR043C | NRG1  | Transcriptional repressor that recruits the Cyc8p-Tup1p complex to promoters; mediates glucose repression and negatively regulates a variety of processes including filamentous growth and alkaline pH response                                               |
| YIR018W | YAP5  | bZIP transcription factor                                                                                                                                                                                                                                     |
| YNL116W | DMA2  | Protein involved in regulating spindle position and orientation, functionally redundant with Dma1p; homolog of <i>S. pombe</i> Dma1 and <i>H. sapiens</i> Chfr                                                                                                |
| YJL070C | None  |                                                                                                                                                                                                                                                               |
| YAL054C | ACS1  | one of 2 acetyl-coA synthetases in yeast; inducible acetyl-coenzyme A synthetase                                                                                                                                                                              |
| YPL222W | FMP40 | The authentic, non-tagged protein was localized to the mitochondria.                                                                                                                                                                                          |
| YOR121C | None  |                                                                                                                                                                                                                                                               |
| YIL017C | VID28 | Vacuole import and degradation                                                                                                                                                                                                                                |



|           |        |                                                                                                                                                                                                                                 |
|-----------|--------|---------------------------------------------------------------------------------------------------------------------------------------------------------------------------------------------------------------------------------|
| YFR017C   | None   |                                                                                                                                                                                                                                 |
| YBR001C   | NTH2   | Neutral trehalase, degrades trehalose; required for thermotolerance and may mediate resistance to other cellular stresses                                                                                                       |
| YAL034C   | FUN19  | Protein of unknown function                                                                                                                                                                                                     |
| YPL018W   | CTF19  | Outer kinetochore protein, required for accurate mitotic chromosome segregation; forms a complex with Mcm21p and Okp1p that binds to centromeres via the CBF3 complex                                                           |
| YKL188C   | PXA2   | Homolog of the human adrenoleukodystrophy transporter; forms a heterodimer with Pxa1p of two half ATP-binding cassette transporters in the peroxisome membrane; peroxisomal ABC transporter 2                                   |
| YMR291W   | None   |                                                                                                                                                                                                                                 |
| YMR195W   | ICY1   | Protein that interacts with the cytoskeleton and is involved in chromatin organization and nuclear transport, interacts genetically with TCP1 and ICY2, required for viability in rich media of cells lacking mitochondrial DNA |
| YER035W   | EDC2   | RNA-binding protein, activates mRNA decapping directly by binding to the mRNA substrate and enhancing the activity of the decapping proteins Dcp1p and Dcp2p                                                                    |
| YHL027W   | RIM101 | Transcriptional activator required for entry into meiosis, has similarity to the Aspergillus Phenotype-response regulator PacC and the Yarrowia proteinase YIRim1010p; Meiotic regulatory protein; Cys-His zinc fingers         |
| YBR046C   | ZTA1   | Zeta-crystallin homolog, found in the cytoplasm and nucleus; has similarity to E. coli quinone oxidoreductase and to human zeta-crystallin, which has quinone oxidoreductase activity                                           |
| YJL079C   | PRY1   | Protein of unknown function, has similarity to Pry2p and Pry3p and to the plant PR-1 class of pathogen related proteins                                                                                                         |
| YKL103C   | LAP4   | Vacuolar aminopeptidase, often used as a marker protein in studies of autophagy and cytosol to vacuole targeting (CTV) pathway                                                                                                  |
| YPL006W   | NCR1   | A transmembrane glycoprotein that is homologous to human Niemann-Pick Type C (NPC) gene; involved in sphingolipid metabolism; predicted transmembrane protein                                                                   |
| YLL040C   | VPS13  | homologous to human COH1; component of peripheral vacuolar membrane protein complex                                                                                                                                             |
| YOR040W   | GLO4   | Mitochondrial glyoxalase II, catalyzes the hydrolysis of S-D-lactoylglutathione into glutathione and D-lactate                                                                                                                  |
| YOR120W   | GCY1   | Putative NADP(+) coupled glycerol dehydrogenase, proposed to be involved in an alternative pathway for glycerol catabolism                                                                                                      |
| YPR155C   | NCA2   | Regulates proper expression of subunits 6 (Atp6p) and 8 (Atp8p) of the Fo-F1 ATP synthase; Regulates expression of mitochondrial ATP synthase                                                                                   |
| YJL163C   | None   |                                                                                                                                                                                                                                 |
| YGR067C   | None   |                                                                                                                                                                                                                                 |
| YMR251W   | None   |                                                                                                                                                                                                                                 |
| YDR525W-A | SNA2   | Protein of unknown function, has similarity to Pmp3p, which is involved in cation transport; green fluorescent protein (GFP)-fusion protein localizes to the cytoplasm in a punctate pattern                                    |

|         |       |                                                                                                                                                                                                                                              |
|---------|-------|----------------------------------------------------------------------------------------------------------------------------------------------------------------------------------------------------------------------------------------------|
| YPL177C | CUP9  | Homeodomain-containing transcriptional repressor of PTR2, which encodes a major peptide transporter; imported peptides activate ubiquitin-dependent proteolysis, resulting in degradation of Cup9p and de-repression of PTR2 transcription   |
| YLR375W | STP3  | Protein involved in pre-tRNA splicing and in uptake of branched-chain amino acids                                                                                                                                                            |
| YDR055W | PST1  | Cell wall protein that contains a putative GPI-attachment site; secreted by regenerating protoplasts; up-regulated by activation of the cell integrity pathway, as mediated by Rlm1p; upregulated by cell wall damage via disruption of FKS1 |
| YJR008W | None  |                                                                                                                                                                                                                                              |
| YIL042C | None  |                                                                                                                                                                                                                                              |
| YOR347C | PYK2  | Pyruvate kinase, glucose-repressed isoform; pyruvate kinase                                                                                                                                                                                  |
| YMR261C | TPS3  | 115 kD regulatory subunit of trehalose-6-phosphate synthase/phosphatase complex                                                                                                                                                              |
| YMR253C | None  |                                                                                                                                                                                                                                              |
| YPL165C | SET6  | None                                                                                                                                                                                                                                         |
| YHR171W | ATG7  | autophagy; similar to ubiquitin-activating enzymes, involved in autophagy                                                                                                                                                                    |
| YHL021C | FMP12 | The authentic, non-tagged protein was localized to the mitochondria                                                                                                                                                                          |
| YDL085W | NDE2  | None                                                                                                                                                                                                                                         |
| YDL199C | None  |                                                                                                                                                                                                                                              |
| YLR312C | None  |                                                                                                                                                                                                                                              |
| YPR003C | None  |                                                                                                                                                                                                                                              |
| YOR186W | None  |                                                                                                                                                                                                                                              |
| YNL242W | ATG2  | Defective in autophagy; required for sporulation; Required for sporulation.                                                                                                                                                                  |
| YKR058W | GLG1  | Self-glucosylating initiator of glycogen synthesis, also glucosylates n-dodecyl-beta-D-maltoside; similar to mammalian glycogenin                                                                                                            |
| YJL210W | PEX2  | C3HC4 zinc-binding integral peroxisomal membrane protein; Pex2p, Pex10p, and Pex12p together make up the RING finger complex of the peroxisomal import machinery                                                                             |
| YMR053C | STB2  | Protein that binds Sin3p in a two-hybrid assay and is part of a large protein complex with Sin3p and Stb1p                                                                                                                                   |
| YOR215C | None  |                                                                                                                                                                                                                                              |
| YFR047C | BNA6  | Quinolate phosphoribosyl transferase, required for biosynthesis of nicotinic acid from tryptophan via kynurenine pathway                                                                                                                     |
| YBR214W | SDS24 | Nuclear protein with similarity to <i>S. pombe</i> Sds23, suppresses dis2 mutations                                                                                                                                                          |
| YBR280C | None  |                                                                                                                                                                                                                                              |
| YPL017C | None  |                                                                                                                                                                                                                                              |
| YKL129C | MYO3  | One of two class-I myosins; localizes to actin cortical patches; deletion of MYO3 has little effect on growth, but myo3 myo5 double deletion causes severe defects in growth and actin cytoskeleton organization; myosin I                   |
| YKL065C | YET1  | Endoplasmic reticulum transmembrane protein, homolog of                                                                                                                                                                                      |

|                              |       |                                                                                                                                                                                                                                              |
|------------------------------|-------|----------------------------------------------------------------------------------------------------------------------------------------------------------------------------------------------------------------------------------------------|
|                              |       | human BAP31 protein                                                                                                                                                                                                                          |
| YGL121C                      | GPG1  | Proposed gamma subunit of the heterotrimeric G protein that interacts with the receptor Grp1p; involved in regulation of pseudohyphal growth; requires Gpb1p or Gpb2p to interact with Gpa2p                                                 |
| YMR304W                      | UBP15 | Ubiquitin-specific protease that may play a role in ubiquitin precursor processing                                                                                                                                                           |
| YDR530C                      | APA2  | Diadenosine 5',5"-P1,P4-tetraphosphate phosphorylase II (AP4A phosphorylase), involved in catabolism of bis(5'-nucleosidyl) tetraphosphates; has similarity to Apa1p                                                                         |
| YNL011C                      | None  |                                                                                                                                                                                                                                              |
| YFR043C                      | None  |                                                                                                                                                                                                                                              |
| YJL116C                      | NCA3  | With NCA2, regulates proper expression of subunits 6 (Atp6p) and 8 (Atp8p) of the Fo-F1 ATP synthase; involved in regulating expression of F0F1 ATPase subunits                                                                              |
| YLR356W                      | None  |                                                                                                                                                                                                                                              |
| YDR204W                      | COQ4  | Protein with a role in ubiquinone (Coenzyme Q) biosynthesis, possibly functioning in stabilization of Coq7p; located on the matrix face of the mitochondrial inner membrane                                                                  |
| YCL038C                      | ATG22 | Autophagy gene essential for breakdown of autophagic vesicles in the vacuole                                                                                                                                                                 |
| YER037W                      | PHM8  | Protein of unknown function, expression is induced by low phosphate levels and by inactivation of Pho85p                                                                                                                                     |
| YOR134W                      | BAG7  | Rho GTPase activating protein (RhoGAP), stimulates the intrinsic GTPase activity of Rho1p, which plays a role in actin cytoskeleton organization and control of cell wall synthesis; structurally and functionally related to Sac7p          |
| YBR006W                      | UGA2  | involved in utilization of GABA as a nitrogen source; succinate semialdehyde dehydrogenase                                                                                                                                                   |
| YPR127W                      | None  |                                                                                                                                                                                                                                              |
| YMR322C                      | SNO4  | Possible chaperone and cysteine protease with similarity to E. coli Hsp31 and S. cerevisiae Hsp31p, Hsp32p, and Hsp33p; member of the DJ-1/ThiJ/PfpI superfamily; may have a role in pyridoxine metabolism                                   |
| YNR002C                      | FUN34 | Putative transmembrane protein, involved in ammonia production; member of the TC 9.B.33 YaaH family; homolog of Ady2p and Y. lipolytica Gpr1p                                                                                                |
| (41) MODULE 48               |       |                                                                                                                                                                                                                                              |
| <b>Expression regulators</b> |       |                                                                                                                                                                                                                                              |
| YIR017C                      | MET28 | Transcriptional activator in the Cbf1p-Met4p-Met28p complex, participates in the regulation of sulfur metabolism                                                                                                                             |
| YOR178C                      | GAC1  | Regulatory subunit for Glc7p (protein phosphatase I) for glycogen synthesis; regulatory role also predicted for glucose repression and ion homeostasis; potential Cdc28p substrate                                                           |
| YJL164C                      | TPK1  | putative catalytic subunit of cAMP-dependent protein kinase                                                                                                                                                                                  |
| YJL157C                      | FAR1  | Cyclin-dependent kinase inhibitor that mediates cell cycle arrest in response to pheromone; also forms a complex with Cdc24p, Ste4p, and Ste18p that may specify the direction of polarized growth during mating; potential Cdc28p substrate |
| YJL103C                      | None  |                                                                                                                                                                                                                                              |

|                     |       |                                                                                                                                                                                                                                                  |
|---------------------|-------|--------------------------------------------------------------------------------------------------------------------------------------------------------------------------------------------------------------------------------------------------|
| YER054C             | GIP2  | Putative regulatory subunit of the protein phosphatase Glc7p, proposed to be involved in glycogen metabolism; contains a conserved motif (GVNK motif) that is also found in Gac1p, Pig1p, and Pig2p                                              |
| YER054C             | GIP2  | Putative regulatory subunit of the protein phosphatase Glc7p, proposed to be involved in glycogen metabolism; contains a conserved motif (GVNK motif) that is also found in Gac1p, Pig1p, and Pig2p                                              |
| <b>Module genes</b> |       |                                                                                                                                                                                                                                                  |
| YDR402C             | DIT2  | Sporulation-specific enzyme required for spore wall maturation, involved in the production of a soluble LL-dityrosine-containing precursor of the spore wall, homologous to cytochrome P-450s                                                    |
| YPL265W             | DIP5  | Dicarboxylic amino acid permease, mediates high-affinity and high-capacity transport of L-glutamate and L-aspartate; also a transporter for Gln, Asn, Ser, Ala, and Gly                                                                          |
| YER091C             | MET6  | Cobalamin-independent methionine synthase, involved in amino acid biosynthesis; also called N5-methyltetrahydrofolate homocysteine methyltransferase or 5-methyltetrahydropteroyltriglutamate homocysteine methyltransferase                     |
| YJR146W             | None  |                                                                                                                                                                                                                                                  |
| YKL001C             | MET14 | Adenylylsulfate kinase, required for sulfate assimilation and involved in methionine metabolism                                                                                                                                                  |
| YGL153W             | PEX14 | Peroxisomal peripheral membrane protein (peroxin) involved in import of peroxisomal matrix proteins; component of peroxisomal import machinery                                                                                                   |
| YDL114W             | None  |                                                                                                                                                                                                                                                  |
| YOL158C             | ENB1  | Endosomal ferric enterobactin transporter, expressed under conditions of iron deprivation; member of the major facilitator superfamily; expression is regulated by Rcs1p and affected by chloroquine treatment                                   |
| YHR046C             | INM1  | Inositol monophosphatase, involved in biosynthesis of inositol and in phosphoinositide second messenger signalling; INM1 expression increases in the presence of inositol and decreases upon exposure to antibipolar drugs lithium and valproate |
| YPR048W             | TAH18 | Protein with a potential role in DNA replication; displays synthetic lethal genetic interaction with the pol3-13 allele of POL3, which encodes DNA polymerase delta                                                                              |
| YNR034W             | SOL1  | Multicopy Suppressor Of los1; shows similarity to glucose-6-phosphate dehydrogenase non-catalytic domains; homologous to Sol2p and Sol3p                                                                                                         |
| YJR010W             | MET3  | ATP sulfurylase, catalyzes the primary step of intracellular sulfate activation, essential for assimilatory reduction of sulfate to sulfide, involved in methionine metabolism                                                                   |
| YLR302C             | None  |                                                                                                                                                                                                                                                  |
| YDR384C             | ATO3  | Plasma membrane protein, regulation pattern suggests a possible role in export of ammonia from the cell; member of the TC 9.B.33 YaaH family of putative transporters                                                                            |
| YIL168W             | None  |                                                                                                                                                                                                                                                  |
| YEL072W             | RMD6  | Protein required for sporulation                                                                                                                                                                                                                 |

|                              |       |                                                                                                                                                                                                                                      |
|------------------------------|-------|--------------------------------------------------------------------------------------------------------------------------------------------------------------------------------------------------------------------------------------|
| YLR355C                      | ILV5  | Acetohydroxyacid reductoisomerase, mitochondrial protein involved in branched-chain amino acid biosynthesis, also required for maintenance of wild-type mitochondrial DNA                                                            |
| YMR058W                      | FET3  | Ferro-O <sub>2</sub> -oxidoreductase required for high-affinity iron uptake and involved in mediating resistance to copper ion toxicity, belongs to class of integral membrane multicopper oxidases                                  |
| YNL318C                      | HXT14 | Protein of unknown function with similarity to hexose transporter family members, expression is induced by low levels of glucose and repressed by high levels of glucose                                                             |
| YIL105C                      | SLM1  | Protein of unknown function; mutation is synthetically lethal with an mss4 mutation                                                                                                                                                  |
| YEL008W                      | None  |                                                                                                                                                                                                                                      |
| YPL130W                      | SPO19 | Meiosis-specific protein of unknown function, involved in completion of nuclear divisions; identified as a weak high-copy suppressor of the spo1-1 ts mutation; putative GPI-dependent cell-wall protein                             |
| YPL080C                      | None  |                                                                                                                                                                                                                                      |
| YEL065W                      | SIT1  | Ferrioxamine B transporter, member of the ARN family of transporters that specifically recognize siderophore-iron chelates; transcription is induced during iron deprivation and diauxic shift; potentially phosphorylated by Cdc28p |
| YJL127C                      | SPT10 | Putative histone acetylase, required for transcriptional regulation at core promoters, functions at or near the TATA box                                                                                                             |
| YIL053W                      | RHR2  | Constitutively expressed isoform of DL-glycerol-3-phosphatase; involved in glycerol biosynthesis, induced in response to both anaerobic and, along with the Hor2p/Gpp2p isoform, osmotic stress                                      |
| YIL163C                      | None  |                                                                                                                                                                                                                                      |
| YNL276C                      | None  |                                                                                                                                                                                                                                      |
| YOL059W                      | GPD2  | Involved in glycerol production via conversion of glycerol-3-phosphate and NAD <sup>+</sup> to glycerol phosphate and NADH; Glycerol-3-phosphate dehydrogenase (NAD <sup>+</sup> )                                                   |
| YLR307W                      | CDA1  | Required for proper formation of the ascospore wall; Chitin Deacetylase                                                                                                                                                              |
| YDL059C                      | RAD59 | Protein involved in the repair of double-strand breaks in DNA during vegetative growth via recombination and single-strand annealing; anneals complementary single-stranded DNA; homologous to Rad52p                                |
| YJL212C                      | OPT1  | Plasma membrane transporter that transports tetra- and pentapeptides and glutathione; member of the OPT family                                                                                                                       |
| YPL058C                      | PDR12 | Plasma membrane weak-acid-inducible ATP-binding cassette (ABC) transporter, required for weak organic acid resistance, strongly induced by sorbate and benzoate, regulated by War1p, mutants exhibit sorbate hypersensitivity        |
| (42) MODULE 49               |       |                                                                                                                                                                                                                                      |
| <b>Expression regulators</b> |       |                                                                                                                                                                                                                                      |
| YOL113W                      | SKM1  | Serine/threonine protein kinase with similarity to Ste20p and Cla4p                                                                                                                                                                  |
| YIL147C                      | SLN1  | Histidine kinase osmosensor that regulates a MAP kinase cascade; transmembrane protein with an intracellular kinase                                                                                                                  |

|                              |      |                                                                                                                                                                                                   |
|------------------------------|------|---------------------------------------------------------------------------------------------------------------------------------------------------------------------------------------------------|
|                              |      | domain that signals to Ypd1p and Ssk1p, thereby forming a phosphorelay system similar to bacterial two-component regulators                                                                       |
| <b>Genotype regulators</b>   |      |                                                                                                                                                                                                   |
| M13_905780_922268            |      | YMR310C GLC8(0,3) ELP6(1,3) TGL3(1,5) PRE5(0,5) YMR315W YMR315W-A YMR316C-A YMR316C-B DIA1(1,4) YMR317W ADH6(0,8) FET4(1,8) YMR320W YMR321C SNO4(1,20) ERR3 YMR324C YMR325W YMR326C               |
| <b>Module genes</b>          |      |                                                                                                                                                                                                   |
| YPL273W                      | SAM4 | S-adenosylmethionine-homocysteine methyltransferase, functions along with Mht1p in the conversion of S-adenosylmethionine (AdoMet) to methionine to control the methionine/AdoMet ratio           |
| YPL279C                      | None |                                                                                                                                                                                                   |
| YPL274W                      | SAM3 | High-affinity S-adenosylmethionine permease, required for utilization of S-adenosylmethionine as a sulfur source; has similarity to S-methylmethionine permease Mmp1p                             |
| YOR389W                      | None |                                                                                                                                                                                                   |
| YPL277C                      | None |                                                                                                                                                                                                   |
| YOR390W                      | None |                                                                                                                                                                                                   |
| YMR321C                      | None |                                                                                                                                                                                                   |
| YPL278C                      | None |                                                                                                                                                                                                   |
| (43) MODULE 50               |      |                                                                                                                                                                                                   |
| <b>Expression regulators</b> |      |                                                                                                                                                                                                   |
| YBR158W                      | AMN1 | Involved in daughter cell separation and Chromosome STability; Chromosome STability                                                                                                               |
| YOR047C                      | STD1 | Protein that interacts with the Snf1p protein kinase and Spt15p in two-hybrid and in in vitro binding studies                                                                                     |
| YGR108W                      | CLB1 | Involved in mitotic induction; G(sub)2-specific B-type cyclin                                                                                                                                     |
| YBL066C                      | SEF1 | Suppressor of Essential Function; putative transcription factor                                                                                                                                   |
| YPR013C                      | None |                                                                                                                                                                                                   |
| <b>Module genes</b>          |      |                                                                                                                                                                                                   |
| YAL020C                      | ATS1 | Protein with a potential role in regulatory interactions between microtubules and the cell cycle, as suggested by genetic and physical interactions with Nap1p and genetic interactions with TUB1 |
| YGR203W                      | None |                                                                                                                                                                                                   |
| YLR414C                      | None |                                                                                                                                                                                                   |
| YCR073W-A                    | SOL2 | multicopy suppressor of los1-1; shows similarity to glucose-6-phosphate dehydrogenase non-catalytic domains; homologous to Sol1p and Sol3p                                                        |
| YNL241C                      | ZWF1 | Glucose-6-phosphate dehydrogenase                                                                                                                                                                 |
| YPL067C                      | None |                                                                                                                                                                                                   |
| YBR148W                      | YSW1 | Protein expressed specifically in spores                                                                                                                                                          |
| YLR042C                      | None |                                                                                                                                                                                                   |
| YLR099C                      | ICT1 | Protein of unknown function, null mutation leads to an increase in sensitivity to Calcofluor white; expression of the gene is                                                                     |

|                              |        |                                                                                                                                                                                                                                                  |
|------------------------------|--------|--------------------------------------------------------------------------------------------------------------------------------------------------------------------------------------------------------------------------------------------------|
|                              |        | induced in the presence of isooctane                                                                                                                                                                                                             |
| YOR084W                      | None   |                                                                                                                                                                                                                                                  |
| YNL300W                      | None   |                                                                                                                                                                                                                                                  |
| YNL322C                      | KRE1   | Cell wall glycoprotein involved in beta-glucan assembly; serves as a K1 killer toxin membrane receptor                                                                                                                                           |
| YCL044C                      | None   |                                                                                                                                                                                                                                                  |
| YBR150C                      | TBS1   | Probable Zn-finger protein                                                                                                                                                                                                                       |
| YIL153W                      | RRD1   | Resistant to Rapamycin Deletion                                                                                                                                                                                                                  |
| YOL110W                      | SHR5   | Subunit of a palmitoyltransferase, composed of Shr5p and Erf2p, that adds a palmitoyl lipid moiety to Ras2p through a thioester linkage; palmitoylation is required for Ras2p localization to the plasma membrane                                |
| YER004W                      | FMP52  | The authentic, non-tagged protein was localized to the mitochondria                                                                                                                                                                              |
| YDR156W                      | RPA14  | RNA polymerase I subunit A14                                                                                                                                                                                                                     |
| YGR014W                      | MSB2   | Protein that functions as an osmosensor in parallel to the Sho1p-mediated pathway, multicopy suppressor of a temperature-sensitive mutation in CDC24, potential Cdc28p substrate                                                                 |
| YLR337C                      | VRP1   | Involved in cytoskeletal organization and cellular growth; Proline-rich protein verprolin                                                                                                                                                        |
| YER018C                      | SPC25  | Spindle pole body (SPB) component, localizes to the nuclear side of spindle pole; interacts with Nuf2p, Ndc80p, and Spc24p at the kinetochore; has a putative role in spindle checkpoint control and centromere clustering at spindle pole       |
| YFR051C                      | RET2   | Delta subunit of the coatomer complex (COPI), which coats Golgi-derived transport vesicles; involved in retrograde transport between Golgi and ER                                                                                                |
| YFL031W                      | HAC1   | bZIP transcription factor (ATF/CREB1 homolog) that regulates the unfolded-protein response, via UPRE binding, and membrane biogenesis; ER stress-induced splicing pathway utilizing Ire1p, Trl1p and Ada5p facilitates efficient Hac1p synthesis |
| (44) MODULE 51               |        |                                                                                                                                                                                                                                                  |
| <b>Expression regulators</b> |        |                                                                                                                                                                                                                                                  |
| YJL098W                      | SAP185 | Protein that forms a complex with the Sit4p protein phosphatase and is required for its function; member of a family of similar proteins including Sap4p, Sap155p, and Sap190p                                                                   |
| YJL098W                      | SAP185 | Protein that forms a complex with the Sit4p protein phosphatase and is required for its function; member of a family of similar proteins including Sap4p, Sap155p, and Sap190p                                                                   |
| YJL098W                      | SAP185 | Protein that forms a complex with the Sit4p protein phosphatase and is required for its function; member of a family of similar proteins including Sap4p, Sap155p, and Sap190p                                                                   |
| YHR030C                      | SLT2   | Suppressor of <i>lyt2</i> ; serine/threonine MAP kinase                                                                                                                                                                                          |
| YJL164C                      | TPK1   | putative catalytic subunit of cAMP-dependent protein kinase                                                                                                                                                                                      |
| YCR091W                      | KIN82  | Putative serine/threonine protein kinase, most similar to cyclic nucleotide-dependent protein kinase subfamily and the protein kinase C subfamily                                                                                                |
| YJL164C                      | TPK1   | putative catalytic subunit of cAMP-dependent protein kinase                                                                                                                                                                                      |

| <b>Module genes</b> |       |                                                                                                                                                                                                                                               |
|---------------------|-------|-----------------------------------------------------------------------------------------------------------------------------------------------------------------------------------------------------------------------------------------------|
| YMR185W             | None  |                                                                                                                                                                                                                                               |
| YOR340C             | RPA43 | RNA polymerase I subunit A43                                                                                                                                                                                                                  |
| YOR195W             | SLK19 | Kinetochores-associated protein required for normal segregation of chromosomes in meiosis and mitosis; component of the FEAR regulatory network, which promotes Cdc14p release from the nucleolus during anaphase; potential Cdc28p substrate |
| YNL075W             | IMP4  | Component of the SSU processome, which is required for pre-18S rRNA processing; interacts with Mpp10p; member of a superfamily of proteins that contain a sigma(70)-like motif and associate with RNAs                                        |
| YGR245C             | SDA1  | Severe Depolymerization of Actin                                                                                                                                                                                                              |
| YKL021C             | MAK11 | Protein essential for cell growth and replication of M dsRNA virus; contains four beta-transducin repeats                                                                                                                                     |
| YBR155W             | CNS1  | cyclophilin seven suppressor; component of Hsp90p chaperone machinery                                                                                                                                                                         |
| YAL019W             | FUN30 | Protein whose overexpression affects chromosome stability, potential Cdc28p substrate; homolog of Snf2p                                                                                                                                       |
| YMR310C             | None  |                                                                                                                                                                                                                                               |
| YPL012W             | RRP12 | Protein required for normal pre-rRNA Processing; member of a group of seven genes whose expression is repressed during growth on glucose before and during the diauxic shift                                                                  |
| YLR068W             | FYV7  | Protein of unknown function, required for survival upon exposure to K1 killer toxin; involved in processing the 35S rRNA primary transcript to generate the 20S and 27SA2 pre-rRNA transcripts                                                |
| YHR052W             | CIC1  | Core interacting component 1; ribosome biogenesis protein                                                                                                                                                                                     |
| YMR093W             | UTP15 | Nucleolar protein, component of the small subunit (SSU) processome containing the U3 snoRNA that is involved in processing of pre-18S rRNA                                                                                                    |
| YPL093W             | NOG1  | Putative GTPase that associates with free 60S ribosomal subunits in the nucleolus and is required for 60S ribosomal subunit biogenesis; member of the ODN family of nucleolar G-proteins                                                      |
| YHR197W             | RIX1  | RIbosome eXport; Protein required for cell viability                                                                                                                                                                                          |
| YDR165W             | TRM82 | Subunit of a tRNA methyltransferase complex composed of Trm8p and Trm82p that catalyzes 7-methylguanosine modification of tRNA                                                                                                                |
| YOR144C             | ELG1  | Protein required for S phase progression and telomere homeostasis, forms an alternative replication factor C complex important for DNA replication and genome integrity; mutants are sensitive to DNA damage                                  |
| YOR048C             | RAT1  | RNA trafficking protein; transcription activator                                                                                                                                                                                              |
| YKR024C             | DBP7  | Putative ATP-dependent RNA helicase of the DEAD-box family involved in ribosomal biogenesis                                                                                                                                                   |
| YDL150W             | RPC53 | RNA polymerase III subunit C53                                                                                                                                                                                                                |
| YOL041C             | NOP12 | Nucleolar protein, required for pre-25S rRNA processing; contains an RNA recognition motif (RRM) and has similarity to Nop13p, Nsr1p, and putative orthologs in Drosophila and S. pombe                                                       |



|           |        |                                                                                                                                                                                                                             |
|-----------|--------|-----------------------------------------------------------------------------------------------------------------------------------------------------------------------------------------------------------------------------|
| YNL207W   | RIO2   | Protein required for cell viability                                                                                                                                                                                         |
| YGR103W   | NOP7   | Nucleolar protein involved in rRNA processing and 60S ribosomal subunit biogenesis; constituent of several different pre-ribosomal particles                                                                                |
| YOL144W   | NOP8   | Nucleolar protein required for 60S ribosomal subunit biogenesis                                                                                                                                                             |
| YKL082C   | RRP14  | Required for normal pre-rRNA Processing; Protein required for cell viability                                                                                                                                                |
| YLR449W   | FPR4   | Nuclear protein, putative peptidyl-prolyl cis-trans isomerase (PPIase) with similarity to Fpr3p; overproduction suppresses the growth defect resulting from the absence of E3 ubiquitin-protein ligase Tom1p                |
| YHR169W   | DBP8   | Putative ATP-dependent RNA helicase of the DEAD-box family involved in biogenesis of the 40S ribosomal subunit                                                                                                              |
| YJR003C   | None   |                                                                                                                                                                                                                             |
| YCL059C   | KRR1   | Essential nucleolar protein required for the synthesis of 18S rRNA and for the assembly of 40S ribosomal subunit                                                                                                            |
| YFL034C-A | RPL22B | Protein component of the large (60S) ribosomal subunit, has similarity to Rpl22Ap and to rat L22 ribosomal protein                                                                                                          |
| YDL148C   | NOP14  | Nucleolar protein, forms a complex with Noc4p that mediates maturation and nuclear export of 40S ribosomal subunits; also present in the small subunit processome complex, which is required for processing of pre-18S rRNA |
| YOR091W   | None   |                                                                                                                                                                                                                             |
| YJL109C   | UTP10  | Nucleolar protein, component of the small subunit (SSU) processome containing the U3 snoRNA that is involved in processing of pre-18S rRNA                                                                                  |
| YNL292W   | PUS4   | catalyzes formation of Psi55 (modified uridine) in mitochondrial and cytoplasmic tRNAs; Pseudouridine synthase                                                                                                              |
| YGR228W   | None   |                                                                                                                                                                                                                             |
| YJL148W   | RPA34  | RNA polymerase I subunit A34.5                                                                                                                                                                                              |
| YMR239C   | RNT1   | RNAase III; cleaves a stem-loop structure at the 3' end of U2 snRNA to ensure formation of the correct U2 3' end                                                                                                            |
| YHR085W   | IPI1   | Protein of unknown function, essential for viability, may be involved in rRNA processing                                                                                                                                    |
| YDR496C   | PUF6   | member of the PUF protein family; YDR496C                                                                                                                                                                                   |
| YKR081C   | RPF2   | None                                                                                                                                                                                                                        |
| YAL025C   | MAK16  | Essential nuclear protein required for normal concentration of free 60S ribosomal subunits; required for maintenance of M1 satellite double-stranded RNA of the L-A virus                                                   |
| YLR074C   | BUD20  | Protein involved in bud-site selection; diploid mutants display a random budding pattern instead of the wild-type bipolar pattern                                                                                           |
| YCR016W   | None   |                                                                                                                                                                                                                             |
| YNR003C   | RPC34  | RNA polymerase III subunit C34; interacts with TFIIB70 and is a key determinant in pol III recruitment by the preinitiation complex                                                                                         |
| YHR081W   | LRP1   | Protein involved in homologous recombination and in non-homologous DNA end joining; homolog of mammalian C1D, which is a nuclear matrix protein involved in regulation of DNA repair and recombination                      |

|         |       |                                                                                                                                                                                                                                          |
|---------|-------|------------------------------------------------------------------------------------------------------------------------------------------------------------------------------------------------------------------------------------------|
| YJR002W | MPP10 | Component of the SSU processome, which is required for pre-18S rRNA processing, interacts with and controls the stability of Imp3p and Imp4p, essential for viability                                                                    |
| YIL020C | HIS6  | Phosphoribosyl-5-amino-1-phosphoribosyl-4-imidazolecarboxiamide isomerase, catalyzes the fourth step in histidine biosynthesis; mutations cause histidine auxotrophy and sensitivity to Cu, Co, and Ni salts                             |
| YDL036C | None  |                                                                                                                                                                                                                                          |
| YIL019W | FAF1  | Protein required for pre-rRNA processing and 40S ribosomal subunit assembly                                                                                                                                                              |
| YLR222C | UTP13 | Nucleolar protein, component of the small subunit (SSU) processome containing the U3 snoRNA that is involved in processing of pre-18S rRNA                                                                                               |
| YGR140W | CBF2  | Essential kinetochore protein, component of the CBF3 multisubunit complex that binds to the CDEIII region of the centromere; Cbf2p also binds to the CDEII region possibly forming a different multimeric complex, ubiquitinated in vivo |
| YKL014C | URB1  | Nucleolar protein required for the normal accumulation of 25S and 5.8S rRNAs, associated with the 27SA2 pre-ribosomal particle; proposed to be involved in the biogenesis of the 60S ribosomal subunit                                   |
| YLR287C | None  |                                                                                                                                                                                                                                          |
| YDR021W | FAL1  | Nucleolar protein required for maturation of 18S rRNA, member of the eIF4A subfamily of DEAD-box ATP-dependent RNA helicases                                                                                                             |
| YER006W | NUG1  | GTPase that associates with nuclear 60S pre-ribosomes, required for export of 60S ribosomal subunits from the nucleus                                                                                                                    |
| YCL054W | SPB1  | Suppressor of PaB1 mutant; encodes a S-adenosylmethionine-dependent methyltransferase; involved in 60S ribosomal subunit biogenesis and rRNA processing; Putative methyltransferase                                                      |
| YOR145C | PNO1  | Partner of Nob1; Protein required for cell viability                                                                                                                                                                                     |
| YDR399W | HPT1  | enzyme involved in de novo purine biosynthesis; hypoxanthine guanine phosphoribosyltransferase                                                                                                                                           |
| YKR056W | TRM2  | tRNA methyltransferase, 5-methylates the uridine residue at position 54 of tRNAs and may also have a role in tRNA stabilization or maturation; previously thought to be an endo-exonuclease                                              |
| YLR106C | MDN1  | Midasin, pseudo-hexameric assembly of AAA protomers associated with a C-terminal MIDAS-containing M-domain, associated with 60S pre-ribosomes (large subunit precursor) and their export from the nucleus                                |
| YLR129W | DIP2  | Nucleolar protein, specifically associated with the U3 snoRNA, part of the large ribonucleoprotein complex known as the small subunit (SSU) processome, required for 18S rRNA biogenesis, part of the active pre-rRNA processing complex |
| YMR131C | RRB1  | RiboSome Assembly 2                                                                                                                                                                                                                      |
| YKL009W | MRT4  | Protein involved in mRNA turnover and ribosome assembly, localizes to the nucleolus                                                                                                                                                      |
| YDR299W | BFR2  | Essential protein possibly involved in secretion; multicopy suppressor of sensitivity to Brefeldin A                                                                                                                                     |
| YOR252W | None  |                                                                                                                                                                                                                                          |

|         |        |                                                                                                                                                                                 |
|---------|--------|---------------------------------------------------------------------------------------------------------------------------------------------------------------------------------|
| YOL022C | None   |                                                                                                                                                                                 |
| YNL166C | BNI5   | Protein involved in organization of septins at the mother-bud neck, may interact directly with the Cdc11p septin, localizes to bud neck in a septin-dependent manner            |
| YNL182C | IPI3   | Protein required for cell viability; computational analysis of large-scale protein-protein interaction data suggests a possible role in assembly of the ribosomal large subunit |
| YNL132W | KRE33  | Essential protein of unknown function; heterozygous mutant shows haploinsufficiency in K1 killer toxin resistance                                                               |
| YKR060W | UTP30  | Possible U3 snoRNP protein involved in maturation of pre-18S rRNA, based on computational analysis of large-scale protein-protein interaction data                              |
| YOL109W | ZEO1   | Peripheral membrane protein of the plasma membrane that interacts with Mid2p; regulates the cell integrity pathway mediated by Pkc1p and Slr2p                                  |
| YGR173W | RBG2   | Protein with similarity to mammalian developmentally regulated GTP-binding protein                                                                                              |
| YPL126W | NAN1   | part of small (ribosomal) subunit (SSU) processosome (contains U3 snoRNA); Net1-Associated Nucleolar protein 1; Net1-Associated Nucleolar protein 1                             |
| YKL078W | DHR2   | Predominantly nucleolar DEAH-box RNA helicase, required for 18S rRNA synthesis                                                                                                  |
| YDR184C | ATC1   | Nuclear protein, possibly involved in regulation of cation stress responses and/or in the establishment of bipolar budding pattern                                              |
| YER127W | LCP5   | Essential protein involved in maturation of 18S rRNA; depletion leads to inhibited pre-rRNA processing and reduced polysome levels; localizes primarily to the nucleolus        |
| YDL031W | DBP10  | Essential protein involved in ribosome biogenesis; putative ATP-dependent RNA helicase of the DEAD-box protein family                                                           |
| YDL153C | SAS10  | part of small (ribosomal) subunit (SSU) processosome (contains U3 snoRNA); Something About Silencing 10; nuclear protein involved in silencing                                  |
| YNL112W | DBP2   | Essential ATP-dependent RNA helicase of the DEAD-box protein family, involved in nonsense-mediated mRNA decay and rRNA processing                                               |
| YFL002C | SPB4   | involved in the maturation of 25S ribosomal RNA; ATP-dependent RNA helicase                                                                                                     |
| YLR009W | RLP24  | Ribosomal Like Protein 24                                                                                                                                                       |
| YGR187C | HGH1   | Protein of unknown function with similarity to human HMG1 and HMG2; localizes to the cytoplasm                                                                                  |
| YGR145W | ENP2   | Essential protein of unknown function                                                                                                                                           |
| YHR154W | RTT107 | Regulator of Ty1 Transposition; Establishes Silent Chromatin; involved in silencing                                                                                             |
| YHR170W | NMD3   | putative Upf1p-interacting protein; cytoplasmic factor required for a late cytoplasmic assembly step of the 60S subunit                                                         |
| YDR324C | UTP4   | Nucleolar protein, component of the small subunit (SSU) processosome containing the U3 snoRNA that is involved in processing of pre-18S rRNA                                    |
| YMR179W | SPT21  | Protein required for normal transcription at several loci including HTA2-HTB2 and HHF2-HHT2, but not required at the other histone loci; functionally related to Spt10p         |

|         |       |                                                                                                                                                                                                                                     |
|---------|-------|-------------------------------------------------------------------------------------------------------------------------------------------------------------------------------------------------------------------------------------|
| YGL099W | LSG1  | Putative GTPase involved in 60S ribosomal subunit biogenesis; localized to the cytoplasm                                                                                                                                            |
| YDL213C | NOP6  | Protein with similarity to hydrophilins, which are involved in the adaptive response to hyperosmotic conditions; computational analysis of large-scale protein-protein interaction data suggests a possible role in rRNA processing |
| YPR110C | RPC40 | RNA polymerase subunit, common to RNA polymerase I and III                                                                                                                                                                          |
| YBL054W | None  |                                                                                                                                                                                                                                     |
| YPL239W | YAR1  | YAR1 encodes a 200-amino-acid protein with two ANK repeat motifs and an acidic C terminus rich in PEST-like sequences                                                                                                               |
| YDR465C | RMT2  | Arginine methyltransferase; ribosomal protein L12 is a substrate                                                                                                                                                                    |
| YDR449C | UTP6  | Nucleolar protein, component of the small subunit (SSU) processome containing the U3 snoRNA that is involved in processing of pre-18S rRNA                                                                                          |
| YNL114C | None  |                                                                                                                                                                                                                                     |
| YJL010C | None  |                                                                                                                                                                                                                                     |
| YDL208W | NHP2  | HMG-like nuclear protein                                                                                                                                                                                                            |
| YPR163C | TIF3  | Suppressor of translation mutants; Translation initiation factor eIF-4B                                                                                                                                                             |
| YLR051C | None  |                                                                                                                                                                                                                                     |
| YJL033W | HCA4  | Putative nucleolar DEAD box RNA helicase; high-copy number suppression of a U14 snoRNA processing mutant suggests an involvement in 18S rRNA synthesis                                                                              |
| YGR083C | GCD2  | Delta subunit of the translation initiation factor eIF2B, the guanine-nucleotide exchange factor for eIF2; activity subsequently regulated by phosphorylated eIF2; first identified as a negative regulator of GCN4 expression      |
| YPL044C | None  |                                                                                                                                                                                                                                     |
| YLR276C | DBP9  | ATP-dependent RNA helicase of the DEAD-box family involved in biogenesis of the 60S ribosomal subunit                                                                                                                               |
| YNR053C | NOG2  | Putative GTPase that associates with pre-60S ribosomal subunits in the nucleolus and is required for their nuclear export and maturation                                                                                            |
| YDR365C | ESF1  | Nucleolar protein involved in pre-rRNA processing; depletion causes severely decreased 18S rRNA levels                                                                                                                              |
| YGL171W | ROK1  | ATP-dependent RNA helicase of the DEAD box family; required for 18S rRNA synthesis                                                                                                                                                  |
| YDR083W | RRP8  | None                                                                                                                                                                                                                                |
| YOR004W | None  |                                                                                                                                                                                                                                     |
| YOR310C | NOP58 | Protein involved in pre-rRNA processing, 18S rRNA synthesis, and snoRNA synthesis; component of the small subunit processome complex, which is required for processing of pre-18S rRNA                                              |
| YNL022C | None  |                                                                                                                                                                                                                                     |
| YNL110C | NOP15 | Constituent of 66S pre-ribosomal particles, involved in 60S ribosomal subunit biogenesis; localizes to both nucleolus and cytoplasm                                                                                                 |
| YDL060W | TSR1  | Protein required for processing of 20S pre-rRNA in the cytoplasm, associates with pre-40S ribosomal particles                                                                                                                       |

|         |         |                                                                                                                                                                                                                                                              |
|---------|---------|--------------------------------------------------------------------------------------------------------------------------------------------------------------------------------------------------------------------------------------------------------------|
| YOR287C | None    |                                                                                                                                                                                                                                                              |
| YOR341W | RPA190  | RNA polymerase I subunit alpha; largest subunit of RNA polymerase I                                                                                                                                                                                          |
| YNL061W | NOP2    | Probable RNA m(5)C methyltransferase, essential for processing and maturation of 27S pre-rRNA and large ribosomal subunit biogenesis; localized to the nucleolus                                                                                             |
| YLR103C | CDC45   | DNA replication initiation factor; recruited to MCM pre-RC complexes at origins of replication; promotes disengagement of MCM from its anchor, Mcm10p, and recruits elongation machinery                                                                     |
| YKR079C | TRZ1    | Protein required for cell viability                                                                                                                                                                                                                          |
| YBR247C | ENP1    | Protein associated with U3 and U14 snoRNAs, required for pre-rRNA processing and 40S ribosomal subunit synthesis; localized in the nucleus and concentrated in the nucleolus                                                                                 |
| YLR336C | SGD1    | Suppressor of Glycerol Defect; may be involved in high osmolarity signaling pathway                                                                                                                                                                          |
| YDR120C | TRM1    | tRNA methyltransferase, localizes to both the nucleus and mitochondrion to produce the modified base N <sup>2</sup> ,N <sup>2</sup> -dimethylguanosine in tRNAs in both compartments                                                                         |
| YKL191W | DPH2    | Protein of unknown function, involved in diphtheria toxicity and diphthamide biosynthesis, not essential for viability                                                                                                                                       |
| YDR097C | MSH6    | Protein required for mismatch repair in mitosis and meiosis, forms a complex with Msh2p to repair both single-base & insertion-deletion mispairs; potentially phosphorylated by Cdc28p                                                                       |
| YDR361C | BCP1    | Essential protein involved in nuclear export of Mss4p, which is a lipid kinase that generates phosphatidylinositol 4,5-biphosphate and plays a role in actin cytoskeleton organization and vesicular transport                                               |
| YNL002C | RLP7    | Significant sequence similarity to RPL7B, but neither can functionally replace the other. Does not correspond to any ribosomal component identified so far, based on its biochemical features; Protein with similarity to ribosomal proteins including Rpl6p |
| YDL112W | TRM3    | 2'-O-ribose methyltransferase, catalyzes the ribose methylation of the guanosine nucleotide at position 18 of tRNAs                                                                                                                                          |
| YNL227C | JJJ1    | Protein that may function as a cochaperone, as suggested by the presence of a DnaJ-like domain                                                                                                                                                               |
| YNL113W | RPC19   | RNA polymerase subunit, common to RNA polymerases I and III                                                                                                                                                                                                  |
| YGR123C | PPT1    | Protein serine/threonine phosphatase with similarity to human phosphatase PP5; present in both the nucleus and cytoplasm; expressed during logarithmic growth                                                                                                |
| YGR162W | TIF4631 | also called eIF4 (eIF-4) gamma; mRNA cap-binding protein (eIF-4F), 150K subunit, highly homologous to Tif4632p, homologs of mammalian p220                                                                                                                   |
| YBL028C | None    |                                                                                                                                                                                                                                                              |
| YMR229C | RRP5    | Part of small ribosomal subunit (SSU) processosome containing U3 snoRNA); required for the synthesis of both 18S and 5.8S rRNAs                                                                                                                              |
| YPL043W | NOP4    | Nucleolar protein, essential for processing and maturation of                                                                                                                                                                                                |

|           |       |                                                                                                                                                                                                                                                                                                |
|-----------|-------|------------------------------------------------------------------------------------------------------------------------------------------------------------------------------------------------------------------------------------------------------------------------------------------------|
|           |       | 27S pre-rRNA and large ribosomal subunit biogenesis; contains four RNA recognition motifs (RRMs)                                                                                                                                                                                               |
| YLR435W   | TSR2  | Protein with a potential role in pre-rRNA processing                                                                                                                                                                                                                                           |
| YMR309C   | NIP1  | Protein required for nuclear import with some similarity to Nsr1p, another protein involved in nuclear transport; ~100 kDa cytoplasmic protein                                                                                                                                                 |
| YLL011W   | SOF1  | Nucleolar protein, part of the small (ribosomal) subunit (SSU) processosome that contains U3 snoRNA; has similarity to beta subunits of G-proteins and the splicing factor Prp4p                                                                                                               |
| YKL083W   | None  |                                                                                                                                                                                                                                                                                                |
| YDR211W   | GCD6  | Catalytic epsilon subunit of the translation initiation factor eIF2B, the guanine-nucleotide exchange factor for eIF2; activity subsequently regulated by phosphorylated eIF2; first identified as a negative regulator of GCN4 expression                                                     |
| YNL151C   | RPC31 | RNA polymerase III subunit C31; contains HMG-like C-terminal domain                                                                                                                                                                                                                            |
| YOR294W   | RRS1  | Essential protein that binds ribosomal protein L11 and is required for nuclear export of the 60S pre-ribosomal subunit during ribosome biogenesis; mouse homolog shows altered expression in Huntington's disease model mice                                                                   |
| YNL174W   | None  |                                                                                                                                                                                                                                                                                                |
| YGR280C   | PXR1  | Protein with a role in maturation of rRNAs and small nucleolar RNAs; Protein required for cell viability                                                                                                                                                                                       |
| YGR264C   | MES1  | Methionyl-tRNA synthetase, forms a complex with glutamyl-tRNA synthetase (Ygl245wp) and Arc1p, which increases the catalytic efficiency of both tRNA synthetases; also has a role in nuclear export of tRNAs                                                                                   |
| YCR072C   | None  |                                                                                                                                                                                                                                                                                                |
| YPL217C   | BMS1  | GTP-binding protein required for processing of 35S pre-rRNA at sites A0,                                                                                                                                                                                                                       |
| YMR049C   | ERB1  | Protein required for maturation of the 25S and 5.8S ribosomal RNAs; homologous to mammalian Bop1                                                                                                                                                                                               |
| YLR175W   | CBF5  | major low affinity 55 kDa Centromere/microtubule binding protein                                                                                                                                                                                                                               |
| YKL143W   | LTV1  | Protein required for growth at low temperature                                                                                                                                                                                                                                                 |
| YGL111W   | NSA1  | Constituent of 66S pre-ribosomal particles, involved in 60S ribosomal subunit biogenesis                                                                                                                                                                                                       |
| YMR290W-A | None  |                                                                                                                                                                                                                                                                                                |
| YML018C   | None  |                                                                                                                                                                                                                                                                                                |
| YER082C   | UTP7  | Nucleolar protein, component of the small subunit (SSU) processosome containing the U3 snoRNA that is involved in processing of pre-18S rRNA                                                                                                                                                   |
| YDL050C   | None  |                                                                                                                                                                                                                                                                                                |
| YOR243C   | PUS7  | pseudouridylates U2 snRNA at position 35                                                                                                                                                                                                                                                       |
| YIL091C   | None  |                                                                                                                                                                                                                                                                                                |
| YPR018W   | RLF2  | Chromatin Assembly Complex, subunit 1: largest (p90) subunit of three-subunit protein complex (yeast CAF-I) involved in DNA-replication-linked nucleosome assembly. Homol. to p150 subunit human Chromatin Assembly Factor-I (CAF-I); p90 subunit of yeast Chromatin Assembly Factor-I (CAF-I) |

|         |       |                                                                                                                                                                                                                                            |
|---------|-------|--------------------------------------------------------------------------------------------------------------------------------------------------------------------------------------------------------------------------------------------|
| YOL124C | None  |                                                                                                                                                                                                                                            |
| YOL010W | RCL1  | RNA terminal phosphate cyclase-like protein involved in rRNA processing at sites A0, A1, and A2; does not possess detectable RNA cyclase activity                                                                                          |
| YJL122W | None  |                                                                                                                                                                                                                                            |
| YJL050W | MTR4  | Dead-box family ATP dependent helicase required for mRNA export from the nucleus; co-factor of the exosome complex, required for 3' end formation of 5.8S rRNA                                                                             |
| YNL299W | TRF5  | TRF4 homolog; TRF4/5 function is required for proper mitosis; exhibits homology to Trf4p and Top1p                                                                                                                                         |
| YHR149C | SKG6  | Protein of unknown function found in the bud tip and bud neck, potential Cdc28p substrate                                                                                                                                                  |
| YNR054C | ESF2  | Protein required for cell viability                                                                                                                                                                                                        |
| YHR196W | UTP9  | Nucleolar protein, component of the small subunit (SSU) processome containing the U3 snoRNA that is involved in processing of pre-18S rRNA                                                                                                 |
| YER126C | NSA2  | Constituent of 66S pre-ribosomal particles, involved in 60S ribosomal subunit biogenesis                                                                                                                                                   |
| YOR047C | STD1  | Protein that interacts with the Snf1p protein kinase and Spt15p in two-hybrid and in in vitro binding studies                                                                                                                              |
| YOR119C | RIO1  | Essential protein that plays a role in cell cycle progression, has similarity to <i>C. elegans</i> ZK632.3 protein                                                                                                                         |
| YNL023C | FAP1  | Protein that binds to Fpr1p (FKBP12), conferring rapamycin resistance by competing with rapamycin for Fpr1p binding; has similarity to putative transcription factors, including <i>D. melanogaster</i> shuttle craft and human NFX1       |
| YIL127C | None  |                                                                                                                                                                                                                                            |
| YDL167C | NRP1  | Protein of unknown function, rich in asparagine residues                                                                                                                                                                                   |
| YPR136C | None  |                                                                                                                                                                                                                                            |
| YPR144C | NOC4  | Nucleolar protein, forms a complex with Nop14p that mediates maturation and nuclear export of 40S ribosomal subunits                                                                                                                       |
| YOR094W | ARF3  | GTP-binding ADP-ribosylation factor                                                                                                                                                                                                        |
| YOR078W | BUD21 | Component of small ribosomal subunit (SSU) processosome that contains U3 snoRNA; originally isolated as bud-site selection mutant that displays a random budding pattern                                                                   |
| YNL248C | RPA49 | RNA polymerase I subunit A49                                                                                                                                                                                                               |
| YGR128C | UTP8  | Nucleolar protein required for export of tRNAs from the nucleus; also copurifies with the small subunit (SSU) processome containing the U3 snoRNA that is involved in processing of pre-18S rRNA                                           |
| YLR063W | None  |                                                                                                                                                                                                                                            |
| YOL097C | WRS1  | Cytoplasmic tryptophanyl-tRNA synthetase, aminoacylates tryptophanyl-tRNA                                                                                                                                                                  |
| YLR409C | UTP21 | Possible U3 snoRNP protein involved in maturation of pre-18S rRNA, based on computational analysis of large-scale protein-protein interaction data                                                                                         |
| YHR065C | RRP3  | Required for maturation of the 35S primary transcript of pre-rRNA and is required for cleavages leading to mature 18S RNA; RRP3 is a DEAD box gene homologous to eIF-4a which encodes an RNA-dependent ATPase possessing helicase activity |

|         |       |                                                                                                                                                                                                                                                 |
|---------|-------|-------------------------------------------------------------------------------------------------------------------------------------------------------------------------------------------------------------------------------------------------|
|         |       | which is not specific for RNA                                                                                                                                                                                                                   |
| YMR290C | HAS1  | Putative ATP-dependent RNA helicase; localizes to both the nuclear periphery and nucleolus; highly enriched in nuclear pore complex fractions                                                                                                   |
| YHR088W | RPF1  | Nucleolar protein involved in the assembly of the large ribosomal subunit; contains a sigma(70)-like motif, which is thought to bind RNA                                                                                                        |
| YLL008W | DRS1  | Nucleolar DEAD-box protein required for ribosome assembly and function, including synthesis of 60S ribosomal subunits                                                                                                                           |
| YDR312W | SSF2  | high copy suppressor of G beta subunit temperature sensitive mutation; possibly involved in mating                                                                                                                                              |
| YDR152W | GIR2  | RWD domain containing protein of unknown function                                                                                                                                                                                               |
| YOR001W | RRP6  | Exonuclease component of the nuclear exosome; contributes to the quality-control system that retains and degrades aberrant mRNAs in the nucleus                                                                                                 |
| YER049W | None  |                                                                                                                                                                                                                                                 |
| YFR001W | LOC1  | Nuclear protein involved in asymmetric localization of ASH1 mRNA; binds double-stranded RNA in vitro                                                                                                                                            |
| YOR146W | None  |                                                                                                                                                                                                                                                 |
| YNL068C | FKH2  | Transcription factor of the forkhead family that regulates the cell cycle and pseudohyphal growth; also involved in chromatin silencing at HML and HMR; potential Cdc28p substrate                                                              |
| YNL308C | KRI1  | Essential nucleolar protein required for 40S ribosome biogenesis; physically and functionally interacts with Krr1p                                                                                                                              |
| YNL164C | IBD2  | Component of the BUB2-dependent spindle checkpoint pathway, interacts with Bfa1p and functions upstream of Bub2p and Bfa1p                                                                                                                      |
| YKR092C | SRP40 | Suppressor of mutant AC40 subunit of RNA polymerase I and III; nucleolar protein that is immunologically and structurally related to rat Nopp140, a nonribosomal protein of the nucleolus and coiled bodies.                                    |
| YAL036C | RBG1  | GTPase, interacts with ribosomes, has similarity to Xenopus GTP-binding protein DRG                                                                                                                                                             |
| YGR155W | CYS4  | Cystathionine beta-synthase, catalyzes the first committed step of transsulfuration in cysteine biosynthesis                                                                                                                                    |
| YDR101C | ARX1  | None                                                                                                                                                                                                                                            |
| YBR267W | REI1  | Protein of unknown function involved in bud growth in the mitotic signaling network; proposed negative regulator of Swe1p and Gin4p; contains dispersed C2H2 zinc finger domains                                                                |
| YAL059W | ECM1  | Protein of unknown function, localized in the nucleoplasm and the nucleolus, genetically interacts with MTR2 in 60S ribosomal protein subunit export                                                                                            |
| YLR196W | PWP1  | Protein with periodic tryptophan residues that resembles members of beta-transducin superfamily because of presence of WD-40 repeats; similar to beta-transducin superfamily                                                                    |
| YPL158C | None  |                                                                                                                                                                                                                                                 |
| YPL086C | ELP3  | Histone acetyltransferase subunit of the Elongator complex, which is a component of the RNA polymerase II holoenzyme; activity is directed specifically towards histones H3 and H4; disruption confers resistance to <i>K. lactis</i> zymotoxin |



|         |       |                                                                                                                                                                                                                                            |
|---------|-------|--------------------------------------------------------------------------------------------------------------------------------------------------------------------------------------------------------------------------------------------|
| YIR012W | SQT1  | Protein involved in a late step of 60S ribosomal subunit assembly or modification; contains multiple WD repeats; interacts with Qsr1p in the two-hybrid system                                                                             |
| YHR148W | IMP3  | Component of the SSU processome, which is required for pre-18S rRNA processing, essential protein that interacts with Mpp10p and mediates interactions of Imp4p and Mpp10p with U3 snoRNA                                                  |
| YKL172W | EBP2  | Essential protein required for the maturation of 25S rRNA and 60S ribosomal subunit assembly, localizes to the nucleolus                                                                                                                   |
| YDR060W | MAK21 | Protein required for large (60S) ribosomal subunit biogenesis; involved in nuclear export of pre-ribosomes; required for maintenance of dsRNA virus; homolog of human CAATT-binding protein                                                |
| YGL078C | DBP3  | Putative ATP-dependent RNA helicase of the DEAD-box family involved in ribosomal biogenesis                                                                                                                                                |
| YMR269W | None  |                                                                                                                                                                                                                                            |
| YDL063C | None  |                                                                                                                                                                                                                                            |
| YPR112C | MRD1  | Essential conserved protein that associates with 35S precursor rRNA and is required for its initial processing at the A(0)-A(2) cleavage sites, shows partial nucleolar localization, contains five consensus RNA-binding domains          |
| YOR206W | NOC2  | Protein that forms a nucleolar complex with Mak21p that binds to 90S and 66S pre-ribosomes, as well as a nuclear complex with Noc3p that binds to 66S pre-ribosomes; both complexes mediate intranuclear transport of ribosomal precursors |
| YGR200C | ELP2  | Elongator protein, part of the six-subunit RNA polymerase II Elongator histone acetyltransferase complex; target of Kluyveromyces lactis zymocin                                                                                           |
| YIL096C | None  |                                                                                                                                                                                                                                            |
| YOR359W | VTS1  | None                                                                                                                                                                                                                                       |
| YLR401C | DUS3  | Dihydrouridine synthase, member of a widespread family of conserved proteins including Smm1p, Dus1p, and Dus4p; contains a consensus oleate response element (ORE) in its promoter region                                                  |
| YKL113C | RAD27 | 5' to 3' exonuclease, 5' flap endonuclease, required for Okazaki fragment processing and maturation as well as for long-patch base-excision repair; member of the S. pombe RAD2/FEN1 family                                                |
| YCR057C | PWP2  | part of small (ribosomal) subunit (SSU) processosome (contains U3 snoRNA); Eight WD-repeats with homology with G protein beta subunits flanked by nonhomologous N-terminal and C-terminal extensions; regulatory protein                   |
| YFL023W | BUD27 | Protein involved in bud-site selection, nutrient signaling, and gene expression controlled by the TOR kinase; diploid mutants display a random budding pattern instead of the wild-type bipolar pattern                                    |
| YPL146C | None  |                                                                                                                                                                                                                                            |
| YIR026C | YVH1  | nitrogen starvation-induced protein phosphatase                                                                                                                                                                                            |
| YLL034C | RIX7  | Putative ATPase of the AAA family, required for export of pre-ribosomal large subunits from the nucleus; distributed between                                                                                                               |

|                              |       |                                                                                                                                                                                                                     |
|------------------------------|-------|---------------------------------------------------------------------------------------------------------------------------------------------------------------------------------------------------------------------|
|                              |       | the nucleolus, nucleoplasm, and nuclear periphery depending on growth conditions                                                                                                                                    |
| (45) MODULE 52               |       |                                                                                                                                                                                                                     |
| <b>Expression regulators</b> |       |                                                                                                                                                                                                                     |
| YHR030C                      | SLT2  | Suppressor of <i>lyt2</i> ; serine/threonine MAP kinase                                                                                                                                                             |
| YDL170W                      | UGA3  | Transcriptional activator necessary for gamma-aminobutyrate (GABA)-dependent induction of GABA genes (such as UGA1, UGA2, UGA4); zinc-finger transcription factor of the Zn(2)-Cys(6) binuclear cluster domain type |
| <b>Genotype regulators</b>   |       |                                                                                                                                                                                                                     |
| M10_22213_34098              |       | NUC1(1,2) CBP1(6,3) PEX2(1,6) YJL211C OPT1(3,6) YJL213W HXT8(93,12) YJL215C YJL216C YJL217W YJL218W HXT9(12,50) YJL220W FSP2(4,32) VTH2(323,435)                                                                    |
| M6_38648_48224               |       | TUB2(1,1) YPT1(0,1) ACT1(3,5) YFL040W FET5(4,1) YFL041W-A YFL042C YFL043C YOD1(1,0) SEC53(0,2) FMP32(1,3) RGD2(5,3) EMP47(4,3) YFL049W ALR2(19,15) YFL051C YFL052W                                                  |
| <b>Module genes</b>          |       |                                                                                                                                                                                                                     |
| YFL052W                      | None  |                                                                                                                                                                                                                     |
| YFL054C                      | None  |                                                                                                                                                                                                                     |
| YFL053W                      | DAK2  | Dihydroxyacetone kinase, required for detoxification of dihydroxyacetone (DHA); involved in stress adaptation                                                                                                       |
| YDL244W                      | THI13 | Protein involved in synthesis of the thiamine precursor hydroxymethylpyrimidine (HMP); member of a subtelomeric gene family including <i>THI5</i> , <i>THI11</i> , <i>THI12</i> , and <i>THI13</i>                  |
| YNL331C                      | AAD14 | Putative aryl-alcohol dehydrogenase with similarity to <i>P. chrysosporium</i> aryl-alcohol dehydrogenase; mutational analysis has not yet revealed a physiological role                                            |
| YFL056C                      | AAD6  | Putative aryl-alcohol dehydrogenase with similarity to <i>P. chrysosporium</i> aryl-alcohol dehydrogenase, involved in the oxidative stress response                                                                |
| YFL055W                      | AGP3  | Low-affinity amino acid permease, may act to supply the cell with amino acids as nitrogen source in nitrogen-poor conditions; transcription is induced under conditions of sulfur limitation                        |
| (46) MODULE 53               |       |                                                                                                                                                                                                                     |
| <b>Expression regulators</b> |       |                                                                                                                                                                                                                     |
| YPL230W                      | None  |                                                                                                                                                                                                                     |
| YLL019C                      | KNS1  | Nonessential putative protein kinase of unknown cellular role; member of the LAMMER family of protein kinases, which are serine/threonine kinases also capable of phosphorylating tyrosine residues                 |
| YPL230W                      | None  |                                                                                                                                                                                                                     |
| YOL113W                      | SKM1  | Serine/threonine protein kinase with similarity to Ste20p and Cla4p                                                                                                                                                 |
| YLR150W                      | STM1  | Protein that binds quadruplex nucleic acids; multicopy suppressor of <i>tom1</i> and <i>pop2</i> mutations; acts with Cdc13p to maintain telomere structure                                                         |
| YLL019C                      | KNS1  | Nonessential putative protein kinase of unknown cellular role; member of the LAMMER family of protein kinases, which are                                                                                            |

|                     |        |                                                                                                                                                                                                                                            |
|---------------------|--------|--------------------------------------------------------------------------------------------------------------------------------------------------------------------------------------------------------------------------------------------|
|                     |        | serine/threonine kinases also capable of phosphorylating tyrosine residues                                                                                                                                                                 |
| <b>Module genes</b> |        |                                                                                                                                                                                                                                            |
| YOL084W             | PHM7   | Protein of unknown function, expression is regulated by phosphate levels; green fluorescent protein (GFP)-fusion protein localizes to the cell periphery and vacuole                                                                       |
| YHR140W             | None   |                                                                                                                                                                                                                                            |
| YDL046W             | NPC2   | Putative homolog of human NPC2/He1, which is a cholesterol-binding protein whose deficiency causes Niemann-Pick type C2 disease involving retention of cholesterol in lysosomes                                                            |
| YLR289W             | GUF1   | Mitochondrial GTPase of unknown function, similar to E. coli elongation factor-type GTP-binding protein LepA and to LK1236.1 from <i>Caenorhabditis elegans</i>                                                                            |
| YOR028C             | CIN5   | Basic leucine zipper transcriptional factor of the yAP-1 family that mediates pleiotropic drug resistance and salt tolerance; localizes constitutively to the nucleus                                                                      |
| YNL173C             | MDG1   | Plasma membrane protein involved in G-protein mediated pheromone signaling pathway; overproduction suppresses bem1 mutations                                                                                                               |
| YHR034C             | PIH1   | Protein possibly involved in protein synthesis                                                                                                                                                                                             |
| YGR086C             | PIL1   | Long chain base-responsive inhibitor of protein kinases Phk1p and Phk2p, acts along with Lsp1p to down-regulate heat stress resistance via regulation of the Pkc1p and Ypk1p pathways; phosphorylated by Phk1p and Phk2p                   |
| YDR406W             | PDR15  | ATP binding cassette (ABC) transporter of the plasma membrane; general stress response factor implicated in cellular detoxification; target of Pdr1p, Pdr3p and Pdr8p transcription regulators; promoter contains a PDR responsive element |
| YOR031W             | CRS5   | Copper-binding metallothionein, required for wild-type copper resistance                                                                                                                                                                   |
| YOR161C             | PNS1   | Protein of unknown function; has similarity to Torpedo californica tCTL1p, which is postulated to be a choline transporter, neither null mutation nor overexpression affects choline transport                                             |
| YJL016W             | None   |                                                                                                                                                                                                                                            |
| YHR033W             | None   |                                                                                                                                                                                                                                            |
| YNR036C             | None   |                                                                                                                                                                                                                                            |
| YGL226W             | None   |                                                                                                                                                                                                                                            |
| YOR125C             | CAT5   | may encode a protein involved in one or more monooxygenase or hydroxylase steps of ubiquinone biosynthesis                                                                                                                                 |
| YPR149W             | NCE102 | involved in secretion of proteins that lack classical secretory signal sequences; Involved in secretion of proteins that lack classical secretory signal sequences                                                                         |
| YOL053W             | None   |                                                                                                                                                                                                                                            |
| YMR031C             | None   |                                                                                                                                                                                                                                            |
| YDL049C             | KNH1   | Protein with similarity to Kre9p, which is involved in cell wall beta 1,6-glucan synthesis; overproduction suppresses growth defects of a kre9 null mutant                                                                                 |
| YIL101C             | XBP1   | Transcriptional repressor that binds to promoter sequences of the cyclin genes, CYS3, and SMF2; expression is induced by stress                                                                                                            |

|           |       |                                                                                                                                                                                                                                     |
|-----------|-------|-------------------------------------------------------------------------------------------------------------------------------------------------------------------------------------------------------------------------------------|
|           |       | or starvation during mitosis, and late in meiosis; member of the Swi4p/Mbp1p family; potential Cdc28p substrate                                                                                                                     |
| YNL100W   | None  |                                                                                                                                                                                                                                     |
| YOL047C   | None  |                                                                                                                                                                                                                                     |
| YKL150W   | MCR1  | Mitochondrial NADH-cytochrome b5 reductase, involved in ergosterol biosynthesis                                                                                                                                                     |
| YKL062W   | MSN4  | Transcriptional activator related to Msn2p; activated in stress conditions, which results in translocation from the cytoplasm to the nucleus; binds DNA at stress response elements of responsive genes, inducing gene expression   |
| YLL020C   | None  |                                                                                                                                                                                                                                     |
| YOR062C   | None  |                                                                                                                                                                                                                                     |
| YMR244C-A | None  |                                                                                                                                                                                                                                     |
| YBR091C   | MRS5  | Essential protein of the inner mitochondrial membrane, peripherally localized; component of the TIM22 complex, which is a twin-pore translocase that mediates insertion of numerous multispinning inner membrane proteins           |
| YHR044C   | DOG1  | 2-deoxyglucose-6-phosphate phosphatase, similar to Dog2p, member of a family of low molecular weight phosphatases; confers 2-deoxyglucose resistance when overexpressed, in vivo substrate has not yet been identified              |
| YIL087C   | None  |                                                                                                                                                                                                                                     |
| YGR230W   | BNS1  | Protein with some similarity to Spo12p; overexpression bypasses need for Spo12p, but not required for meiosis                                                                                                                       |
| YPL161C   | BEM4  | Protein involved in establishment of cell polarity and bud emergence; interacts with the Rho1p small GTP-binding protein and with the Rho-type GTPase Cdc42p                                                                        |
| YHL024W   | RIM4  | Regulator of IMe2 expression; RNA-binding protein of the RRM class (putative)                                                                                                                                                       |
| YER097W   | None  |                                                                                                                                                                                                                                     |
| YNL234W   | None  |                                                                                                                                                                                                                                     |
| YCR083W   | TRX3  | mitochondrial thioredoxin                                                                                                                                                                                                           |
| YMR031W-A | None  |                                                                                                                                                                                                                                     |
| YER062C   | HOR2  | One of two redundant DL-glycerol-3-phosphatases (RHR2/GPP1 encodes the other) involved in glycerol biosynthesis; induced in response to hyperosmotic stress and oxidative stress, and during the diauxic transition                 |
| YGL208W   | SIP2  | Member of a family of proteins, including Sip1p and Gal83p, that interact with Snf1p and Snf4p and are involved in the response to glucose starvation; component of Snf1 protein complex involved in response to glucose starvation |
| YDR216W   | ADR1  | Positive transcriptional regulator, controls the expression of ADH2, peroxisomal protein genes, and genes required for ethanol, glycerol, and fatty acid utilization                                                                |
| YGR243W   | FMP43 | The authentic, non-tagged protein was localized to mitochondria                                                                                                                                                                     |
| YMR254C   | None  |                                                                                                                                                                                                                                     |
| YJR127C   | ZMS1  | Zinc-finger protein that localizes to the nucleus, putative transcriptional regulator of ALD6                                                                                                                                       |
| YJR119C   | None  |                                                                                                                                                                                                                                     |

| (47) MODULE 54               |       |                                                                                                                                                                                                                                             |
|------------------------------|-------|---------------------------------------------------------------------------------------------------------------------------------------------------------------------------------------------------------------------------------------------|
| <b>Expression regulators</b> |       |                                                                                                                                                                                                                                             |
| YGR233C                      | PHO81 | Cyclin-dependent kinase (CDK) inhibitor, regulates Pho80p-Pho85p and Pcl7p-Pho85p cyclin-CDK complexes in response to phosphate levels; required for derepression of PHO5; transcriptionally regulated by Pho4p and Pho2p                   |
| YOL113W                      | SKM1  | Serine/threonine protein kinase with similarity to Ste20p and Cla4p                                                                                                                                                                         |
| YER177W                      | BMH1  | 14-3-3 protein, major isoform; binds proteins and DNA, involved in regulation of many processes including exocytosis and vesicle transport, Ras/MAPK signaling during pseudohyphal development, rapamycin-sensitive signaling, and others   |
| YBR083W                      | TEC1  | transcription factor of the TEA/ATTS DNA-binding domain family, regulator of Ty1 expression                                                                                                                                                 |
| YDL230W                      | PTP1  | phosphotyrosine-specific protein phosphatase                                                                                                                                                                                                |
| <b>Genotype regulators</b>   |       |                                                                                                                                                                                                                                             |
| M13_27644_28694              |       | YML116W-A NAB6(7,1) YML117W-A NGL3(3,3) YML119W NDI1(1,1) GTR1(0,50) YML122C PHO84(2,48) TUB3(8,0) YML125C ERG13(0,0) RSC9(0,0)                                                                                                             |
| <b>Module genes</b>          |       |                                                                                                                                                                                                                                             |
| YFR042W                      | None  |                                                                                                                                                                                                                                             |
| YKR091W                      | SRL3  | Cytoplasmic protein that, when overexpressed, suppresses the lethality of a rad53 null mutation; potential Cdc28p substrate                                                                                                                 |
| YMR245W                      | None  |                                                                                                                                                                                                                                             |
| YDL118W                      | None  |                                                                                                                                                                                                                                             |
| YBR193C                      | MED8  | Member of RNA Polymerase II transcriptional regulation mediator; Stoichiometric member of mediator complex                                                                                                                                  |
| YAL064W                      | None  |                                                                                                                                                                                                                                             |
| YJL032W                      | None  |                                                                                                                                                                                                                                             |
| YOL133W                      | HRT1  | RING finger containing subunit of Skp1-Cullin-F-box ubiquitin protein ligases (SCF); required for Gic2p, Far1p, Sic1p and Cln2p degradation; may tether Cdc34p (a ubiquitin conjugating enzyme or E2) and Cdc53p (a cullin) subunits of SCF |
| YKL158W                      | None  |                                                                                                                                                                                                                                             |
| YDR256C                      | CTA1  | Catalase A, breaks down hydrogen peroxide in the peroxisomal matrix formed by acyl-CoA oxidase (Pox1p) during fatty acid beta-oxidation                                                                                                     |
| YPR130C                      | None  |                                                                                                                                                                                                                                             |
| YGR137W                      | None  |                                                                                                                                                                                                                                             |
| YDR327W                      | None  |                                                                                                                                                                                                                                             |
| YOR024W                      | None  |                                                                                                                                                                                                                                             |
| YIR020C                      | None  |                                                                                                                                                                                                                                             |
| YJL119C                      | None  |                                                                                                                                                                                                                                             |
| YPL169C                      | MEX67 | Involved in nuclear mRNA export, binds both poly(A); a poly(A)+RNA binding protein                                                                                                                                                          |
| YDR223W                      | CRF1  | Protein of unknown function, potentially phosphorylated by Cdc28p                                                                                                                                                                           |

|                              |       |                                                                                                                                                                                                                                                  |
|------------------------------|-------|--------------------------------------------------------------------------------------------------------------------------------------------------------------------------------------------------------------------------------------------------|
| YGR188C                      | BUB1  | checkpoint gene involved in permitting entry into mitosis depending upon the assembly state of microtubules; Serine/threonine protein kinase required for cell cycle arrest in response to loss of microtubule function                          |
| YNL238W                      | KEX2  | Subtilisin-like protease (proprotein convertase), a calcium-dependent serine protease involved in the activation of proproteins of the secretory pathway                                                                                         |
| YCL001W-A                    | None  |                                                                                                                                                                                                                                                  |
| YNL211C                      | None  |                                                                                                                                                                                                                                                  |
| YOR190W                      | SPR1  | Sporulation regulated genes; sporulation-specific exo-1,3-beta-glucanase                                                                                                                                                                         |
| YJL022W                      | None  |                                                                                                                                                                                                                                                  |
| YFL020C                      | PAU5  | Part of 23-member seripauperin multigene family encoded mainly in subtelomeric regions, active during alcoholic fermentation, regulated by anaerobiosis, negatively regulated by oxygen, repressed by heme                                       |
| YPL200W                      | CSM4  | Protein required for accurate chromosome segregation during meiosis                                                                                                                                                                              |
| (48) MODULE 55               |       |                                                                                                                                                                                                                                                  |
| <b>Expression regulators</b> |       |                                                                                                                                                                                                                                                  |
| YDR195W                      | REF2  | RNA-binding protein involved in the cleavage step of mRNA 3'-end formation prior to polyadenylation; also involved in snoRNA maturation                                                                                                          |
| YFL031W                      | HAC1  | bZIP transcription factor (ATF/CREB1 homolog) that regulates the unfolded-protein response, via UPRE binding, and membrane biogenesis; ER stress-induced splicing pathway utilizing Ire1p, Trl1p and Ada5p facilitates efficient Hac1p synthesis |
| YGL037C                      | PNC1  | NAD(+) salvage pathway gene; pyrazinamidase and nicotinamidase                                                                                                                                                                                   |
| YJL103C                      | None  |                                                                                                                                                                                                                                                  |
| <b>Module genes</b>          |       |                                                                                                                                                                                                                                                  |
| YNL140C                      | None  |                                                                                                                                                                                                                                                  |
| YPR111W                      | DBF20 | Ser/Thr kinase involved in late nuclear division, one of the mitotic exit network (MEN) proteins; necessary for the execution of cytokinesis                                                                                                     |
| YFL033C                      | RIM15 | RIM15 is glucose-repressed; RIM15 is required for IME2 expression; Trehalose-associated protein kinase related to <i>S. pombe</i> cek1+                                                                                                          |
| YAL029C                      | MYO4  | Required for mother-specific HO expression, for the bud tip localization of ASH1 and IST2 mRNA; facilitates growth and orientation of ER tubules along with She3p; myosin                                                                        |
| YLR124W                      | None  |                                                                                                                                                                                                                                                  |
| YDR219C                      | None  |                                                                                                                                                                                                                                                  |
| YML124C                      | TUB3  | Alpha-tubulin; associates with beta-tubulin (Tub2p) to form tubulin dimer, which polymerizes to form microtubules; expressed at lower level than Tub1p                                                                                           |
| YGL178W                      | MPT5  | Protein that specifically binds to mRNAs encoding chromatin modifiers and spindle pole body components; has roles in longevity, in maintenance of cell wall integrity, and in                                                                    |

|           |       |                                                                                                                                                                                                                                                   |
|-----------|-------|---------------------------------------------------------------------------------------------------------------------------------------------------------------------------------------------------------------------------------------------------|
|           |       | sensitivity to and recovery from pheromone arrest                                                                                                                                                                                                 |
| YER056C   | FCY2  | Purine-cytosine permease, mediates purine (adenine, guanine, and hypoxanthine) and cytosine accumulation                                                                                                                                          |
| YGL166W   | CUP2  | Copper-binding transcription factor; activates transcription of the metallothionein genes CUP1-1 and CUP1-2 in response to elevated copper concentrations                                                                                         |
| YNL128W   | TEP1  | Similar to human tumor suppressor gene known as TEP1, MMAC1 and PTEN1; Putative protein tyrosine phosphatase                                                                                                                                      |
| YJL097W   | None  |                                                                                                                                                                                                                                                   |
| YKL147C   | None  |                                                                                                                                                                                                                                                   |
| YOR213C   | SAS5  | Protein involved in silencing at telomeres, HML, and HMR                                                                                                                                                                                          |
| YHR021W-A | ECM12 | Non-essential protein of unknown function                                                                                                                                                                                                         |
| YLR422W   | None  |                                                                                                                                                                                                                                                   |
| YDR431W   | None  |                                                                                                                                                                                                                                                   |
| YOR237W   | HES1  | Protein implicated in the regulation of ergosterol biosynthesis; one of a seven member gene family with a common essential function and non-essential unique functions; similar to human oxysterol binding protein (OSBP)                         |
| YNR025C   | None  |                                                                                                                                                                                                                                                   |
| YNR072W   | HXT17 | Protein of unknown function with similarity to hexose transporter family members, expression is repressed by high levels of glucose                                                                                                               |
| YEL017W   | GTT3  | Protein of unknown function with a possible role in glutathione metabolism, as suggested by computational analysis of large-scale protein-protein interaction data; GFP-fusion protein localizes to the nuclear periphery                         |
| YEL041W   | None  |                                                                                                                                                                                                                                                   |
| YLR411W   | CTR3  | High-affinity copper transporter of the plasma membrane, acts as a trimer; gene is disrupted by a Ty2 transposon insertion in many laboratory strains of <i>S. cerevisiae</i>                                                                     |
| YMR228W   | MTF1  | Mitochondrial RNA polymerase sigma-like specificity factor required for promoter recognition, interacts with mitochondrial core polymerase Rpo41p, imported into mitochondria via a novel process requiring most of the Mtf1p sequence            |
| YKR015C   | None  |                                                                                                                                                                                                                                                   |
| YJL216C   | None  |                                                                                                                                                                                                                                                   |
| YDR370C   | None  |                                                                                                                                                                                                                                                   |
| YIL170W   | None  |                                                                                                                                                                                                                                                   |
| YMR013C   | SEC59 | Membrane protein that catalyzes the CTP-mediated phosphorylation of dolichol, the terminal step in dolichyl monophosphate (Dol-P) biosynthesis; required for viability, normal rates of lipid intermediate synthesis, and protein N-glycosylation |
| YPL132W   | COX11 | Mitochondrial membrane protein required for assembly of active cytochrome c oxidase, probably involved in insertion of Cu(B) and magnesium                                                                                                        |
| YGL132W   | None  |                                                                                                                                                                                                                                                   |
| YBR240C   | THI2  | Zinc finger protein of the Zn(II)2Cys6 type, probable transcriptional activator of thiamine biosynthetic genes                                                                                                                                    |

|                              |           |                                                                                                                                                                                                                                                                                                                                                                                     |
|------------------------------|-----------|-------------------------------------------------------------------------------------------------------------------------------------------------------------------------------------------------------------------------------------------------------------------------------------------------------------------------------------------------------------------------------------|
| <b>(49) MODULE 56</b>        |           |                                                                                                                                                                                                                                                                                                                                                                                     |
| <b>Expression regulators</b> |           |                                                                                                                                                                                                                                                                                                                                                                                     |
| YCL055W                      | KAR4      | Transcription factor required for induction of KAR3 and CIK1 during mating, also required during meiosis; exists in two forms, a slower-migrating form more abundant during vegetative growth and a faster-migrating form induced by pheromone                                                                                                                                      |
| YGR156W                      | PTI1      | Pta1p Interacting protein                                                                                                                                                                                                                                                                                                                                                           |
| <b>Genotype regulators</b>   |           |                                                                                                                                                                                                                                                                                                                                                                                     |
| M9_214482_254745             |           | NEO1(0,4) DFG10(4,6) PCL7(1,2) MMF1(1,2) RPL34B(13,11) RHR2(0,7) YIL054W YIL055C YIL056W YIL057C YIL058W YIL059C YIL060W SNP1(3,132) ARC15(0,2) YRB2(3,1) YIL064W FIS1(0,1) RNR3(2,6) YIL066W-A YIL067C SEC6(0,0) YIL068W-A RPS24B(1,2) MAM33(0,0) PCI8(0,0) YIL071W-A HOP1(1,9) SPO22(218,0) SER33(1,0) RPN2(0,0) SEC28(0,4) YIL077C THS1(2,4) AIR1(3,4) YIL080W YIL082W YIL082W-A |
| <b>Module genes</b>          |           |                                                                                                                                                                                                                                                                                                                                                                                     |
| YIL080W                      | None      |                                                                                                                                                                                                                                                                                                                                                                                     |
| YIL082W-A                    | None      |                                                                                                                                                                                                                                                                                                                                                                                     |
| YIL049W                      | DFG10     | Protein of unknown function, involved in filamentous growth                                                                                                                                                                                                                                                                                                                         |
| YIL082W                      | None      |                                                                                                                                                                                                                                                                                                                                                                                     |
| <b>(50) MODULE 57</b>        |           |                                                                                                                                                                                                                                                                                                                                                                                     |
| <b>Expression regulators</b> |           |                                                                                                                                                                                                                                                                                                                                                                                     |
| YCR040W                      | MATALPHA1 | Transcriptional co-activator involved in regulation of mating-type-specific gene expression; targets the transcription factor Mcm1p to the promoters of alpha-specific genes; one of two genes encoded by the alpha mating type cassette                                                                                                                                            |
| YCL055W                      | KAR4      | Transcription factor required for induction of KAR3 and CIK1 during mating, also required during meiosis; exists in two forms, a slower-migrating form more abundant during vegetative growth and a faster-migrating form induced by pheromone                                                                                                                                      |
| <b>Module genes</b>          |           |                                                                                                                                                                                                                                                                                                                                                                                     |
| YFL025C                      | BST1      | Protein that negatively regulates COPII vesicle formation; functionally complements mammalian PGAP1, which is a GPI inositol-deacylase involved in GPI maturation; negative regulator of COPII vesicle formation                                                                                                                                                                    |
| YCR097W                      | HMRA1     | Silenced copy of A1, encoding a homeobox-domain containing corepressor that interacts with Alpha2p to repress haploid-specific gene transcription in diploid cells                                                                                                                                                                                                                  |
| YGL033W                      | HOP2      | Meiosis-specific protein that localizes to chromosomes, preventing synapsis between nonhomologous chromosomes and ensuring synapsis between homologs; complexes with Mnd1p to promote homolog pairing and meiotic double-strand break repair                                                                                                                                        |
| YIL015W                      | BAR1      | Aspartyl protease secreted into the periplasmic space of mating type a cells, cleaves and inactivates alpha factor allowing cells to recover from alpha-factor-induced cell cycle arrest                                                                                                                                                                                            |
| YJL170C                      | ASG7      | an a-specific gene that is induced to a higher expression level by alpha factor; An a-specific gene that is induced to a higher expression level by alpha factor                                                                                                                                                                                                                    |



|                              |      |                                                                                                                                                                                                                                                  |
|------------------------------|------|--------------------------------------------------------------------------------------------------------------------------------------------------------------------------------------------------------------------------------------------------|
| YHR178W                      | STB5 | binds Sin3p in two-hybrid assay; Zinc finger (6-Cys)                                                                                                                                                                                             |
| YOL025W                      | LAG2 | affects longevity; involved in determination of longevity                                                                                                                                                                                        |
| YLR288C                      | MEC3 | Involved in checkpoint control and DNA repair; forms a clamp with Rad17p and Ddc1p that is loaded onto partial duplex DNA; DNA damage checkpoint protein                                                                                         |
| YNL145W                      | MFA2 | lipopeptide mating pheromone; mating a-factor pheromone precursor                                                                                                                                                                                |
| YFL027C                      | GYP8 | GTPase-activating protein for yeast Rab family members; Ypt1p is the preferred in vitro substrate but also acts on Sec4p, Ypt31p and Ypt32p; involved in the regulation of ER to Golgi vesicle transport                                         |
| YGL032C                      | AGA2 | Adhesion subunit of a-agglutinin of a-cells, C-terminal sequence acts as a ligand for alpha-agglutinin (Sag1p) during agglutination, modified with O-linked oligomannosyl chains, linked to anchorage subunit Aga1p via two disulfide bonds      |
| YFL026W                      | STE2 | alpha-factor pheromone receptor; seven-transmembrane domain protein                                                                                                                                                                              |
| YCR097W-A                    | None |                                                                                                                                                                                                                                                  |
| YKL209C                      | STE6 | ABC transporter, glycoprotein, component of a-factor secretory pathway                                                                                                                                                                           |
| YDR461W                      | MFA1 | a-factor mating pheromone precursor                                                                                                                                                                                                              |
| (51) MODULE 58               |      |                                                                                                                                                                                                                                                  |
| <b>Expression regulators</b> |      |                                                                                                                                                                                                                                                  |
| YFL031W                      | HAC1 | bZIP transcription factor (ATF/CREB1 homolog) that regulates the unfolded-protein response, via UPRE binding, and membrane biogenesis; ER stress-induced splicing pathway utilizing Ire1p, Trl1p and Ada5p facilitates efficient Hac1p synthesis |
| YGL166W                      | CUP2 | Copper-binding transcription factor; activates transcription of the metallothionein genes CUP1-1 and CUP1-2 in response to elevated copper concentrations                                                                                        |
| YGR014W                      | MSB2 | Protein that functions as an osmosensor in parallel to the Sho1p-mediated pathway, multicopy suppressor of a temperature-sensitive mutation in CDC24, potential Cdc28p substrate                                                                 |
| YKL126W                      | YPK1 | 76.5 kDa Serine/threonine protein kinase with similarity to protein kinase C, is 90% identical to Ypk2p                                                                                                                                          |
| YPL026C                      | SKS1 | multicopy suppressor of snf3 and grr1 mutants; serine/threonine protein kinase homologous to Ran1p                                                                                                                                               |
| YGL166W                      | CUP2 | Copper-binding transcription factor; activates transcription of the metallothionein genes CUP1-1 and CUP1-2 in response to elevated copper concentrations                                                                                        |
| YKL126W                      | YPK1 | 76.5 kDa Serine/threonine protein kinase with similarity to protein kinase C, is 90% identical to Ypk2p                                                                                                                                          |
| <b>Module genes</b>          |      |                                                                                                                                                                                                                                                  |
| YGL074C                      | None |                                                                                                                                                                                                                                                  |
| YML032C-A                    | None |                                                                                                                                                                                                                                                  |
| YLR374C                      | None |                                                                                                                                                                                                                                                  |
| YBL108W                      | None |                                                                                                                                                                                                                                                  |
| YLL037W                      | None |                                                                                                                                                                                                                                                  |

|           |       |                                                                                                                                                        |
|-----------|-------|--------------------------------------------------------------------------------------------------------------------------------------------------------|
| YDR455C   | None  |                                                                                                                                                        |
| YFR056C   | None  |                                                                                                                                                        |
| YDL062W   | None  |                                                                                                                                                        |
| YDR187C   | None  |                                                                                                                                                        |
| YDR538W   | PAD1  | Phenylacrylic acid decarboxylase, confers resistance to cinnamic acid, decarboxylates aromatic carboxylic acids to the corresponding vinyl derivatives |
| YDL026W   | None  |                                                                                                                                                        |
| YPR092W   | None  |                                                                                                                                                        |
| YLR140W   | None  |                                                                                                                                                        |
| YML117W-A | None  |                                                                                                                                                        |
| YLR349W   | None  |                                                                                                                                                        |
| YMR159C   | ATG16 | Protein that interacts with the Atg12p-Atg5p conjugate during formation of the pre-autophagosomal structure; essential for autophagy                   |
| YGL239C   | None  |                                                                                                                                                        |
| YJR079W   | None  |                                                                                                                                                        |
| YGR064W   | None  |                                                                                                                                                        |
| YLR169W   | None  |                                                                                                                                                        |
| YKL162C-A | None  |                                                                                                                                                        |
| YBL073W   | None  |                                                                                                                                                        |
| YDR290W   | None  |                                                                                                                                                        |
| YNL205C   | None  |                                                                                                                                                        |
| YJL182C   | None  |                                                                                                                                                        |
| YGR190C   | None  |                                                                                                                                                        |
| YKL037W   | None  |                                                                                                                                                        |
| YCL023C   | None  |                                                                                                                                                        |
| YMR194C-A | None  |                                                                                                                                                        |
| YLR122C   | None  |                                                                                                                                                        |
| YLR202C   | None  |                                                                                                                                                        |
| YJL120W   | None  |                                                                                                                                                        |
| YJL169W   | None  |                                                                                                                                                        |
| YPR142C   | None  |                                                                                                                                                        |
| YMR119W-A | None  |                                                                                                                                                        |
| YBR124W   | None  |                                                                                                                                                        |
| YDR199W   | None  |                                                                                                                                                        |
| YAR031W   | PRM9  | Pheromone-regulated protein with 3 predicted transmembrane segments and an FF sequence, a motif involved in COPII binding                              |
| YGR114C   | None  |                                                                                                                                                        |
| YML058C-A | None  |                                                                                                                                                        |
| YGR291C   | None  |                                                                                                                                                        |
| YMR324C   | None  |                                                                                                                                                        |
| YBR100W   | None  |                                                                                                                                                        |

|                |       |                                                                                                                                                                                                                                             |
|----------------|-------|---------------------------------------------------------------------------------------------------------------------------------------------------------------------------------------------------------------------------------------------|
| YEL059C-A      | SOM1  | Protein whose overexpression suppresses the imp1 mutation, may be required for the function of the Imp1p mitochondrial inner membrane peptidase and/or the protein sorting machinery                                                        |
| YKL118W        | None  |                                                                                                                                                                                                                                             |
| YGL072C        | None  |                                                                                                                                                                                                                                             |
| YBL096C        | None  |                                                                                                                                                                                                                                             |
| YDL232W        | OST4  | Subunit of the oligosaccharyltransferase complex of the ER lumen, which catalyzes asparagine-linked glycosylation of newly synthesized proteins; type I membrane protein of 36 residues that binds Stt3p and Ost3p together in a subcomplex |
| YDL152W        | None  |                                                                                                                                                                                                                                             |
| YHR079C-B      | None  |                                                                                                                                                                                                                                             |
| YBR099C        | None  |                                                                                                                                                                                                                                             |
| YCR001W        | None  |                                                                                                                                                                                                                                             |
| YLR428C        | None  |                                                                                                                                                                                                                                             |
| YGR290W        | None  |                                                                                                                                                                                                                                             |
| YDR445C        | None  |                                                                                                                                                                                                                                             |
| YPR151C        | SUE1  | Mitochondrial protein required for degradation of unstable forms of cytochrome c                                                                                                                                                            |
| YCR062W        | None  |                                                                                                                                                                                                                                             |
| YLR279W        | None  |                                                                                                                                                                                                                                             |
| YML100W-A      | None  |                                                                                                                                                                                                                                             |
| YNL235C        | None  |                                                                                                                                                                                                                                             |
| YJL211C        | None  |                                                                                                                                                                                                                                             |
| YER060W-A      | FCY22 | Putative purine-cytosine permease, very similar to Fcy2p but cannot substitute for its function                                                                                                                                             |
| YLR236C        | None  |                                                                                                                                                                                                                                             |
| YGL165C        | None  |                                                                                                                                                                                                                                             |
| YJL015C        | None  |                                                                                                                                                                                                                                             |
| YIL141W        | None  |                                                                                                                                                                                                                                             |
| YNL203C        | None  |                                                                                                                                                                                                                                             |
| YOR282W        | None  |                                                                                                                                                                                                                                             |
| YNL226W        | None  |                                                                                                                                                                                                                                             |
| YJL018W        | None  |                                                                                                                                                                                                                                             |
| YDR366C        | None  |                                                                                                                                                                                                                                             |
| YOR013W        | None  |                                                                                                                                                                                                                                             |
| YER091C-A      | None  |                                                                                                                                                                                                                                             |
| YLR281C        | None  |                                                                                                                                                                                                                                             |
| YHR145C        | None  |                                                                                                                                                                                                                                             |
| YML094W        | GIM5  | Prefoldin subunit 5; putative homolog of subunit 5 of bovine prefoldin, a chaperone comprised of six subunits; bovine prefoldin subunit 5 homolog (putative)                                                                                |
| YPR039W        | None  |                                                                                                                                                                                                                                             |
| YGR039W        | None  |                                                                                                                                                                                                                                             |
| (52) MODULE 59 |       |                                                                                                                                                                                                                                             |

|                              |       |                                                                                                                                                                                                                                                                                                                                                               |
|------------------------------|-------|---------------------------------------------------------------------------------------------------------------------------------------------------------------------------------------------------------------------------------------------------------------------------------------------------------------------------------------------------------------|
| <b>Genotype regulators</b>   |       |                                                                                                                                                                                                                                                                                                                                                               |
| M15_108577_154309            |       | PHM7(7,11) YOL085C YOL085W-A ADH1(4,8) YOL086W-A YOL087C MPD2(4,6) HAL9(15,4) MSH2(2,3) SPO21(3,6) YOL092W TRM10(5,4) RFC4(1,4) HMI1(5,1) COQ3(2,0) WRS1(1,3) YOL097W-A YOL098C YOL099C PKH2(7,6) IZH4(0,5) TPT1(2,3) ITR2(0,365) NDJ1(4,456) WSC3(6,2) YOL106W YOL107W INO4(0,1) ZEO1(1,3) SHR5(1,3) YOL111C MSB4(2,0) SKM1(9,2) YOL114C TRF4(4,4) MSN1(2,5) |
| <b>Module genes</b>          |       |                                                                                                                                                                                                                                                                                                                                                               |
| YOL113W                      | SKM1  | Serine/threonine protein kinase with similarity to Ste20p and Cla4p                                                                                                                                                                                                                                                                                           |
| YOL104C                      | NDJ1  | Meiosis-specific telomere protein, required for bouquet formation, effective homolog pairing, ordered cross-over distribution (interference), sister chromatid cohesion at meiotic telomeres, and segregation of small chromosomes                                                                                                                            |
| (53) MODULE 61               |       |                                                                                                                                                                                                                                                                                                                                                               |
| <b>Genotype regulators</b>   |       |                                                                                                                                                                                                                                                                                                                                                               |
| M15_108577_154309            |       | PHM7(7,11) YOL085C YOL085W-A ADH1(4,8) YOL086W-A YOL087C MPD2(4,6) HAL9(15,4) MSH2(2,3) SPO21(3,6) YOL092W TRM10(5,4) RFC4(1,4) HMI1(5,1) COQ3(2,0) WRS1(1,3) YOL097W-A YOL098C YOL099C PKH2(7,6) IZH4(0,5) TPT1(2,3) ITR2(0,365) NDJ1(4,456) WSC3(6,2) YOL106W YOL107W INO4(0,1) ZEO1(1,3) SHR5(1,3) YOL111C MSB4(2,0) SKM1(9,2) YOL114C TRF4(4,4) MSN1(2,5) |
| <b>Module genes</b>          |       |                                                                                                                                                                                                                                                                                                                                                               |
| YOL091W                      | SPO21 | Component of the meiotic outer plaque of the spindle pole body, involved in modifying the meiotic outer plaque that is required prior to prospore membrane formation                                                                                                                                                                                          |
| YLL028W                      | TPO1  | Proton-motive-force-dependent multidrug transporter of the major facilitator superfamily; able to transport eight different compounds, including polyamines, quinidine, cycloheximide, and nystatin; involved in excess spermidine detoxification                                                                                                             |
| (54) MODULE 62               |       |                                                                                                                                                                                                                                                                                                                                                               |
| <b>Expression regulators</b> |       |                                                                                                                                                                                                                                                                                                                                                               |
| YBR125C                      | PTC4  | Phosphatase type Two C; Type 2C protein phosphatase                                                                                                                                                                                                                                                                                                           |
| YBR140C                      | IRA1  | GTPase-activating protein that negatively regulates RAS by converting it from the GTP- to the GDP-bound inactive form, required for reducing cAMP levels under nutrient limiting conditions, mediates membrane association of adenylate cyclase                                                                                                               |
| <b>Module genes</b>          |       |                                                                                                                                                                                                                                                                                                                                                               |
| YOR304C-A                    | None  |                                                                                                                                                                                                                                                                                                                                                               |
| YER044C-A                    | MEI4  | Functions in early recombination; mRNA is meiosis-specific and has 88 bp intron at 5' end spliced independently of MER1.                                                                                                                                                                                                                                      |
| YOR041C                      | SRF5  | Dubious open reading frame, unlikely to encode a protein; not conserved in closely related Saccharomyces species; 85% of ORF overlaps the uncharacterized gene CUE5; deletion in <i>cyr1</i> mutant results in loss of stress resistance                                                                                                                      |
| YBR301W                      | DAN3  | Cell wall mannoprotein with similarity to Tir1p, Tir2p, Tir3p,                                                                                                                                                                                                                                                                                                |

|                              |       |                                                                                                                                                                                                                                                  |
|------------------------------|-------|--------------------------------------------------------------------------------------------------------------------------------------------------------------------------------------------------------------------------------------------------|
|                              |       | and Tir4p; expressed under anaerobic conditions, completely repressed during aerobic growth                                                                                                                                                      |
| YLL003W                      | SFI1  | None                                                                                                                                                                                                                                             |
| YML010W-A                    | None  |                                                                                                                                                                                                                                                  |
| (55) MODULE 63               |       |                                                                                                                                                                                                                                                  |
| <b>Expression regulators</b> |       |                                                                                                                                                                                                                                                  |
| YBR274W                      | CHK1  | checkpoint kinase 1; homolog of the <i>S. pombe</i> and mammalian Chk1 checkpoint kinases; Protein kinase Chk1                                                                                                                                   |
| YPL086C                      | ELP3  | Histone acetyltransferase subunit of the Elongator complex, which is a component of the RNA polymerase II holoenzyme; activity is directed specifically towards histones H3 and H4; disruption confers resistance to <i>K. lactis</i> zymotoxin  |
| YGR288W                      | MAL13 | MAL-activator protein, part of complex locus MAL1; nonfunctional in genomic reference strain S288C                                                                                                                                               |
| YGR123C                      | PPT1  | Protein serine/threonine phosphatase with similarity to human phosphatase PP5; present in both the nucleus and cytoplasm; expressed during logarithmic growth                                                                                    |
| YGL037C                      | PNC1  | NAD(+) salvage pathway gene; pyrazinamidase and nicotinamidase                                                                                                                                                                                   |
| YHR122W                      | None  |                                                                                                                                                                                                                                                  |
| YGL121C                      | GPG1  | Proposed gamma subunit of the heterotrimeric G protein that interacts with the receptor Grp1p; involved in regulation of pseudohyphal growth; requires Gpb1p or Gpb2p to interact with Gpa2p                                                     |
| <b>Module genes</b>          |       |                                                                                                                                                                                                                                                  |
| YBR162W-A                    | YSY6  | Protein that participates in secretory pathway                                                                                                                                                                                                   |
| YBR060C                      | ORC2  | Subunit of the origin recognition complex, which directs DNA replication by binding to replication origins and is also involved in transcriptional silencing; may be phosphorylated by Cdc28p                                                    |
| YBR075W                      | None  |                                                                                                                                                                                                                                                  |
| YBR163W                      | DEM1  | Protein of unknown function, shows similarity to RNA-processing protein Pta1p                                                                                                                                                                    |
| YBR112C                      | CYC8  | General transcriptional co-repressor, acts together with Tup1p; also acts as part of a transcriptional co-activator complex that recruits the SWI/SNF and SAGA complexes to promoters                                                            |
| YBR281C                      | None  |                                                                                                                                                                                                                                                  |
| YBL024W                      | NCL1  | Nuclear protein 1, similar to NOP2 and human proliferation associated nucleolar protein p120; Probable proliferating-cell nucleolar antigen (human p120)                                                                                         |
| YBL082C                      | RHK1  | Dolichol-P-Man dependent alpha(1-3) mannosyltransferase, involved in the synthesis of dolichol-linked oligosaccharide donor for N-linked glycosylation of proteins                                                                               |
| YBL032W                      | HEK2  | RNA binding protein with similarity to hnRNP-K that localizes to the cytoplasm and to subtelomeric DNA; required for the proper localization of ASH1 mRNA; involved in the regulation of telomere position effect and telomere length            |
| YBL008W                      | HIR1  | Non-essential transcriptional corepressor involved in the cell cycle-regulated transcription of histone H2A, H2B, H3 and H4 genes; contributes to nucleosome formation, heterochromatic gene silencing, and formation of functional kinetochores |

|         |        |                                                                                                                                                                                                                                                  |
|---------|--------|--------------------------------------------------------------------------------------------------------------------------------------------------------------------------------------------------------------------------------------------------|
| YOR116C | RPO31  | RNA polymerase III large subunit                                                                                                                                                                                                                 |
| YBR004C | FMP44  | The authentic, non-tagged protein was localized to the mitochondria                                                                                                                                                                              |
| YBR245C | ISW1   | Member of the imitation-switch (ISWI) class of ATP-dependent chromatin remodeling complexes; ATPase that forms a complex with Ioc2p and Ioc4p to regulate transcription elongation, and a complex with Ioc3p to repress transcription initiation |
| YBR261C | None   |                                                                                                                                                                                                                                                  |
| YBR069C | TAT1   | Amino acid transport protein for valine, leucine, isoleucine, and tyrosine                                                                                                                                                                       |
| YBL020W | RFT1   | Flippase, essential integral membrane protein that is required for translocation of Man5GlcNac2-PP-Dol from the cytoplasmic side to the luminal side of the ER membrane; mutation is suppressed by expression human p53 protein                  |
| YBL004W | UTP20  | Possible snoRNA-binding protein, based on computational analysis of large-scale protein-protein interaction data                                                                                                                                 |
| YBL085W | BOI1   | Protein implicated in polar growth, functionally redundant with Boi2p; interacts with bud-emergence protein Bem1p; contains an SH3 (src homology 3) domain and a PH (pleckstrin homology) domain                                                 |
| YBL077W | None   |                                                                                                                                                                                                                                                  |
| YBR065C | ECM2   | Pre-mRNA splicing factor, facilitates the cooperative formation of U2/U6 helix II in association with stem II in the spliceosome, function may be regulated by Slu7p                                                                             |
| YPR080W | TEF1   | functions in the binding reaction of aminoacyl-tRNA (AA-tRNA) to ribosomes; translational elongation factor EF-1 alpha                                                                                                                           |
| YBL034C | STU1   | Component of the mitotic spindle that binds to interpolar microtubules and plays an essential role in their ability to provide an outward force on the spindle poles                                                                             |
| YBL018C | POP8   | Subunit of both RNase MRP, which cleaves pre-rRNA, and nuclear RNase P, which cleaves tRNA precursors to generate mature 5' ends                                                                                                                 |
| YBL081W | None   |                                                                                                                                                                                                                                                  |
| YBR061C | TRM7   | 2'-O-ribose methyltransferase, methylates the 2'-O-ribose of nucleotides at positions 32 and 34 of the tRNA anticodon loop                                                                                                                       |
| YBR125C | PTC4   | Phosphatase type Two C; Type 2C protein phosphatase                                                                                                                                                                                              |
| YBR029C | CDS1   | CDP-diacylglycerol synthase, CTP-phosphatidic acid cytidyltransferase, CDP-diglyceride synthetase                                                                                                                                                |
| YBR252W | DUT1   | dUTPase, catalyzes the hydrolysis of dUTP to dUMP and PPi and thereby prevents the incorporation of uracil into DNA during replication                                                                                                           |
| YBR244W | GPX2   | Phospholipid hydroperoxide glutathione peroxidase induced by glucose starvation that protects cells from phospholipid hydroperoxides and nonphospholipid peroxides during oxidative stress                                                       |
| YBR084W | MIS1   | mitochondrial C1-tetrahydroflavate synthase                                                                                                                                                                                                      |
| YBL014C | RRN6   | involved in the transcription of 35S rRNA genes by RNA polymerase I; member of yeast Pol I core factor (CF) also composed of Rrn11p, Rrn7p and TATA-binding protein                                                                              |
| YBR017C | KAP104 | Transportin, cytosolic karyopherin beta 2 involved in delivery of                                                                                                                                                                                |

|           |        |                                                                                                                                                                                                                                                  |
|-----------|--------|--------------------------------------------------------------------------------------------------------------------------------------------------------------------------------------------------------------------------------------------------|
|           |        | heterogeneous nuclear ribonucleoproteins to the nucleoplasm, binds rg-nuclear localization signals on Nab2p and Hrp1p, plays a role in cell-cycle progression                                                                                    |
| YBR121C   | GRS1   | Cytoplasmic and mitochondrial glycyl-tRNA synthase that ligates glycine to the cognate anticodon bearing tRNA; transcription termination factor that may interact with the 3'-end of pre-mRNA to promote 3'-end formation                        |
| YBR266C   | None   |                                                                                                                                                                                                                                                  |
| YBL091C   | MAP2   | Methionine aminopeptidase, catalyzes the cotranslational removal of N-terminal methionine from nascent polypeptides; function is partially redundant with that of Map1p                                                                          |
| YBL067C   | UBP13  | Putative ubiquitin-specific protease                                                                                                                                                                                                             |
| YBL083C   | None   |                                                                                                                                                                                                                                                  |
| YBL041W   | PRE7   | 20S proteasome beta-type subunit                                                                                                                                                                                                                 |
| YBL009W   | None   |                                                                                                                                                                                                                                                  |
| YBR101C   | FES1   | Hsp70 (Ssa1p) nucleotide exchange factor, cytosolic homolog of Sls1p, which is the nucleotide exchange factor for BiP (Kar2p) in the endoplasmic reticulum                                                                                       |
| YBR166C   | TYR1   | Step of tyrosine biosynthesis pathway; Prephenate dehydrogenase (NADP+)                                                                                                                                                                          |
| YBR162C   | TOS1   | Target of SBF                                                                                                                                                                                                                                    |
| YBR154C   | RPB5   | RNA polymerase subunit, found in RNA polymerase complexes I, II, and III                                                                                                                                                                         |
| YBR200W   | BEM1   | Protein containing SH3-domains, involved in establishing cell polarity and morphogenesis; functions as a scaffold protein for complexes that include Cdc24p, Ste5p, Ste20p, and Rsr1p                                                            |
| YNL273W   | TOF1   | Protein that interacts with topoisomerase I                                                                                                                                                                                                      |
| YBR089W   | None   |                                                                                                                                                                                                                                                  |
| YBL035C   | POL12  | Subunit of the DNA polymerase alpha-primase complex, required for the initiation of DNA replication during mitotic DNA synthesis and premeiotic DNA synthesis                                                                                    |
| YBL051C   | PIN4   | Protein involved in G2/M phase progression and response to DNA damage, interacts with Rad53p; contains an RNA recognition motif, a nuclear localization signal, and several SQ/TQ cluster domains; hyperphosphorylated in response to DNA damage |
| YBR084C-A | RPL19A | Protein component of the large (60S) ribosomal subunit, nearly identical to Rpl19Bp and has similarity to rat L19 ribosomal protein; rpl19a and rpl19b single null mutations result in slow growth, while the double null mutation is lethal     |
| YGL014W   | PUF4   | member of the PUF protein family; YGL014W                                                                                                                                                                                                        |
| YBL062W   | None   |                                                                                                                                                                                                                                                  |
| YBR034C   | HMT1   | Nuclear SAM-dependent mono- and asymmetric arginine dimethylating methyltransferase that modifies hnRNPs, including Npl3p and Hrp1p, thus facilitating nuclear export of these proteins; required for viability of npl3 mutants                  |
| YBR153W   | RIB7   | Diaminohydroxyphosphoribosylaminopyrimidine deaminase; catalyzes the second step of the riboflavin biosynthesis pathway                                                                                                                          |
| YBR233W   | PBP2   | RNA binding protein with similarity to mammalian heterogeneous nuclear RNP K protein, involved in the                                                                                                                                            |

|         |        |                                                                                                                                                                                                                                              |
|---------|--------|----------------------------------------------------------------------------------------------------------------------------------------------------------------------------------------------------------------------------------------------|
|         |        | regulation of telomere position effect and telomere length                                                                                                                                                                                   |
| YBR073W | RDH54  | genetic interaction with DMC1; Putative helicase similar to RAD54                                                                                                                                                                            |
| YBR283C | SSH1   | Sec61p homolog involved in co-translational pathway of protein transport                                                                                                                                                                     |
| YBR195C | MSI1   | Subunit of chromatin assembly factor I (CAF-I), regulates the RAS/cAMP pathway via sequestration of Npr1p kinase; localizes to the nucleus and cytoplasm; homologous to human retinoblastoma binding proteins RbAp48 and RbAp46              |
| YBL076C | ILS1   | Cytoplasmic isoleucine-tRNA synthetase, target of the G1-specific inhibitor reveromycin A                                                                                                                                                    |
| YBR079C | RPG1   | Subunit of the core complex of translation initiation factor 3(eIF3), essential for translation; part of a subcomplex (Prt1p-Rpg1p-Nip1p) that stimulates binding of mRNA and tRNA(i)Met to ribosomes                                        |
| YBL079W | NUP170 | Abundant subunit of the nuclear pore complex (NPC), required for proper localization of specific nucleoporins within the NPC, involved in nuclear envelope permeability and in chromosome segregation, has similarity to Nup157p             |
| YBR243C | ALG7   | UDP-N-acetyl-glucosamine-1-P transferase, transfers Glc-Nac-P from UDP-GlcNac to Dol-P in the ER in the first step of the dolichol pathway of protein asparagine-linked glycosylation; inhibited by tunicamycin                              |
| YBR219C | None   |                                                                                                                                                                                                                                              |
| YBR194W | SOY1   | Synthetic with Old Yellow Enzyme                                                                                                                                                                                                             |
| YBR098W | MMS4   | endonuclease                                                                                                                                                                                                                                 |
| YBL052C | SAS3   | Protein involved in silencing at HMR                                                                                                                                                                                                         |
| YBL036C | None   |                                                                                                                                                                                                                                              |
| YBR063C | None   |                                                                                                                                                                                                                                              |
| YBR021W | FUR4   | Uracil permease, localized to the plasma membrane; expression is tightly regulated by uracil levels and environmental cues                                                                                                                   |
| YBR143C | SUP45  | Translation release factor involved in translation termination; mutant form acts as a recessive omnipotent suppressor                                                                                                                        |
| YBR078W | ECM33  | GPI-anchored protein of unknown function, has a possible role in apical bud growth; GPI-anchoring on the plasma membrane crucial to function; similar to Sps2p and Pst1p                                                                     |
| YBR094W | None   |                                                                                                                                                                                                                                              |
| YBR242W | None   |                                                                                                                                                                                                                                              |
| YBR074W | None   |                                                                                                                                                                                                                                              |
| YBL027W | RPL19B | Protein component of the large (60S) ribosomal subunit, nearly identical to Rpl19Bp and has similarity to rat L19 ribosomal protein; rpl19a and rpl19b single null mutations result in slow growth, while the double null mutation is lethal |
| YBR023C | CHS3   | Chitin synthase III, catalyzes the transfer of N-acetylglucosamine (GlcNAc) to chitin; required for synthesis of the majority of cell wall chitin, the chitin ring during bud emergence, and spore wall chitosan                             |
| YBR142W | MAK5   | Essential nucleolar protein, putative DEAD-box RNA helicase required for maintenance of M1 dsRNA virus; involved in biogenesis of large (60S) ribosomal subunits                                                                             |



|                              |       |                                                                                                                                                                                                                                               |
|------------------------------|-------|-----------------------------------------------------------------------------------------------------------------------------------------------------------------------------------------------------------------------------------------------|
| YBL031W                      | SHE1  | Cytoskeletal protein of unknown function; overexpression causes growth arrest                                                                                                                                                                 |
| YBR172C                      | SMY2  | partial suppressor of myo2-66; Kinesin-related protein suppressing myosin defects (MYO2)                                                                                                                                                      |
| YBR106W                      | PHO88 | Probable membrane protein, involved in phosphate transport; pho88 pho86 double null mutant exhibits enhanced synthesis of repressible acid phosphatase at high inorganic phosphate concentrations                                             |
| YBR187W                      | None  |                                                                                                                                                                                                                                               |
| YBL061C                      | SKT5  | Activator of Chs3p (chitin synthase III), recruits Chs3p to the bud neck via interaction with Bni4p; has similarity to Shc1p, which activates Chs3p during sporulation                                                                        |
| YBL068W                      | PRS4  | 5-phospho-ribosyl-1(alpha)-pyrophosphate synthetase, involved in nucleotide, histidine, and tryptophan biosynthesis; one of a five related enzymes, which are active as heteromultimeric complexes                                            |
| YBR271W                      | None  |                                                                                                                                                                                                                                               |
| YBR159W                      | None  |                                                                                                                                                                                                                                               |
| YBR175W                      | SWD3  | Subunit of the COMPASS complex, which methylates histone H3 on lysine 4 and is required in transcriptional silencing near telomeres                                                                                                           |
| YBR087W                      | RFC5  | Subunit of heteropentameric Replication factor C (RF-C), which is a DNA binding protein and ATPase that acts as a clamp loader of the proliferating cell nuclear antigen (PCNA) processivity factor for DNA polymerases delta and epsilon     |
| YBR263W                      | SHM1  | Serine hydroxymethyltransferase, mitochondrial                                                                                                                                                                                                |
| YPL242C                      | IQG1  | Essential protein required for determination of budding pattern, promotes localization of axial markers Bud4p and Cdc12p and functionally interacts with Sec3p, localizes to the contractile ring during anaphase, member of the IQGAP family |
| (56) MODULE 64               |       |                                                                                                                                                                                                                                               |
| <b>Expression regulators</b> |       |                                                                                                                                                                                                                                               |
| YDL064W                      | UBC9  | SUMO-conjugating enzyme involved in the Smt3p conjugation pathway; nuclear protein required for S- and M-phase cyclin degradation and mitotic control; involved in proteolysis mediated by the anaphase-promoting complex cyclosome (APCC)    |
| YGR123C                      | PPT1  | Protein serine/threonine phosphatase with similarity to human phosphatase PP5; present in both the nucleus and cytoplasm; expressed during logarithmic growth                                                                                 |
| YNL030W                      | HHF2  | One of two identical histone H4 proteins (see also HHF1); core histone required for chromatin assembly and chromosome function; contributes to telomeric silencing; N-terminal domain involved in maintaining genomic integrity               |
| YGR123C                      | PPT1  | Protein serine/threonine phosphatase with similarity to human phosphatase PP5; present in both the nucleus and cytoplasm; expressed during logarithmic growth                                                                                 |
| YPL002C                      | SNF8  | appears to be functionally related to SNF7; involved in glucose derepression                                                                                                                                                                  |
| YGR123C                      | PPT1  | Protein serine/threonine phosphatase with similarity to human                                                                                                                                                                                 |

|                     |        |                                                                                                                                                                                                                                    |
|---------------------|--------|------------------------------------------------------------------------------------------------------------------------------------------------------------------------------------------------------------------------------------|
|                     |        | phosphatase PP5; present in both the nucleus and cytoplasm; expressed during logarithmic growth                                                                                                                                    |
| YGR188C             | BUB1   | checkpoint gene involved in permitting entry into mitosis depending upon the assembly state of microtubules; Serine/threonine protein kinase required for cell cycle arrest in response to loss of microtubule function            |
| <b>Module genes</b> |        |                                                                                                                                                                                                                                    |
| YCL050C             | APA1   | Diadenosine 5',5''-P1,P4-tetraphosphate phosphorylase I (AP4A phosphorylase), involved in catabolism of bis(5'-nucleosidyl) tetraphosphates; has similarity to Apa2p                                                               |
| YER056C-A           | RPL34A | Protein component of the large (60S) ribosomal subunit, nearly identical to Rpl34Bp and has similarity to rat L34 ribosomal protein                                                                                                |
| YOR210W             | RPB10  | RNA polymerase subunit, found in RNA polymerase complexes I, II, and III                                                                                                                                                           |
| YIL018W             | RPL2B  | Protein component of the large (60S) ribosomal subunit, identical to Rpl2Ap and has similarity to E. coli L2 and rat L8 ribosomal proteins; expression is upregulated at low temperatures                                          |
| YDL082W             | RPL13A | Protein component of the large (60S) ribosomal subunit, nearly identical to Rpl13Bp; not essential for viability; has similarity to rat L13 ribosomal protein                                                                      |
| YPR043W             | RPL43A | Protein component of the large (60S) ribosomal subunit, identical to Rpl43Bp and has similarity to rat L37a ribosomal protein; null mutation confers a dominant lethal phenotype                                                   |
| YLR029C             | RPL15A | Protein component of the large (60S) ribosomal subunit, nearly identical to Rpl15Bp and has similarity to rat L15 ribosomal protein; binds to 5.8 S rRNA                                                                           |
| YNL067W             | RPL9B  | Protein component of the large (60S) ribosomal subunit, nearly identical to Rpl9Ap and has similarity to E. coli L6 and rat L9 ribosomal proteins                                                                                  |
| YKR059W             | TIF1   | translation initiation factor eIF4A                                                                                                                                                                                                |
| YGR211W             | ZPR1   | Essential protein with two zinc fingers, present in the nucleus of growing cells but relocates to the cytoplasm in starved cells via a process mediated by Cpr1p; binds to translation elongation factor eEF-1 (Tef1p)             |
| YGR085C             | RPL11B | Protein component of the large (60S) ribosomal subunit, nearly identical to Rpl11Ap; involved in ribosomal assembly; depletion causes degradation of proteins and RNA of the 60S subunit; has similarity to E. coli L5 and rat L11 |
| YHR021C             | RPS27B | Protein component of the small (40S) ribosomal subunit; nearly identical to Rps27Ap and has similarity to rat S27 ribosomal protein                                                                                                |
| YAL035W             | FUN12  | GTPase, required for general translation initiation by promoting Met-tRNA <sup>iMet</sup> binding to ribosomes and ribosomal subunit joining; homolog of bacterial IF2                                                             |
| YPL142C             | None   |                                                                                                                                                                                                                                    |
| YMR142C             | RPL13B | Protein component of the large (60S) ribosomal subunit, nearly identical to Rpl13Ap; not essential for viability; has similarity to rat L13 ribosomal protein                                                                      |
| YLR198C             | None   |                                                                                                                                                                                                                                    |

|         |        |                                                                                                                                                                                                                                                                                |
|---------|--------|--------------------------------------------------------------------------------------------------------------------------------------------------------------------------------------------------------------------------------------------------------------------------------|
| YLR340W | RPP0   | Conserved ribosomal protein P0 similar to rat P0, human P0, and E. coli L10e; shown to be phosphorylated on serine 302                                                                                                                                                         |
| YDR012W | RPL4B  | Protein component of the large (60S) ribosomal subunit, nearly identical to Rpl4Ap and has similarity to E. coli L4 and rat L4 ribosomal proteins                                                                                                                              |
| YDR447C | RPS17B | Ribosomal protein 51 (rp51) of the small (40s) subunit; nearly identical to Rps17Ap and has similarity to rat S17 ribosomal protein                                                                                                                                            |
| YOR224C | RPB8   | RNA polymerase subunit, found in RNA polymerase complexes I, II, and III                                                                                                                                                                                                       |
| YOR312C | RPL20B | Protein component of the large (60S) ribosomal subunit, nearly identical to Rpl20Ap and has similarity to rat L18a ribosomal protein                                                                                                                                           |
| YDL184C | RPL41A | Ribosomal protein L47 of the large (60S) ribosomal subunit, identical to Rpl41Bp and has similarity to rat L41 ribosomal protein; comprised of only 25 amino acids; rpl41a rpl41b double null mutant is viable                                                                 |
| YOR369C | RPS12  | Protein component of the small (40S) ribosomal subunit; has similarity to rat ribosomal protein S12                                                                                                                                                                            |
| YOL121C | RPS19A | Protein component of the small (40S) ribosomal subunit; nearly identical to Rps19Bp and has similarity to rat S19 ribosomal protein                                                                                                                                            |
| YNL265C | IST1   | Putative translation initiation factor, as suggested by computational analysis of large-scale protein-protein interaction data                                                                                                                                                 |
| YLR048W | RPS0B  | Protein component of the small (40S) ribosomal subunit, nearly identical to Rps0Ap; required for maturation of 18S rRNA along with Rps0Ap; deletion of either RPS0 gene reduces growth rate, deletion of both genes is lethal                                                  |
| YPL081W | RPS9A  | Protein component of the small (40S) ribosomal subunit; nearly identical to Rps9Ap and has similarity to E. coli S4 and rat S9 ribosomal proteins                                                                                                                              |
| YMR217W | GUA1   | GMP synthase, an enzyme that catalyzes the second step in the biosynthesis of GMP from inosine 5'-phosphate (IMP); transcription is not subject to regulation by guanine but is negatively regulated by nutrient starvation                                                    |
| YHL001W | RPL14B | Protein component of the large (60S) ribosomal subunit, nearly identical to Rpl14Ap and has similarity to rat L14 ribosomal protein                                                                                                                                            |
| YIL052C | RPL34B | Protein component of the large (60S) ribosomal subunit, nearly identical to Rpl34Ap and has similarity to rat L34 ribosomal protein                                                                                                                                            |
| YER074W | RPS24A | Protein component of the small (40S) ribosomal subunit; identical to Rps24Bp and has similarity to rat S24 ribosomal protein                                                                                                                                                   |
| YER146W | LSM5   | Component of small nuclear ribonucleoprotein complexes involved in RNA processing, splicing, and decay                                                                                                                                                                         |
| YDL130W | RPP1B  | Ribosomal protein P1 beta, a component of the ribosomal stalk, which is involved in the interaction between translational elongation factors and the ribosome; accumulation of P1 in the cytoplasm is regulated by phosphorylation and interaction with the P2 stalk component |

|         |        |                                                                                                                                                                                                                                      |
|---------|--------|--------------------------------------------------------------------------------------------------------------------------------------------------------------------------------------------------------------------------------------|
| YDL228C | None   |                                                                                                                                                                                                                                      |
| YOR277C | None   |                                                                                                                                                                                                                                      |
| YNL149C | None   |                                                                                                                                                                                                                                      |
| YGR109C | CLB6   | role in DNA replication during S phase; B-type cyclin                                                                                                                                                                                |
| YBR181C | RPS6B  | Protein component of the small (40S) ribosomal subunit; identical to Rps6Ap and has similarity to rat S6 ribosomal protein                                                                                                           |
| YAL003W | EFB1   | Translation elongation factor 1 beta; stimulates nucleotide exchange to regenerate EF-1 alpha-GTP for the next elongation cycle; part of the EF-1 complex, which facilitates binding of aminoacyl-tRNA to the ribosomal A site       |
| YLR406C | RPL31B | Protein component of the large (60S) ribosomal subunit, nearly identical to Rpl31Ap and has similarity to rat L31 ribosomal protein; associates with the karyopherin Sxm1p                                                           |
| YGL102C | None   |                                                                                                                                                                                                                                      |
| YLR197W | SIK1   | Component of the small (ribosomal) subunit (SSU) processosome that contains U3 snoRNA; similar to microtubule binding proteins                                                                                                       |
| YPL263C | KEL3   | Cytoplasmic protein of unknown function                                                                                                                                                                                              |
| YKL181W | PRS1   | 5-phospho-ribosyl-1(alpha)-pyrophosphate synthetase, involved in nucleotide, histidine, and tryptophan biosynthesis; one of a five related enzymes, which are active as heteromultimeric complexes                                   |
| YPL198W | RPL7B  | Protein component of the large (60S) ribosomal subunit, nearly identical to Rpl7Ap and has similarity to E. coli L30 and rat L7 ribosomal proteins; contains a conserved C-terminal Nucleic acid Binding Domain (NDB2)               |
| YML022W | APT1   | Adenine phosphoribosyltransferase, catalyzes the formation of AMP from adenine and 5-phosphoribosylpyrophosphate; involved in the salvage pathway of purine nucleotide biosynthesis                                                  |
| YML056C | IMD4   | Inosine monophosphate dehydrogenase, catalyzes the first step of GMP biosynthesis, member of a four-gene family in <i>S. cerevisiae</i> , constitutively expressed                                                                   |
| YDR382W | RPP2B  | Ribosomal protein P2 beta, a component of the ribosomal stalk, which is involved in the interaction between translational elongation factors and the ribosome; regulates the accumulation of P1 (Rpp1Ap and Rpp1Bp) in the cytoplasm |
| YOR169C | None   |                                                                                                                                                                                                                                      |
| YDL191W | RPL35A | Protein component of the large (60S) ribosomal subunit, identical to Rpl35Bp and has similarity to rat L35 ribosomal protein                                                                                                         |
| YBR031W | RPL4A  | N-terminally acetylated protein component of the large (60S) ribosomal subunit, nearly identical to Rpl4Bp and has similarity to E. coli L4 and rat L4 ribosomal proteins                                                            |
| YGR160W | None   |                                                                                                                                                                                                                                      |
| YLR249W | YEF3   | stimulates the binding of aminoacyl-tRNA (AA-tRNA) to ribosomes by releasing EF-1 alpha from the ribosomal complex; contains two ABC cassettes, and binds and hydrolyses ATP; EF-3 (translational elongation factor 3)               |

|         |        |                                                                                                                                                                                                                                                |
|---------|--------|------------------------------------------------------------------------------------------------------------------------------------------------------------------------------------------------------------------------------------------------|
| YLR185W | RPL37A | Protein component of the large (60S) ribosomal subunit, has similarity to Rpl37Bp and to rat L37 ribosomal protein                                                                                                                             |
| YKL081W | TEF4   | Translation elongation factor EF-1gamma                                                                                                                                                                                                        |
| YDR025W | RPS11A | Protein component of the small (40S) ribosomal subunit; identical to Rps11Bp and has similarity to E. coli S17 and rat S11 ribosomal proteins                                                                                                  |
| YHL011C | PRS3   | 5-phospho-ribosyl-1(alpha)-pyrophosphate synthetase, involved in nucleotide, histidine, and tryptophan biosynthesis; one of a five related enzymes, which are active as heteromultimeric complexes                                             |
| YGL147C | RPL9A  | Protein component of the large (60S) ribosomal subunit, nearly identical to Rpl9Bp and has similarity to E. coli L6 and rat L9 ribosomal proteins                                                                                              |
| YDR091C | RLI1   | Protein with strong similarity to human RNase L Inhibitor (RLI), required for vegetative growth and early sporulation; putative member of nontransporter group of ATP-binding cassette (ABC) superfamily                                       |
| YMR194W | RPL36A | N-terminally acetylated protein component of the large (60S) ribosomal subunit, nearly identical to Rpl36Ap and has similarity to rat L36 ribosomal protein; binds to 5.8 S rRNA                                                               |
| YJR124C | None   |                                                                                                                                                                                                                                                |
| YDR418W | RPL12B | Protein component of the large (60S) ribosomal subunit, nearly identical to Rpl12Ap; rpl12a rpl12b double mutant exhibits slow growth and slow translation; has similarity to E. coli L11 and rat L12 ribosomal proteins                       |
| YDR450W | RPS18A | Protein component of the small (40S) ribosomal subunit; nearly identical to Rps18Bp and has similarity to E. coli S13 and rat S18 ribosomal proteins                                                                                           |
| YER042W | MXR1   | peptide Methionine sulfoXide Reductase 1; peptide methionine sulfoxide reductase                                                                                                                                                               |
| YOR309C | None   |                                                                                                                                                                                                                                                |
| YNL301C | RPL18B | Protein component of the large (60S) ribosomal subunit, identical to Rpl18Ap and has similarity to rat L18 ribosomal protein                                                                                                                   |
| YIL069C | RPS24B | Protein component of the small (40S) ribosomal subunit; identical to Rps24Ap and has similarity to rat S24 ribosomal protein                                                                                                                   |
| YOR276W | CAF20  | binds to eIF-4E, the mRNA cap-binding protein, and represses cap-dependent translation initiation by interfering with the interaction of eIF4E and eIF4G; mRNA cap-binding protein (eIF4F) 20K subunit                                         |
| YPR132W | RPS23B | Ribosomal protein 28 (rp28) of the small (40S) ribosomal subunit, required for translational accuracy; nearly identical to Rps23Ap and similar to E. coli S12 and rat S23 ribosomal proteins; deletion of both RPS23A and RPS23B is lethal     |
| YLR062C | BUD28  | Dubious open reading frame, unlikely to encode a protein; not conserved in closely related Saccharomyces species; 98% of ORF overlaps the verified gene RPL22A; diploid mutant displays a weak budding pattern phenotype in a systematic assay |
| YJL190C | RPS22A | Protein component of the small (40S) ribosomal subunit; nearly identical to Rps22Bp and has similarity to E. coli S8 and rat                                                                                                                   |

|         |        |                                                                                                                                                                                                                           |
|---------|--------|---------------------------------------------------------------------------------------------------------------------------------------------------------------------------------------------------------------------------|
|         |        | S15a ribosomal proteins                                                                                                                                                                                                   |
| YJL189W | RPL39  | Protein component of the large (60S) ribosomal subunit, has similarity to rat L39 ribosomal protein; required for ribosome biogenesis; exhibits genetic interactions with SIS1 and PAB1                                   |
| YBL087C | RPL23A | Protein component of the large (60S) ribosomal subunit, identical to Rpl23Bp and has similarity to E. coli L14 and rat L23 ribosomal proteins                                                                             |
| YER102W | RPS8B  | Protein component of the small (40S) ribosomal subunit; identical to Rps8Bp and has similarity to rat S8 ribosomal protein                                                                                                |
| YJR063W | RPA12  | RNA polymerase I subunit A12.2; contains two zinc binding domains, and the N terminal domain is responsible for anchoring to the RNA pol I complex                                                                        |
| YML063W | RPS1B  | Ribosomal protein 10 (rp10) of the small (40S) subunit; nearly identical to Rps1Ap and has similarity to rat S3a ribosomal protein                                                                                        |
| YBR025C | None   |                                                                                                                                                                                                                           |
| YOR096W | RPS7A  | Protein component of the small (40S) ribosomal subunit, nearly identical to Rps7Bp; interacts with Kti11p; deletion causes hypersensitivity to zymocin; has similarity to rat S7 and Xenopus S8 ribosomal proteins        |
| YOR168W | GLN4   | Glutamine tRNA synthetase, monomeric class I tRNA synthetase that catalyzes the specific glutamylation of tRNA(Glu); N-terminal domain proposed to be involved in enzyme-tRNA interactions                                |
| YOR272W | YTM1   | microtubule-associated protein                                                                                                                                                                                            |
| YJL138C | TIF2   | translation initiation factor eIF4A                                                                                                                                                                                       |
| YBR048W | RPS11B | Protein component of the small (40S) ribosomal subunit; identical to Rps11Ap and has similarity to E. coli S17 and rat S11 ribosomal proteins                                                                             |
| YJL177W | RPL17B | Protein component of the large (60S) ribosomal subunit, nearly identical to Rpl17Ap and has similarity to E. coli L22 and rat L17 ribosomal proteins                                                                      |
| YGR265W | None   |                                                                                                                                                                                                                           |
| YER036C | ARB1   | ATPase of the ATP-binding cassette (ABC) family involved in ribosome biogenesis, has similarity to Gcn20p                                                                                                                 |
| YJR123W | RPS5   | Protein component of the small (40S) ribosomal subunit, the least basic of the non-acidic ribosomal proteins; phosphorylated in vivo; essential for viability; has similarity to E. coli S7 and rat S5 ribosomal proteins |
| YIL133C | RPL16A | N-terminally acetylated protein component of the large (60S) ribosomal subunit, binds to 5.8 S rRNA; has similarity to Rpl16Bp, E. coli L13 and rat L13a ribosomal proteins; transcriptionally regulated by Rap1p         |
| YDR395W | SXM1   | Nuclear protein; has similarity to Cse1p homologs including Nmd5p, Cse1p, Lph2p, and the human cellular apoptosis susceptibility protein, CAS1; also has similarity to the karyopherin Kap95p                             |
| YDL051W | LHP1   | RNA binding protein required for maturation of tRNA and snRNA precursors; acts as a molecular chaperone for RNAs transcribed by polymerase III; homologous to human La (SS-B)                                             |

|           |        |                                                                                                                                                                                                                                                                                 |
|-----------|--------|---------------------------------------------------------------------------------------------------------------------------------------------------------------------------------------------------------------------------------------------------------------------------------|
|           |        | autoantigen                                                                                                                                                                                                                                                                     |
| YDL157C   | None   |                                                                                                                                                                                                                                                                                 |
| YPL249C-A | RPL36B | Protein component of the large (60S) ribosomal subunit, nearly identical to Rpl36Bp and has similarity to rat L36 ribosomal protein; binds to 5.8 S rRNA                                                                                                                        |
| YKR094C   | RPL40B | Fusion protein, identical to Rpl40Ap, that is cleaved to yield ubiquitin and a ribosomal protein of the large (60S) ribosomal subunit with similarity to rat L40; ubiquitin may facilitate assembly of the ribosomal protein into ribosomes                                     |
| YIL148W   | RPL40A | Fusion protein, identical to Rpl40Bp, that is cleaved to yield ubiquitin and a ribosomal protein of the large (60S) ribosomal subunit with similarity to rat L40; ubiquitin may facilitate assembly of the ribosomal protein into ribosomes                                     |
| YLR061W   | RPL22A | Protein component of the large (60S) ribosomal subunit, has similarity to Rpl22Bp and to rat L22 ribosomal protein                                                                                                                                                              |
| YGL031C   | RPL24A | Ribosomal protein L30 of the large (60S) ribosomal subunit, nearly identical to Rpl24Bp and has similarity to rat L24 ribosomal protein; not essential for translation but may be required for normal translation rate                                                          |
| YBR189W   | RPS9B  | Protein component of the small (40S) ribosomal subunit; nearly identical to Rps9Bp and has similarity to E. coli S4 and rat S9 ribosomal proteins                                                                                                                               |
| YBL039C   | URA7   | CTP synthase, catalyzes the ATP-dependent transfer of amide nitrogen from glutamine to UTP to form CTP in last step of pyrimidine biosynthesis, very similar to URA8p but appears to be responsible for the majority of CTP synthesis                                           |
| YMR230W   | RPS10B | Protein component of the small (40S) ribosomal subunit; nearly identical to Rps10Ap and has similarity to rat ribosomal protein S10                                                                                                                                             |
| YJR145C   | RPS4A  | Protein component of the small (40S) ribosomal subunit; mutation affects 20S pre-rRNA processing; identical to Rps4Bp and has similarity to rat S4 ribosomal protein                                                                                                            |
| YML073C   | RPL6A  | N-terminally acetylated protein component of the large (60S) ribosomal subunit, has similarity to Rpl6Bp and to rat L6 ribosomal protein; binds to 5.8S rRNA                                                                                                                    |
| YDR471W   | RPL27B | Protein component of the large (60S) ribosomal subunit, nearly identical to Rpl27Ap and has similarity to rat L27 ribosomal protein                                                                                                                                             |
| YDL081C   | RPP1A  | Ribosomal protein P1 alpha, a component of the ribosomal stalk, which is involved in the interaction between translational elongation factors and the ribosome; accumulation of P1 in the cytoplasm is regulated by phosphorylation and interaction with the P2 stalk component |
| YLR017W   | MEU1   | Methylthioadenosine phosphorylase (MTAP), catalyzes the initial step in the methionine salvage pathway; affects polyamine biosynthesis through regulation of ornithine decarboxylase (Spe1p) activity; regulates ADH2 gene expression                                           |
| YOL139C   | CDC33  | Cytoplasmic mRNA cap binding protein; the eIF4E-cap complex is responsible for mediating cap-dependent mRNA translation via interactions with the translation initiation factor eIF4G (Tif4631p or Tif4632p)                                                                    |

|         |        |                                                                                                                                                                                                                                    |
|---------|--------|------------------------------------------------------------------------------------------------------------------------------------------------------------------------------------------------------------------------------------|
| YHR203C | RPS4B  | Protein component of the small (40S) ribosomal subunit; identical to Rps4Bp and has similarity to rat S4 ribosomal protein                                                                                                         |
| YLR186W | EMG1   | Protein required for the maturation of the 18S rRNA and for 40S ribosome production; associated with spindle/microtubules; nuclear localization depends on physical interaction with Nop14p; may bind snoRNAs                      |
| YMR260C | TIF11  | Translation initiation factor eIF1A                                                                                                                                                                                                |
| YGL076C | RPL7A  | Protein component of the large (60S) ribosomal subunit, nearly identical to Rpl7Bp and has similarity to E. coli L30 and rat L7 ribosomal proteins; contains a conserved C-terminal Nucleic acid Binding Domain (NDB2)             |
| YDR500C | RPL37B | Protein component of the large (60S) ribosomal subunit, has similarity to Rpl37Ap and to rat L37 ribosomal protein                                                                                                                 |
| YOR021C | None   |                                                                                                                                                                                                                                    |
| YER131W | RPS26B | Protein component of the small (40S) ribosomal subunit; nearly identical to Rps26Ap and has similarity to rat S26 ribosomal protein                                                                                                |
| YDL061C | RPS29B | Protein component of the small (40S) ribosomal subunit; nearly identical to Rps29Ap and has similarity to rat S29 and E. coli S14 ribosomal proteins                                                                               |
| YPR102C | RPL11A | Protein component of the large (60S) ribosomal subunit, nearly identical to Rpl11Bp; involved in ribosomal assembly; depletion causes degradation of proteins and RNA of the 60S subunit; has similarity to E. coli L5 and rat L11 |
| YOR182C | RPS30B | Protein component of the small (40S) ribosomal subunit; nearly identical to Rps30Ap and has similarity to rat S30 ribosomal protein                                                                                                |
| YNL302C | RPS19B | Protein component of the small (40S) ribosomal subunit; nearly identical to Rps19Ap and has similarity to rat S19 ribosomal protein                                                                                                |
| YEL054C | RPL12A | Protein component of the large (60S) ribosomal subunit, nearly identical to Rpl12Bp; rpl12a rpl12b double mutant exhibits slow growth and slow translation; has similarity to E. coli L11 and rat L12 ribosomal proteins           |
| YOR293W | RPS10A | Protein component of the small (40S) ribosomal subunit; nearly identical to Rps10Bp and has similarity to rat ribosomal protein S10                                                                                                |
| YGR159C | NSR1   | Nucleolar protein that binds nuclear localization sequences, required for pre-rRNA processing and ribosome biogenesis                                                                                                              |
| YGL030W | RPL30  | Protein component of the large (60S) ribosomal subunit, has similarity to rat L30 ribosomal protein; involved in pre-rRNA processing in the nucleolus; autoregulates splicing of its transcript                                    |
| YPL079W | RPL21B | Protein component of the large (60S) ribosomal subunit, nearly identical to Rpl21Ap and has similarity to rat L21 ribosomal protein                                                                                                |
| YHL015W | RPS20  | Protein component of the small (40S) ribosomal subunit; overproduction suppresses mutations affecting RNA polymerase III-dependent transcription; has similarity to E. coli S10 and rat S20 ribosomal proteins                     |



|           |        |                                                                                                                                                                                                                                               |
|-----------|--------|-----------------------------------------------------------------------------------------------------------------------------------------------------------------------------------------------------------------------------------------------|
| YOR234C   | RPL33B | Ribosomal protein L37 of the large (60S) ribosomal subunit, nearly identical to Rpl33Ap and has similarity to rat L35a; rpl33b null mutant exhibits normal growth while rpl33a rpl33b double null mutant is inviable                          |
| YDL136W   | RPL35B | Protein component of the large (60S) ribosomal subunit, identical to Rpl35Ap and has similarity to rat L35 ribosomal protein                                                                                                                  |
| YFR032C-A | RPL29  | Protein component of the large (60S) ribosomal subunit, has similarity to rat L29 ribosomal protein; not essential for translation, but required for proper joining of the large and small ribosomal subunits and for normal translation rate |
| YMR116C   | ASC1   | WD repeat protein (G-beta like protein) that interacts with the translational machinery; G-beta like protein                                                                                                                                  |
| YJL098W   | SAP185 | Protein that forms a complex with the Sit4p protein phosphatase and is required for its function; member of a family of similar proteins including Sap4p, Sap155p, and Sap190p                                                                |
| YDR002W   | YRB1   | Yeast Ran Binder #1; suppressor of FUS1; homolog of mouse HTF9a and human RanBP1; nuclear GTPase-activating protein for Ran                                                                                                                   |
| YPL197C   | None   |                                                                                                                                                                                                                                               |
| YDR429C   | TIF35  | Subunit of the core complex of translation initiation factor 3(eIF3), which is essential for translation                                                                                                                                      |
| YGL189C   | RPS26A | Protein component of the small (40S) ribosomal subunit; nearly identical to Rps26Bp and has similarity to rat S26 ribosomal protein                                                                                                           |
| YOR214C   | None   |                                                                                                                                                                                                                                               |
| YNL141W   | AAH1   | Adenine deaminase (adenine aminohydrolase), involved in purine salvage and nitrogen catabolism                                                                                                                                                |
| YNL255C   | GIS2   | Putative zinc finger protein with similarity to human CNBP, proposed to be involved in the RAS/cAMP signaling pathway                                                                                                                         |
| YCR031C   | RPS14A | Ribosomal protein 59 (rp59) of the small (40S) ribosomal subunit, required for ribosome assembly; mutations confer resistance to cryptopleurine; nearly identical to Rps14Bp and similar to E. coli S11 and rat S14 ribosomal proteins        |
| YFR031C-A | RPL2A  | Protein component of the large (60S) ribosomal subunit, identical to Rpl2Bp and has similarity to E. coli L2 and rat L8 ribosomal proteins                                                                                                    |
| YLR150W   | STM1   | Protein that binds quadruplex nucleic acids; multicopy suppressor of tom1 and pop2 mutations; acts with Cdc13p to maintain telomere structure                                                                                                 |
| YKL006W   | RPL14A | N-terminally acetylated protein component of the large (60S) ribosomal subunit, nearly identical to Rpl14Bp and has similarity to rat L14 ribosomal protein; rpl14a csh5 double null mutant exhibits synthetic slow growth                    |
| YKL056C   | None   |                                                                                                                                                                                                                                               |
| YGL120C   | PRP43  | RNA helicase in the DEAH-box family, involved in release of the lariat-intron from the spliceosome                                                                                                                                            |
| YBL072C   | RPS8A  | Protein component of the small (40S) ribosomal subunit; identical to Rps8Ap and has similarity to rat S8 ribosomal protein                                                                                                                    |
| YLR367W   | RPS22B | Protein component of the small (40S) ribosomal subunit; nearly                                                                                                                                                                                |

|           |        |                                                                                                                                                                                                                                               |
|-----------|--------|-----------------------------------------------------------------------------------------------------------------------------------------------------------------------------------------------------------------------------------------------|
|           |        | identical to Rps22Ap and has similarity to E. coli S8 and rat S15a ribosomal proteins                                                                                                                                                         |
| YPL143W   | RPL33A | N-terminally acetylated ribosomal protein L37 of the large (60S) ribosomal subunit, nearly identical to Rpl33Bp and has similarity to rat L35a; rpl33a null mutant exhibits slow growth while rpl33a rpl33b double null mutant is inviable    |
| YHL033C   | RPL8A  | Ribosomal protein L4 of the large (60S) ribosomal subunit, nearly identical to Rpl8Bp and has similarity to rat L7a ribosomal protein; mutation results in decreased amounts of free 60S subunits                                             |
| YDR417C   | None   |                                                                                                                                                                                                                                               |
| YGL135W   | RPL1B  | N-terminally acetylated protein component of the large (60S) ribosomal subunit, nearly identical to Rpl1Bp and has similarity to E. coli L1 and rat L10a ribosomal proteins; rpl1a rpl1b double null mutation is lethal                       |
| YML024W   | RPS17A | Ribosomal protein 51 (rp51) of the small (40s) subunit; nearly identical to Rps17Bp and has similarity to rat S17 ribosomal protein                                                                                                           |
| YJR094W-A | RPL43B | Protein component of the large (60S) ribosomal subunit, identical to Rpl43Ap and has similarity to rat L37a ribosomal protein                                                                                                                 |
| YGR027C   | RPS25A | Protein component of the small (40S) ribosomal subunit; nearly identical to Rps25Bp and has similarity to rat S25 ribosomal protein                                                                                                           |
| YNL178W   | RPS3   | Protein component of the small (40S) ribosomal subunit, has apurinic/aprimidinic (AP) endonuclease activity; essential for viability; has similarity to E. coli S3 and rat S3 ribosomal proteins                                              |
| YLR076C   | None   |                                                                                                                                                                                                                                               |
| YHR010W   | RPL27A | Protein component of the large (60S) ribosomal subunit, nearly identical to Rpl27Bp and has similarity to rat L27 ribosomal protein                                                                                                           |
| YJL188C   | BUD19  | Dubious open reading frame, unlikely to encode a protein; not conserved in closely related Saccharomyces species; 88% of ORF overlaps the verified gene RPL39; diploid mutant displays a weak budding pattern phenotype in a systematic assay |
| YPL131W   | RPL5   | Protein component of the large (60S) ribosomal subunit with similarity to E. coli L18 and rat L5 ribosomal proteins; binds 5S rRNA and is required for 60S subunit assembly                                                                   |
| YPL211W   | NIP7   | Nip7p is required for 60S ribosome subunit biogenesis; involved in ribosome biogenesis                                                                                                                                                        |
| YLL045C   | RPL8B  | Ribosomal protein L4 of the large (60S) ribosomal subunit, nearly identical to Rpl8Ap and has similarity to rat L7a ribosomal protein; mutation results in decreased amounts of free 60S subunits                                             |
| YGL123W   | RPS2   | Protein component of the small (40S) subunit, essential for control of translational accuracy; has similarity to E. coli S5 and rat S2 ribosomal proteins                                                                                     |
| YJR070C   | LIA1   | Protein that binds to the C-terminal domain of Hyp2p (eIF5A); has four to five HEAT-like repeats                                                                                                                                              |
| YOR167C   | RPS28A | Protein component of the small (40S) ribosomal subunit; nearly                                                                                                                                                                                |

|           |        |                                                                                                                                                                                                                                            |
|-----------|--------|--------------------------------------------------------------------------------------------------------------------------------------------------------------------------------------------------------------------------------------------|
|           |        | identical to Rps28Ap and has similarity to rat S28 ribosomal protein                                                                                                                                                                       |
| YOR095C   | RKI1   | Ribose-5-phosphate ketol-isomerase                                                                                                                                                                                                         |
| YEL055C   | POL5   | Protein with sequence similarity to the human MybBP1A and weak sequence similar to B-type DNA polymerases, not required for chromosomal DNA replication; required for the synthesis of rRNA                                                |
| YDL229W   | SSB1   | Stress-Seventy Subfamily B; involved in translation, perhaps by guiding the nascent chain through the ribosome; cytoplasmic member of the HSP70 family                                                                                     |
| YPR118W   | None   |                                                                                                                                                                                                                                            |
| YGR118W   | RPS23A | Ribosomal protein 28 (rp28) of the small (40S) ribosomal subunit, required for translational accuracy; nearly identical to Rps23Bp and similar to E. coli S12 and rat S23 ribosomal proteins; deletion of both RPS23A and RPS23B is lethal |
| YGR214W   | RPS0A  | Protein component of the small (40S) ribosomal subunit, nearly identical to Rps0Bp; required for maturation of 18S rRNA along with Rps0Bp; deletion of either RPS0 gene reduces growth rate, deletion of both genes is lethal              |
| YDL133C-A | RPL41B | Ribosomal protein L47 of the large (60S) ribosomal subunit, identical to Rpl41Ap and has similarity to rat L41 ribosomal protein; comprised of only 25 amino acids; rpl41a rpl41b double null mutant is viable                             |
| YLR167W   | RPS31  | Fusion protein that is cleaved to yield a ribosomal protein of the small (40S) subunit and ubiquitin; ubiquitin may facilitate assembly of the ribosomal protein into ribosomes; interacts genetically with translation factor eIF2B       |
| YHR127W   | None   |                                                                                                                                                                                                                                            |
| YHR089C   | GAR1   | Protein component of the H/ACA snoRNP pseudouridylase complex, involved in the modification and cleavage of the 18S pre-rRNA                                                                                                               |
| YCR087W   | None   |                                                                                                                                                                                                                                            |
| YGL103W   | RPL28  | Ribosomal protein L29 of the large (60S) ribosomal subunit, has similarity to E. coli L15 and rat L27a ribosomal proteins; may have peptidyl transferase activity; can mutate to cycloheximide resistance                                  |
| YML026C   | RPS18B | Protein component of the small (40S) ribosomal subunit; nearly identical to Rps18Ap and has similarity to E. coli S13 and rat S18 ribosomal proteins                                                                                       |
| YNL162W   | RPL42A | Protein component of the large (60S) ribosomal subunit, identical to Rpl42Bp and has similarity to rat L44 ribosomal protein                                                                                                               |
| YGR148C   | RPL24B | Ribosomal protein L30 of the large (60S) ribosomal subunit, nearly identical to Rpl24Ap and has similarity to rat L24 ribosomal protein; not essential for translation but may be required for normal translation rate                     |
| YGR034W   | RPL26B | Protein component of the large (60S) ribosomal subunit, nearly identical to Rpl26Ap and has similarity to E. coli L24 and rat L26 ribosomal proteins; binds to 5.8S rRNA                                                                   |
| YLR388W   | RPS29A | Protein component of the small (40S) ribosomal subunit; nearly identical to Rps29Bp and has similarity to rat S29 and E. coli                                                                                                              |

|         |        |                                                                                                                                                                                                                                                |
|---------|--------|------------------------------------------------------------------------------------------------------------------------------------------------------------------------------------------------------------------------------------------------|
|         |        | S14 ribosomal proteins                                                                                                                                                                                                                         |
| YLL044W | None   |                                                                                                                                                                                                                                                |
| YDR454C | GUK1   | Guanylate kinase, converts GMP to GDP; required for growth and mannose outer chain elongation of cell wall N-linked glycoproteins                                                                                                              |
| YOL120C | RPL18A | Protein component of the large (60S) ribosomal subunit, identical to Rpl18Bp and has similarity to rat L18 ribosomal protein; intron of RPL18A pre-mRNA forms stem-loop structures that are a target for Rnt1p cleavage leading to degradation |
| YOL040C | RPS15  | Protein component of the small (40S) ribosomal subunit; has similarity to E. coli S19 and rat S15 ribosomal proteins                                                                                                                           |
| YNL096C | RPS7B  | Protein component of the small (40S) ribosomal subunit, nearly identical to Rps7Ap; interacts with Kti11p; deletion causes hypersensitivity to zymocin; has similarity to rat S7 and Xenopus S8 ribosomal proteins                             |
| YJL136C | RPS21B | Protein component of the small (40S) ribosomal subunit; nearly identical to Rps21Bp and has similarity to rat S21 ribosomal protein                                                                                                            |
| YLR441C | RPS1A  | Ribosomal protein 10 (rp10) of the small (40S) subunit; nearly identical to Rps1Bp and has similarity to rat S3a ribosomal protein                                                                                                             |
| YMR121C | RPL15B | Protein component of the large (60S) ribosomal subunit, nearly identical to Rpl15Ap and has similarity to rat L15 ribosomal protein; binds to 5.8 S rRNA                                                                                       |
| YOL127W | RPL25  | Protein component of the large (60S) ribosomal subunit, has similarity to E. coli L23 and rat L23a ribosomal proteins; binds to 26S rRNA via a conserved C-terminal motif                                                                      |
| YOL039W | RPP2A  | Ribosomal protein P2 alpha, a component of the ribosomal stalk, which is involved in the interaction between translational elongation factors and the ribosome; regulates the accumulation of P1 (Rpp1Ap and Rpp1Bp) in the cytoplasm          |
| YJL183W | MNN11  | Subunit of a Golgi mannosyltransferase complex that also contains Anp1p, Mnn9p, Mnn10p, and Hoc1p, and mediates elongation of the polysaccharide mannan backbone; has homology to Mnn10p                                                       |
| YJL191W | RPS14B | Ribosomal protein 59 (rp59) of the small (40S) ribosomal subunit, required for ribosome assembly; mutations confer resistance to cryptopleurine; nearly identical to Rps14Ap and similar to E. coli S11 and rat S14 ribosomal proteins         |
| YLR448W | RPL6B  | Protein component of the large (60S) ribosomal subunit, has similarity to Rpl6Bp and to rat L6 ribosomal protein; binds to 5.8S rRNA                                                                                                           |
| YDR064W | RPS13  | Protein component of the small (40S) ribosomal subunit; has similarity to E. coli S15 and rat S13 ribosomal proteins                                                                                                                           |
| YDL083C | RPS16B | Protein component of the small (40S) ribosomal subunit; identical to Rps16Ap and has similarity to E. coli S9 and rat S16 ribosomal proteins                                                                                                   |
| YDL201W | TRM8   | Subunit of a tRNA methyltransferase complex composed of Trm8p and Trm82p that catalyzes 7-methylguanosine modification of tRNA                                                                                                                 |

|           |        |                                                                                                                                                                                                                                           |
|-----------|--------|-------------------------------------------------------------------------------------------------------------------------------------------------------------------------------------------------------------------------------------------|
| YPR044C   | None   |                                                                                                                                                                                                                                           |
| YNL244C   | SUI1   | translation initiation factor eIF1                                                                                                                                                                                                        |
| YEL042W   | GDA1   | Guanosine diphosphatase located in the Golgi, involved in the transport of GDP-mannose into the Golgi lumen by converting GDP to GMP after mannose is transferred its substrate                                                           |
| YEL026W   | SNU13  | part of small (ribosomal) subunit (SSU) processosome (contains U3 snoRNA); RNA binding protein (putative), similar to Nhp2p; U4/U6.U5 snRNP component                                                                                     |
| YLR333C   | RPS25B | Protein component of the small (40S) ribosomal subunit; nearly identical to Rps25Ap and has similarity to rat S25 ribosomal protein                                                                                                       |
| YLR325C   | RPL38  | Protein component of the large (60S) ribosomal subunit, has similarity to rat L38 ribosomal protein                                                                                                                                       |
| YOL077C   | BRX1   | Nucleolar protein involved in the biogenesis of large ribosomal subunits; depletion leads to defects in rRNA processing and a block in the assembly of large ribosomal subunits; possesses a sigma(70)-like RNA-binding motif             |
| YHR141C   | RPL42B | Protein component of the large (60S) ribosomal subunit, identical to Rpl42Ap and has similarity to rat L44; required for propagation of the killer toxin-encoding M1 double-stranded RNA satellite of the L-A double-stranded RNA virus   |
| YPL220W   | RPL1A  | N-terminally acetylated protein component of the large (60S) ribosomal subunit, nearly identical to Rpl1Bp and has similarity to E. coli L1 and rat L10a ribosomal proteins; rpl1a rpl1b double null mutation is lethal                   |
| YPL238C   | None   |                                                                                                                                                                                                                                           |
| YLR372W   | SUR4   | Elongase III synthesizes 20-26-carbon fatty acids from C18-CoA primers; involved in fatty acid biosynthesis                                                                                                                               |
| YLR287C-A | RPS30A | Protein component of the small (40S) ribosomal subunit; nearly identical to Rps30Bp and has similarity to rat S30 ribosomal protein                                                                                                       |
| YKL180W   | RPL17A | Protein component of the large (60S) ribosomal subunit, nearly identical to Rpl17Bp and has similarity to E. coli L22 and rat L17 ribosomal proteins; copurifies with the components of the outer kinetochore DASH complex                |
| YKL156W   | RPS27A | Protein component of the small (40S) ribosomal subunit; nearly identical to Rps27Bp and has similarity to rat S27 ribosomal protein                                                                                                       |
| YHR068W   | DYS1   | Deoxyhypusine synthase, catalyzes formation of deoxyhypusine, the first step in hypusine biosynthesis; triggers posttranslational hypusination of translation elongation factor eIF-5A and regulates its intracellular levels; tetrameric |
| YBL092W   | RPL32  | Protein component of the large (60S) ribosomal subunit, has similarity to rat L32 ribosomal protein; overexpression disrupts telomeric silencing                                                                                          |
| YER117W   | RPL23B | Protein component of the large (60S) ribosomal subunit, identical to Rpl23Ap and has similarity to E. coli L14 and rat L23 ribosomal proteins                                                                                             |
| YDL151C   | BUD30  | Dubious open reading frame, unlikely to encode a protein; not conserved in closely related Saccharomyces species; 96% of ORF overlaps the verified gene RPC53; diploid mutant displays                                                    |

|                              |        |                                                                                                                                                                                                                                                  |
|------------------------------|--------|--------------------------------------------------------------------------------------------------------------------------------------------------------------------------------------------------------------------------------------------------|
|                              |        | a weak budding pattern phenotype in a systematic assay                                                                                                                                                                                           |
| YNL064C                      | YDJ1   | yeast dnaJ homolog (nuclear envelope protein); heat shock protein                                                                                                                                                                                |
| YBR191W                      | RPL21A | Protein component of the large (60S) ribosomal subunit, nearly identical to Rpl21Bp and has similarity to rat L21 ribosomal protein                                                                                                              |
| YLR344W                      | RPL26A | Protein component of the large (60S) ribosomal subunit, nearly identical to Rpl26Bp and has similarity to E. coli L24 and rat L26 ribosomal proteins; binds to 5.8S rRNA                                                                         |
| YLR264W                      | RPS28B | Protein component of the small (40S) ribosomal subunit; nearly identical to Rps28Bp and has similarity to rat S28 ribosomal protein                                                                                                              |
| YPL090C                      | RPS6A  | Protein component of the small (40S) ribosomal subunit; identical to Rps6Bp and has similarity to rat S6 ribosomal protein                                                                                                                       |
| YMR242C                      | RPL20A | Protein component of the large (60S) ribosomal subunit, nearly identical to Rpl20Bp and has similarity to rat L18a ribosomal protein                                                                                                             |
| YLR432W                      | IMD3   | Inosine monophosphate dehydrogenase, catalyzes the first step of GMP biosynthesis, member of a four-gene family in <i>S. cerevisiae</i> , constitutively expressed                                                                               |
| YHR128W                      | FUR1   | Uracil phosphoribosyltransferase, synthesizes UMP from uracil; involved in the pyrimidine salvage pathway                                                                                                                                        |
| (57) MODULE 65               |        |                                                                                                                                                                                                                                                  |
| <b>Expression regulators</b> |        |                                                                                                                                                                                                                                                  |
| YPR013C                      | None   |                                                                                                                                                                                                                                                  |
| YOR363C                      | PIP2   | peroxisome induction pathway 2 (PIP2); transcriptional activator of peroxisome proliferation; may form heterodimer with Oaf1 to activate oleate-inducible gene expression; activator of peroxisome proliferation                                 |
| YNL305C                      | None   |                                                                                                                                                                                                                                                  |
| YDR195W                      | REF2   | RNA-binding protein involved in the cleavage step of mRNA 3'-end formation prior to polyadenylation; also involved in snoRNA maturation                                                                                                          |
| <b>Genotype regulators</b>   |        |                                                                                                                                                                                                                                                  |
| M9_415311_420076             |        | YVH1(2,4) DAL1(2,2) DAL4(2,2) DAL2(1,4) DCG1(3,3) YIR030W-A DAL7(1,2) DAL3(2,4) MGA2(15,4) LYS1(0,1) YIR035C YIR036C YIR036W-A HYR1(0,3) GTT1(1,20)                                                                                              |
| <b>Module genes</b>          |        |                                                                                                                                                                                                                                                  |
| YJL077C                      | ICS3   | Protein of unknown function                                                                                                                                                                                                                      |
| YDR259C                      | YAP6   | Basic leucine zipper (bZIP) transcription factor                                                                                                                                                                                                 |
| YHL035C                      | VMR1   | Protein of unknown function, member of the ATP-binding cassette (ABC) family, potential Cdc28p substrate                                                                                                                                         |
| YDR263C                      | DIN7   | Mitochondrial nuclease functioning in DNA repair and replication, modulates the stability of the mitochondrial genome, induced by exposure to mutagens, also induced during meiosis at a time nearly coincident with commitment to recombination |
| YIR019C                      | MUC1   | GPI-anchored cell surface glycoprotein required for diploid pseudohyphal formation and haploid invasive growth, transcriptionally regulated by the MAPK pathway (via Ste12p)                                                                     |

|                              |       |                                                                                                                                                                                                                     |
|------------------------------|-------|---------------------------------------------------------------------------------------------------------------------------------------------------------------------------------------------------------------------|
|                              |       | and Tec1p) and the cAMP pathway (via Flo8p)                                                                                                                                                                         |
| YHL042W                      | None  |                                                                                                                                                                                                                     |
| YPL236C                      | None  |                                                                                                                                                                                                                     |
| YHL043W                      | ECM34 | Non-essential protein of unknown function                                                                                                                                                                           |
| YDL037C                      | BSC1  | Protein of unconfirmed function, similar to cell surface flocculin Muc1p; ORF exhibits genomic organization compatible with a translational readthrough-dependent mode of expression                                |
| YKL202W                      | None  |                                                                                                                                                                                                                     |
| YDL038C                      | None  |                                                                                                                                                                                                                     |
| YKL200C                      | None  |                                                                                                                                                                                                                     |
| YOR009W                      | TIR4  | None                                                                                                                                                                                                                |
| YNL142W                      | MEP2  | Ammonia permease; belongs to a ubiquitous family of cytoplasmic membrane proteins that transport only ammonium (NH <sub>4</sub> <sup>+</sup> )                                                                      |
| YDL039C                      | PRM7  | Pheromone-regulated protein, predicted to have one transmembrane segment; promoter contains Gcn4p binding elements                                                                                                  |
| <b>(58) MODULE 67</b>        |       |                                                                                                                                                                                                                     |
| <b>Genotype regulators</b>   |       |                                                                                                                                                                                                                     |
| M4_527445_527517             |       | YDR034C-A YDR034W-B ARO3(0,3) EHD3(0,3) KRS1(0,3) ENA5(29,341) ENA2(24,290) ENA1(13,15)                                                                                                                             |
| <b>Module genes</b>          |       |                                                                                                                                                                                                                     |
| YDR038C                      | ENA5  | Protein with similarity to P-type ATPase sodium pumps                                                                                                                                                               |
| YDR033W                      | MRH1  | Protein that localizes primarily to the plasma membrane, also found at the nuclear envelope; has similarity to Hsp30p and Yro2p, which are induced during heat shock                                                |
| YDR039C                      | ENA2  | P-type ATPase sodium pump, involved in Na <sup>+</sup> efflux to allow salt tolerance; likely not involved in Li <sup>+</sup> efflux                                                                                |
| YDR040C                      | ENA1  | P-type ATPase sodium pump, involved in Na <sup>+</sup> and Li <sup>+</sup> efflux to allow salt tolerance                                                                                                           |
| YCR073C                      | SSK22 | functionally redundant with, and homologous to, SSK2; protein kinase                                                                                                                                                |
| <b>(59) MODULE 68</b>        |       |                                                                                                                                                                                                                     |
| <b>Expression regulators</b> |       |                                                                                                                                                                                                                     |
| YOR047C                      | STD1  | Protein that interacts with the Snf1p protein kinase and Spt15p in two-hybrid and in in vitro binding studies                                                                                                       |
| YDL170W                      | UGA3  | Transcriptional activator necessary for gamma-aminobutyrate (GABA)-dependent induction of GABA genes (such as UGA1, UGA2, UGA4); zinc-finger transcription factor of the Zn(2)-Cys(6) binuclear cluster domain type |
| YOR047C                      | STD1  | Protein that interacts with the Snf1p protein kinase and Spt15p in two-hybrid and in in vitro binding studies                                                                                                       |
| YNL068C                      | FKH2  | Transcription factor of the forkhead family that regulates the cell cycle and pseudohyphal growth; also involved in chromatin silencing at HML and HMR; potential Cdc28p substrate                                  |
| YBR212W                      | NGR1  | negative growth regulatory protein                                                                                                                                                                                  |
| YJL056C                      | ZAP1  | Zinc-regulated transcription factor, binds to zinc-responsive promoter elements to induce transcription of certain genes in the                                                                                     |

|                     |       |                                                                                                                                                                                                                                                                                            |
|---------------------|-------|--------------------------------------------------------------------------------------------------------------------------------------------------------------------------------------------------------------------------------------------------------------------------------------------|
|                     |       | presence of zinc; regulates its own transcription; contains seven zinc-finger domains                                                                                                                                                                                                      |
| YMR019W             | STB4  | Protein that binds Sin3p in a two-hybrid assay                                                                                                                                                                                                                                             |
| <b>Module genes</b> |       |                                                                                                                                                                                                                                                                                            |
| YOR099W             | KTR1  | Alpha-1,2-mannosyltransferase involved in O- and N-linked protein glycosylation; member of the KRE2/MNT1 mannosyltransferase family                                                                                                                                                        |
| YOL076W             | MDM20 | Subunit of the NatB N-terminal acetyltransferase, which catalyzes acetylation of the amino-terminal methionine residues of all proteins beginning with Met-Asp or Met-Glu and of some proteins beginning with Met-Asn or Met-Met; involved in mitochondrial inheritance and actin assembly |
| YNL169C             | PSD1  | Phosphatidylserine decarboxylase of the mitochondrial inner membrane, converts phosphatidylserine to phosphatidylethanolamine                                                                                                                                                              |
| YJL153C             | INO1  | Inositol 1-phosphate synthase, involved in synthesis of inositol phosphates and inositol-containing phospholipids; transcription is coregulated with other phospholipid biosynthetic genes by Ino2p and Ino4p, which bind the UASINO DNA element                                           |
| YHR177W             | None  |                                                                                                                                                                                                                                                                                            |
| YJR106W             | ECM27 | Non-essential protein of unknown function                                                                                                                                                                                                                                                  |
| YOL013C             | HRD1  | Ubiquitin-protein ligase required for endoplasmic reticulum-associated degradation (ERAD) of misfolded proteins; genetically linked to the unfolded protein response (UPR); regulated through association with Hrd3p; contains an H2 ring finger                                           |
| YKL073W             | LHS1  | Molecular chaperone of the endoplasmic reticulum lumen, involved in polypeptide translocation and folding; member of the Hsp70 family; localizes to the lumen of the ER; regulated by the unfolded protein response pathway                                                                |
| YCL043C             | PDI1  | Protein disulfide isomerase, multifunctional protein resident in the endoplasmic reticulum lumen, essential for the formation of disulfide bonds in secretory and cell-surface proteins, unscrambles non-native disulfide bonds                                                            |
| YPL021W             | ECM23 | Non-essential protein of unconfirmed function; affects pre-rRNA processing, may act as a negative regulator of the transcription of genes involved in pseudohyphal growth; homologous to Srd1p                                                                                             |
| YDR516C             | EMI2  | Non-essential protein of unknown function required for transcriptional induction of the early meiotic-specific transcription factor IME1, also required for sporulation                                                                                                                    |
| YLR133W             | CKI1  | choline kinase                                                                                                                                                                                                                                                                             |
| YMR214W             | SCJ1  | dnaJ homolog                                                                                                                                                                                                                                                                               |
| YGL126W             | SCS3  | Protein required for inositol prototrophy                                                                                                                                                                                                                                                  |
| YJR073C             | OPI3  | Phospholipid methyltransferase (methylene-fatty-acyl-phospholipid synthase), catalyzes the last two steps in phosphatidylcholine biosynthesis                                                                                                                                              |
| YDR519W             | FPR2  | Membrane-bound peptidyl-prolyl cis-trans isomerase (PPIase), binds to the drugs FK506 and rapamycin; expression pattern suggests possible involvement in ER protein trafficking                                                                                                            |



|                              |       |                                                                                                                                                                                                                                                                                  |
|------------------------------|-------|----------------------------------------------------------------------------------------------------------------------------------------------------------------------------------------------------------------------------------------------------------------------------------|
| YKL126W                      | YPK1  | 76.5 kDa Serine/threonine protein kinase with similarity to protein kinase C, is 90% identical to Ypk2p                                                                                                                                                                          |
| YHR142W                      | CHS7  | Protein of unknown function, involved in chitin biosynthesis by regulating Chs3p export from the ER                                                                                                                                                                              |
| YDR277C                      | MTH1  | Negative regulator of the glucose-sensing signal transduction pathway, required for repression of transcription by Rgt1p; interacts with Rgt1p and the Snf3p and Rgt2p glucose sensors; phosphorylated by Yck1p, triggering Mth1p degradation                                    |
| YML028W                      | TSA1  | Thioredoxin-peroxidase (TPx), reduces H <sub>2</sub> O <sub>2</sub> and alkyl hydroperoxides with the use of hydrogens provided by thioredoxin, thioredoxin reductase, and NADPH; provides protection against oxidation systems that generate reactive oxygen and sulfur species |
| YOL031C                      | SIL1  | ER-localized protein required for protein translocation into the ER, interacts with the ATPase domain of the Kar2p chaperone suggesting some role in modulating its activity; homolog of <i>Yarrowia lipolytica</i> SLS1; GrpE-like protein in the ER                            |
| YBR201W                      | DER1  | Endoplasmic reticulum membrane protein, required for the protein degradation process associated with the ER, involved in the retrograde transport of misfolded or unassembled proteins                                                                                           |
| YDL193W                      | None  |                                                                                                                                                                                                                                                                                  |
| YGR284C                      | ERV29 | Protein localized to COPII-coated vesicles, involved in vesicle formation and incorporation of specific secretory cargo                                                                                                                                                          |
| YJL082W                      | IML2  | Protein of unknown function, green fluorescent protein (GFP)-fusion protein localizes to the cytoplasm and nucleus                                                                                                                                                               |
| YMR184W                      | None  |                                                                                                                                                                                                                                                                                  |
| YML130C                      | ERO1  | Glycoprotein required for oxidative protein folding in the endoplasmic reticulum                                                                                                                                                                                                 |
| YNL043C                      | None  |                                                                                                                                                                                                                                                                                  |
| YNL170W                      | None  |                                                                                                                                                                                                                                                                                  |
| YJL034W                      | KAR2  | ATPase involved in protein import into the ER, also acts as a chaperone to mediate protein folding in the ER and may play a role in ER export of soluble proteins; regulates the unfolded protein response via interaction with Ire1p                                            |
| YKL165C                      | MCD4  | Protein involved in glycosylphosphatidylinositol (GPI) anchor synthesis; multimembrane-spanning protein that localizes to the endoplasmic reticulum; highly conserved among eukaryotes                                                                                           |
| YER142C                      | MAG1  | 3-methyl-adenine DNA glycosylase involved in protecting DNA against alkylating agents; initiates base excision repair by removing damaged bases to create abasic sites that are subsequently repaired                                                                            |
| YOR288C                      | MPD1  | Member of the protein disulfide isomerase (PDI) family; overexpression suppresses the defect in maturation of carboxypeptidase Y, and defects in other essential Pdi1p functions, caused by PDI1 deletion                                                                        |
| YLL016W                      | None  |                                                                                                                                                                                                                                                                                  |
| YKR011C                      | None  |                                                                                                                                                                                                                                                                                  |
| YNL144C                      | None  |                                                                                                                                                                                                                                                                                  |
| (60) MODULE 69               |       |                                                                                                                                                                                                                                                                                  |
| <b>Expression regulators</b> |       |                                                                                                                                                                                                                                                                                  |

|                     |       |                                                                                                                                                                                                                                                |
|---------------------|-------|------------------------------------------------------------------------------------------------------------------------------------------------------------------------------------------------------------------------------------------------|
| YLR452C             | SST2  | Protein involved in desensitization to alpha-factor pheromone; member of the RGS (regulator of G-protein signalling) family; GTPase-activating protein                                                                                         |
| YGR097W             | ASK10 | Component of the RNA polymerase II holoenzyme, phosphorylated in response to oxidative stress; has a role in destruction of Ssn8p, which relieves repression of stress-response genes                                                          |
| YCL055W             | KAR4  | Transcription factor required for induction of KAR3 and CIK1 during mating, also required during meiosis; exists in two forms, a slower-migrating form more abundant during vegetative growth and a faster-migrating form induced by pheromone |
| YDR195W             | REF2  | RNA-binding protein involved in the cleavage step of mRNA 3'-end formation prior to polyadenylation; also involved in snoRNA maturation                                                                                                        |
| YDR283C             | GCN2  | Protein kinase, phosphorylates the alpha-subunit of translation initiation factor eIF2 (Sui2p) in response to starvation; activated by uncharged tRNAs and the Gcn1p-Gcn20p complex                                                            |
| YPR070W             | MED1  | Subunit 1 of the Mediator complex essential for transcriptional regulation                                                                                                                                                                     |
| <b>Module genes</b> |       |                                                                                                                                                                                                                                                |
| YML048W-A           | None  |                                                                                                                                                                                                                                                |
| YPR115W             | None  |                                                                                                                                                                                                                                                |
| YHR005C             | GPA1  | Alpha subunit of G protein coupled to mating factor receptors, involved in the mating pheromone signal transduction pathway; component of pheromone response pathway common to both a and alpha cells                                          |
| YJL157C             | FAR1  | Cyclin-dependent kinase inhibitor that mediates cell cycle arrest in response to pheromone; also forms a complex with Cdc24p, Ste4p, and Ste18p that may specify the direction of polarized growth during mating; potential Cdc28p substrate   |
| YBR083W             | TEC1  | transcription factor of the TEA/ATTS DNA-binding domain family, regulator of Ty1 expression                                                                                                                                                    |
| YKL189W             | HYM1  | Component of the RAM signaling network that is involved in regulation of Ace2p activity and cellular morphogenesis, interacts with Kic1p and Sog2p, localizes to sites of polarized growth during budding and during the mating response       |
| YML046W             | PRP39 | U1 snRNP protein involved in splicing, contains multiple tetra-tricopeptide repeats                                                                                                                                                            |
| YBL016W             | FUS3  | Mitogen-activated protein kinase (MAPK) involved in mating pheromone response; activated by phosphorylation by Ste7p; controls different aspects of the mating response by phosphorylating transcriptional and cytoplasmic targets             |
| YMR065W             | KAR5  | Protein required for nuclear membrane fusion during karyogamy, localizes to the membrane with a soluble portion in the endoplasmic reticulum lumen, may form a complex with Jem1p and Kar2p; expression of the gene is regulated by pheromone  |
| YNL192W             | CHS1  | Chitin synthase I, requires activation from zymogenic form in order to catalyze the transfer of N-acetylglucosamine (GlcNAc) to chitin; required for repairing the chitin septum during cytokinesis; transcription activated by mating factor  |

|         |       |                                                                                                                                                                                                                                      |
|---------|-------|--------------------------------------------------------------------------------------------------------------------------------------------------------------------------------------------------------------------------------------|
| YCR089W | FIG2  | Cell wall adhesin, expressed specifically during mating; may be involved in maintenance of cell wall integrity during mating                                                                                                         |
| YDL127W | PCL2  | G1 cyclin, associates with Pho85p cyclin-dependent kinase (Cdk) to contribute to entry into the mitotic cell cycle, essential for cell morphogenesis; localizes to sites of polarized cell growth                                    |
| YIL037C | PRM2  | Pheromone-regulated protein, predicted to have 4 transmembrane segments and a coiled coil domain; regulated by Ste12p                                                                                                                |
| YIL117C | PRM5  | Pheromone-regulated protein, predicted to have 1 transmembrane segment; induced during cell integrity signalling                                                                                                                     |
| YBR040W | FIG1  | Integral membrane protein required for efficient mating; may participate in or regulate the low affinity Ca <sup>2+</sup> influx system, which affects intracellular signaling and cell-cell fusion during mating                    |
| YCL027W | FUS1  | Membrane protein localized to the shmoo tip, required for cell fusion; expression regulated by mating pheromone; proposed to coordinate signaling, fusion, and polarization events required for fusion; potential Cdc28p substrate   |
| YFR026C | None  |                                                                                                                                                                                                                                      |
| YDL089W | None  |                                                                                                                                                                                                                                      |
| YDR309C | GIC2  | Protein of unknown function involved in initiation of budding and cellular polarization, interacts with Cdc42p via the Cdc42/Rac-interactive binding (CRIB) domain                                                                   |
| YDR085C | AFR1  | coordinates regulation of alpha-factor receptor signalling and induction of morphogenesis during conjugation; cytoskeletal protein, similar to arrestins                                                                             |
| YNR044W | AGA1  | Anchorage subunit of a-agglutinin of a-cells, highly O-glycosylated protein with N-terminal secretion signal and C-terminal signal for addition of GPI anchor to cell wall, linked to adhesion subunit Aga2p via two disulfide bonds |
| YOR343C | None  |                                                                                                                                                                                                                                      |
| YKL104C | GFA1  | Glutamine-fructose-6-phosphate amidotransferase, catalyzes the formation of glucosamine-6-P and glutamate from fructose-6-P and glutamine in the first step of chitin biosynthesis                                                   |
| YJR153W | PGU1  | Endo-polygalacturonase                                                                                                                                                                                                               |
| YDR125C | ECM18 | Protein of unknown function, similar to Rlp24p                                                                                                                                                                                       |
| YNL279W | PRM1  | Pheromone-regulated multispansing membrane protein involved in membrane fusion during mating; predicted to have 5 transmembrane segments and a coiled coil domain; localizes to the shmoo tip; regulated by Ste12p                   |
| YMR232W | FUS2  | Cytoplasmic protein localized to the shmoo tip; required for the alignment of parental nuclei before nuclear fusion during mating                                                                                                    |
| YDR282C | None  |                                                                                                                                                                                                                                      |
| YNL042W | BOP3  | Protein of unknown function, potential Cdc28p substrate; overproduction suppresses a pam1 slv3 double null mutation                                                                                                                  |
| YKR042W | UTH1  | Youth, involved in determining yeast longevity; involved in cell growth                                                                                                                                                              |
| YHR084W | STE12 | Transcription factor that is activated by a MAP kinase signaling cascade, activates genes involved in mating or                                                                                                                      |

|                              |       |                                                                                                                                                                                                                                                           |
|------------------------------|-------|-----------------------------------------------------------------------------------------------------------------------------------------------------------------------------------------------------------------------------------------------------------|
|                              |       | pseudohyphal/invasive growth pathways; cooperates with Tec1p transcription factor to regulate genes specific for invasive growth                                                                                                                          |
| YDR124W                      | None  |                                                                                                                                                                                                                                                           |
| <b>(61) MODULE 70</b>        |       |                                                                                                                                                                                                                                                           |
| <b>Expression regulators</b> |       |                                                                                                                                                                                                                                                           |
| YDR496C                      | PUF6  | member of the PUF protein family; YDR496C                                                                                                                                                                                                                 |
| YMR019W                      | STB4  | Protein that binds Sin3p in a two-hybrid assay                                                                                                                                                                                                            |
| YDR264C                      | AKR1  | Negative regulator of pheromone response pathway; required for endocytosis of pheromone receptors; involved in cell shape control; Ankyrin repeat-containing protein                                                                                      |
| <b>Genotype regulators</b>   |       |                                                                                                                                                                                                                                                           |
| M15_1152_43217               |       | CTR9(13,2) PSF3(1,1) PEX11(0,1) SPT20(4,15) DCP1(0,4) YOL150C GRE2(6,81) FRE7(38,11) YOL153C ZPS1(3,8) YOL155C YOL155W-A HXT11(6,53) YOL157C ENB1(5,8) YOL159C YOL159C-A YOL160W YOL161C YOL162W YOL163W YOL164W YOL164W-A AAD15(7,561) YOL166C YOL166W-A |
| <b>Module genes</b>          |       |                                                                                                                                                                                                                                                           |
| YAR066W                      | None  |                                                                                                                                                                                                                                                           |
| YIL169C                      | None  |                                                                                                                                                                                                                                                           |
| YOL155C                      | None  |                                                                                                                                                                                                                                                           |
| YAR068W                      | None  |                                                                                                                                                                                                                                                           |
| YHR214W                      | None  |                                                                                                                                                                                                                                                           |
| YHR214W-A                    | None  |                                                                                                                                                                                                                                                           |
| <b>(62) MODULE 71</b>        |       |                                                                                                                                                                                                                                                           |
| <b>Expression regulators</b> |       |                                                                                                                                                                                                                                                           |
| YJL089W                      | SIP4  | Possibly involved in Snf1p regulated transcriptional activation; shows homology to DNA binding domain of Gal4p, has a leucine zipper motif and acidic region; lexA-Sip4p activates transcription                                                          |
| YDR043C                      | NRG1  | Transcriptional repressor that recruits the Cyc8p-Tup1p complex to promoters; mediates glucose repression and negatively regulates a variety of processes including filamentous growth and alkaline pH response                                           |
| YGR288W                      | MAL13 | MAL-activator protein, part of complex locus MAL1; nonfunctional in genomic reference strain S288C                                                                                                                                                        |
| YCL026C-A                    | FRM2  | Protein of unknown function, involved in the integration of lipid signaling pathways with cellular homeostasis                                                                                                                                            |
| YKR099W                      | BAS1  | Myb-related transcription factor involved in regulating basal and induced expression of genes of the purine and histidine biosynthesis pathways                                                                                                           |
| YGL180W                      | ATG1  | Protein serine/threonine kinase, required for autophagy and for the cytoplasm-to-vacuole targeting (Cvt) pathway                                                                                                                                          |
| YAL056W                      | GPB2  | Proposed beta subunit of the heterotrimeric G protein that interacts with the receptor Grp1p, has signaling role in response to nutrients; involved in regulation of pseudohyphal growth through cAMP levels; homolog of Gpb1p                            |

| <b>Module genes</b> |       |                                                                                                                                                                                                                                   |
|---------------------|-------|-----------------------------------------------------------------------------------------------------------------------------------------------------------------------------------------------------------------------------------|
| YGL249W             | ZIP2  | Required for 'ZIPpering' up meiotic chromosomes during chromosome synapsis; involved in meiotic recombination and disjunction                                                                                                     |
| YJR154W             | None  |                                                                                                                                                                                                                                   |
| YMR126C             | DLT1  | Protein of unknown function, deletion causes sensitivity to thermal stress                                                                                                                                                        |
| YGR161C             | RTS3  | Hypothetical ORF                                                                                                                                                                                                                  |
| YGR065C             | VHT1  | vitamin H transporter; H <sup>+</sup> -biotin symporter                                                                                                                                                                           |
| YNR058W             | BIO3  | 7,8-diamino-pelargonic acid aminotransferase (DAPA), catalyzes the second step in the biotin biosynthesis pathway; BIO3 is in a cluster of 3 genes (BIO3, BIO4, and BIO5) that mediate biotin synthesis                           |
| YMR271C             | URA10 | Fifth step in pyrimidine bio5; Orotate phosphoribosyltransferase 2                                                                                                                                                                |
| YIR005W             | IST3  | Component of the U2 snRNP, required for the first catalytic step of splicing and for spliceosomal assembly; interacts with Rds3p and is required for Mer1p-activated splicing                                                     |
| YHR199C             | FMP34 | The authentic, non-tagged protein was localized to the mitochondria                                                                                                                                                               |
| YGL183C             | MND1  | needed for Meiotic Nuclear Divisions                                                                                                                                                                                              |
| YER184C             | None  |                                                                                                                                                                                                                                   |
| YOR100C             | CRC1  | Mitochondrial inner membrane carnitine transporter, required for carnitine-dependent transport of acetyl-CoA from peroxisomes to mitochondria during fatty acid beta-oxidation                                                    |
| YNL125C             | ESBP6 | Protein with similarity to monocarboxylate permeases, appears not to be involved in transport of monocarboxylates such as lactate, pyruvate or acetate across the plasma membrane                                                 |
| YPR078C             | None  |                                                                                                                                                                                                                                   |
| YNR056C             | BIO5  | Putative transmembrane protein involved in the biotin biosynthesis pathway; responsible for uptake of 7-keto 8-aminopelargonic acid; BIO5 is in a cluster of 3 genes (BIO3, BIO4, and BIO5) that mediate biotin synthesis         |
| YBR105C             | VID24 | also involved in vacuolar protein targeting; peripheral vesicle membrane protein                                                                                                                                                  |
| YGR154C             | None  |                                                                                                                                                                                                                                   |
| YPL264C             | None  |                                                                                                                                                                                                                                   |
| YLL056C             | None  |                                                                                                                                                                                                                                   |
| YIL166C             | None  |                                                                                                                                                                                                                                   |
| YJL037W             | None  |                                                                                                                                                                                                                                   |
| YNR057C             | BIO4  | Dethiobiotin synthetase, catalyzes the third step in the biotin biosynthesis pathway; BIO4 is in a cluster of 3 genes (BIO3, BIO4, and BIO5) that mediate biotin synthesis; expression appears to be repressed at low iron levels |
| YJR025C             | BNA1  | 3-hydroxyanthranilic acid dioxygenase, required for biosynthesis of nicotinic acid from tryptophan via kynurenine pathway                                                                                                         |
| YLL055W             | None  |                                                                                                                                                                                                                                   |
| YER065C             | ICL1  | Isocitrate lyase, catalyzes the formation of succinate and                                                                                                                                                                        |

|                            |       |                                                                                                                                                                                                                                                 |
|----------------------------|-------|-------------------------------------------------------------------------------------------------------------------------------------------------------------------------------------------------------------------------------------------------|
|                            |       | glyoxylate from isocitrate, a key reaction of the glyoxylate cycle; expression of ICL1 is induced by growth on ethanol and repressed by growth on glucose                                                                                       |
| YDL101C                    | DUN1  | Cell-cycle checkpoint serine-threonine kinase required for DNA damage-induced transcription of certain target genes, phosphorylation of Rad55p and Sml1p, and transient G2/M arrest after DNA damage; also regulates postreplicative DNA repair |
| YNL183C                    | NPR1  | Protein kinase that stabilizes several plasma membrane amino acid transporters by antagonizing their ubiquitin-mediated degradation                                                                                                             |
| YBR294W                    | SUL1  | Probable sulfate transport protein; sulfate uptake is mediated by specific sulfate transporters Sul1p and Sul2p, which control the concentration of endogenous activated sulfate intermediates                                                  |
| YCL049C                    | None  |                                                                                                                                                                                                                                                 |
| YDL234C                    | GYP7  | GTPase-activating protein for yeast Rab family members including: Ypt7p (most effective), Ypt1p, Ypt31p, and Ypt32p (in vitro); involved in vesicle mediated protein trafficking                                                                |
| YHL036W                    | MUP3  | Low affinity methionine permease, similar to Mup1p                                                                                                                                                                                              |
| YDL214C                    | PRR2  | Protein kinase with a possible role in MAP kinase signaling in the pheromone response pathway                                                                                                                                                   |
| YJR149W                    | None  |                                                                                                                                                                                                                                                 |
| YLR152C                    | None  |                                                                                                                                                                                                                                                 |
| YHR112C                    | None  |                                                                                                                                                                                                                                                 |
| YIR017C                    | MET28 | Transcriptional activator in the Cbf1p-Met4p-Met28p complex, participates in the regulation of sulfur metabolism                                                                                                                                |
| YMR306C-A                  | None  |                                                                                                                                                                                                                                                 |
| YER185W                    | None  |                                                                                                                                                                                                                                                 |
| YDR076W                    | RAD55 | Protein that stimulates strand exchange by stabilizing the binding of Rad51p to single-stranded DNA; involved in the recombinational repair of double-strand breaks in DNA during vegetative growth and meiosis; forms heterodimer with Rad57p  |
| YGR110W                    | None  |                                                                                                                                                                                                                                                 |
| YNR050C                    | LYS9  | Saccharopine dehydrogenase (NADP <sup>+</sup> , L-glutamate-forming); catalyzes the formation of saccharopine from alpha-aminoadipate 6-semialdehyde, which is the seventh step in lysine biosynthesis pathway                                  |
| YDR186C                    | None  |                                                                                                                                                                                                                                                 |
| YOR292C                    | None  |                                                                                                                                                                                                                                                 |
| YGR197C                    | SNG1  | Protein involved in nitrosoguanidine resistance                                                                                                                                                                                                 |
| YDL215C                    | GDH2  | NAD(+)-dependent glutamate dehydrogenase, degrades glutamate to ammonia and alpha-ketoglutarate; expression sensitive to nitrogen catabolite repression and intracellular ammonia levels                                                        |
| YIR042C                    | None  |                                                                                                                                                                                                                                                 |
| (63) MODULE 72             |       |                                                                                                                                                                                                                                                 |
| <b>Genotype regulators</b> |       |                                                                                                                                                                                                                                                 |
| M4_85846_106892            |       | ARF1(0,3) YDL193W SNF3(12,2) SEC31(6,4) YDL196W ASF2(9,4) GGC1(0,4) YDL199C MGT1(3,0) TRM8(0,4)                                                                                                                                                 |

|                              |       |                                                                                                                                                                                                                                                 |
|------------------------------|-------|-------------------------------------------------------------------------------------------------------------------------------------------------------------------------------------------------------------------------------------------------|
|                              |       | MRPL11(0,4) YDL203C RTN2(0,5) HEM3(0,5) YDL206W<br>GLE1(4,5) NHP2(1,2) CWC2(1,2) UGA4(1,9) YDL211C<br>SHR3(1,3) NOP6(0,3)                                                                                                                       |
| <b>Module genes</b>          |       |                                                                                                                                                                                                                                                 |
| YDL210W                      | UGA4  | GABA-specific transport protein                                                                                                                                                                                                                 |
| YDL205C                      | HEM3  | Phorphobilinogen deaminase, catalyzes the conversion of 4-porphobilinogen to hydroxymethylbilane, the third step in the heme biosynthetic pathway; localizes to both the cytoplasm and nucleus; expression is regulated by Hap2p-Hap3p          |
| YPL201C                      | None  |                                                                                                                                                                                                                                                 |
| YDL227C                      | HO    | Site-specific endonuclease required for gene conversion at the MAT locus (homothallic switching) through the generation of a ds DNA break; expression restricted to mother cells in late G1 as controlled by Swi4p-Swi6p, Swi5p and Ash1p       |
| (64) MODULE 73               |       |                                                                                                                                                                                                                                                 |
| <b>Genotype regulators</b>   |       |                                                                                                                                                                                                                                                 |
| M7_375499_375499             |       | YGL063C-A PUS2(2,1) MRH4(0,1) ALG2(3,1) SGF73(6,1)<br>NPY1(1,1) MNP1(0,0) SRF3(1,0) RPB9(0,0) RCS1(8,1)<br>YGL072C HSF1(6,2) YGL074C MPS2(2,3)                                                                                                  |
| M7_402833_415585             |       | YGL039W HEM2(0,1) YGL041C YGL041C-B YGL041W-A<br>YGL042C DST1(0,5) RNA15(1,3) RIM8(4,11) YGL046W<br>YGL047W RPT6(0,1) TIF4632(5,4) YGL050W MST27(8,49)<br>YGL052W PRM8(96,548) ERV14(0,233) OLE1(1,14)<br>SDS23(4,14) YGL057C RAD6(0,1) YGL059W |
| <b>Module genes</b>          |       |                                                                                                                                                                                                                                                 |
| YGL053W                      | PRM8  | Pheromone-regulated protein with 2 predicted transmembrane segments and an FF sequence, a motif involved in COPII binding; forms a complex with Prp9p in the ER                                                                                 |
| YOR027W                      | STI1  | Heat shock protein also induced by canavanine and entry into stationary phase                                                                                                                                                                   |
| YGL051W                      | MST27 | Putative integral membrane protein, involved in vesicle formation; forms complex with Mst28p; member of DUP240 gene family; binds COPI and COPII vesicles                                                                                       |
| YGL057C                      | None  |                                                                                                                                                                                                                                                 |
| YNL007C                      | SIS1  | HSP40 family chaperone; sit4 suppressor, dnaJ homolog                                                                                                                                                                                           |
| YAR033W                      | MST28 | Putative integral membrane protein, involved in vesicle formation; forms complex with Mst27p; member of DUP240 gene family; binds COPI and COPII vesicles                                                                                       |
| YGL052W                      | None  |                                                                                                                                                                                                                                                 |
| (65) MODULE 75               |       |                                                                                                                                                                                                                                                 |
| <b>Expression regulators</b> |       |                                                                                                                                                                                                                                                 |
| YGL037C                      | PNC1  | NAD(+) salvage pathway gene; pyrazinamidase and nicotinamidase                                                                                                                                                                                  |
| YGL099W                      | LSG1  | Putative GTPase involved in 60S ribosomal subunit biogenesis; localized to the cytoplasm                                                                                                                                                        |
| YGL037C                      | PNC1  | NAD(+) salvage pathway gene; pyrazinamidase and nicotinamidase                                                                                                                                                                                  |
| YER054C                      | GIP2  | Putative regulatory subunit of the protein phosphatase Glc7p, proposed to be involved in glycogen metabolism; contains a                                                                                                                        |

|                     |           |                                                                                                                                                                                                                                                 |
|---------------------|-----------|-------------------------------------------------------------------------------------------------------------------------------------------------------------------------------------------------------------------------------------------------|
|                     |           | conserved motif (GVNK motif) that is also found in Gac1p, Pig1p, and Pig2p                                                                                                                                                                      |
| YBR140C             | IRA1      | GTPase-activating protein that negatively regulates RAS by converting it from the GTP- to the GDP-bound inactive form, required for reducing cAMP levels under nutrient limiting conditions, mediates membrane association of adenylate cyclase |
| YCR040W             | MATALPHA1 | Transcriptional co-activator involved in regulation of mating-type-specific gene expression; targets the transcription factor Mcm1p to the promoters of alpha-specific genes; one of two genes encoded by the alpha mating type cassette        |
| YHR122W             | None      |                                                                                                                                                                                                                                                 |
| <b>Module genes</b> |           |                                                                                                                                                                                                                                                 |
| YGL146C             | None      |                                                                                                                                                                                                                                                 |
| YDR154C             | None      |                                                                                                                                                                                                                                                 |
| YJR019C             | TES1      | Thioesterase; peroxisomal acyl-CoA thioesterase                                                                                                                                                                                                 |
| YER041W             | YEN1      | Protein of unknown function, has similarity to endonuclease Rth1p; potentially phosphorylated by Cdc28p                                                                                                                                         |
| YDR513W             | TTR1      | Glutaredoxin (thioltransferase) (glutathione reductase)                                                                                                                                                                                         |
| YBR052C             | None      |                                                                                                                                                                                                                                                 |
| YBR139W             | None      |                                                                                                                                                                                                                                                 |
| YGL038C             | OCH1      | Mannosyltransferase of the cis-Golgi apparatus, initiates the polymannose outer chain elongation of N-linked oligosaccharides of glycoproteins                                                                                                  |
| YIR037W             | HYR1      | Thiol peroxidase that functions as a hydroperoxide receptor to sense intracellular hydroperoxide levels and transduce a redox signal to the Yap1p transcription factor                                                                          |
| YDR077W             | SED1      | Isolated as a suppressor of an erd2 deletion mutant (ERD2 is the HDEL receptor that sorts ER proteins), SED1 encodes a cell wall protein.                                                                                                       |
| YDR535C             | None      |                                                                                                                                                                                                                                                 |
| YDL023C             | SRF4      | Dubious open reading frame, unlikely to encode a protein; not conserved in closely related Saccharomyces species; 80% of ORF overlaps the verified gene GPD1; deletion in cyr1 mutant results in loss of stress resistance                      |
| YKR089C             | STC1      | Protein of unknown function found in lipid particles; potential Cdc28p substrate                                                                                                                                                                |
| YJL137C             | GLG2      | Self-glucosylating initiator of glycogen synthesis, also glucosylates n-dodecyl-beta-D-maltoside; similar to mammalian glycogenin                                                                                                               |
| YKL162C             | None      |                                                                                                                                                                                                                                                 |
| YGL081W             | None      |                                                                                                                                                                                                                                                 |
| YBR203W             | COS111    | Protein required for wild-type resistance to the antifungal drug ciclopirox olamine; not related to the COS family of subtelomerically-encoded proteins                                                                                         |
| YMR110C             | None      |                                                                                                                                                                                                                                                 |
| YPL221W             | BOP1      | Protein of unknown function, overproduction suppresses a pam1 slv3 double null mutation                                                                                                                                                         |
| YLL039C             | UBI4      | Ubiquitin, becomes conjugated to proteins, marking them for selective degradation via the ubiquitin-26S proteasome system;                                                                                                                      |



|         |        |                                                                                                                                                                                                                                                               |
|---------|--------|---------------------------------------------------------------------------------------------------------------------------------------------------------------------------------------------------------------------------------------------------------------|
|         |        | essential for the cellular stress response                                                                                                                                                                                                                    |
| YDR343C | HXT6   | High-affinity glucose transporter of the major facilitator superfamily, nearly identical to Hxt7p, expressed at high basal levels relative to other HXTs, repression of expression by high glucose requires SNF3                                              |
| YDL022W | GPD1   | glycerol-3-phosphate dehydrogenase                                                                                                                                                                                                                            |
| YLR257W | None   |                                                                                                                                                                                                                                                               |
| YJR059W | PTK2   | Putative serine/threonine protein kinase that enhances spermine uptake; putative serine/threonine kinase involved in spermine metabolism                                                                                                                      |
| YBR053C | None   |                                                                                                                                                                                                                                                               |
| YHR030C | SLT2   | Suppressor of <i>lyt2</i> ; serine/threonine MAP kinase                                                                                                                                                                                                       |
| YAL060W | BDH1   | NAD-dependent (2R,3R)-2,3-butanediol dehydrogenase, a zinc-containing medium-chain alcohol dehydrogenase, produces 2,3-butanediol from acetoin during fermentation and allows using 2,3-butanediol as a carbon source during aerobic growth                   |
| YHR037W | PUT2   | delta-1-pyrroline-5-carboxylate dehydrogenase                                                                                                                                                                                                                 |
| YIL065C | FIS1   | Mitochondrial outer membrane protein involved in membrane fission, required for localization of Dnm1p and Mdv1p during mitochondrial division                                                                                                                 |
| YIL111W | COX5B  | Subunit Vb of cytochrome c oxidase, which is the terminal member of the mitochondrial inner membrane electron transport chain; predominantly expressed during anaerobic growth while its isoform Va (Cox5Ap) is expressed during aerobic growth               |
| YOR176W | HEM15  | Ferrochelatase, a mitochondrial inner membrane protein, catalyzes the insertion of ferrous iron into protoporphyrin IX, the eighth and final step in the heme biosynthetic pathway; Yfh1p mediates the use of iron by Hem15p                                  |
| YBR056W | None   |                                                                                                                                                                                                                                                               |
| YML004C | GLO1   | Monomeric glyoxalase I, catalyzes the detoxification of methylglyoxal (a by-product of glycolysis) via condensation with glutathione to produce S-D-lactoylglutathione; expression regulated by methylglyoxal levels and osmotic stress                       |
| YLL026W | HSP104 | Heat shock protein that cooperates with Ydj1p (Hsp40) and Ssa1p (Hsp70) to refold and reactivate previously denatured, aggregated proteins; responsive to stresses including: heat, ethanol, and sodium arsenite; involved in [PSI <sup>+</sup> ] propagation |
| YJR085C | None   |                                                                                                                                                                                                                                                               |
| YFR053C | HXK1   | Hexokinase isoenzyme 1, cytosolic protein that catalyzes phosphorylation of glucose during glucose metabolism, expression is highest during growth on non-glucose carbon sources and is repressed by Hxk2p                                                    |
| YER067W | None   |                                                                                                                                                                                                                                                               |
| YCR030C | SYP1   | Protein with a potential role in actin cytoskeletal organization; overexpression suppresses a <i>pfy1</i> (profilin) null mutation                                                                                                                            |
| YLR327C | None   |                                                                                                                                                                                                                                                               |
| YGR149W | None   |                                                                                                                                                                                                                                                               |
| YDR230W | None   |                                                                                                                                                                                                                                                               |
| YIL033C | BCY1   | Regulatory subunit of the cyclic AMP-dependent protein kinase                                                                                                                                                                                                 |

|         |       |                                                                                                                                                                                                                                |
|---------|-------|--------------------------------------------------------------------------------------------------------------------------------------------------------------------------------------------------------------------------------|
|         |       | (PKA), a component of a signaling pathway that controls a variety of cellular processes, including metabolism, cell cycle, stress response, stationary phase, and sporulation                                                  |
| YOR136W | IDH2  | Subunit of mitochondrial NAD(+)-dependent isocitrate dehydrogenase, which catalyzes the oxidation of isocitrate to alpha-ketoglutarate in the TCA cycle                                                                        |
| YBR097W | VPS15 | Myristoylated Serine/threonine protein kinase involved in vacuolar protein sorting                                                                                                                                             |
| YCR075C | ERS1  | Protein with similarity to human cystinosin, which is a H(+)-driven transporter involved in L-cystine export from lysosomes and implicated in the disease cystinosin; contains seven transmembrane domains                     |
| YKL066W | None  |                                                                                                                                                                                                                                |
| YIL124W | AYR1  | NADPH-dependent 1-acyl dihydroxyacetone phosphate reductase found in lipid particles and ER; involved in phosphatidic acid biosynthesis and required for spore germination; capable of metabolizing mammalian steroid hormones |
| YOL063C | HUS1  | Protein of unknown function                                                                                                                                                                                                    |
| YGR255C | COQ6  | Putative flavin-dependent monooxygenase, involved in ubiquinone (Coenzyme Q) biosynthesis; located on the matrix side of the mitochondrial inner membrane                                                                      |
| YBR149W | ARA1  | Large subunit of NADP+ dependent arabinose dehydrogenase, involved in carbohydrate metabolism; small subunit is unidentified                                                                                                   |
| YBR137W | None  |                                                                                                                                                                                                                                |
| YLR284C | ECI1  | Peroxisomal delta3,delta2-enoyl-CoA isomerase, hexameric protein that converts 3-hexenoyl-CoA to trans-2-hexenoyl-CoA, essential for the beta-oxidation of unsaturated fatty acids, oleate-induced                             |
| YHR092C | HXT4  | High-affinity glucose transporter of the major facilitator superfamily, expression is induced by low levels of glucose and repressed by high levels of glucose                                                                 |
| YMR315W | None  |                                                                                                                                                                                                                                |
| YMR155W | None  |                                                                                                                                                                                                                                |
| YJL005W | CYR1  | Required for START A of cell cycle, and glucose and nitrogen repression of sporulation; adenylate cyclase                                                                                                                      |
| YGR223C | HSV2  | Phosphatidylinositol 3,5-bisphosphate-binding protein, predicted to fold as a seven-bladed beta-propeller; displays punctate cytoplasmic localization                                                                          |
| YGL104C | VPS73 | None                                                                                                                                                                                                                           |
| YBL064C | PRX1  | Mitochondrial peroxiredoxin (1-Cys Prx) with thioredoxin peroxidase activity, has a role in reduction of hydroperoxides; induced during respiratory growth and under conditions of oxidative stress                            |
| YFR057W | None  |                                                                                                                                                                                                                                |
| YCR011C | ADP1  | Shows homology to ATP-dependent permeases; Active transport ATPase                                                                                                                                                             |
| YOR386W | PHR1  | photolyase                                                                                                                                                                                                                     |
| YKL036C | None  |                                                                                                                                                                                                                                |

|         |       |                                                                                                                                                                                                                                           |
|---------|-------|-------------------------------------------------------------------------------------------------------------------------------------------------------------------------------------------------------------------------------------------|
| YPL203W | TPK2  | Involved in nutrient control of cell growth and division; cAMP-dependent protein kinase catalytic subunit                                                                                                                                 |
| YKL067W | YNK1  | Nucleoside diphosphate kinase, catalyzes the phosphorylation of nucleoside diphosphates into the corresponding triphosphates for nucleic acid biosynthesis                                                                                |
| YJR020W | None  |                                                                                                                                                                                                                                           |
| YOR374W | ALD4  | Mitochondrial aldehyde dehydrogenase that utilizes NADP+ or NAD+ equally as coenzymes; expression is glucose repressed                                                                                                                    |
| YJL214W | HXT8  | Protein of unknown function with similarity to hexose transporter family members, expression is induced by low levels of glucose and repressed by high levels of glucose                                                                  |
| YNR001C | CIT1  | citrate synthase. Nuclear encoded mitochondrial protein.                                                                                                                                                                                  |
| YHR097C | None  |                                                                                                                                                                                                                                           |
| YDR272W | GLO2  | Cytoplasmic glyoxalase II, catalyzes the hydrolysis of S-D-lactoylglutathione into glutathione and D-lactate                                                                                                                              |
| YDL106C | PHO2  | Homeobox transcription factor; regulatory targets include genes involved in phosphate metabolism; binds cooperatively with Pho4p to the PHO5 promoter; phosphorylation of Pho2p facilitates interaction with Pho4p                        |
| YER177W | BMH1  | 14-3-3 protein, major isoform; binds proteins and DNA, involved in regulation of many processes including exocytosis and vesicle transport, Ras/MAPK signaling during pseudohyphal development, rapamycin-sensitive signaling, and others |
| YGR244C | LSC2  | Beta subunit of succinyl-CoA ligase, which is a mitochondrial enzyme of the TCA cycle that catalyzes the nucleotide-dependent conversion of succinyl-CoA to succinate                                                                     |
| YJL068C | None  |                                                                                                                                                                                                                                           |
| YJL164C | TPK1  | putative catalytic subunit of cAMP-dependent protein kinase                                                                                                                                                                               |
| YPL003W | ULA1  | Protein that acts together with Uba3p to activate Rub1p before its conjugation to proteins (neddlyation), which may play a role in protein degradation                                                                                    |
| YKL035W | UGP1  | UDP-glucose pyrophosphorylase or UTP-glucose-1-phosphate uridylyltransferase, EC:2.7.7.9                                                                                                                                                  |
| YCR091W | KIN82 | Putative serine/threonine protein kinase, most similar to cyclic nucleotide-dependent protein kinase subfamily and the protein kinase C subfamily                                                                                         |
| YML110C | COQ5  | 2-hexaprenyl-6-methoxy-1,4-benzoquinone methyltransferase, involved in ubiquinone (Coenzyme Q) biosynthesis; located in mitochondria                                                                                                      |
| YDL110C | None  |                                                                                                                                                                                                                                           |
| YOR135C | None  |                                                                                                                                                                                                                                           |
| YBL015W | ACH1  | Acetyl-coA hydrolase, primarily localized to mitochondria; required for acetate utilization and for diploid pseudohyphal growth                                                                                                           |
| YMR152W | YIM1  | Mitochondrial inner membrane protease, similar to E. coli leader peptidase                                                                                                                                                                |
| YMR136W | GAT2  | Protein containing GATA family zinc finger motifs; similar to Gln3p and Dal80p; expression repressed by leucine                                                                                                                           |
| YCL040W | GLK1  | Glucokinase, catalyzes the phosphorylation of glucose at C6 in                                                                                                                                                                            |

|                              |      |                                                                                                                                                                                                                                              |
|------------------------------|------|----------------------------------------------------------------------------------------------------------------------------------------------------------------------------------------------------------------------------------------------|
|                              |      | the first irreversible step of glucose metabolism; one of three glucose phosphorylating enzymes; expression regulated by non-fermentable carbon sources                                                                                      |
| YCR004C                      | YCP4 | Protein of unknown function, has sequence and structural similarity to flavodoxins; green fluorescent protein (GFP)-fusion protein localizes to the cytoplasm in a punctate pattern                                                          |
| YDR342C                      | HXT7 | High-affinity glucose transporter of the major facilitator superfamily, nearly identical to Hxt6p, expressed at high basal levels relative to other HXTs, expression repressed by high glucose levels                                        |
| YFR015C                      | GSY1 | Glycogen synthase with similarity to Gsy2p, the more highly expressed yeast homolog; expression induced by glucose limitation, nitrogen starvation, environmental stress, and entry into stationary phase                                    |
| YOR142W                      | LSC1 | Alpha subunit of succinyl-CoA ligase, which is a mitochondrial enzyme of the TCA cycle that catalyzes the nucleotide-dependent conversion of succinyl-CoA to succinate                                                                       |
| (66) MODULE 76               |      |                                                                                                                                                                                                                                              |
| <b>Expression regulators</b> |      |                                                                                                                                                                                                                                              |
| YKL101W                      | HSL1 | Nim1p-related protein kinase that regulates the morphogenesis and septin checkpoints; associates with the assembled septin filament; required along with Hsl7p for bud neck recruitment, phosphorylation, and degradation of Swe1p           |
| YKR099W                      | BAS1 | Myb-related transcription factor involved in regulating basal and induced expression of genes of the purine and histidine biosynthesis pathways                                                                                              |
| YML027W                      | YOX1 | Homeodomain-containing transcriptional repressor, binds to Mcm1p and to early cell cycle boxes (ECBs) in the promoters of cell cycle-regulated genes expressed in M/G1 phase; expression is cell cycle-regulated; potential Cdc28p substrate |
| YIL119C                      | RPI1 | Putative transcriptional regulator; overexpression suppresses the heat shock sensitivity of wild-type RAS2 overexpression and also suppresses the cell lysis defect of an mpk1 mutation                                                      |
| YMR001C                      | CDC5 | Polo-like kinase with similarity to Xenopus Plx1 and S. pombe Plo1p; found at bud neck, nucleus and SPBs; has multiple functions in mitosis and cytokinesis through phosphorylation of substrates; may be a Cdc28p substrate                 |
| YPL256C                      | CLN2 | role in cell cycle START; G(sub)1 cyclin                                                                                                                                                                                                     |
| <b>Genotype regulators</b>   |      |                                                                                                                                                                                                                                              |
| M12_659357_674651            |      | YLR257W GSY2(1,6) HSP60(0,6) LCB5(10,6) VPS63(3,0) YPT6(0,13) RBF7 RED1(13,14) YLR264C-A RPS28B(0,5) NEJ1(7,0) PDR8(8,6) BOP2(4,6) SEC22(0,3) YLR269C DCS1(0,4) YLR271W                                                                      |
| <b>Module genes</b>          |      |                                                                                                                                                                                                                                              |
| YDR024W                      | FYV1 | Dubious open reading frame, unlikely to encode a protein; not conserved in closely related Saccharomyces species; mutation decreases survival upon exposure to K1 killer toxin                                                               |
| YLR205C                      | HMX1 | ER localized, heme-binding peroxidase involved in the degradation of heme; does not exhibit heme oxygenase activity despite similarity to heme oxygenases; expression regulated by AFT1                                                      |

|         |       |                                                                                                                                                                                                                           |
|---------|-------|---------------------------------------------------------------------------------------------------------------------------------------------------------------------------------------------------------------------------|
| YLR056W | ERG3  | C-5 sterol desaturase, catalyzes the introduction of a C-5(6) double bond into episterol, a precursor in ergosterol biosynthesis; mutants are viable, but cannot grow on non-fermentable carbon sources                   |
| YLR101C | None  |                                                                                                                                                                                                                           |
| YMR061W | RNA14 | Cleavage and polyadenylation factor I (CF I) component involved in cleavage and polyadenylation of mRNA 3' ends; bridges interaction between Rna15p and Hrp1p in the CF I complex                                         |
| YMR009W | None  |                                                                                                                                                                                                                           |
| YLR100W | ERG27 | 3-keto sterol reductase, catalyzes the last of three steps required to remove two C-4 methyl groups from an intermediate in ergosterol biosynthesis; mutants are sterol auxotrophs                                        |
| YGR060W | ERG25 | C-4 methyl sterol oxidase, catalyzes the first of three steps required to remove two C-4 methyl groups from an intermediate in ergosterol biosynthesis; mutants accumulate the sterol intermediate 4,4-dimethylzymosterol |
| YML008C | ERG6  | Delta(24)-sterol C-methyltransferase, converts zymosterol to fecosterol in the ergosterol biosynthetic pathway by methylating position C-24                                                                               |
| YNL017C | None  |                                                                                                                                                                                                                           |
| YER044C | ERG28 | Endoplasmic reticulum membrane protein, may facilitate protein-protein interactions between the Erg26p dehydrogenase and the Erg27p 3-ketoreductase and/or tether these enzymes to the ER                                 |
| YMR015C | ERG5  | C-22 sterol desaturase, a cytochrome P450 enzyme that catalyzes the formation of the C-22(23) double bond in the sterol side chain in ergosterol biosynthesis; may be a target of azole antifungal drugs                  |
| YHR039C | MSC7  | Protein of unknown function, green fluorescent protein (GFP)-fusion protein localizes to the endoplasmic reticulum; msc7 mutants are defective in directing meiotic recombination events to homologous chromatids         |
| YMR134W | None  |                                                                                                                                                                                                                           |
| YHR190W | ERG9  | Farnesyl-diphosphate farnesyl transferase (squalene synthase), joins two farnesyl pyrophosphate moieties to form squalene in the sterol biosynthesis pathway                                                              |
| YGR049W | SCM4  | Protein that suppresses ts allele of CDC4 when overexpressed                                                                                                                                                              |
| YMR202W | ERG2  | C-8 sterol isomerase, catalyzes the isomerization of the delta-8 double bond to the delta-7 position at an intermediate step in ergosterol biosynthesis                                                                   |
| YNR019W | ARE2  | Acyl-CoA:sterol acyltransferase, isozyme of Are1p; endoplasmic reticulum enzyme that contributes the major sterol esterification activity in the presence of oxygen                                                       |
| YNR043W | MVD1  | involved in the polyisoprene biosynthesis pathway; mevalonate pyrophosphate decarboxylase                                                                                                                                 |
| YHR007C | ERG11 | Lanosterol 14-alpha-demethylase, catalyzes the C-14 demethylation of lanosterol to form 4,4"-dimethyl cholesta-8,14,24-triene-3-beta-ol in the ergosterol biosynthesis pathway; member of the cytochrome P450 family      |

|         |       |                                                                                                                                                                                                                                             |
|---------|-------|---------------------------------------------------------------------------------------------------------------------------------------------------------------------------------------------------------------------------------------------|
| YIR024C | None  |                                                                                                                                                                                                                                             |
| YER145C | FTR1  | High affinity iron permease involved in the transport of iron across the plasma membrane; forms complex with Fet3p; expression is regulated by iron                                                                                         |
| YJR048W | CYC1  | Cytochrome c, isoform 1; electron carrier of the mitochondrial intermembrane space that transfers electrons from ubiquinone-cytochrome c oxidoreductase to cytochrome c oxidase during cellular respiration                                 |
| YGR235C | None  |                                                                                                                                                                                                                                             |
| YGR266W | None  |                                                                                                                                                                                                                                             |
| YGL055W | OLE1  | Fatty acid desaturase, required for monounsaturated fatty acid synthesis and for normal distribution of mitochondria                                                                                                                        |
| YEL033W | None  |                                                                                                                                                                                                                                             |
| YGR234W | YHB1  | may play a role in the oxidative stress response; Flavohemoglobin                                                                                                                                                                           |
| YML126C | ERG13 | 3-hydroxy-3-methylglutaryl-CoA (HMG-CoA) synthase, catalyzes the formation of HMG-CoA from acetyl-CoA and acetoacetyl-CoA; involved in the second step in mevalonate biosynthesis                                                           |
| YPL117C | IDI1  | Isopentenyl diphosphate:dimethylallyl diphosphate isomerase (IPP isomerase), catalyzes an essential activation step in the isoprenoid biosynthetic pathway; required for viability                                                          |
| YNL111C | CYB5  | cytochrome b5                                                                                                                                                                                                                               |
| YJL167W | ERG20 | Farnesyl pyrophosphate synthetase, has both dimethylallyltransferase and geranyltransferase activities; catalyzes the formation of C15 farnesyl pyrophosphate units for isoprenoid and sterol biosynthesis                                  |
| YMR208W | ERG12 | Mevalonate kinase, acts in the biosynthesis of isoprenoids and sterols, including ergosterol, from mevalonate                                                                                                                               |
| YML075C | HMG1  | One of two isozymes of HMG-CoA reductase that catalyzes the conversion of HMG-CoA to mevalonate, which is a rate-limiting step in sterol biosynthesis; localizes to the nuclear envelope; overproduction induces the formation of karmellae |
| YEL034W | HYP2  | Translation initiation factor eIF-5A, promotes formation of the first peptide bond; similar to and functionally redundant with Anb1p; undergoes an essential hypusination modification; expressed under aerobic conditions                  |
| YPL028W | ERG10 | Acetyl-CoA C-acetyltransferase (acetoacetyl-CoA thiolase), cytosolic enzyme that transfers an acetyl group from one acetyl-CoA molecule to another, forming acetoacetyl-CoA; involved in the first step in mevalonate biosynthesis          |
| YLL012W | YEH1  | Hypothetical ORF                                                                                                                                                                                                                            |
| YJR047C | ANB1  | Translation initiation factor eIF-5A, promotes formation of the first peptide bond; similar to and functionally redundant with Hyp2p; undergoes an essential hypusination modification; expressed under anaerobic conditions                |
| YDL086W | None  |                                                                                                                                                                                                                                             |
| YLR153C | ACS2  | one of 2 acetyl-coA synthetases in yeast; acetyl-coenzyme A synthetase                                                                                                                                                                      |
| YGL001C | ERG26 | C-3 sterol dehydrogenase, catalyzes the second of three steps                                                                                                                                                                               |

|                              |      |                                                                                                                                                                                                                                                         |
|------------------------------|------|---------------------------------------------------------------------------------------------------------------------------------------------------------------------------------------------------------------------------------------------------------|
|                              |      | required to remove two C-4 methyl groups from an intermediate in ergosterol biosynthesis                                                                                                                                                                |
| YHR072W                      | ERG7 | Lanosterol synthase, an essential enzyme that catalyzes the cyclization of squalene 2,3-epoxide, a step in ergosterol biosynthesis                                                                                                                      |
| (67) MODULE 77               |      |                                                                                                                                                                                                                                                         |
| <b>Genotype regulators</b>   |      |                                                                                                                                                                                                                                                         |
| M10_461201_464261            |      | SUI2(0,2) YJR008W TDH2(0,8) SPC1(0,1) MET3(0,24) YJR011C YJR012C GPI14(2,4) RBF22 YJR015W ILV3(1,3) ESS1(1,0) YJR018W TES1(0,1) YJR020W REC107(108,2) LSM8(0,2) YJR023C YJR024C BNA1(1,78) YJR026W                                                      |
| <b>Module genes</b>          |      |                                                                                                                                                                                                                                                         |
| YNR011C                      | PRP2 | RNA-dependent ATPase in the DEAH-box family, required for activation of the spliceosome before the first transesterification step in RNA splicing                                                                                                       |
| YJR015W                      | None |                                                                                                                                                                                                                                                         |
| (68) MODULE 78               |      |                                                                                                                                                                                                                                                         |
| <b>Expression regulators</b> |      |                                                                                                                                                                                                                                                         |
| YMR036C                      | MIH1 | <i>S. pombe</i> cdc25+ homolog; homolog of <i>S. pombe</i> cdc25                                                                                                                                                                                        |
| <b>Genotype regulators</b>   |      |                                                                                                                                                                                                                                                         |
| M5_109310_117705             |      | EDC3(0,0) YEL016C PMP2(0,0) GTT3(1,0) YEL018C-A EAF5(0,0) MMS21(1,0) YEL020C YEL020C-B TIM9(0,3) URA3(222,250) GEA2(5,1) YEL023C RIP1(1,5) YEL025C SNU13(0,1) CUP5(0,0)                                                                                 |
| <b>Module genes</b>          |      |                                                                                                                                                                                                                                                         |
| YLR420W                      | URA4 | Third step in pyrimidine biosynthesis pathway; dihydroorotase                                                                                                                                                                                           |
| YMR241W                      | YHM2 | Yeast suppressor gene of HM mutant ( <i>abf2</i> ); DNA-binding protein, mtDNA stabilizing protein, mitochondrial inner membrane protein with low homology to RIM2                                                                                      |
| YER088C                      | DOT6 | Protein of unknown function, involved in telomeric gene silencing and filamentation                                                                                                                                                                     |
| YOL126C                      | MDH2 | Cytoplasmic malate dehydrogenase, catalyzes interconversion of malate and oxaloacetate; involved in gluconeogenesis and glyoxylate cycle                                                                                                                |
| YJL130C                      | URA2 | Multifunctional carbamoylphosphate synthetase (CPSase)-aspartate transcarbamylase (ATCase) that catalyzes the two first reactions of the pyrimidine pathway; carbamoyl-phosphate synthetase, aspartate transcarbamylase, and glutamine amidotransferase |
| YOL143C                      | RIB4 | Lumazine synthase (6,7-dimethyl-8-ribityllumazine synthase, also known as DMRL synthase); catalyzes synthesis of immediate precursor to riboflavin                                                                                                      |
| YNL018C                      | None |                                                                                                                                                                                                                                                         |
| YNL065W                      | AQR1 | Plasma membrane transporter of the major facilitator superfamily that confers resistance to short-chain monocarboxylic acids and quinidine                                                                                                              |
| YKL216W                      | URA1 | The enzyme catalyzes the conversion of dihydroorotic acid to orotic acid; dihydroorotate dehydrogenase                                                                                                                                                  |
| (69) MODULE 79               |      |                                                                                                                                                                                                                                                         |

|                              |      |                                                                                                                                                                                                                                                   |
|------------------------------|------|---------------------------------------------------------------------------------------------------------------------------------------------------------------------------------------------------------------------------------------------------|
| <b>Expression regulators</b> |      |                                                                                                                                                                                                                                                   |
| YJL056C                      | ZAP1 | Zinc-regulated transcription factor, binds to zinc-responsive promoter elements to induce transcription of certain genes in the presence of zinc; regulates its own transcription; contains seven zinc-finger domains                             |
| YPL075W                      | GCR1 | Transcriptional activator of genes involved in glycolysis, functions and interacts with Gcr2p                                                                                                                                                     |
| YGL014W                      | PUF4 | member of the PUF protein family; YGL014W                                                                                                                                                                                                         |
| <b>Genotype regulators</b>   |      |                                                                                                                                                                                                                                                   |
| M10_336317_353027            |      | YJL043W GYP6(4,4) YJL045W YJL046W RTT101(1,0) YJL047C-A UBX6(0,8) YJL049W MTR4(5,11) YJL051W YJL052C-A TDH1(1,1) PEP8(2,1) TIM54(1,3) YJL055W ZAP1(10,2) YJL057C BIT61(4,2)                                                                       |
| <b>Module genes</b>          |      |                                                                                                                                                                                                                                                   |
| YAR023C                      | None |                                                                                                                                                                                                                                                   |
| YGL258W                      | None |                                                                                                                                                                                                                                                   |
| YDR284C                      | DPP1 | Diacylglycerol pyrophosphate (DGPP) phosphatase, zinc-regulated vacuolar membrane-associated lipid phosphatase, dephosphorylates DGPP to phosphatidate (PA) and Pi, then PA to diacylglycerol; involved in lipid signaling and cell metabolism    |
| YNL254C                      | None |                                                                                                                                                                                                                                                   |
| YOR387C                      | None |                                                                                                                                                                                                                                                   |
| YOL154W                      | ZPS1 | Putative GPI-anchored protein; transcription is induced under low-zinc conditions, as mediated by the Zap1p transcription factor, and at alkaline pH                                                                                              |
| YKL175W                      | ZRT3 | Vacuolar membrane zinc transporter, transports zinc from storage in the vacuole to the cytoplasm when needed; transcription is induced under conditions of zinc deficiency                                                                        |
| YIL045W                      | PIG2 | Interacts with Gsy2p; Protein with 30% identity to protein corresponding to YER054                                                                                                                                                                |
| YGL256W                      | ADH4 | Alcohol dehydrogenase type IV, dimeric enzyme demonstrated to be zinc-dependent despite sequence similarity to iron-activated alcohol dehydrogenases; transcription is induced in response to zinc deficiency; alcohol dehydrogenase isoenzyme IV |
| YPL104W                      | MSD1 | Mitochondrial aspartyl-tRNA synthetase, required for acylation of aspartyl-tRNA; yeast and bacterial aspartyl-, asparaginyl-, and lysyl-tRNA synthetases contain regions with high sequence similarity, suggesting a common ancestral gene        |
| (70) MODULE 80               |      |                                                                                                                                                                                                                                                   |
| <b>Genotype regulators</b>   |      |                                                                                                                                                                                                                                                   |
| M12_131338_131338            |      | SPO75(2,1) MMM1(104,0) YLL006W-A YLL007C DRS1(1,0) COX17(0,0) PSR1(5,8) SOF1(0,6) YEH1(4,5) PUF3(226,5) YLL014W                                                                                                                                   |
| <b>Module genes</b>          |      |                                                                                                                                                                                                                                                   |
| YLL007C                      | None |                                                                                                                                                                                                                                                   |
| YLL013C                      | PUF3 | member of the PUF protein family, which is named for the founding members, PUmilio and Fbf                                                                                                                                                        |



|                              |        |                                                                                                                                                                                                                                                 |
|------------------------------|--------|-------------------------------------------------------------------------------------------------------------------------------------------------------------------------------------------------------------------------------------------------|
| (71) MODULE 81               |        |                                                                                                                                                                                                                                                 |
| <b>Expression regulators</b> |        |                                                                                                                                                                                                                                                 |
| YDR213W                      | UPC2   | involved in sterol uptake; zinc finger transcription factor of the Zn(2)-Cys(6) binuclear cluster domain type                                                                                                                                   |
| YDL230W                      | PTP1   | phosphotyrosine-specific protein phosphatase                                                                                                                                                                                                    |
| YGL229C                      | SAP4   | Protein required for function of the Sit4p protein phosphatase, member of a family of similar proteins that form complexes with Sit4p, including Sap155p, Sap185p, and Sap190p                                                                  |
| <b>Module genes</b>          |        |                                                                                                                                                                                                                                                 |
| YOR393W                      | ERR1   | Protein of unknown function, has similarity to enolases                                                                                                                                                                                         |
| YNR073C                      | None   |                                                                                                                                                                                                                                                 |
| YCR007C                      | None   |                                                                                                                                                                                                                                                 |
| YBL095W                      | None   |                                                                                                                                                                                                                                                 |
| YJR150C                      | DAN1   | Cell wall mannoprotein with similarity to Tir1p, Tir2p, Tir3p, and Tir4p; expressed under anaerobic conditions, completely repressed during aerobic growth                                                                                      |
| YOR010C                      | TIR2   | Cold shock-induced protein of the Srp1p/Tip1p family of serine-alanine-rich proteins                                                                                                                                                            |
| YMR153C-A                    | None   |                                                                                                                                                                                                                                                 |
| (72) MODULE 83               |        |                                                                                                                                                                                                                                                 |
| <b>Expression regulators</b> |        |                                                                                                                                                                                                                                                 |
| YDR264C                      | AKR1   | Negative regulator of pheromone response pathway; required for endocytosis of pheromone receptors; involved in cell shape control; Ankyrin repeat-containing protein                                                                            |
| YJR122W                      | CAF17  | Mitochondrial protein that interacts with Ccr4p in the two-hybrid system; 3'-untranslated region contains a putative mRNA localization element common to genes encoding mitochondrial proteins                                                  |
| YER028C                      | MIG3   | Probable transcriptional repressor involved in response to toxic agents such as hydroxyurea that inhibit ribonucleotide reductase; phosphorylation by Snf1p or the Mec1p pathway inactivates Mig3p, allowing induction of damage response genes |
| YIR017C                      | MET28  | Transcriptional activator in the Cbf1p-Met4p-Met28p complex, participates in the regulation of sulfur metabolism                                                                                                                                |
| YBR150C                      | TBS1   | Probable Zn-finger protein                                                                                                                                                                                                                      |
| YCL055W                      | KAR4   | Transcription factor required for induction of KAR3 and CIK1 during mating, also required during meiosis; exists in two forms, a slower-migrating form more abundant during vegetative growth and a faster-migrating form induced by pheromone  |
| YHR099W                      | TRA1   | Histone acetyltransferase component, putative ortholog of human TRRAP which is an essential cofactor of c-Myc                                                                                                                                   |
| <b>Module genes</b>          |        |                                                                                                                                                                                                                                                 |
| YOR187W                      | TUF1   | Translation elongation factor Tu, mitochondrial                                                                                                                                                                                                 |
| YNL185C                      | MRPL19 | Mitochondrial ribosomal protein of the large subunit                                                                                                                                                                                            |
| YDR114C                      | None   |                                                                                                                                                                                                                                                 |
| YBR268W                      | MRPL37 | Mitochondrial ribosomal protein of the large subunit                                                                                                                                                                                            |
| YOR020C                      | HSP10  | Mitochondrial matrix co-chaperonin that inhibits the ATPase activity of Hsp60p, a mitochondrial chaperonin; involved in                                                                                                                         |

|           |       |                                                                                                                                                                                                                                                                 |
|-----------|-------|-----------------------------------------------------------------------------------------------------------------------------------------------------------------------------------------------------------------------------------------------------------------|
|           |       | protein folding and sorting in the mitochondria; 10 kD heat shock protein with similarity to <i>E. coli</i> groES                                                                                                                                               |
| YPR166C   | MRP2  | Mitochondrial ribosomal protein of the small subunit                                                                                                                                                                                                            |
| YCR046C   | IMG1  | Mitochondrial ribosomal protein of the small subunit, required for respiration and for maintenance of the mitochondrial genome                                                                                                                                  |
| YJL104W   | PAM16 | Constituent of the mitochondrial import motor associated with the presequence translocase, along with Ssc1p, Tim44p, Mge1p, and Pam18p; has similarity to J-domain containing proteins                                                                          |
| YLR259C   | HSP60 | Tetradecameric mitochondrial chaperonin required for ATP-dependent folding of precursor polypeptides and complex assembly; prevents aggregation and mediates protein refolding after heat shock; role in mtDNA transmission; similarity to groEL                |
| YGR181W   | TIM13 | Translocase of the inner membrane; mitochondrial intermembrane space protein mediating import and insertion of polytopic inner membrane proteins; Subunit of mitochondrial protein import machinery                                                             |
| YIL098C   | FMC1  | Mitochondrial matrix protein, required for assembly or stability at high temperature of the F1 sector of mitochondrial F1F0 ATP synthase                                                                                                                        |
| YPR099C   | None  |                                                                                                                                                                                                                                                                 |
| YLR139C   | SLS1  | Mitochondrial membrane protein required for assembly of respiratory-chain enzyme complexes III and IV; coordinates expression of mitochondrially-encoded genes; may facilitate delivery of mRNA to membrane-bound translation machinery                         |
| YDR296W   | MHR1  | Protein involved in mitochondrial homologous DNA recombination and in transcription regulation; binds to activation domains of acidic activators; presence in RNA pol II holoenzyme may help recruit an Ssn3p-active form of the holoenzyme to target promoters |
| YJL131C   | None  |                                                                                                                                                                                                                                                                 |
| YGR082W   | TOM20 | Translocase of Outer Mitochondrial membrane; 20 kDa mitochondrial outer membrane protein import receptor                                                                                                                                                        |
| YER174C   | GRX4  | Hydroperoxide and superoxide-radical responsive glutathione-dependent oxidoreductase; monothiol glutaredoxin subfamily member along with Grx3p and Grx5p; protects cells from oxidative damage                                                                  |
| YOR286W   | FMP31 | The authentic, non-tagged protein was localized to the mitochondria                                                                                                                                                                                             |
| YLL009C   | COX17 | Copper metallochaperone that shuttles copper from the cytosol to the mitochondrial intermembrane space for delivery to cytochrome c oxidase                                                                                                                     |
| YEL020W-A | TIM9  | Mitochondrial intermembrane space protein mediating import and insertion of polytopic inner membrane proteins                                                                                                                                                   |
| YPR133W-A | TOM5  | Translocase of the Outer Mitochondrial membrane; Membrane protein involved in protein translocation to the mitochondria                                                                                                                                         |
| YOR334W   | MRS2  | Mitochondrial inner membrane Mg(2+) channel, required for maintenance of intramitochondrial Mg(2+) concentrations at the correct level to support splicing of group II introns                                                                                  |
| YPL183W-A | None  |                                                                                                                                                                                                                                                                 |
| YHR005C-A | MRS11 | Essential protein of the mitochondrial intermembrane space,                                                                                                                                                                                                     |

|                              |        |                                                                                                                                                                                                                                                                  |
|------------------------------|--------|------------------------------------------------------------------------------------------------------------------------------------------------------------------------------------------------------------------------------------------------------------------|
|                              |        | forms a complex with Tim9p (TIM10 complex) that mediates insertion of hydrophobic proteins at the inner membrane, has homology to Mrs5p, which is also involved in this process                                                                                  |
| (73) MODULE 84               |        |                                                                                                                                                                                                                                                                  |
| <b>Expression regulators</b> |        |                                                                                                                                                                                                                                                                  |
| YFR009W                      | GCN20  | Positive regulator of the Gcn2p kinase activity, forms a complex with Gcn1p; proposed to stimulate Gcn2p activation by an uncharged tRNA                                                                                                                         |
| YOR337W                      | TEA1   | Mutants are defective in Ty1 Enhancer-mediated Activation; Ty1 enhancer activator                                                                                                                                                                                |
| YJR122W                      | CAF17  | Mitochondrial protein that interacts with Ccr4p in the two-hybrid system; 3'-untranslated region contains a putative mRNA localization element common to genes encoding mitochondrial proteins                                                                   |
| YDR283C                      | GCN2   | Protein kinase, phosphorylates the alpha-subunit of translation initiation factor eIF2 (Sui2p) in response to starvation; activated by uncharged tRNAs and the Gcn1p-Gcn20p complex                                                                              |
| YDR225W                      | HTA1   | One of two nearly identical (see also HTA2) histone H2A subtypes; core histone required for chromatin assembly and chromosome function; DNA damage-dependent phosphorylation by Mec1p facilitates DNA repair; acetylated by Nat4p                                |
| YKL109W                      | HAP4   | Subunit of the heme-activated, glucose-repressed Hap2p/3p/4p/5p CCAAT-binding complex, a transcriptional activator and global regulator of respiratory gene expression; provides the principal activation function of the complex                                |
| YKL109W                      | HAP4   | Subunit of the heme-activated, glucose-repressed Hap2p/3p/4p/5p CCAAT-binding complex, a transcriptional activator and global regulator of respiratory gene expression; provides the principal activation function of the complex                                |
| <b>Module genes</b>          |        |                                                                                                                                                                                                                                                                  |
| YPL097W                      | MSY1   | Tyrosyl-tRNA synthetase                                                                                                                                                                                                                                          |
| YMR193W                      | MRPL24 | Mitochondrial ribosomal protein of the large subunit                                                                                                                                                                                                             |
| YDR337W                      | MRPS28 | Mitochondrial ribosomal protein of the small subunit                                                                                                                                                                                                             |
| YNL083W                      | SAL1   | Probable transporter, member of the Ca <sup>2+</sup> -binding subfamily of the mitochondrial carrier family, with two EF-hand motifs; Pet9p and Sal1p have an overlapping function critical for viability; polymorphic in different <i>S. cerevisiae</i> strains |
| YCR003W                      | MRPL32 | Mitochondrial ribosomal protein of the large subunit                                                                                                                                                                                                             |
| YBR251W                      | MRPS5  | Mitochondrial ribosomal protein of the small subunit                                                                                                                                                                                                             |
| YLR382C                      | NAM2   | mitochondrial leucyl tRNA synthetase                                                                                                                                                                                                                             |
| YHR116W                      | COX23  | Protein that functions in mitochondrial copper homeostasis and is essential for functional cytochrome oxidase expression; homologous to COX17, localized to the mitochondrial intermembrane space                                                                |
| YPL173W                      | MRPL40 | Mitochondrial ribosomal protein of the large subunit                                                                                                                                                                                                             |
| YDR237W                      | MRPL7  | Mitochondrial ribosomal protein of the large subunit                                                                                                                                                                                                             |
| YDR375C                      | BCS1   | Protein of the mitochondrial inner membrane that functions as an ATP-dependent chaperone, required for the assembly of the cytochrome bc(1) complex from the Rip1p and Qcr10p proteins;                                                                          |

|           |        |                                                                                                                                                                                                                                              |
|-----------|--------|----------------------------------------------------------------------------------------------------------------------------------------------------------------------------------------------------------------------------------------------|
|           |        | member of the CDC48/PAS1/SEC18 ATPase family                                                                                                                                                                                                 |
| YDR494W   | RSM28  | Mitochondrial ribosomal protein of the small subunit                                                                                                                                                                                         |
| YER182W   | FMP10  | The authentic, non-tagged protein was localized to the mitochondria                                                                                                                                                                          |
| YBR120C   | CBP6   | Translational activator of COB mRNA                                                                                                                                                                                                          |
| YNL177C   | MRPL22 | Mitochondrial ribosomal protein of the large subunit                                                                                                                                                                                         |
| YBR185C   | MBA1   | Protein involved in assembly of mitochondrial respiratory complexes; may act as a receptor for proteins destined for export from the mitochondrial matrix to the inner membrane                                                              |
| YJL096W   | MRPL49 | Mitochondrial ribosomal protein of the large subunit                                                                                                                                                                                         |
| YKL138C   | MRPL31 | Mitochondrial ribosomal protein of the large subunit                                                                                                                                                                                         |
| YER058W   | PET117 | Protein required for assembly of cytochrome c oxidase                                                                                                                                                                                        |
| YDL202W   | MRPL11 | Mitochondrial ribosomal protein of the large subunit                                                                                                                                                                                         |
| YKR085C   | MRPL20 | Mitochondrial ribosomal protein of the large subunit                                                                                                                                                                                         |
| YLR204W   | QRI5   | Mitochondrial protein of unknown function                                                                                                                                                                                                    |
| YPL029W   | SUV3   | ATP-dependent RNA helicase, component of the mitochondrial degradosome along with the RNase Msu1p; the degradosome associates with the ribosome and mediates turnover of aberrant or unprocessed RNAs                                        |
| YIR021W   | MRS1   | Protein required for the splicing of two mitochondrial group I introns (BI3 in COB and AI5beta in COX1); forms a splicing complex, containing four subunits of Mrs1p and two subunits of the BI3-encoded maturase, that binds to the BI3 RNA |
| YDR175C   | RSM24  | Mitochondrial ribosomal protein of the small subunit                                                                                                                                                                                         |
| YMR286W   | MRPL33 | Mitochondrial ribosomal protein of the large subunit                                                                                                                                                                                         |
| YDR462W   | MRPL28 | Mitochondrial ribosomal protein of the large subunit                                                                                                                                                                                         |
| YNL137C   | NAM9   | Mitochondrial ribosomal protein of the small subunit; can mutate to suppress nonsense mutations in mitochondrial genes                                                                                                                       |
| YNL081C   | SWS2   | Putative mitochondrial ribosomal protein of the small subunit, has similarity to E. coli S13 ribosomal protein                                                                                                                               |
| YLR312W-A | MRPL15 | Mitochondrial ribosomal protein of the large subunit                                                                                                                                                                                         |
| YBR192W   | RIM2   | Protein of the mitochondrial carrier (MCF) family that is required for respiration; Probable carrier protein, mitochondrial                                                                                                                  |
| YDR041W   | RSM10  | Mitochondrial ribosomal protein of the small subunit, has similarity to E. coli S10 ribosomal protein; essential for viability, unlike most other mitoribosomal proteins                                                                     |
| YIL093C   | RSM25  | Mitochondrial ribosomal protein of the small subunit                                                                                                                                                                                         |
| YBR037C   | SCO1   | inner mitochondrial membrane protein                                                                                                                                                                                                         |
| YGR028W   | MSP1   | 40 kDa putative membrane-spanning ATPase                                                                                                                                                                                                     |
| YLR253W   | None   |                                                                                                                                                                                                                                              |
| YKL087C   | CYT2   | links heme covalently to apocytochrome c1; cytochrome c1 heme lyase                                                                                                                                                                          |
| YKL167C   | MRP49  | Mitochondrial ribosomal protein of the large subunit, not essential for mitochondrial translation                                                                                                                                            |
| YHR109W   | CTM1   | Cytochrome c lysine methyltransferase, trimethylates residue 72 of apo-cytochrome c (Cyc1p) in the cytosol; not required for normal respiratory growth                                                                                       |
| YGL143C   | MRF1   | Mitochondrial polypeptide chain release factor, involved in stop                                                                                                                                                                             |

|         |        |                                                                                                                                                                                                                               |
|---------|--------|-------------------------------------------------------------------------------------------------------------------------------------------------------------------------------------------------------------------------------|
|         |        | codon recognition and hydrolysis of the peptidyl-tRNA bond during mitochondrial translation; lack of MRF1 causes mitochondrial genome instability                                                                             |
| YMR158W | MRPS8  | Mitochondrial ribosomal protein of the small subunit                                                                                                                                                                          |
| YFR007W | None   |                                                                                                                                                                                                                               |
| YER087W | None   |                                                                                                                                                                                                                               |
| YJL112W | MDV1   | WD repeat protein that regulates steps in the Dnm1p-dependent process of mitochondrial fission                                                                                                                                |
| YHR147C | MRPL6  | Mitochondrial ribosomal protein of the large subunit                                                                                                                                                                          |
| YHR091C | MSR1   | Nuclear-encoded mitochondrial protein; Arginyl-tRNA synthetase                                                                                                                                                                |
| YGL107C | RMD9   | Mitochondrial protein required for sporulation                                                                                                                                                                                |
| YMR188C | MRPS17 | Mitochondrial ribosomal protein of the small subunit                                                                                                                                                                          |
| YDR322W | MRPL35 | Mitochondrial ribosomal protein of the large subunit                                                                                                                                                                          |
| YNL005C | MRP7   | Mitochondrial ribosomal protein of the large subunit                                                                                                                                                                          |
| YDL107W | MSS2   | cox1 pre-mRNA splicing factor                                                                                                                                                                                                 |
| YPR100W | MRPL51 | Mitochondrial ribosomal protein of the large subunit                                                                                                                                                                          |
| YGR062C | COX18  | Mitochondrial inner membrane protein, required for export of the Cox2p C terminus from the mitochondrial matrix to the intermembrane space during its assembly into cytochrome c oxidase; similar to Oxa2p of <i>N.crassa</i> |
| YBR262C | FMP51  | The authentic, non-tagged protein was localized to the mitochondria                                                                                                                                                           |
| YLR239C | LIP2   | Lipoyl ligase, involved in the modification of mitochondrial enzymes by the attachment of lipoic acid groups                                                                                                                  |
| YGR165W | MRPS35 | Mitochondrial ribosomal protein of the small subunit                                                                                                                                                                          |
| YPL118W | MRP51  | Mitochondrial ribosomal protein of the large subunit; MRP51 exhibits genetic interactions with mutations in the COX2 and COX3 mRNA 5'-untranslated leader sequences                                                           |
| YML129C | COX14  | Mitochondrial membrane protein, required for assembly of cytochrome c oxidase                                                                                                                                                 |
| YOR354C | MSC6   | Protein of unknown function, green fluorescent protein (GFP)-fusion protein localizes to mitochondria; msc6 mutants are defective in directing meiotic recombination events to homologous chromatids                          |
| YOL033W | MSE1   | Mitochondrial glutamyl-tRNA synthetase, encoded by a nuclear gene                                                                                                                                                             |
| YPL172C | COX10  | Heme A:farnesyltransferase, catalyzes the first step in the conversion of protoheme to the heme A prosthetic group required for cytochrome c oxidase activity; human ortholog is associated with mitochondrial disorders      |
| YNR020C | None   |                                                                                                                                                                                                                               |
| YKL170W | MRPL38 | Mitochondrial ribosomal protein of the large subunit; appears as two protein spots (YmL34 and YmL38) on two-dimensional SDS gels                                                                                              |
| YGL236C | MTO1   | Mitochondrial protein required for respiration in paromomycin-resistant 15S rRNA mutants; forms a heterodimer complex with Mss1p that plays a role in optimizing mitochondrial protein synthesis                              |

|           |        |                                                                                                                                                                                                                                   |
|-----------|--------|-----------------------------------------------------------------------------------------------------------------------------------------------------------------------------------------------------------------------------------|
| YBL090W   | MRP21  | Mitochondrial ribosomal protein of the large subunit; MRP21 exhibits genetic interactions with mutations in the COX2 and COX3 mRNA 5'-untranslated leader sequences                                                               |
| YMR267W   | PPA2   | Mitochondrial inorganic pyrophosphatase, required for mitochondrial function and possibly involved in energy generation from inorganic pyrophosphate                                                                              |
| YDR347W   | MRP1   | Mitochondrial ribosomal protein of the small subunit; MRP1 exhibits genetic interactions with PET122, encoding a COX3-specific translational activator, and with PET123, encoding a small subunit mitochondrial ribosomal protein |
| YPR125W   | None   |                                                                                                                                                                                                                                   |
| YKL053C-A | MDM35  | Mitochondrial Distribution and Morphology; Similar to human sequence predicted by GENSCAN                                                                                                                                         |
| YHR038W   | RRF1   | Ribosomal Recycling Factor 1; originally characterized as FIL1, a Factor for Isocitrate Lyase expression; mitochondrial ribosome recycling factor                                                                                 |
| YBL038W   | MRPL16 | Mitochondrial ribosomal protein of the large subunit                                                                                                                                                                              |
| YML009C   | MRPL39 | Mitochondrial ribosomal protein of the large subunit                                                                                                                                                                              |
| YJR113C   | RSM7   | Mitochondrial ribosomal protein of the small subunit, has similarity to E. coli S7 ribosomal protein                                                                                                                              |
| YDR511W   | ACN9   | Protein of the mitochondrial intermembrane space, required for acetate utilization and gluconeogenesis; has orthologs in higher eukaryotes                                                                                        |
| YNL122C   | None   |                                                                                                                                                                                                                                   |
| YEL050C   | RML2   | Mitochondrial ribosomal protein of the large subunit, has similarity to E. coli L2 ribosomal protein; fat21 mutant allele causes inability to utilize oleate and may interfere with activity of the Adr1p transcription factor    |
| YBR122C   | MRPL36 | Mitochondrial ribosomal protein of the large subunit; overproduction suppresses mutations in the COX2 leader peptide-encoding region                                                                                              |
| YNL073W   | MSK1   | Mitochondrial lysine-tRNA synthetase, required for import of both aminoacylated and deacylated forms of tRNA(Lys) into mitochondria                                                                                               |
| YDR116C   | MRPL1  | Mitochondrial ribosomal protein of the large subunit                                                                                                                                                                              |
| YKL195W   | MIA40  | Essential protein of the mitochondrial intermembrane space, involved in import and assembly of intermembrane space proteins                                                                                                       |
| YGL235W   | None   |                                                                                                                                                                                                                                   |
| YKR006C   | MRPL13 | Mitochondrial ribosomal protein of the large subunit, not essential for mitochondrial translation                                                                                                                                 |
| YIL070C   | MAM33  | Acidic protein of the mitochondrial matrix involved in oxidative phosphorylation; related to the human complement receptor gC1q-R                                                                                                 |
| YJL063C   | MRPL8  | Mitochondrial ribosomal protein of the large subunit                                                                                                                                                                              |
| YGR021W   | None   |                                                                                                                                                                                                                                   |
| YMR257C   | PET111 | Specific translational activator for the COX2 mRNA, located in the mitochondrial inner membrane                                                                                                                                   |
| YPL215W   | CBP3   | Protein required for assembly of ubiquinol cytochrome-c reductase complex (cytochrome bc1 complex); involved in                                                                                                                   |

|         |        |                                                                                                                                                                                                                                                   |
|---------|--------|---------------------------------------------------------------------------------------------------------------------------------------------------------------------------------------------------------------------------------------------------|
|         |        | cytochrome-c reductase assembly                                                                                                                                                                                                                   |
| YLR439W | MRPL4  | Mitochondrial ribosomal protein of the large subunit                                                                                                                                                                                              |
| YNL315C | ATP11  | Molecular chaperone, required for the assembly of alpha and beta subunits into the F1 sector of mitochondrial F1F0 ATP synthase                                                                                                                   |
| YBR282W | MRPL27 | Mitochondrial ribosomal protein of the large subunit                                                                                                                                                                                              |
| YMR157C | FMP39  | The authentic, non-tagged protein was localized to the mitochondria                                                                                                                                                                               |
| YHR059W | FYV4   | Protein of unknown function, required for survival upon exposure to K1 killer toxin                                                                                                                                                               |
| YGL069C | SRF3   | Dubious open reading frame, unlikely to encode a protein; not conserved in closely related <i>Saccharomyces</i> species; 92% of ORF overlaps the uncharacterized ORF YGL068W; deletion in <i>cyr1</i> mutant results in loss of stress resistance |
| YER078C | None   |                                                                                                                                                                                                                                                   |
| YJL046W | None   |                                                                                                                                                                                                                                                   |
| YKL169C | None   |                                                                                                                                                                                                                                                   |
| YGL129C | RSM23  | Mitochondrial ribosomal protein of the small subunit, has similarity to mammalian apoptosis mediator proteins; null mutation prevents induction of apoptosis by overproduction of metacaspase Mca1p                                               |
| YNR040W | None   |                                                                                                                                                                                                                                                   |
| YOR266W | PNT1   | Involved in targeting of proteins to the mitochondrial inner membrane; Pentamidine resistance protein; involved in pentamidine resistance protein                                                                                                 |
| YNL284C | MRPL10 | Mitochondrial ribosomal protein of the large subunit; appears as two protein spots (YmL10 and YmL18) on two-dimensional SDS gels                                                                                                                  |
| YNL306W | MRPS18 | Mitochondrial ribosomal protein of the small subunit; essential for viability, unlike most other mitoribosomal proteins                                                                                                                           |
| YJL180C | ATP12  | Molecular chaperone, required for the assembly of alpha and beta subunits into the F1 sector of mitochondrial F1F0 ATP synthase                                                                                                                   |
| YGR076C | MRPL25 | Mitochondrial ribosomal protein of the large subunit                                                                                                                                                                                              |
| YGR084C | MRP13  | Mitochondrial ribosomal protein of the small subunit                                                                                                                                                                                              |
| YBR146W | MRPS9  | Mitochondrial ribosomal protein of the small subunit                                                                                                                                                                                              |
| YDR316W | OMS1   | None                                                                                                                                                                                                                                              |
| YGL068W | MNP1   | Putative mitochondrial-nucleoid specific ribosomal protein; Protein required for cell viability                                                                                                                                                   |
| YHL004W | MRP4   | Mitochondrial ribosomal protein of the small subunit                                                                                                                                                                                              |
| YML087C | None   |                                                                                                                                                                                                                                                   |
| YOR158W | PET123 | Mitochondrial ribosomal protein of the small subunit; PET123 exhibits genetic interactions with PET122, which encodes a COX3 mRNA-specific translational activator                                                                                |
| YLR008C | PAM18  | Constituent of the mitochondrial import motor associated with the presequence translocase, along with Ssc1p, Tim44p, Mge1p, and Pam16p; stimulates the ATPase activity of Ssc1p to drive mitochondrial import; contains a J domain                |
| YNL184C | None   |                                                                                                                                                                                                                                                   |

|                              |        |                                                                                                                                                                                                     |
|------------------------------|--------|-----------------------------------------------------------------------------------------------------------------------------------------------------------------------------------------------------|
| YCR024C                      | None   |                                                                                                                                                                                                     |
| YOL071W                      | EMI5   | Non-essential protein of unknown function required for transcriptional induction of the early meiotic-specific transcription factor IME1, also required for sporulation                             |
| YMR098C                      | None   |                                                                                                                                                                                                     |
| YER050C                      | RSM18  | Mitochondrial ribosomal protein of the small subunit, has similarity to E. coli S18 ribosomal protein                                                                                               |
| YDR194C                      | MSS116 | Mitochondrial RNA helicase of the DEAD box family, necessary for splicing of several mitochondrial introns                                                                                          |
| YNL252C                      | MRPL17 | Mitochondrial ribosomal protein of the large subunit                                                                                                                                                |
| YGR220C                      | MRPL9  | Mitochondrial ribosomal protein of the large subunit                                                                                                                                                |
| YLR069C                      | MEF1   | mitochondrial elongation factor G-like protein                                                                                                                                                      |
| YHR011W                      | DIA4   | Probable mitochondrial seryl-tRNA synthetase, mutant displays increased invasive and pseudohyphal growth                                                                                            |
| YMR166C                      | None   |                                                                                                                                                                                                     |
| YHR198C                      | FMP22  | The authentic, non-tagged protein was localized to the mitochondria                                                                                                                                 |
| YDR430C                      | CYM1   | Cytosolic metalloprotease; computational analysis of large-scale protein-protein interaction data suggests a possible role in pyruvate metabolism                                                   |
| YJR101W                      | RSM26  | Mitochondrial ribosomal protein of the small subunit                                                                                                                                                |
| YOR150W                      | MRPL23 | Mitochondrial ribosomal protein of the large subunit                                                                                                                                                |
| YOL023W                      | IFM1   | Mitochondrial translation initiation factor 2                                                                                                                                                       |
| YGR169C                      | PUS6   | RNA:Psi-synthase                                                                                                                                                                                    |
| YMR024W                      | MRPL3  | Mitochondrial ribosomal protein of the large subunit                                                                                                                                                |
| YKL194C                      | MST1   | mitochondrial threonine-tRNA synthetase                                                                                                                                                             |
| (74) MODULE 85               |        |                                                                                                                                                                                                     |
| <b>Expression regulators</b> |        |                                                                                                                                                                                                     |
| YBR158W                      | AMN1   | Involved in daughter cell separation and Chromosome STability; Chromosome STability                                                                                                                 |
| YJL098W                      | SAP185 | Protein that forms a complex with the Sit4p protein phosphatase and is required for its function; member of a family of similar proteins including Sap4p, Sap155p, and Sap190p                      |
| <b>Genotype regulators</b>   |        |                                                                                                                                                                                                     |
| M5_553222_568734             |        | ECM32(5,17) BMH1(0,3) PDA1(0,1) DMC1(44,9) ISC10(6,4) SLO1(0,9) YER181C FMP10(2,4) FAU1(1,31) YER184C YER185W YER186C YER186W-A YER187W YER188C-A YER188W YER189W YER190C-A YER190C-B YRF1-2(809,5) |
| <b>Module genes</b>          |        |                                                                                                                                                                                                     |
| YLL065W                      | None   |                                                                                                                                                                                                     |
| YDR543C                      | None   |                                                                                                                                                                                                     |
| YKL225W                      | None   |                                                                                                                                                                                                     |
| YNL337W                      | None   |                                                                                                                                                                                                     |
| YNR077C                      | None   |                                                                                                                                                                                                     |
| YER188W                      | None   |                                                                                                                                                                                                     |
| YJR162C                      | None   |                                                                                                                                                                                                     |



|                              |       |                                                                                                                                                                                                                                                 |
|------------------------------|-------|-------------------------------------------------------------------------------------------------------------------------------------------------------------------------------------------------------------------------------------------------|
| YFL063W                      | None  |                                                                                                                                                                                                                                                 |
| (75) MODULE 86               |       |                                                                                                                                                                                                                                                 |
| <b>Expression regulators</b> |       |                                                                                                                                                                                                                                                 |
| YJL089W                      | SIP4  | Possibly involved in Snf1p regulated transcriptional activation; shows homology to DNA binding domain of Gal4p, has a leucine zipper motif and acidic region; lexA-Sip4p activates transcription                                                |
| YGL037C                      | PNC1  | NAD(+) salvage pathway gene; pyrazinamidase and nicotinamidase                                                                                                                                                                                  |
| YPL204W                      | HRR25 | Similar to YCK1 and YCK2, two other casein kinase I isoforms; found primarily in nucleus; may be involved in DNA-damage repair; casein kinase I isoform                                                                                         |
| YJL089W                      | SIP4  | Possibly involved in Snf1p regulated transcriptional activation; shows homology to DNA binding domain of Gal4p, has a leucine zipper motif and acidic region; lexA-Sip4p activates transcription                                                |
| YDR259C                      | YAP6  | Basic leucine zipper (bZIP) transcription factor                                                                                                                                                                                                |
| <b>Genotype regulators</b>   |       |                                                                                                                                                                                                                                                 |
| M3_79091_92391               |       | YCL012C YCL012W YCL013W BUD3(10,152) DCC1(2,9) NFS1(40,7) LEU2(246,526) YCL019W YCL020W YCL021W YCL021W-A YCL022C YCL023C KCC4(6,2) AGP1(6,1) YCL026C FRM2(1,3) YCL026C-B FUS1(0,1) RNQ1(0,0) BIK1(0,0) YCLX06C YCLX07W YCLX08C YCLX09W YCLX10C |
| <b>Module genes</b>          |       |                                                                                                                                                                                                                                                 |
| YGL138C                      | None  |                                                                                                                                                                                                                                                 |
| YPL181W                      | CTI6  | Protein that relieves transcriptional repression by binding to the Cyc8p-Tup1p corepressor and recruiting the SAGA complex to the repressed promoter; contains a PHD finger domain                                                              |
| YKL120W                      | OAC1  | Mitochondrial inner membrane transporter, transports oxaloacetate, sulfate, and thiosulfate; member of the mitochondrial carrier family                                                                                                         |
| YCR005C                      | CIT2  | non-mitochondrial citrate synthase                                                                                                                                                                                                              |
| YJR016C                      | ILV3  | Dihydroxyacid dehydratase, catalyzes third step in the common pathway leading to biosynthesis of branched-chain amino acids                                                                                                                     |
| YGR146C                      | None  |                                                                                                                                                                                                                                                 |
| YGL062W                      | PYC1  | converts pyruvate to oxaloacetate; pyruvate carboxylase                                                                                                                                                                                         |
| YFL021W                      | GAT1  | Transcriptional activator of genes involved in nitrogen catabolite repression, member of the GATA family of DNA binding proteins; activity and localization regulated by nitrogen limitation and Ure2p                                          |
| YOR226C                      | ISU2  | Conserved protein of the mitochondrial matrix, required for synthesis of mitochondrial and cytosolic iron-sulfur proteins, performs a scaffolding function in mitochondria during Fe/S cluster assembly; isu1 isu2 double mutant is inviable    |
| YLR348C                      | DIC1  | Mitochondrial dicarboxylate carrier, integral membrane protein, catalyzes a dicarboxylate-phosphate exchange across the inner mitochondrial membrane, transports cytoplasmic dicarboxylates into the mitochondrial matrix                       |

|                              |       |                                                                                                                                                                                                                                                  |
|------------------------------|-------|--------------------------------------------------------------------------------------------------------------------------------------------------------------------------------------------------------------------------------------------------|
| YGL010W                      | None  |                                                                                                                                                                                                                                                  |
| YOR375C                      | GDH1  | NADP(+)-dependent glutamate dehydrogenase, synthesizes glutamate from ammonia and alpha-ketoglutarate; rate of alpha-ketoglutarate utilization differs from Gdh3p; expression regulated by nitrogen and carbon sources                           |
| YKL030W                      | None  |                                                                                                                                                                                                                                                  |
| YOR225W                      | None  |                                                                                                                                                                                                                                                  |
| YOR271C                      | None  |                                                                                                                                                                                                                                                  |
| YKR071C                      | DRE2  | Protein of unknown function; mutation displays synthetic lethal interaction with the pol3-13 allele of CDC2                                                                                                                                      |
| YAL062W                      | GDH3  | NADP(+)-dependent glutamate dehydrogenase, synthesizes glutamate from ammonia and alpha-ketoglutarate; rate of alpha-ketoglutarate utilization differs from Gdh1p; expression regulated by nitrogen and carbon sources                           |
| YCL017C                      | NFS1  | Required for the post-transcriptional thio-modification of both mitochondrial and cytoplasmic tRNAs, also functions in mitochondrial iron-sulfur cluster biogenesis; NifS-like protein                                                           |
| YGL009C                      | LEU1  | Isopropylmalate isomerase, catalyzes the second step in the leucine biosynthesis pathway                                                                                                                                                         |
| YER073W                      | ALD5  | Mitochondrial aldehyde dehydrogenase that is activated by K <sup>+</sup> and utilizes NADP <sup>+</sup> as the preferred coenzyme                                                                                                                |
| YBR068C                      | BAP2  | High-affinity leucine permease, functions as a branched-chain amino acid permease involved in the uptake of leucine, isoleucine and valine; contains 12 predicted transmembrane domains                                                          |
| YLR149C                      | None  |                                                                                                                                                                                                                                                  |
| YKL029C                      | MAE1  | Mitochondrial malic enzyme, catalyzes the oxidative decarboxylation of malate to pyruvate, which is a key intermediate in sugar metabolism and a precursor for synthesis of several amino acids                                                  |
| YMR108W                      | ILV2  | Acetolactate synthase, localizes in the mitochondria; expression of the gene is under general amino acid control                                                                                                                                 |
| YPL269W                      | KAR9  | Karyogamy protein required for correct positioning of the mitotic spindle and for orienting cytoplasmic microtubules, localizes at the shmoo tip in mating cells and at the tip of the growing bud in small-budded cells through anaphase        |
| YHR208W                      | BAT1  | Mitochondrial branched-chain amino acid aminotransferase, homolog of murine ECA39; highly expressed during logarithmic phase and repressed during stationary phase                                                                               |
| (76) MODULE 87               |       |                                                                                                                                                                                                                                                  |
| <b>Expression regulators</b> |       |                                                                                                                                                                                                                                                  |
| YMR179W                      | SPT21 | Protein required for normal transcription at several loci including HTA2-HTB2 and HHF2-HHT2, but not required at the other histone loci; functionally related to Spt10p                                                                          |
| YMR019W                      | STB4  | Protein that binds Sin3p in a two-hybrid assay                                                                                                                                                                                                   |
| YKL032C                      | IXR1  | Protein that binds DNA containing intrastrand cross-links formed by cisplatin, contains two HMG (high mobility group box) domains, which confer the ability to bend cisplatin-modified DNA; mediates aerobic transcriptional repression of COX5b |

|                     |      |                                                                                                                                                                                                                                                |
|---------------------|------|------------------------------------------------------------------------------------------------------------------------------------------------------------------------------------------------------------------------------------------------|
| YHL028W             | WSC4 | cell wall integrity and stress response component 4; Putative integral membrane protein containing novel cysteine motif. Similarity to SLG1 (WSC1), WSC2 and WSC3                                                                              |
| YDR224C             | HTB1 | One of two nearly identical (see HTB2) histone H2B subtypes required for chromatin assembly and chromosome function; Rad6p-Bre1p-Lge1p mediated ubiquitination regulates transcriptional activation, meiotic DSB formation and H3 methylation  |
| YCL055W             | KAR4 | Transcription factor required for induction of KAR3 and CIK1 during mating, also required during meiosis; exists in two forms, a slower-migrating form more abundant during vegetative growth and a faster-migrating form induced by pheromone |
| YBL052C             | SAS3 | Protein involved in silencing at HMR                                                                                                                                                                                                           |
| <b>Module genes</b> |      |                                                                                                                                                                                                                                                |
| YDR112W             | None |                                                                                                                                                                                                                                                |
| YIL130W             | None |                                                                                                                                                                                                                                                |
| YDL070W             | BDF2 | Protein involved in transcription initiation at TATA-containing promoters; associates with the basal transcription factor TFIID; contains two bromodomains; corresponds to the C-terminal region of mammalian TAF1; redundant with Bdf1p       |
| YBR049C             | REB1 | RNA polymerase I enhancer binding protein; DNA binding protein which binds to genes transcribed by both RNA polymerase I and RNA polymerase II; required for termination of RNA polymerase I transcription                                     |
| YOL149W             | DCP1 | Decapping enzyme, essential phosphoprotein component of mRNA decapping complex, plays key role in mRNA decay by cleaving off the 5' cap to leave the end susceptible to exonucleolytic degradation; regulated by DEAD box protein Dhh1p        |
| YLR183C             | TOS4 | Transcription factor that binds to a number of promoter regions, particularly promoters of some genes involved in pheromone response and cell cycle; potential Cdc28p substrate; expression is induced in G1 by bound SBF                      |
| YKL101W             | HSL1 | Nim1p-related protein kinase that regulates the morphogenesis and septin checkpoints; associates with the assembled septin filament; required along with Hsl7p for bud neck recruitment, phosphorylation, and degradation of Swe1p             |
| YDR111C             | ALT2 | putative alanine transaminase (glutamyl pyruvic transaminase)                                                                                                                                                                                  |
| YPL256C             | CLN2 | role in cell cycle START; G(sub)1 cyclin                                                                                                                                                                                                       |
| YJL187C             | SWE1 | Protein kinase that regulates the G2/M transition by inhibition of Cdc28p kinase activity; localizes to the nucleus and to the daughter side of the mother-bud neck; homolog of S. pombe Wee1p; potential Cdc28p substrate                     |
| YML053C             | None |                                                                                                                                                                                                                                                |
| YDL003W             | MCD1 | Essential protein required for sister chromatid cohesion in mitosis and meiosis; subunit of the cohesin complex; expression is cell cycle regulated and peaks in S phase                                                                       |
| YPL255W             | BBP1 | Protein required for the spindle pole body (SPB) duplication, localized at the central plaque periphery; forms a complex with a nuclear envelope protein Mps2p and SPB components Spc29p                                                       |

|                              |       |                                                                                                                                                                                                                                                                                                                                                                                                                                                                                                         |
|------------------------------|-------|---------------------------------------------------------------------------------------------------------------------------------------------------------------------------------------------------------------------------------------------------------------------------------------------------------------------------------------------------------------------------------------------------------------------------------------------------------------------------------------------------------|
|                              |       | and Kar1p; required for mitotic functions of Cdc5p                                                                                                                                                                                                                                                                                                                                                                                                                                                      |
| YMR075W                      | RCO1  | Hypothetical ORF                                                                                                                                                                                                                                                                                                                                                                                                                                                                                        |
| YPL032C                      | SVL3  | Protein of unknown function, mutant phenotype suggests a potential role in vacuolar function; green fluorescent protein (GFP)-fusion protein localizes to the cell periphery, cytoplasm, bud, and bud neck                                                                                                                                                                                                                                                                                              |
| YPL153C                      | RAD53 | Protein kinase, required for cell-cycle arrest in response to DNA damage; activated by trans autophosphorylation when interacting with hyperphosphorylated Rad9p                                                                                                                                                                                                                                                                                                                                        |
| YJR053W                      | BFA1  | Component of the GTPase-activating Bfa1p-Bub2p complex involved in multiple cell cycle checkpoint pathways that control exit from mitosis                                                                                                                                                                                                                                                                                                                                                               |
| YMR001C                      | CDC5  | Polo-like kinase with similarity to Xenopus Plx1 and S. pombe Plo1p; found at bud neck, nucleus and SPBs; has multiple functions in mitosis and cytokinesis through phosphorylation of substrates; may be a Cdc28p substrate                                                                                                                                                                                                                                                                            |
| YMR032W                      | HOF1  | Bud neck-localized, SH3 domain-containing protein required for cytokinesis; regulates actomyosin ring dynamics and septin localization; interacts with the formins, Bni1p and Bnr1p, and with Cyk3p, Vrp1p, and Bni5p                                                                                                                                                                                                                                                                                   |
| (77) MODULE 89               |       |                                                                                                                                                                                                                                                                                                                                                                                                                                                                                                         |
| <b>Genotype regulators</b>   |       |                                                                                                                                                                                                                                                                                                                                                                                                                                                                                                         |
| M12_450041_508029            |       | YLR149C-A STM1(0,0) PCD1(0,2) YLR152C ACS2(2,0) RNH203(0,3) YLR154C-G YLR154C-H TAR1(0,0) YLR154W-B YLR154W-C YLR154W-E YLR154W-F ASP3-1(193,529) YLR156C-A YLR156W ASP3-2(193,524) YLR157C-C YLR157W-A YLR157W-C ASP3-3(193,529) YLR159C-A YLR159W ASP3-4(193,529) YLR161W YLR162W YLR162W-A YLR162W- MAS1(3,5) YLR163W-A YLR164W PUS5(3,1) SEC10(7,11) RPS31(0,11) YLR168C YLR169W APS1(1,2) YLR171W DPH5(0,5) YLR173W IDP2(0,3) CBF5(1,2) RFX1(13,11) YLR177W TFS1(1,3) YLR179C SAM1(0,10) VTA1(4,4) |
| <b>Module genes</b>          |       |                                                                                                                                                                                                                                                                                                                                                                                                                                                                                                         |
| YLR179C                      | None  |                                                                                                                                                                                                                                                                                                                                                                                                                                                                                                         |
| YLR151C                      | PCD1  | Peroxisomal nudix pyrophosphatase with specificity for coenzyme A and CoA derivatives, may function to remove potentially toxic oxidized CoA disulfide from peroxisomes to maintain the capacity for beta-oxidation of fatty acids                                                                                                                                                                                                                                                                      |
| YIL066C                      | RNR3  | Ribonucleotide-diphosphate reductase (RNR), large subunit; the RNR complex catalyzes the rate-limiting step in dNTP synthesis and is regulated by DNA replication and DNA damage checkpoint pathways via localization of the small subunits                                                                                                                                                                                                                                                             |
| YJL026W                      | RNR2  | Ribonucleotide-diphosphate reductase (RNR), small subunit; the RNR complex catalyzes the rate-limiting step in dNTP synthesis and is regulated by DNA replication and DNA damage checkpoint pathways via localization of the small subunits                                                                                                                                                                                                                                                             |
| (78) MODULE 90               |       |                                                                                                                                                                                                                                                                                                                                                                                                                                                                                                         |
| <b>Expression regulators</b> |       |                                                                                                                                                                                                                                                                                                                                                                                                                                                                                                         |
| YOR090C                      | PTC5  | Phosphatase type Two C; Type 2C Protein Phosphatase                                                                                                                                                                                                                                                                                                                                                                                                                                                     |

|                              |       |                                                                                                                                                                                                                             |
|------------------------------|-------|-----------------------------------------------------------------------------------------------------------------------------------------------------------------------------------------------------------------------------|
| YHR056C                      | RSC30 | RSC complex component                                                                                                                                                                                                       |
| <b>Module genes</b>          |       |                                                                                                                                                                                                                             |
| YER098W                      | UBP9  | Ubiquitin-specific protease that cleaves ubiquitin-protein fusions                                                                                                                                                          |
| YPL083C                      | SEN54 | Subunit of the tRNA splicing endonuclease, which is composed of Sen2p, Sen15p, Sen34p, and Sen54p                                                                                                                           |
| YOR162C                      | YRR1  | Zn <sup>2</sup> -Cys <sup>6</sup> zinc-finger transcription factor that activates genes involved in multidrug resistance; paralog of Yrm1p, acting on an overlapping set of target genes                                    |
| YPR121W                      | THI22 | Protein with similarity to hydroxymethylpyrimidine phosphate kinases; member of a gene family with THI20 and THI21; not required for thiamine biosynthesis                                                                  |
| YNL105W                      | None  |                                                                                                                                                                                                                             |
| YBR178W                      | None  |                                                                                                                                                                                                                             |
| YJL150W                      | None  |                                                                                                                                                                                                                             |
| YGL088W                      | None  |                                                                                                                                                                                                                             |
| (79) MODULE 93               |       |                                                                                                                                                                                                                             |
| <b>Expression regulators</b> |       |                                                                                                                                                                                                                             |
| YAL017W                      | PSK1  | One of two (see also PSK2) PAS domain containing S/T protein kinases; coordinately regulates protein synthesis and carbohydrate metabolism and storage in response to a unknown metabolite that reflects nutritional status |
| <b>Genotype regulators</b>   |       |                                                                                                                                                                                                                             |
| M12_1042072_1054302          |       | HMG2(4,5) LEU3(6,0) SST2(2,0) RIF2(6,6) FMP27(8,6) YLR455W YLR456W NBP1(2,5) YLR458W GAB1(1,5) YLR460C PAU4(1,435)                                                                                                          |
| <b>Module genes</b>          |       |                                                                                                                                                                                                                             |
| YGL157W                      | None  |                                                                                                                                                                                                                             |
| YLR438W                      | CAR2  | ornithine aminotransferase                                                                                                                                                                                                  |
| YCR105W                      | ADH7  | NADP(H)-dependent alcohol dehydrogenase; ORF                                                                                                                                                                                |
| YGL263W                      | COS12 | Protein of unknown function, member of a family of conserved, often subtelomerically-encoded proteins                                                                                                                       |
| YCR106W                      | RDS1  | Regulator of drug sensitivity; transcriptional regulator                                                                                                                                                                    |
| YOL165C                      | AAD15 | Putative aryl-alcohol dehydrogenase with similarity to P. chrysosporium aryl-alcohol dehydrogenase; mutational analysis has not yet revealed a physiological role                                                           |
| YCR107W                      | AAD3  | Putative aryl-alcohol dehydrogenase with similarity to P. chrysosporium aryl-alcohol dehydrogenase; mutational analysis has not yet revealed a physiological role                                                           |
| (80) MODULE 94               |       |                                                                                                                                                                                                                             |
| <b>Expression regulators</b> |       |                                                                                                                                                                                                                             |
| YNL239W                      | LAP3  | Aminopeptidase of cysteine protease family, has a DNA binding activity and acts as bleomycin hydrolase in vitro; transcription is regulated by galactose via Gal4p                                                          |
| YPL002C                      | SNF8  | appears to be functionally related to SNF7; involved in glucose derepression                                                                                                                                                |
| <b>Genotype regulators</b>   |       |                                                                                                                                                                                                                             |
| M14_486861_486861            |       | RPL16B(8,0) TOM7(0,3) LAT1(1,0) RNH201(0,0) MSK1(1,0) MLF3(4,0) IMP4(0,1) MKS1(1,0) APJ1(1,1) NIS1(1,0)                                                                                                                     |

|                            |       |                                                                                                                                                                                                                                                |
|----------------------------|-------|------------------------------------------------------------------------------------------------------------------------------------------------------------------------------------------------------------------------------------------------|
|                            |       | TPM1(0,0) YNL080C                                                                                                                                                                                                                              |
| <b>Module genes</b>        |       |                                                                                                                                                                                                                                                |
| YDR089W                    | None  |                                                                                                                                                                                                                                                |
| YCR048W                    | ARE1  | Acyl-CoA:sterol acyltransferase, isozyme of Are2p; endoplasmic reticulum enzyme that contributes the major sterol esterification activity in the absence of oxygen                                                                             |
| YGL209W                    | MIG2  | Involved in repression, along with Mig1p, of SUC2 (invertase) expression by high levels of glucose; binds to Mig1p-binding sites in SUC2 promoter; Protein containing zinc fingers very similar to zinc fingers in Mig1p                       |
| YJL052W                    | TDH1  | Glyceraldehyde-3-phosphate dehydrogenase 1                                                                                                                                                                                                     |
| YPR157W                    | None  |                                                                                                                                                                                                                                                |
| YJR009C                    | TDH2  | glyceraldehyde 3-phosphate dehydrogenase                                                                                                                                                                                                       |
| YOR383C                    | FIT3  | Mannoprotein that is incorporated into the cell wall via a glycosylphosphatidylinositol (GPI) anchor, involved in the retention of siderophore-iron in the cell wall                                                                           |
| YKL060C                    | FBA1  | Fructose 1,6-bisphosphate adolase, required for glycolysis and gluconeogenesis                                                                                                                                                                 |
| YEL047C                    | None  |                                                                                                                                                                                                                                                |
| YFR009W                    | GCN20 | Positive regulator of the Gcn2p kinase activity, forms a complex with Gcn1p; proposed to stimulate Gcn2p activation by an uncharged tRNA                                                                                                       |
| YBR196C                    | PGI1  | Glycolytic enzyme phosphoglucose isomerase, catalyzes the interconversion of glucose-6-phosphate and fructose-6-phosphate; required for cell cycle progression and completion of the gluconeogenic events of sporulation                       |
| YNL046W                    | None  |                                                                                                                                                                                                                                                |
| YOR230W                    | WTM1  | WD repeat containing transcriptional modulator 1;<br>Transcriptional modulator                                                                                                                                                                 |
| (81) MODULE 95             |       |                                                                                                                                                                                                                                                |
| <b>Module genes</b>        |       |                                                                                                                                                                                                                                                |
| YDR345C                    | HXT3  | Low affinity glucose transporter of the major facilitator superfamily, expression is induced in low or high glucose conditions                                                                                                                 |
| (82) MODULE 97             |       |                                                                                                                                                                                                                                                |
| <b>Genotype regulators</b> |       |                                                                                                                                                                                                                                                |
| M8_80014_95469             |       | RPL14B(43,144) YHL002C-A HSE1(1,3) LAG1(1,4) MRP4(0,2) YHL005C SHU1(2,2) YHL006W-A STE20(7,2) YHL008C YAP3(10,400) YHL010C PRS3(0,3) YHL012W YHL013C YLF2(0,0) RPS20(0,0) YHL015W-A DUR3(0,3) YHL017W                                          |
| <b>Module genes</b>        |       |                                                                                                                                                                                                                                                |
| YHL010C                    | None  |                                                                                                                                                                                                                                                |
| YCL055W                    | KAR4  | Transcription factor required for induction of KAR3 and CIK1 during mating, also required during meiosis; exists in two forms, a slower-migrating form more abundant during vegetative growth and a faster-migrating form induced by pheromone |
| YJL113W                    | None  |                                                                                                                                                                                                                                                |

|                              |       |                                                                                                                                                                                                                                                                     |
|------------------------------|-------|---------------------------------------------------------------------------------------------------------------------------------------------------------------------------------------------------------------------------------------------------------------------|
| YLR452C                      | SST2  | Protein involved in desensitization to alpha-factor pheromone; member of the RGS (regulator of G-protein signalling) family; GTPase-activating protein                                                                                                              |
| YHL009C                      | YAP3  | bZIP transcription factor                                                                                                                                                                                                                                           |
| YHL022C                      | SPO11 | Meiosis-specific protein that initiates meiotic recombination by catalyzing the formation of double-strand breaks in DNA via a transesterification reaction; required for homologous chromosome pairing and synaptonemal complex formation                          |
| (83) MODULE 99               |       |                                                                                                                                                                                                                                                                     |
| <b>Expression regulators</b> |       |                                                                                                                                                                                                                                                                     |
| YFR009W                      | GCN20 | Positive regulator of the Gcn2p kinase activity, forms a complex with Gcn1p; proposed to stimulate Gcn2p activation by an uncharged tRNA                                                                                                                            |
| YOL113W                      | SKM1  | Serine/threonine protein kinase with similarity to Ste20p and Cla4p                                                                                                                                                                                                 |
| YJL005W                      | CYR1  | Required for START A of cell cycle, and glucose and nitrogen repression of sporulation; adenylate cyclase                                                                                                                                                           |
| YPL016W                      | SWI1  | Global transcription activator that acts in complex with Snf2p, Snf5p, Snf6p, and Swi3p to assist gene-specific activators; involved in the regulation of expression of many genes, including ADH1, ADH2, GAL1, HO, INO1 and SUC2; Zinc-finger transcription factor |
| <b>Module genes</b>          |       |                                                                                                                                                                                                                                                                     |
| YBR044C                      | TCM62 | mitochondrial protein; (putative) chaperone                                                                                                                                                                                                                         |
| YIL022W                      | TIM44 | 48.8 kDa protein involved in mitochondrial protein import                                                                                                                                                                                                           |
| YJR122W                      | CAF17 | Mitochondrial protein that interacts with Ccr4p in the two-hybrid system; 3'-untranslated region contains a putative mRNA localization element common to genes encoding mitochondrial proteins                                                                      |
| YOL166C                      | None  |                                                                                                                                                                                                                                                                     |
| YOR201C                      | PET56 | Ribose methyltransferase that modifies a functionally critical, conserved nucleotide in mitochondrial 21S rRNA                                                                                                                                                      |
| YPL140C                      | MKK2  | Member of MAP kinase pathway involving PKC1, BCK1, and SLT2. Shows functional redundancy with MKK1; protein kinase                                                                                                                                                  |
| YHR099W                      | TRA1  | Histone acetyltransferase component, putative ortholog of human TRRAP which is an essential cofactor of c-Myc                                                                                                                                                       |
| YGL215W                      | CLG1  | cyclin-like protein that interacts with Pho85p in affinity chromatography; cyclin-like protein that interacts with Pho85                                                                                                                                            |
| YMR316C-A                    | None  |                                                                                                                                                                                                                                                                     |
| YBR227C                      | MCX1  | Mitochondrial ATP-binding protein, possibly a mitochondrial chaperone with non-proteolytic function; similar to bacterial ClpX proteins                                                                                                                             |
| YMR316W                      | DIA1  | Protein of unknown function, involved in invasive and pseudohyphal growth; green fluorescent protein (GFP)-fusion protein localizes to the cytoplasm in a punctate pattern                                                                                          |
| YFL016C                      | MDJ1  | Protein involved in folding of mitochondrially synthesized proteins in the mitochondrial matrix; localizes to the mitochondrial inner membrane; member of the DnaJ family of molecular chaperones                                                                   |
| YLR193C                      | None  |                                                                                                                                                                                                                                                                     |

|                              |        |                                                                                                                                                                                                                                                  |
|------------------------------|--------|--------------------------------------------------------------------------------------------------------------------------------------------------------------------------------------------------------------------------------------------------|
| YHR217C                      | None   |                                                                                                                                                                                                                                                  |
| YDR393W                      | SHE9   | Mitochondrial inner membrane protein required for normal mitochondrial morphology, may be involved in fission of the inner membrane; forms a homo-oligomeric complex                                                                             |
| YPR047W                      | MSF1   | Mitochondrial phenylalanyl-tRNA synthetase alpha subunit, active as a monomer, unlike the cytoplasmic subunit which is active as a dimer complexed to a beta subunit dimer; similar to the alpha subunit of E. coli phenylalanyl-tRNA synthetase |
| (84) MODULE 100              |        |                                                                                                                                                                                                                                                  |
| <b>Expression regulators</b> |        |                                                                                                                                                                                                                                                  |
| YJL098W                      | SAP185 | Protein that forms a complex with the Sit4p protein phosphatase and is required for its function; member of a family of similar proteins including Sap4p, Sap155p, and Sap190p                                                                   |
| YIL101C                      | XBP1   | Transcriptional repressor that binds to promoter sequences of the cyclin genes, CYS3, and SMF2; expression is induced by stress or starvation during mitosis, and late in meiosis; member of the Swi4p/Mbp1p family; potential Cdc28p substrate  |
| <b>Module genes</b>          |        |                                                                                                                                                                                                                                                  |
| YPL262W                      | FUM1   | Fumarase, converts fumaric acid to L-malic acid in the TCA cycle; cytosolic and mitochondrial localization determined by the N-terminal mitochondrial targeting sequence and protein conformation                                                |
| YGL158W                      | RCK1   | Serine/threonine protein kinase                                                                                                                                                                                                                  |
| YGR279C                      | SCW4   | Cell wall protein with similarity to glucanases; scw4 scw10 double mutants exhibit defects in mating                                                                                                                                             |
| YPL275W                      | None   |                                                                                                                                                                                                                                                  |
| YDR247W                      | VHS1   | Gene whose overexpression suppresses the synthetic lethality of the hal3 sit4 double mutation                                                                                                                                                    |
| YDR529C                      | QCR7   | ubiquinol-cytochrome c oxidoreductase subunit 7 (14 kDa)                                                                                                                                                                                         |
| YPL276W                      | None   |                                                                                                                                                                                                                                                  |
| YPR156C                      | TPO3   | Polyamine transport protein                                                                                                                                                                                                                      |
| YOR388C                      | FDH1   | NAD(+)-dependent formate dehydrogenase, may protect cells from exogenous formate                                                                                                                                                                 |
| YKL123W                      | None   |                                                                                                                                                                                                                                                  |
| YAR053W                      | None   |                                                                                                                                                                                                                                                  |
| YMR304C-A                    | None   |                                                                                                                                                                                                                                                  |
| YPR193C                      | HPA2   | Tetrameric histone acetyltransferase with similarity to Gcn5p, Hat1p, Elp3p, and Hpa3p; acetylates histones H3 and H4 in vitro and exhibits autoacetylation activity                                                                             |
| (85) MODULE 101              |        |                                                                                                                                                                                                                                                  |
| <b>Genotype regulators</b>   |        |                                                                                                                                                                                                                                                  |
| M5_109310_117705             |        | EDC3(0,0) YEL016C PMP2(0,0) GTT3(1,0) YEL018C-A EAF5(0,0) MMS21(1,0) YEL020C YEL020C-B TIM9(0,3) URA3(222,250) GEA2(5,1) YEL023C RIP1(1,5) YEL025C SNU13(0,1) CUP5(0,0)                                                                          |
| <b>Module genes</b>          |        |                                                                                                                                                                                                                                                  |
| YIL171W                      | None   |                                                                                                                                                                                                                                                  |
| YEL021W                      | URA3   | orotidine-5'-phosphate decarboxylase                                                                                                                                                                                                             |



|                              |       |                                                                                                                                                                                                                                                 |
|------------------------------|-------|-------------------------------------------------------------------------------------------------------------------------------------------------------------------------------------------------------------------------------------------------|
| YMR011W                      | HXT2  | High-affinity glucose transporter of the major facilitator superfamily, expression is induced by low levels of glucose and repressed by high levels of glucose                                                                                  |
| YEL038W                      | UTR4  | Protein of unknown function, found in both the cytoplasm and nucleus                                                                                                                                                                            |
| (86) MODULE 102              |       |                                                                                                                                                                                                                                                 |
| <b>Genotype regulators</b>   |       |                                                                                                                                                                                                                                                 |
| M13_905780_922268            |       | YMR310C GLC8(0,3) ELP6(1,3) TGL3(1,5) PRE5(0,5) YMR315W YMR315W-A YMR316C-A YMR316C-B DIA1(1,4) YMR317W ADH6(0,8) FET4(1,8) YMR320W YMR321C SNO4(1,20) ERR3 YMR324C YMR325W YMR326C                                                             |
| <b>Module genes</b>          |       |                                                                                                                                                                                                                                                 |
| YMR319C                      | FET4  | Low-affinity Fe(II) transporter of the plasma membrane                                                                                                                                                                                          |
| (87) MODULE 108              |       |                                                                                                                                                                                                                                                 |
| <b>Expression regulators</b> |       |                                                                                                                                                                                                                                                 |
| YGL166W                      | CUP2  | Copper-binding transcription factor; activates transcription of the metallothionein genes CUP1-1 and CUP1-2 in response to elevated copper concentrations                                                                                       |
| YIR017C                      | MET28 | Transcriptional activator in the Cbf1p-Met4p-Met28p complex, participates in the regulation of sulfur metabolism                                                                                                                                |
| <b>Module genes</b>          |       |                                                                                                                                                                                                                                                 |
| YJL065C                      | DLS1  | Subunit of ISW2/yCHRAC chromatin accessibility complex along with Itc1p, Isw2p, and Dpb4p; involved in inheritance of telomeric silencing                                                                                                       |
| YJR071W                      | None  |                                                                                                                                                                                                                                                 |
| YDL009C                      | None  |                                                                                                                                                                                                                                                 |
| YBR278W                      | DPB3  | Third-largest subunit of DNA polymerase II (DNA polymerase epsilon), required to maintain fidelity of chromosomal replication and also for inheritance of telomeric silencing; mRNA abundance peaks at the G1/S boundary of the cell cycle      |
| YGR242W                      | None  |                                                                                                                                                                                                                                                 |
| YCR063W                      | BUD31 | Protein involved in bud-site selection; diploid mutants display a random budding pattern instead of the wild-type bipolar pattern                                                                                                               |
| (88) MODULE 109              |       |                                                                                                                                                                                                                                                 |
| <b>Expression regulators</b> |       |                                                                                                                                                                                                                                                 |
| YIL101C                      | XBP1  | Transcriptional repressor that binds to promoter sequences of the cyclin genes, CYS3, and SMF2; expression is induced by stress or starvation during mitosis, and late in meiosis; member of the Swi4p/Mbp1p family; potential Cdc28p substrate |
| YPR070W                      | MED1  | Subunit 1 of the Mediator complex essential for transcriptional regulation                                                                                                                                                                      |
| <b>Module genes</b>          |       |                                                                                                                                                                                                                                                 |
| YIR020W-B                    | None  |                                                                                                                                                                                                                                                 |
| YOR032C                      | HMS1  | C2H2 zinc-finger protein with similarity to myc-family transcription factors; overexpression confers hyperfilamentous growth and suppresses the pseudohyphal filamentation defect of a diploid mep1 mep2 homozygous null mutant                 |
| YOR107W                      | RGS2  | Negative regulator of glucose-induced cAMP signaling; directly                                                                                                                                                                                  |

|                              |       |                                                                                                                                                                                                                                            |
|------------------------------|-------|--------------------------------------------------------------------------------------------------------------------------------------------------------------------------------------------------------------------------------------------|
|                              |       | activates the GTPase activity of the heterotrimeric G protein alpha subunit Gpa2p                                                                                                                                                          |
| YGR108W                      | CLB1  | Involved in mitotic induction; G(sub)2-specific B-type cyclin                                                                                                                                                                              |
| YBR072W                      | HSP26 | Small heat shock protein with chaperone activity that is regulated by a heat induced transition from an inactive oligomeric (24-mer) complex to an active dimer; induced by heat, upon entry into stationary phase, and during sporulation |
| YER103W                      | SSA4  | member of 70 kDa heat shock protein family                                                                                                                                                                                                 |
| YHL028W                      | WSC4  | cell wall integrity and stress response component 4; Putative integral membrane protein containing novel cysteine motif. Similarity to SLG1 (WSC1), WSC2 and WSC3                                                                          |
| YIL059C                      | None  |                                                                                                                                                                                                                                            |
| YKL051W                      | SFK1  | Suppressor of PI Four Kinase                                                                                                                                                                                                               |
| YER038C                      | KRE29 | Essential protein of unknown function; heterozygous mutant shows haploinsufficiency in K1 killer toxin resistance                                                                                                                          |
| YIL119C                      | RPI1  | Putative transcriptional regulator; overexpression suppresses the heat shock sensitivity of wild-type RAS2 overexpression and also suppresses the cell lysis defect of an mpk1 mutation                                                    |
| YNL202W                      | SPS19 | late sporulation specific gene which may function during spore wall formation; peroxisomal 2,4-dienoyl-CoA reductase                                                                                                                       |
| (89) MODULE 111              |       |                                                                                                                                                                                                                                            |
| <b>Expression regulators</b> |       |                                                                                                                                                                                                                                            |
| YDL064W                      | UBC9  | SUMO-conjugating enzyme involved in the Smt3p conjugation pathway; nuclear protein required for S- and M-phase cyclin degradation and mitotic control; involved in proteolysis mediated by the anaphase-promoting complex cyclosome (APCC) |
| <b>Genotype regulators</b>   |       |                                                                                                                                                                                                                                            |
| M10_646911_646911            |       | NNF1(0,0) YJR112W-A RSM7(0,0) SRF2(1,0) YJR115W YJR116W STE24(2,2) ILM1(1,0) YJR119C YJR120W ATP2(1,0) CAF17(0,2) RPS5(0,1) YJR124C ENT3(0,0)                                                                                              |
| <b>Module genes</b>          |       |                                                                                                                                                                                                                                            |
| YJR095W                      | SFC1  | Mitochondrial succinate-fumarate transporter, transports succinate into and fumarate out of the mitochondrion; required for ethanol and acetate utilization                                                                                |
| YJR131W                      | MNS1  | specific alpha-mannosidase                                                                                                                                                                                                                 |
| YFL061W                      | DDI2  | Hypothetical ORF                                                                                                                                                                                                                           |
| YNL333W                      | SNZ2  | Snooze: stationary phase-induced gene family; member of the stationary phase-induced gene family                                                                                                                                           |
| YFL060C                      | SNO3  | Protein of unknown function, nearly identical to Sno2p; expression is induced before the diauxic shift and also in the absence of thiamin                                                                                                  |
| YFL059W                      | SNZ3  | Snooze: stationary phase-induced gene family; member of the stationary phase-induced gene family                                                                                                                                           |
| (90) MODULE 117              |       |                                                                                                                                                                                                                                            |
| <b>Genotype regulators</b>   |       |                                                                                                                                                                                                                                            |
| M14_314883_330368            |       | YNL158W ASI2(0,0) YGP1(3,1) CBK1(3,1) RPL42A(1,2) YNL162W-A RIA1(1,3) IBD2(0,0) YNL165W BNI5(133,2) SKO1(1,0) FMP41(0,1) PSD1(0,0) YNL170W YNL171C                                                                                         |

|                            |      |                                                                                                                                                                                                                                     |
|----------------------------|------|-------------------------------------------------------------------------------------------------------------------------------------------------------------------------------------------------------------------------------------|
|                            |      | APC1(4,1) MDG1(1,1) YNL174W NOP13(1,3) YNL176C                                                                                                                                                                                      |
| <b>Module genes</b>        |      |                                                                                                                                                                                                                                     |
| YNL179C                    | SRF6 | Dubious open reading frame, unlikely to encode a protein; not conserved in closely related <i>Saccharomyces</i> species; deletion in <i>cyr1</i> mutant results in loss of stress resistance                                        |
| (91) MODULE 119            |      |                                                                                                                                                                                                                                     |
| <b>Genotype regulators</b> |      |                                                                                                                                                                                                                                     |
| M11_354466_354466          |      | PTM1(17,1) NFU1(0,1) VPS24(1,0) SPC42(1,2) PHD1(1,1) YKL044W PRI2(1,6) DCW1(0,6) YKL047W ELM1(0,0) CSE4(0,0)                                                                                                                        |
| <b>Module genes</b>        |      |                                                                                                                                                                                                                                     |
| YKL043W                    | PHD1 | protein similar to StuA of <i>Aspergillus nidulans</i> ; putative transcription factor                                                                                                                                              |
| (92) MODULE 121            |      |                                                                                                                                                                                                                                     |
| <b>Genotype regulators</b> |      |                                                                                                                                                                                                                                     |
| M10_22213_34098            |      | NUC1(1,2) CBP1(6,3) PEX2(1,6) YJL211C OPT1(3,6) YJL213W HXT8(93,12) YJL215C YJL216C YJL217W YJL218W HXT9(12,50) YJL220W FSP2(4,32) VTH2(323,435)                                                                                    |
| <b>Module genes</b>        |      |                                                                                                                                                                                                                                     |
| YJL221C                    | FSP2 | Protein of unknown function, expression is induced during nitrogen limitation                                                                                                                                                       |
| YJL218W                    | None |                                                                                                                                                                                                                                     |
| (93) MODULE 122            |      |                                                                                                                                                                                                                                     |
| <b>Genotype regulators</b> |      |                                                                                                                                                                                                                                     |
| M16_70847_70853            |      | GYP5(1,2) RPL36B(5,6) ICY2(1,12) YPL250W-A YPL251W YAH1(1,2) VIK1(4,3) HFI1(1,3) BBP1(0,4) CLN2(1,3) YPL257W                                                                                                                        |
| <b>Module genes</b>        |      |                                                                                                                                                                                                                                     |
| YPL252C                    | YAH1 | Iron-sulfur protein of the mitochondrial matrix, homologous to human adrenodoxin; involved in heme biosynthesis                                                                                                                     |
| (94) MODULE 124            |      |                                                                                                                                                                                                                                     |
| <b>Genotype regulators</b> |      |                                                                                                                                                                                                                                     |
| M6_134096_161065           |      | DEG1(3,5) SPB4(2,5) YFL002W-A MSH4(5,187) VTC2(2,4) SEC4(1,3) YFL006W BLM3(10,3) LOC1(0,49) NIC96(2,3) YPI1(0,3) RPN11(0,3) SAD1(5,3) YFR006W YFR007W FAR7(2,1) GCN20(1,13) YFR009W-A UBP6(0,2) YFR010W-A YFR011C YFR012W YFR012W-A |
| <b>Module genes</b>        |      |                                                                                                                                                                                                                                     |
| YFL010C                    | WWM1 | WW domain containing protein interacting with Metacaspase (MCA1)                                                                                                                                                                    |
| YFL011W-A                  | None |                                                                                                                                                                                                                                     |
| (95) MODULE 125            |      |                                                                                                                                                                                                                                     |
| <b>Genotype regulators</b> |      |                                                                                                                                                                                                                                     |
| M15_968429_968429          |      | UBC11(0,0) RPA43(1,3) RPA190(2,3) YOR342C YOR343C TYE7(0,0)                                                                                                                                                                         |
| <b>Module genes</b>        |      |                                                                                                                                                                                                                                     |
| YOR345C                    | None |                                                                                                                                                                                                                                     |

|                            |      |                                                                                                                                                                                                                                  |
|----------------------------|------|----------------------------------------------------------------------------------------------------------------------------------------------------------------------------------------------------------------------------------|
| YOR346W                    | REV1 | Deoxycytidyl transferase, forms a complex with the subunits of DNA polymerase zeta, Rev3p and Rev7p; involved in repair of abasic sites in damaged DNA                                                                           |
| (96) MODULE 126            |      |                                                                                                                                                                                                                                  |
| <b>Genotype regulators</b> |      |                                                                                                                                                                                                                                  |
| M12_131338_131338          |      | SPO75(2,1) MMM1(104,0) YLL006W-A YLL007C DRS1(1,0) COX17(0,0) PSR1(5,8) SOF1(0,6) YEH1(4,5) PUF3(226,5) YLL014W                                                                                                                  |
| <b>Module genes</b>        |      |                                                                                                                                                                                                                                  |
| YGR144W                    | THI4 | Protein required for thiamine biosynthesis and for mitochondrial genome stability                                                                                                                                                |
| (97) MODULE 128            |      |                                                                                                                                                                                                                                  |
| <b>Genotype regulators</b> |      |                                                                                                                                                                                                                                  |
| M4_1344550_1344670         |      | PPZ2(1,0) YDR437W YDR438W LRS4(0,0) DOT1(2,10) APT2(1,6) YDR442W SSN2(4,1) YDR444W YDR445C ECM11(0,156)                                                                                                                          |
| <b>Module genes</b>        |      |                                                                                                                                                                                                                                  |
| YDR451C                    | YHP1 | acts as a repressor at early cell cycle boxes (ECBs) to restrict their activity to the M/G1 phase of the cell cycle.                                                                                                             |
| YDR441C                    | APT2 | Apparent pseudogene, not transcribed or translated under normal conditions; encodes a protein with similarity to adenine phosphoribosyltransferase, but artificially expressed protein exhibits no enzymatic activity            |
| (98) MODULE 130            |      |                                                                                                                                                                                                                                  |
| <b>Genotype regulators</b> |      |                                                                                                                                                                                                                                  |
| M8_161987_176994           |      | MYO1(16,4) MAS2(0,2) THR1(1,2) PPA1(0,1) RPN1(3,8) DAP2(3,22) YHR028W-A YHR029C SLT2(0,4) RRM3(3,12) YHR032C-A YHR032W YHR032W-A YHR033W PIH1(4,6) YHR035W YHR036W PUT2(2,1) RRF1(2,10) MSC7(0,7)                                |
| <b>Module genes</b>        |      |                                                                                                                                                                                                                                  |
| YHR022C                    | None |                                                                                                                                                                                                                                  |
| (99) MODULE 131            |      |                                                                                                                                                                                                                                  |
| <b>Genotype regulators</b> |      |                                                                                                                                                                                                                                  |
| M15_290670_301077          |      | YOL008W MDM12(1,3) RCL1(0,2) PLB3(0,1) HTZ1(0,1) HRD1(1,2) YOL013W-A YOL013W-B YOL014W YOL015W CMK2(1,1) ESC8(5,2) TLG2(0,2) YOL019W YOL019W-A TAT2(0,2) DIS3(2,2) YOL022C                                                       |
| <b>Module genes</b>        |      |                                                                                                                                                                                                                                  |
| YOL019W                    | None |                                                                                                                                                                                                                                  |
| (100) MODULE 132           |      |                                                                                                                                                                                                                                  |
| <b>Genotype regulators</b> |      |                                                                                                                                                                                                                                  |
| M2_216978_246135           |      | ECM15(0,22) HTB2(0,13) HTA2(0,13) UTP20(35,140) PDR3(3,1) YBL005W-A YBL005W-B LDB7(2,1) YBL006W-A SLA1(9,2) HIR1(3,0) YBL008W-A YBL009W NTH2(7,4) RER2(1,2) COQ1(1,2) GPI18 RCR1(2,2) UGA2(0,5) DSF2(9,8) FLR1(5,15) HHF1(0,331) |
| <b>Module genes</b>        |      |                                                                                                                                                                                                                                  |
| YBL005W                    | PDR3 | Transcriptional activator of the pleiotropic drug resistance                                                                                                                                                                     |

|                            |      |                                                                                                                                                                                                                                              |
|----------------------------|------|----------------------------------------------------------------------------------------------------------------------------------------------------------------------------------------------------------------------------------------------|
|                            |      | network, regulates expression of ATP-binding cassette (ABC) transporters through binding to cis-acting sites known as PDREs (PDR responsive elements)                                                                                        |
| (101) MODULE 133           |      |                                                                                                                                                                                                                                              |
| <b>Genotype regulators</b> |      |                                                                                                                                                                                                                                              |
| M5_240105_244117           |      | GLN3(4,0) YEN1(4,1) MXR1(0,2) SAH1(0,1) ERG28(0,3) MEI4(95,2) ACA1(9,27) SPO73(1,14) YER046W-A SAP1(7,5) CAJ1(0,8) YER048W-A YER049W                                                                                                         |
| <b>Module genes</b>        |      |                                                                                                                                                                                                                                              |
| YER047C                    | SAP1 | Putative ATPase of the AAA family, interacts with the Sin1p transcriptional repressor in the two-hybrid system                                                                                                                               |
| (102) MODULE 134           |      |                                                                                                                                                                                                                                              |
| <b>Genotype regulators</b> |      |                                                                                                                                                                                                                                              |
| M16_368086_368296          |      | RPS6A(2,377) GLR1(3,4) SSU1(6,10) NOG1(0,3) SEC62(0,3) YPL095C ERI1(1,0) PNG1(0,0) MSY1(0,0) YPL098C FMP14(0,0) ATG21(1,0) ELP4(0,2) YPL102C FMP30(0,2)                                                                                      |
| <b>Module genes</b>        |      |                                                                                                                                                                                                                                              |
| YPL091W                    | GLR1 | Cytosolic and mitochondrial glutathione oxidoreductase, converts oxidized glutathione to reduced glutathione                                                                                                                                 |
| (103) MODULE 135           |      |                                                                                                                                                                                                                                              |
| <b>Genotype regulators</b> |      |                                                                                                                                                                                                                                              |
| M14_571885_595885          |      | PBI2(0,6) PUB1(1,20) YNL017C YNL018C YNL019C ARK1(3,10) HDA1(2,3) YNL022C FAP1(10,9) YNL024C YNL024C-A SSN8(1,8) SAM50(3,2) CRZ1(3,1) YNL028W KTR5(5,1) HHF2(0,7) HHT2(0,7) SIW14(1,13) YNL033W YNL034W YNL035C                              |
| <b>Module genes</b>        |      |                                                                                                                                                                                                                                              |
| YNL019C                    | None |                                                                                                                                                                                                                                              |
| (104) MODULE 136           |      |                                                                                                                                                                                                                                              |
| <b>Genotype regulators</b> |      |                                                                                                                                                                                                                                              |
| M2_380926_388862           |      | TIP1(6,9) BAP2(3,7) TAT1(3,3) YBR070C YBR071W YBR072C-A HSP26(2,26) RDH54(5,2) YBR074W YBR075W YBR076C-A ECM8(195,23) EGO3 ECM33(64,7) RPG1(551,164)                                                                                         |
| <b>Module genes</b>        |      |                                                                                                                                                                                                                                              |
| YBR066C                    | NRG2 | Transcriptional repressor that mediates glucose repression and negatively regulates filamentous growth; has similarity to Nrg1p                                                                                                              |
| (105) MODULE 137           |      |                                                                                                                                                                                                                                              |
| <b>Genotype regulators</b> |      |                                                                                                                                                                                                                                              |
| M10_535311_548177          |      | CYC1(0,8) UTR1(2,1) ISY1(0,1) OSM1(0,1) RAD7(0,2) BFA1(1,3) YJR054W HIT1(2,350) YJR056C CDC8(1,119) APS2(0,5) PTK2(89,5) CBF1(2,7) YJR061W NTA1(2,5) RPA12(0,5) CCT5(0,0)                                                                    |
| <b>Module genes</b>        |      |                                                                                                                                                                                                                                              |
| YJR060W                    | CBF1 | Helix-loop-helix protein that binds the motif CACRTG (R=A or G), which is present at several sites including MET gene promoters and centromere DNA element I (CDEI); required for nucleosome positioning at this motif; targets Isw1p to DNA |

|                            |      |                                                                                                                                                                                                                      |
|----------------------------|------|----------------------------------------------------------------------------------------------------------------------------------------------------------------------------------------------------------------------|
| (106) MODULE 138           |      |                                                                                                                                                                                                                      |
| <b>Genotype regulators</b> |      |                                                                                                                                                                                                                      |
| M5_44605_48845             |      | VMA8(0,5) AFG1(139,5) MAK10(1,5) YEL053W-A<br>RPL12A(0,7) POL5(9,7) HAT2(2,16) YEL057C PCM1(4,5)<br>SOM1(0,5) YEL059W PRB1(4,2) CIN8(4,4) NPR2(2,6)                                                                  |
| <b>Module genes</b>        |      |                                                                                                                                                                                                                      |
| YEL057C                    | None |                                                                                                                                                                                                                      |
| (107) MODULE 139           |      |                                                                                                                                                                                                                      |
| <b>Genotype regulators</b> |      |                                                                                                                                                                                                                      |
| M16_704388_711614          |      | YPR074W-A OPY2(1,1) YPR076W YPR077C YPR078C<br>MRL1(0,2) TEF1(0,318) GRS2(0,0) DIB1(1,0) MDM36(0,0)<br>YPR084W YPR085C SUA7(1,2) VPS69(5,0) SRP54(196,0)<br>YPR089W YPR090W YPR091C YPR092W ASR1(1,14)<br>RDS3(0,14) |
| <b>Module genes</b>        |      |                                                                                                                                                                                                                      |
| YPR085C                    | None |                                                                                                                                                                                                                      |
| (108) MODULE 140           |      |                                                                                                                                                                                                                      |
| <b>Genotype regulators</b> |      |                                                                                                                                                                                                                      |
| M15_481586_481586          |      | RTS2(2,1) BUD21(1,1) ATX2(0,1) DIA2(11,1) STC2(0,3)<br>YOR082C WHI5(0,4) YOR084W OST3(0,2) TCB1(547,473)<br>YVC1(2,7) YOR088W VPS21(0,5)                                                                             |
| <b>Module genes</b>        |      |                                                                                                                                                                                                                      |
| YOR081C                    | STC2 | Protein of unknown function, localizes to lipid particles;<br>potential Cdc28p substrate                                                                                                                             |
| (109) MODULE 141           |      |                                                                                                                                                                                                                      |
| <b>Genotype regulators</b> |      |                                                                                                                                                                                                                      |
| M15_290670_301077          |      | YOL008W MDM12(1,3) RCL1(0,2) PLB3(0,1) HTZ1(0,1)<br>HRD1(1,2) YOL013W-A YOL013W-B YOL014W YOL015W<br>CMK2(1,1) ESC8(5,2) TLG2(0,2) YOL019W YOL019W-A<br>TAT2(0,2) DIS3(2,2) YOL022C                                  |
| <b>Module genes</b>        |      |                                                                                                                                                                                                                      |
| YOL014W                    | None |                                                                                                                                                                                                                      |
| (110) MODULE 142           |      |                                                                                                                                                                                                                      |
| <b>Genotype regulators</b> |      |                                                                                                                                                                                                                      |
| M7_3714_23129              |      | YGL250W HFM1(22,0) RTG2(1,1) HXK2(0,11) FZF1(2,3)<br>ZRT1(27,1) ADH4(6,1) MNT2(11,1) YGL258W YGL258W-A<br>YPS5(0,2) YGL260W YGL261C YGL262W COS12(141,872)                                                           |
| <b>Module genes</b>        |      |                                                                                                                                                                                                                      |
| YGL262W                    | None |                                                                                                                                                                                                                      |
| (111) MODULE 143           |      |                                                                                                                                                                                                                      |
| <b>Genotype regulators</b> |      |                                                                                                                                                                                                                      |
| M2_424450_427683           |      | RPL19A(1,370) YBR085C-A AAC3(1,15) IST2(7,8) RFC5(0,8)<br>POL30(0,0) NHP6B(1,2) YBR089W YBR090C YBR090C-A<br>MRS5(0,6) PHO3(2,5) PHO5(1,10) YBR094W RXT2(3,1)<br>YBR096W                                             |
| <b>Module genes</b>        |      |                                                                                                                                                                                                                      |
| YBR103W                    | SIF2 | Sir4p-Interacting Factor; 535 amino acid protein containing 4                                                                                                                                                        |

|                              |      |                                                                                                                                                                                                                                                   |
|------------------------------|------|---------------------------------------------------------------------------------------------------------------------------------------------------------------------------------------------------------------------------------------------------|
|                              |      | WD-40 repeats and a nuclear localization signal                                                                                                                                                                                                   |
| (112) MODULE 144             |      |                                                                                                                                                                                                                                                   |
| <b>Genotype regulators</b>   |      |                                                                                                                                                                                                                                                   |
| M4_1213416_1213416           |      | CDC40(0,0) ESF1(0,407) YDR366C YDR367W YPR1(0,0) XRS2(2,0) YDR370C YDR371C-A CTS2(3,0) VPS74(0,1) FRQ1(0,1)                                                                                                                                       |
| <b>Module genes</b>          |      |                                                                                                                                                                                                                                                   |
| YDR367W                      | None |                                                                                                                                                                                                                                                   |
| (113) MODULE 145             |      |                                                                                                                                                                                                                                                   |
| <b>Expression regulators</b> |      |                                                                                                                                                                                                                                                   |
| YOR090C                      | PTC5 | Phosphatase type Two C; Type 2C Protein Phosphatase                                                                                                                                                                                               |
| <b>Module genes</b>          |      |                                                                                                                                                                                                                                                   |
| YLR282C                      | None |                                                                                                                                                                                                                                                   |
| (114) MODULE 146             |      |                                                                                                                                                                                                                                                   |
| <b>Genotype regulators</b>   |      |                                                                                                                                                                                                                                                   |
| M14_371953_394161            |      | DCP2(10,13) NCS2(2,2) YNL120C TOM70(1,2) YNL122C YNL123W NAF1(5,3) ESBP6(7,3) SPC98(1,0) FAR11(1,1) TEP1(1,0) NRK1(1,0) CPT1(18,1) YNL130C-A TOM22(0,0) KRE33(3,3) FYV6(1,3) YNL134C FPR1(0,2) EAF7(3,1) NAM9(1,1) SRV2(3,3) RCP10(2,0) RLR1(9,0) |
| <b>Module genes</b>          |      |                                                                                                                                                                                                                                                   |
| YNL134C                      | None |                                                                                                                                                                                                                                                   |
| (115) MODULE 147             |      |                                                                                                                                                                                                                                                   |
| <b>Genotype regulators</b>   |      |                                                                                                                                                                                                                                                   |
| M7_98231_117900              |      | MDS3(20,6) YIP4(0,3) YGL199C EMP24(0,3) MCM6(4,9) ARO8(1,144) KEX1(260,309) YGL204C POX1(7,6) CHC1(6,6) SPT16(2,10) SIP2(3,0) MIG2(1,10) YPT32(0,1) YGL210W-A NCS6(1,1) VAM7(3,0) SKI8(1,0) YGL214W CLG1(14,3)                                    |
| <b>Module genes</b>          |      |                                                                                                                                                                                                                                                   |
| YGL201C                      | MCM6 | Protein involved in DNA replication; component of the Mcm2-7 hexameric complex that binds chromatin as a part of the pre-replicative complex                                                                                                      |
| (116) MODULE 148             |      |                                                                                                                                                                                                                                                   |
| <b>Genotype regulators</b>   |      |                                                                                                                                                                                                                                                   |
| M2_477206_486640             |      | RAD16(2,9) LYS2(372,217) YBR116C TKL2(0,22) TEF2(0,20) MUD1(8,5) CBP6(0,4) GRS1(3,3) YBR121C-A MRPL36(0,5) TFC1(3,4) YBR124W PTC4(0,9) TPS1(0,1) YBR126W-A YBR126W-B VMA2(0,0) ATG14(0,0) OPY1(0,2) SHE3(1,0)                                     |
| <b>Module genes</b>          |      |                                                                                                                                                                                                                                                   |
| YBR115C                      | LYS2 | Alpha amino adipate reductase, catalyzes the reduction of alpha-amino adipate to alpha-amino adipate 6-semialdehyde, which is the fifth step in biosynthesis of lysine; activation requires posttranslational phosphopantetheinylation by Lys5p   |
| (117) MODULE 149             |      |                                                                                                                                                                                                                                                   |
| <b>Genotype regulators</b>   |      |                                                                                                                                                                                                                                                   |

|                            |      |                                                                                                                                                                                                                                              |
|----------------------------|------|----------------------------------------------------------------------------------------------------------------------------------------------------------------------------------------------------------------------------------------------|
| M14_571885_595885          |      | PBI2(0,6) PUB1(1,20) YNL017C YNL018C YNL019C<br>ARK1(3,10) HDA1(2,3) YNL022C FAP1(10,9) YNL024C<br>YNL024C-A SSN8(1,8) SAM50(3,2) CRZ1(3,1) YNL028W<br>KTR5(5,1) HHF2(0,7) HHT2(0,7) SIW14(1,13) YNL033W<br>YNL034W YNL035C                  |
| <b>Module genes</b>        |      |                                                                                                                                                                                                                                              |
| YNL040W                    | None |                                                                                                                                                                                                                                              |
| (118) MODULE 150           |      |                                                                                                                                                                                                                                              |
| <b>Genotype regulators</b> |      |                                                                                                                                                                                                                                              |
| M10_461201_464261          |      | SUI2(0,2) YJR008W TDH2(0,8) SPC1(0,1) MET3(0,24)<br>YJR011C YJR012C GPI14(2,4) RBF22 YJR015W ILV3(1,3)<br>ESS1(1,0) YJR018W TES1(0,1) YJR020W REC107(108,2)<br>LSM8(0,2) YJR023C YJR024C BNA1(1,78) YJR026W                                  |
| <b>Module genes</b>        |      |                                                                                                                                                                                                                                              |
| YJR010C-A                  | SPC1 | Subunit of the signal peptidase complex (SPC), which cleaves<br>the signal sequence from proteins targeted to the endoplasmic<br>reticulum (ER), homolog of the SPC12 subunit of mammalian<br>signal peptidase complex                       |
| (119) MODULE 151           |      |                                                                                                                                                                                                                                              |
| <b>Genotype regulators</b> |      |                                                                                                                                                                                                                                              |
| M7_592983_592983           |      | RME1(1,0) YGR045C YGR046W TFC4(1,1) UFD1(0,1)<br>SCM4(0,3) YGR050C YGR051C FMP48(0,9) YGR053C<br>YGR054W MUP1(0,6)                                                                                                                           |
| <b>Module genes</b>        |      |                                                                                                                                                                                                                                              |
| YGR050C                    | None |                                                                                                                                                                                                                                              |
| (120) MODULE 152           |      |                                                                                                                                                                                                                                              |
| <b>Genotype regulators</b> |      |                                                                                                                                                                                                                                              |
| M12_131338_131338          |      | SPO75(2,1) MMM1(104,0) YLL006W-A YLL007C DRS1(1,0)<br>COX17(0,0) PSR1(5,8) SOF1(0,6) YEH1(4,5) PUF3(226,5)<br>YLL014W                                                                                                                        |
| <b>Module genes</b>        |      |                                                                                                                                                                                                                                              |
| YLL010C                    | PSR1 | Plasma membrane associated protein phosphatase involved in<br>the general stress response; required along with binding partner<br>Whi2p for full activation of STRE-mediated gene expression,<br>possibly through dephosphorylation of Msn2p |
| (121) MODULE 153           |      |                                                                                                                                                                                                                                              |
| <b>Genotype regulators</b> |      |                                                                                                                                                                                                                                              |
| M2_133737_151686           |      | HEK2(3,6) RIB1(0,6) STU1(4,1) POL12(5,2) YBL036C<br>APL3(4,2) MRPL16(2,21) URA7(0,21) YBL039C-A<br>YBL039W-A ERD2(7,5) PRE7(23,9) FUI1(5,9) ECM13(0,2)<br>YBL044W COR1(2,5) YBL046W EDE1(5,2) YBL048W<br>MOH1(0,4) SEC17(10,4) PIN4(6,4)     |
| <b>Module genes</b>        |      |                                                                                                                                                                                                                                              |
| YBL044W                    | None |                                                                                                                                                                                                                                              |
| (122) MODULE 154           |      |                                                                                                                                                                                                                                              |
| <b>Genotype regulators</b> |      |                                                                                                                                                                                                                                              |
| M2_745748_754059           |      | FMP51(0,0) SHM1(0,0) YPT10(0,0) TSC10(1,0) SLM6<br>REI1(3,0) MRPL37(1,0) FMP21(0,3) YBR270C YBR271W                                                                                                                                          |



|                            |      |                                                                                                                                                                                                            |
|----------------------------|------|------------------------------------------------------------------------------------------------------------------------------------------------------------------------------------------------------------|
|                            |      | HSM3(4,2) UBX7(5,1) CHK1(1,1) RIF1(27,6) PPS1(4,0)<br>YBR277C DPB3(1,0) PAF1(0,0) YBR280C                                                                                                                  |
| <b>Module genes</b>        |      |                                                                                                                                                                                                            |
| YBR274W                    | CHK1 | checkpoint kinase 1; homolog of the <i>S. pombe</i> and mammalian Chk1 checkpoint kinases; Protein kinase Chk1                                                                                             |
| (123) MODULE 155           |      |                                                                                                                                                                                                            |
| <b>Genotype regulators</b> |      |                                                                                                                                                                                                            |
| M5_546664_549142           |      | RAD24(3,1) GRX4(3,2) TMT1(2,1) YER175W-A<br>ECM32(5,17) BMH1(0,3) PDA1(0,1) DMC1(44,9) ISC10(6,4)<br>SLO1(0,9) YER181C FMP10(2,4) FAU1(1,31) YER184C                                                       |
| <b>Module genes</b>        |      |                                                                                                                                                                                                            |
| YER187W                    | None |                                                                                                                                                                                                            |
| (124) MODULE 156           |      |                                                                                                                                                                                                            |
| <b>Genotype regulators</b> |      |                                                                                                                                                                                                            |
| M14_314883_330368          |      | YNL158W ASI2(0,0) YGP1(3,1) CBK1(3,1) RPL42A(1,2)<br>YNL162W-A RIA1(1,3) IBD2(0,0) YNL165W BNI5(133,2)<br>SKO1(1,0) FMP41(0,1) PSD1(0,0) YNL170W YNL171C<br>APC1(4,1) MDG1(1,1) YNL174W NOP13(1,3) YNL176C |
| <b>Module genes</b>        |      |                                                                                                                                                                                                            |
| YNL180C                    | RHO5 | Non-essential small GTPase of the Rho/Rac subfamily of Ras-like proteins, likely involved in protein kinase C (Pkc1p)-dependent signal transduction pathway that controls cell integrity                   |
| (125) MODULE 157           |      |                                                                                                                                                                                                            |
| <b>Genotype regulators</b> |      |                                                                                                                                                                                                            |
| M16_932310_932538          |      | AQY1(17,26) HPA2(1,8) OPT2(25,180) YPR195C YPR196W<br>YPR197C SGE1(0,0) ARR1(0,0) ARR2(0,0) ARR3(4,0)                                                                                                      |
| <b>Module genes</b>        |      |                                                                                                                                                                                                            |
| YPR201W                    | ARR3 | Arsenite transporter of the plasma membrane, required for resistance to arsenic compounds; transcription is activated by Arr1p in the presence of arsenite                                                 |
| (126) MODULE 158           |      |                                                                                                                                                                                                            |
| <b>Genotype regulators</b> |      |                                                                                                                                                                                                            |
| M15_338018_348934          |      | ALG6(3,0) YSP3(2,0) YOR004W DNL4(2,0) YOR006C<br>SGT2(0,7) SLG1(0,0) YOR008C-A YOR008W-B TIR4(5,2)<br>TIR2(0,1) AUS1(5,8) YOR011W-A YOR012W YOR013W<br>RTS1(2,11)                                          |
| <b>Module genes</b>        |      |                                                                                                                                                                                                            |
| YOR019W                    | None |                                                                                                                                                                                                            |
| (127) MODULE 159           |      |                                                                                                                                                                                                            |
| <b>Genotype regulators</b> |      |                                                                                                                                                                                                            |
| M15_248746_248746          |      | YOL036W YOL037C YOL038C-A PRE6(0,2) RPP2A(0,3)<br>RPS15(0,3) NOP12(4,1) NGL1(1,1) NTG2(4,1) PEX15(230,1)<br>PSK2(3,4) YOL046C YOL047C YOL048C GSH2(0,3)                                                    |
| <b>Module genes</b>        |      |                                                                                                                                                                                                            |
| YOL043C                    | NTG2 | DNA N-glycosylase and apurinic/aprimidinic (AP) lyase involved in base excision repair, localizes to the nucleus                                                                                           |
| (128) MODULE 160           |      |                                                                                                                                                                                                            |

|                            |      |                                                                                                                                                                                                                                                                                                                                                                                                           |
|----------------------------|------|-----------------------------------------------------------------------------------------------------------------------------------------------------------------------------------------------------------------------------------------------------------------------------------------------------------------------------------------------------------------------------------------------------------|
| <b>Genotype regulators</b> |      |                                                                                                                                                                                                                                                                                                                                                                                                           |
| M15_409775_439041          |      | PEP12(0,1) CYC2(2,1) HIR2(2,1) CKB2(0,1) GLO4(0,1) SRF5(2,0) CUE5(3,3) WHI2(5,7) YOR044W TOM6(0,5) DBP5(1,12) STD1(4,17) RAT1(3,31) RSB1(1,12) YOR050C YOR051C YOR052C YOR053W VHS3(12,4) YOR055W NOB1(0,3) SGT1(4,3) ASE1(5,11) YOR059C YOR060C CKA2(0,6) YOR062C RPL3(0,7) YNG1(1,1) CYT1(0,1)                                                                                                          |
| <b>Module genes</b>        |      |                                                                                                                                                                                                                                                                                                                                                                                                           |
| YOR049C                    | RSB1 | Suppressor of sphingoid long chain base (LCB) sensitivity of an LCB-lyase mutation; putative integral membrane transporter or flippase that may transport LCBs from the cytoplasmic side toward the extracytoplasmic side of the membrane                                                                                                                                                                 |
| (129) MODULE 161           |      |                                                                                                                                                                                                                                                                                                                                                                                                           |
| <b>Genotype regulators</b> |      |                                                                                                                                                                                                                                                                                                                                                                                                           |
| M4_432483_478080           |      | RMD1(0,1) NHP10(0,1) MCD1(5,22) ATP16(0,2) MED2(8,2) PTC1(0,4) RPT2(0,382) APC11(1,8) YDL009C YDL010W YDL011C YDL012C HEX3(0,1) NOP1(0,3) TSC13(1,3) YDL016C CDC7(2,0) ERP3(39,0) NTH1(0,4) YRB1(0,4) RCR2(0,5) YDR003W-A RAD57(1,3) MAF1(2,2) SOK1(0,4) TRP1(1,4) YDR008C GAL3(1,4) YDR010C SNQ2(277,9) RPL4B(0,2) PSF1(0,0) RAD61(51,0) YDR015C DAD1(0,0) KCS1(2,2) YDR018C GCV1(0,5) YDR020C FAL1(2,0) |
| <b>Module genes</b>        |      |                                                                                                                                                                                                                                                                                                                                                                                                           |
| YDL012C                    | None |                                                                                                                                                                                                                                                                                                                                                                                                           |
| (130) MODULE 162           |      |                                                                                                                                                                                                                                                                                                                                                                                                           |
| <b>Genotype regulators</b> |      |                                                                                                                                                                                                                                                                                                                                                                                                           |
| M11_354466_354466          |      | PTM1(17,1) NFU1(0,1) VPS24(1,0) SPC42(1,2) PHD1(1,1) YKL044W PRI2(1,6) DCW1(0,6) YKL047W ELM1(0,0) CSE4(0,0)                                                                                                                                                                                                                                                                                              |
| <b>Module genes</b>        |      |                                                                                                                                                                                                                                                                                                                                                                                                           |
| YKL044W                    | None |                                                                                                                                                                                                                                                                                                                                                                                                           |
| (131) MODULE 163           |      |                                                                                                                                                                                                                                                                                                                                                                                                           |
| <b>Genotype regulators</b> |      |                                                                                                                                                                                                                                                                                                                                                                                                           |
| M13_149075_159533          |      | YML053C CYB2(0,2) YML054C-A SPC2(0,3) IMD4(59,289) YML057C-A CMP2(1,7) SML1(0,1) HUG1(0,0) NTE1 OGG1(0,1) PIF1(2,1) MFT1(0,1) RPS1B(0,8) TEM1(0,8) ORC1(2,9) SMA2(2,9) ERV41(12,2)                                                                                                                                                                                                                        |
| <b>Module genes</b>        |      |                                                                                                                                                                                                                                                                                                                                                                                                           |
| YML066C                    | SMA2 | Spore Membrane Assembly                                                                                                                                                                                                                                                                                                                                                                                   |
| (132) MODULE 164           |      |                                                                                                                                                                                                                                                                                                                                                                                                           |
| <b>Genotype regulators</b> |      |                                                                                                                                                                                                                                                                                                                                                                                                           |
| M8_193175_209245           |      | RRF1(2,10) MSC7(0,7) VMA10(1,3) YHR039C-B BCD1(0,5) SRB2(6,3) NCP1(4,3) DOG2(11,284) DOG1(11,0) YHR045W INM1(1,6) AAP1'(0,0) YHR048W YHR049C-A FSH1(0,0) SMF2(49,1) YHR050W-A COX6(0,0) CIC1(5,2) YHR052W-A CUP1-1(0,7) YHR054C YHR054W-A CUP1-2(0,7) RSC30(4,1) YHR056W-A CPR2(0,3)                                                                                                                      |
| <b>Module genes</b>        |      |                                                                                                                                                                                                                                                                                                                                                                                                           |

|                            |      |                                                                                                                                                                                                                                                                                            |
|----------------------------|------|--------------------------------------------------------------------------------------------------------------------------------------------------------------------------------------------------------------------------------------------------------------------------------------------|
| YHR043C                    | DOG2 | 2-deoxyglucose-6-phosphate phosphatase, member of a family of low molecular weight phosphatases, similar to Dog1p, induced by oxidative and osmotic stress, confers 2-deoxyglucose resistance when overexpressed                                                                           |
| (133) MODULE 165           |      |                                                                                                                                                                                                                                                                                            |
| <b>Genotype regulators</b> |      |                                                                                                                                                                                                                                                                                            |
| M15_854265_880786          |      | FSH3(1,9) PLP2(4,1) YOR282W YOR283W HUA2(6,1) YOR285W FMP31(1,4) YOR287C MPD1(1,0) YOR289W SNF2(6,29) YOR291W YOR292C YOR293C-A RPS10A(17,1) RRS1(0,0) UAF30(0,0) YOR296W TIM18(1,1) MBF1(0,0) YOR298W BUD7(0,1) YOR300W RAX1(2,1) YOR302W CPA1(2,0) YOR304C-A ISW2(4,0) YOR305W MCH5(8,9) |
| <b>Module genes</b>        |      |                                                                                                                                                                                                                                                                                            |
| YOR285W                    | None |                                                                                                                                                                                                                                                                                            |
| (134) MODULE 166           |      |                                                                                                                                                                                                                                                                                            |
| <b>Genotype regulators</b> |      |                                                                                                                                                                                                                                                                                            |
| M4_1310380_1318073         |      | YDR417C RPL12B(0,346) RAD30(0,2) HKR1(861,636) ARO80(1,0) SIP1(3,1) CAD1(3,0) DYN2(16,0) SNX41(1,0) YDR426C RPN9(0,2) YDR428C TIF35(0,0) CYM1(0,0)                                                                                                                                         |
| <b>Module genes</b>        |      |                                                                                                                                                                                                                                                                                            |
| YDR423C                    | CAD1 | Transcriptional activator involved in resistance to 1,10-phenanthroline; member of yeast Jun-family of transcription factors related to mammalian c-jun; basic leucine zipper transcription factor                                                                                         |
| (135) MODULE 167           |      |                                                                                                                                                                                                                                                                                            |
| <b>Genotype regulators</b> |      |                                                                                                                                                                                                                                                                                            |
| M12_824230_824230          |      | YLR342W-A GAS2(11,6) RPL26A(6,480) YLR345W YLR346C KAP95(1,2) YLR347W-A DIC1(0,10) YLR349W ORM2(1,10) NIT3(1,21) YLR352W                                                                                                                                                                   |
| <b>Module genes</b>        |      |                                                                                                                                                                                                                                                                                            |
| YLR343W                    | GAS2 | Putative 1,3-beta-glucanosyltransferase, has similarity to Gas1p                                                                                                                                                                                                                           |
| (136) MODULE 168           |      |                                                                                                                                                                                                                                                                                            |
| <b>Genotype regulators</b> |      |                                                                                                                                                                                                                                                                                            |
| M13_245457_255564          |      | YML003W GLO1(3,12) TRM12(4,5) GIS4(3,4) YML007C-A YAP1(3,7) ERG6(1,1) MRPL39(0,5) YML009C-A YML009W-B SPT5(7,4) YML010W-A YML010C-B YML010W-B YML011C YML012C-A ERV25(1,0) SEL1(4,0) YML013C-A TRM9(91,0) TAF11(1,0) PPZ1(1,9) PSP2(6,10)                                                  |
| <b>Module genes</b>        |      |                                                                                                                                                                                                                                                                                            |
| YMR006C                    | PLB2 | Phospholipase B 2; lysophospholipase/phospholipase B                                                                                                                                                                                                                                       |
| (137) MODULE 169           |      |                                                                                                                                                                                                                                                                                            |
| <b>Genotype regulators</b> |      |                                                                                                                                                                                                                                                                                            |
| M7_98231_117900            |      | MDS3(20,6) YIP4(0,3) YGL199C EMP24(0,3) MCM6(4,9) ARO8(1,144) KEX1(260,309) YGL204C POX1(7,6) CHC1(6,6) SPT16(2,10) SIP2(3,0) MIG2(1,10) YPT32(0,1) YGL210W-A NCS6(1,1) VAM7(3,0) SKI8(1,0) YGL214W CLG1(14,3)                                                                             |
| <b>Module genes</b>        |      |                                                                                                                                                                                                                                                                                            |

|                            |      |                                                                                                                                                                                                        |
|----------------------------|------|--------------------------------------------------------------------------------------------------------------------------------------------------------------------------------------------------------|
| YGL204C                    | None |                                                                                                                                                                                                        |
| (138) MODULE 170           |      |                                                                                                                                                                                                        |
| <b>Genotype regulators</b> |      |                                                                                                                                                                                                        |
| M10_374040_387893          |      | PET130(2,2) APS3(7,5) RRN7(0,1) YJL026C-A RNR2(1,2)<br>YJL027C YJL028W VPS53(2,8) MAD2(0,2) BET4(2,2)<br>YJL032W HCA4(4,1) KAR2(0,2) TAD2(4,2) SNX4(1,18)<br>YJL037W YJL038C NUP192(3,22) NSP1(48,118) |
| <b>Module genes</b>        |      |                                                                                                                                                                                                        |
| YJL035C                    | TAD2 | tRNA-specific adenosine-34 deaminase subunit Tad2p                                                                                                                                                     |
| (139) MODULE 171           |      |                                                                                                                                                                                                        |
| <b>Genotype regulators</b> |      |                                                                                                                                                                                                        |
| M5_6335_17399              |      | HPA3(1,9) YEL067C YEL068C HXT13(4,11) DSF1(0,31)<br>DLD3(1,7) RMD6(1,14) YEL073C YEL074W YEL075C<br>YEL075W-A YEL076C YEL076C-A YEL076W-C YEL077C<br>YEL077W-A                                         |
| <b>Module genes</b>        |      |                                                                                                                                                                                                        |
| YEL073C                    | None |                                                                                                                                                                                                        |
| (140) MODULE 172           |      |                                                                                                                                                                                                        |
| <b>Genotype regulators</b> |      |                                                                                                                                                                                                        |
| M4_161196_165032           |      | YDL157C YDL158C YDL159C-B STE7(1,1) YDL159W-A<br>DHH1(0,1) YDL160C-A ENT1(0,3) YDL162C YDL163W<br>CDC9(1,3) CDC36(0,6) FAP7(0,6) NRP1(128,0) SFA1(2,12)<br>UGX2(6,13) UGA3(3,6) GLT1(5,6)              |
| <b>Module genes</b>        |      |                                                                                                                                                                                                        |
| YDL168W                    | SFA1 | Long-chain alcohol dehydrogenase (glutathione-dependent formaldehyde dehydrogenase)                                                                                                                    |
| (141) MODULE 173           |      |                                                                                                                                                                                                        |
| <b>Genotype regulators</b> |      |                                                                                                                                                                                                        |
| M13_649250_649253          |      | SGS1(4,3) SPG5(5,3) GYL1(1,10) YMR193C-A MRPL24(1,2)<br>YMR194C-A YMR194C-B RPL36A(5,2) ICY1(0,1)<br>YMR196W VTI1(0,2)                                                                                 |
| <b>Module genes</b>        |      |                                                                                                                                                                                                        |
| YMR193C-A                  | None |                                                                                                                                                                                                        |
| (142) MODULE 174           |      |                                                                                                                                                                                                        |
| <b>Genotype regulators</b> |      |                                                                                                                                                                                                        |
| M4_45364_54225             |      | CDC13(11,3) YDL221W FMP45(0,3) HBT1(485,1)<br>WHI4(370,467) SHS1(276,0) GCS1(130,0) HO(573,520)<br>YDL228C SSB1(0,0) PTP1(2,2) BRE4(2,2) OST4(0,0)<br>YDL233W                                          |
| <b>Module genes</b>        |      |                                                                                                                                                                                                        |
| YDL231C                    | BRE4 | Zinc finger protein containing five transmembrane domains; null mutant exhibits strongly fragmented vacuoles and sensitivity to brefeldin A, a drug which is known to affect intracellular transport   |
| (143) MODULE 175           |      |                                                                                                                                                                                                        |
| <b>Genotype regulators</b> |      |                                                                                                                                                                                                        |
| M11_522777_522777          |      | GAP1(1,43) YKR040C YKR041W UTH1(7,0) YKR043C                                                                                                                                                           |

|                            |      |                                                                                                                                                                                                                                                                                                                                     |
|----------------------------|------|-------------------------------------------------------------------------------------------------------------------------------------------------------------------------------------------------------------------------------------------------------------------------------------------------------------------------------------|
|                            |      | UIP5(4,0) YKR045C PET10(0,10) YKR047W NAP1(2,0)<br>FMP46(0,9) TRK2(109,7) YKR051W MRS4(1,5)                                                                                                                                                                                                                                         |
| <b>Module genes</b>        |      |                                                                                                                                                                                                                                                                                                                                     |
| YKR039W                    | GAP1 | General amino acid permease; localization to the plasma membrane is regulated by nitrogen source                                                                                                                                                                                                                                    |
| (144) MODULE 176           |      |                                                                                                                                                                                                                                                                                                                                     |
| <b>Genotype regulators</b> |      |                                                                                                                                                                                                                                                                                                                                     |
| M4_1499294_1507292         |      | YDR524C-A YDR524C-B YDR524W-A API2(1,0) SNA2(0,3)<br>YDR526C RBA50(7,3) HLR1(63,10) QCR7(0,2) APA2(0,4)<br>YDR531W YDR532C HSP31(1,13) FIT1(32,68) YDR535C<br>STL1(2,7) YDR537C PAD1(2,11) YDR539W                                                                                                                                  |
| <b>Module genes</b>        |      |                                                                                                                                                                                                                                                                                                                                     |
| YDR539W                    | None |                                                                                                                                                                                                                                                                                                                                     |
| (145) MODULE 177           |      |                                                                                                                                                                                                                                                                                                                                     |
| <b>Genotype regulators</b> |      |                                                                                                                                                                                                                                                                                                                                     |
| M12_247886_257512          |      | YLR046C YLR047C RPS0B(30,9) YLR049C YLR050C<br>YLR051C IES3(2,2) YLR053C OSW2(8,3) SPT8(8,3)<br>ERG3(2,12) YLR057W SHM2(0,4) REX2(3,2) FRS1(2,2)<br>RPL22A(4,7) BUD28(0,0) YLR063W YLR064W YLR065C<br>SPC3(0,2)                                                                                                                     |
| <b>Module genes</b>        |      |                                                                                                                                                                                                                                                                                                                                     |
| YLR049C                    | None |                                                                                                                                                                                                                                                                                                                                     |
| (146) MODULE 178           |      |                                                                                                                                                                                                                                                                                                                                     |
| <b>Genotype regulators</b> |      |                                                                                                                                                                                                                                                                                                                                     |
| M16_70847_70853            |      | GYP5(1,2) RPL36B(5,6) ICY2(1,12) YPL250W-A YPL251W<br>YAH1(1,2) VIK1(4,3) HFI1(1,3) BBP1(0,4) CLN2(1,3)<br>YPL257W                                                                                                                                                                                                                  |
| <b>Module genes</b>        |      |                                                                                                                                                                                                                                                                                                                                     |
| YPL251W                    | None |                                                                                                                                                                                                                                                                                                                                     |
| (147) MODULE 179           |      |                                                                                                                                                                                                                                                                                                                                     |
| <b>Genotype regulators</b> |      |                                                                                                                                                                                                                                                                                                                                     |
| M9_415311_420076           |      | YVH1(2,4) DAL1(2,2) DAL4(2,2) DAL2(1,4) DCG1(3,3)<br>YIR030W-A DAL7(1,2) DAL3(2,4) MGA2(15,4) LYS1(0,1)<br>YIR035C YIR036C YIR036W-A HYR1(0,3) GTT1(1,20)                                                                                                                                                                           |
| <b>Module genes</b>        |      |                                                                                                                                                                                                                                                                                                                                     |
| YIR039C                    | YPS6 | Putative GPI-anchored aspartic protease                                                                                                                                                                                                                                                                                             |
| (148) MODULE 180           |      |                                                                                                                                                                                                                                                                                                                                     |
| <b>Genotype regulators</b> |      |                                                                                                                                                                                                                                                                                                                                     |
| M13_227254_243624          |      | YML007C-A ERG6(1,1) MRPL39(0,5) YML009C-A<br>YML009W-B SPT5(7,4) YML010W-A YML010C-B<br>YML010W-B YML011C YML012C-A ERV25(1,0) SEL1(4,0)<br>YML013C-A TRM9(91,0) TAF11(1,0) PPZ1(1,9) PSP2(6,10)<br>YML018C OST6(2,0) YML020W UNG1(1,5) APT1(1,0)<br>YML023C RPS17A(1,13) YML6(10,13) RPS18B(16,5)<br>YOX1(0,5) TSA1(0,0) USA1(0,1) |
| <b>Module genes</b>        |      |                                                                                                                                                                                                                                                                                                                                     |
| YML016C                    | PPZ1 | Serine/threonine protein phosphatase Z, isoform of Ppz2p; involved in regulation of potassium transport, which affects                                                                                                                                                                                                              |

|                            |       |                                                                                                                                                                                                                                                                          |
|----------------------------|-------|--------------------------------------------------------------------------------------------------------------------------------------------------------------------------------------------------------------------------------------------------------------------------|
|                            |       | osmotic stability, cell cycle progression, and halotolerance                                                                                                                                                                                                             |
| (149) MODULE 181           |       |                                                                                                                                                                                                                                                                          |
| <b>Genotype regulators</b> |       |                                                                                                                                                                                                                                                                          |
| M9_190794_205191           |       | THS1(2,4) AIR1(3,4) YIL080W YIL082W YIL082W-A<br>YIL083C SDS3(1,4) KTR7(3,2) YIL086C YIL087C AVT7(3,3)<br>YIL089W YIL090W YIL091C YIL092W RSM25(0,5)<br>LYS12(0,2) PRK1(1,9) YIL096C FYV10(1,1)                                                                          |
| <b>Module genes</b>        |       |                                                                                                                                                                                                                                                                          |
| YIL089W                    | None  |                                                                                                                                                                                                                                                                          |
| (150) MODULE 182           |       |                                                                                                                                                                                                                                                                          |
| <b>Genotype regulators</b> |       |                                                                                                                                                                                                                                                                          |
| M16_182953_207356          |       | YPL176C CUP9(0,2) CBC2(1,339) PPQ1(1,0) TCO89(2,1)<br>CTI6(0,7) YPL182C YPL183C YPL183W-A YPL184C<br>YPL185W UIP4(1,1) MF(ALPHA)1(21,1) POS5(1,1)<br>YPL189C-A GUP2(1,4) NAB3(1,1) YPL191C PRM3(2,3)<br>RSA1(0,0) DDC1(2,0) APL5(0,1) OXR1(0,1) YPL197C<br>RPL7B(35,181) |
| <b>Module genes</b>        |       |                                                                                                                                                                                                                                                                          |
| YPL189W                    | GUP2  | Multimembrane-spanning protein and putative glycerol transporter that is essential for proton symport of glycerol; Gup1p homolog                                                                                                                                         |
| (151) MODULE 183           |       |                                                                                                                                                                                                                                                                          |
| <b>Genotype regulators</b> |       |                                                                                                                                                                                                                                                                          |
| M1_1_37068                 |       | ACS1(2,7) PEX22(3,3) YAL056C-A GPB2(10,6) CNE1(9,5)<br>YAL058C-A YAL059C-A ECM1(4,2) BDH1(6,5) YAL061W<br>GDH3(0,50) FLO9(880,506) YAL063C-A YAL064C-A<br>YAL064W YAL064W-B YAL065C YAL066W<br>SEO1(370,503) YAL067W-A YAL068C YAL068W-A<br>YAL069W                      |
| <b>Module genes</b>        |       |                                                                                                                                                                                                                                                                          |
| YAL064C-A                  | None  |                                                                                                                                                                                                                                                                          |
| (152) MODULE 184           |       |                                                                                                                                                                                                                                                                          |
| <b>Genotype regulators</b> |       |                                                                                                                                                                                                                                                                          |
| M10_509429_513451          |       | HUL4(6,3) YJR037W YJR038C YJR039W GEF1(5,5)<br>URB2(8,4) NUP85(5,4) POL32(5,9) VPS55(0,3) SSC1(1,3)<br>TAH11(2,3)                                                                                                                                                        |
| <b>Module genes</b>        |       |                                                                                                                                                                                                                                                                          |
| YJR035W                    | RAD26 | Protein involved in transcription-coupled repair nucleotide excision repair of UV-induced DNA lesions; homolog of human CSB protein                                                                                                                                      |
| (153) MODULE 186           |       |                                                                                                                                                                                                                                                                          |
| <b>Genotype regulators</b> |       |                                                                                                                                                                                                                                                                          |
| M7_985414_995892           |       | YAP1802(4,1) YGR242W FMP43(0,1) LSC2(2,3) SDA1(0,0)<br>BRF1(9,6) CPD1(2,6) SOL4(2,4) MGA1(3,20) YGR250C<br>YGR251W GCN5(0,7) PUP2(0,17) ENO1(0,4) COQ6(0,15)<br>GND2(2,15)                                                                                               |
| <b>Module genes</b>        |       |                                                                                                                                                                                                                                                                          |
| YGR247W                    | CPD1  | Cyclic nucleotide phosphodiesterase, hydrolyzes ADP-ribose 1",                                                                                                                                                                                                           |

|                            |       |                                                                                                                                                                                                                              |
|----------------------------|-------|------------------------------------------------------------------------------------------------------------------------------------------------------------------------------------------------------------------------------|
|                            |       | 2"-cyclic phosphate to ADP-ribose 1"-phosphate; no detectable phenotype is conferred by null mutation or by overexpression                                                                                                   |
| (154) MODULE 187           |       |                                                                                                                                                                                                                              |
| <b>Genotype regulators</b> |       |                                                                                                                                                                                                                              |
| M7_167587_192140           |       | YGL160W YIP5(1,2) SUT1(2,13) RAD54(2,42) YRB30(1,2) YGL165C CUP2(2,4) PMR1(4,4) HUR1(2,36) SUA5(4,8) SPO74(4,8) ROK1(3,2) NUP49(5,0) KEM1(8,2) BUD13(2,3) SAE2(1,3) YGL176C YGL177W MPT5(2,4) TOS3(1,10) ATG1(0,2) GTS1(4,1) |
| <b>Module genes</b>        |       |                                                                                                                                                                                                                              |
| YGL169W                    | SUA5  | Protein required for respiratory growth; null mutation suppresses the Cyc1p translation defect caused by the presence of an aberrant ATG codon upstream of the correct start                                                 |
| (155) MODULE 188           |       |                                                                                                                                                                                                                              |
| <b>Genotype regulators</b> |       |                                                                                                                                                                                                                              |
| M14_648788_648788          |       | ATG3(0,0) LRO1(0,0) YNR009W CSE2(3,0) PRP2(38,2) URK1(2,1) PHO91(1,2) YNR014W SMM1(0,0) ACC1(1,2)                                                                                                                            |
| <b>Module genes</b>        |       |                                                                                                                                                                                                                              |
| YNR013C                    | PHO91 | Low-affinity phosphate transporter; deletion of pho84, pho87, pho89, pho90, and pho91 causes synthetic lethality; transcription independent of Pi and Pho4p activity; overexpression results in vigorous growth              |
| (156) MODULE 189           |       |                                                                                                                                                                                                                              |
| <b>Genotype regulators</b> |       |                                                                                                                                                                                                                              |
| M9_334195_341216           |       | YIL002W-A CFD1(0,2) BET1(3,2) EPS1(0,0) YIL006W NAS2(0,0) URM1(0,6) EST3(90,13) FAA3(3,6) DOT5(4,3) TIR3(37,8) YIL012W PDR11(2,10) YIL014C-A MNT3(2,124) YIL015C-A                                                           |
| <b>Module genes</b>        |       |                                                                                                                                                                                                                              |
| YIL014W                    | MNT3  | Alpha-1,3-mannosyltransferase, adds the fourth and fifth alpha-1,3-linked mannose residues to O-linked glycans during protein O-glycosylation                                                                                |
| (157) MODULE 190           |       |                                                                                                                                                                                                                              |
| <b>Genotype regulators</b> |       |                                                                                                                                                                                                                              |
| M8_161987_176994           |       | MYO1(16,4) MAS2(0,2) THR1(1,2) PPA1(0,1) RPN1(3,8) DAP2(3,22) YHR028W-A YHR029C SLT2(0,4) RRM3(3,12) YHR032C-A YHR032W YHR032W-A YHR033W PIH1(4,6) YHR035W YHR036W PUT2(2,1) RRF1(2,10) MSC7(0,7)                            |
| <b>Module genes</b>        |       |                                                                                                                                                                                                                              |
| YHR028C                    | DAP2  | Dipeptidyl aminopeptidase, synthesized as a glycosylated precursor; localizes to the vacuolar membrane; similar to Ste13p                                                                                                    |
| (158) MODULE 191           |       |                                                                                                                                                                                                                              |
| <b>Genotype regulators</b> |       |                                                                                                                                                                                                                              |
| M3_100213_105042           |       | RER1(0,0) YCL001W-A YCL001W-B YCL002C PGS1(1,1) YCL005W VMA9(4,0) YCL006C YCL007C STP22(0,0) ILV6(1,0) SGF29(1,0) GBP2(1,0) YCL012C YCL012W YCL013W BUD3(10,152) DCC1(2,9) NFS1(40,7) LEU2(246,526) YCLX10C YCLX11W YCLX12W  |
| <b>Module genes</b>        |       |                                                                                                                                                                                                                              |

|                            |      |                                                                                                                                                                                                                                                                             |
|----------------------------|------|-----------------------------------------------------------------------------------------------------------------------------------------------------------------------------------------------------------------------------------------------------------------------------|
| YCL018W                    | LEU2 | Beta-isopropylmalate dehydrogenase, catalyzes the third step in the leucine biosynthesis pathway                                                                                                                                                                            |
| (159) MODULE 192           |      |                                                                                                                                                                                                                                                                             |
| <b>Genotype regulators</b> |      |                                                                                                                                                                                                                                                                             |
| M12_238298_246579          |      | YLR040C YLR041W YLR042C TRX1(0,0) PDC1(0,11) STU2(5,4) YLR046C YLR047C RPS0B(30,9) YLR049C YLR050C YLR051C IES3(2,2) YLR053C OSW2(8,3) SPT8(8,3) ERG3(2,12)                                                                                                                 |
| <b>Module genes</b>        |      |                                                                                                                                                                                                                                                                             |
| YLR050C                    | None |                                                                                                                                                                                                                                                                             |
| (160) MODULE 193           |      |                                                                                                                                                                                                                                                                             |
| <b>Genotype regulators</b> |      |                                                                                                                                                                                                                                                                             |
| M14_402312_412269          |      | YAF9(3,1) YNL108C YNL109W NOP15(0,2) CYB5(0,1) DBP2(1,2) RPC19(0,14) YNL114C YNL115C DMA2(5,1) MLS1(2,13) DCP2(10,13) NCS2(2,2) YNL120C TOM70(1,2) YNL122C YNL123W NAF1(5,3)                                                                                                |
| <b>Module genes</b>        |      |                                                                                                                                                                                                                                                                             |
| YNL136W                    | EAF7 | Subunit of the NuA4 histone acetyltransferase complex                                                                                                                                                                                                                       |
| (161) MODULE 194           |      |                                                                                                                                                                                                                                                                             |
| <b>Genotype regulators</b> |      |                                                                                                                                                                                                                                                                             |
| M11_79182_98336            |      | PRS1(0,1) FAS1(2,2) YKL183C-A LOT5(1,2) SPE1(2,1) ASH1(1,8) MTR2(0,11) YKL187C PXA2(3,7) HYM1(1,36) CNB1(18,1) DPH2(4,7) ACP1(1,7) SDS22(0,0) MST1(2,19) MIA40(3,0) YKT6(0,0) PEX1(1,20) PTK1(23,2)                                                                         |
| <b>Module genes</b>        |      |                                                                                                                                                                                                                                                                             |
| YKL187C                    | None |                                                                                                                                                                                                                                                                             |
| (162) MODULE 195           |      |                                                                                                                                                                                                                                                                             |
| <b>Genotype regulators</b> |      |                                                                                                                                                                                                                                                                             |
| M4_263770_273846           |      | ARR4(0,1) DUN1(149,2) CDC2(426,139) QRI1(2,3) QRI7(4,3) QRI2(1,2) PHO2(2,2) MSS2(4,4) KIN28(0,2) YDL109C YDL110C RRP42(1,4) TRM3(12,5) ATG20(3,5) YDL114W YDL114W-A IWR1(0,6)                                                                                               |
| <b>Module genes</b>        |      |                                                                                                                                                                                                                                                                             |
| YDL105W                    | QRI2 | Nuclear protein of unknown function                                                                                                                                                                                                                                         |
| (163) MODULE 196           |      |                                                                                                                                                                                                                                                                             |
| <b>Genotype regulators</b> |      |                                                                                                                                                                                                                                                                             |
| M16_387239_420441          |      | CWC27(7,5) VPS28(2,2) YPL066W YPL067C YPL068C BTS1(1,3) MUK1(0,0) YPL071C UBP16(2,2) YPL073C YTA6(0,0) GCR1(5,0) GPI2(0,0) YPL077C ATP4(1,2) RPL21B(4,0) YPL080C RPS9A(3,13) MOT1(1,4) SEN54(2,1) BRO1(3,3) SEC16(11,3) ELP3(0,3) YDC1(0,3) YPL088W RLM1(41,4) RPS6A(2,377) |
| <b>Module genes</b>        |      |                                                                                                                                                                                                                                                                             |
| YPL088W                    | None |                                                                                                                                                                                                                                                                             |
| (164) MODULE 197           |      |                                                                                                                                                                                                                                                                             |



|                            |      |                                                                                                                                                                                                                                                                     |
|----------------------------|------|---------------------------------------------------------------------------------------------------------------------------------------------------------------------------------------------------------------------------------------------------------------------|
| <b>Genotype regulators</b> |      |                                                                                                                                                                                                                                                                     |
| M16_511400_523450          |      | RRP12(5,1) MRPS16(0,1) YPL014W HST2(1,2) SWI1(12,30) YPL017C CTF19(3,5) VTC3(271,210) ULP1(2,6) ECM23(4,18) RAD1(9,2) MET12(4,2) NCE4(0,13) YPL025C SKS1(14,5)                                                                                                      |
| <b>Module genes</b>        |      |                                                                                                                                                                                                                                                                     |
| YPL016W                    | SWI1 | Global transcription activator that acts in complex with Snf2p, Snf5p, Snf6p, and Swi3p to assist gene-specific activators; involved in the regulation of expression of many genes, including ADH1, ADH2, GAL1, HO, INO1 and SUC2; Zinc-finger transcription factor |
| (165) MODULE 198           |      |                                                                                                                                                                                                                                                                     |
| <b>Genotype regulators</b> |      |                                                                                                                                                                                                                                                                     |
| M13_371857_379981          |      | YMR046C YMR046W-A NUP116(9,3) CSM3(3,3) ERB1(3,1) YMR050C YMR052C-A FAR3(2,38) STB2(4,0) STV1(1,0) BUB2(1,4) AAC1(1,15) YMR057C FET3(4,15)                                                                                                                          |
| <b>Module genes</b>        |      |                                                                                                                                                                                                                                                                     |
| YMR048W                    | CSM3 | Protein required for accurate chromosome segregation during meiosis                                                                                                                                                                                                 |
